# Supplementary material for: Are Tropical Reptiles Really Declining? A Six-year Survey of Snakes in Drake Bay, Costa Rica, and the Role of Temperature, Rain and Light
Source: Preprints.org preprint supplement (doi:10.20944/preprints201908.0123.v1), 2019-08-11

## DIGITAL APPENDIX 2

### 1- Photographic catalogue of snake species found in Drake Bay, Costa Rica.

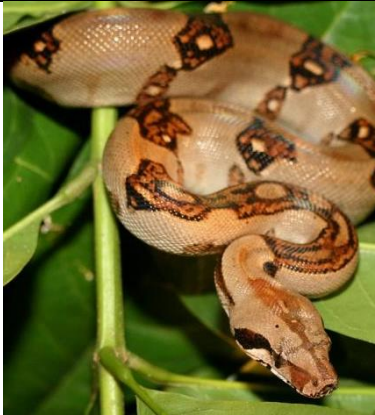

*Boa imperator*

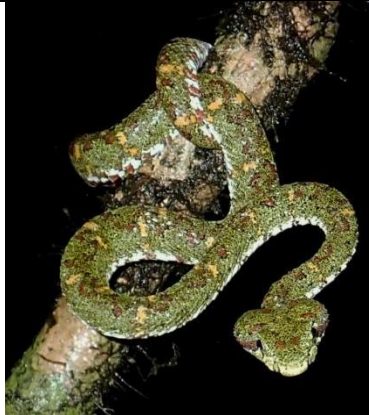

*Bothriechis schlegelii*

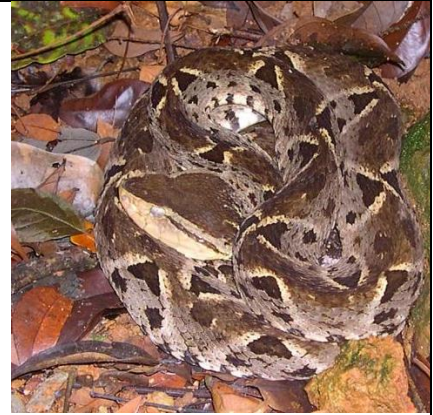

*Bothrops asper*

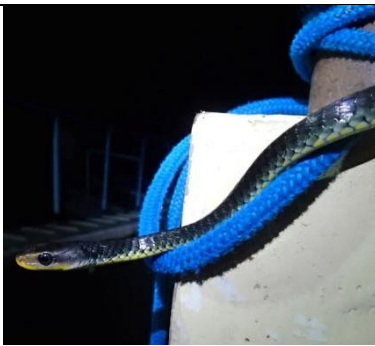

*Chironius flavopictus*

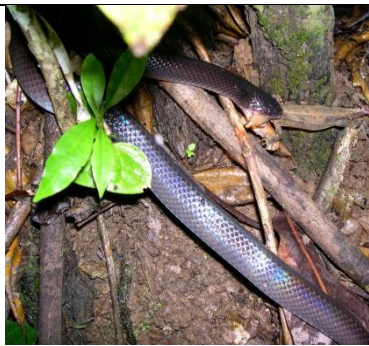

*Clelia clelia*

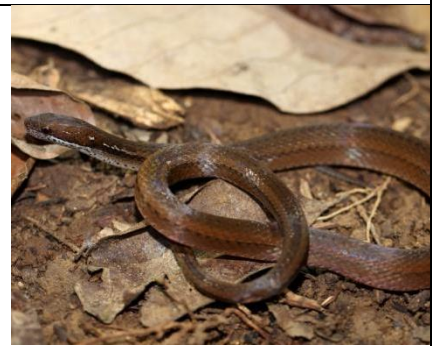

*Coniophanes fissidens*

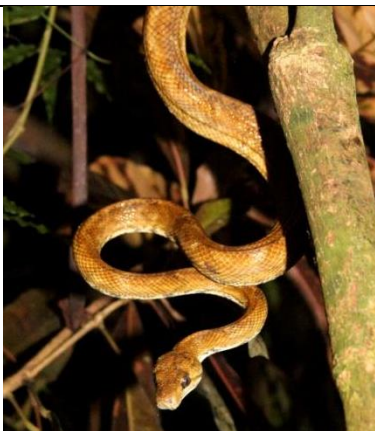

*Corallus ruschenbergerii*

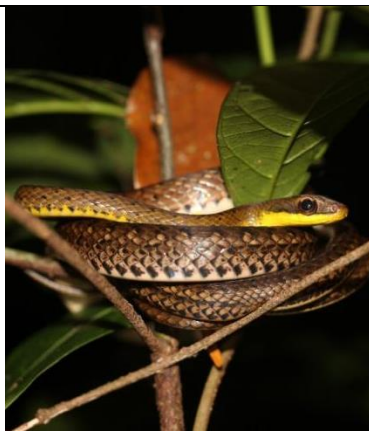

*Dendrophidion percarinatus*

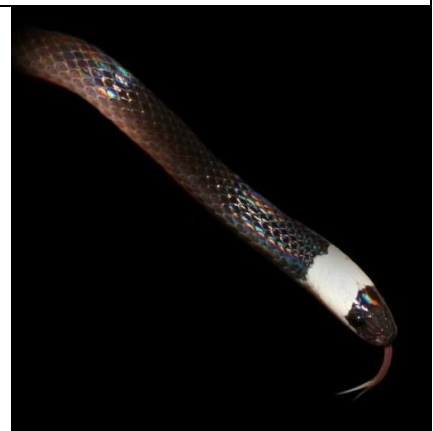

*Enuliophis sclateri*

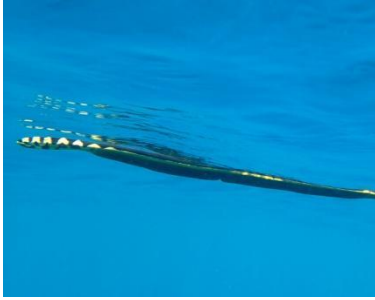

*Hydrophis platurus*

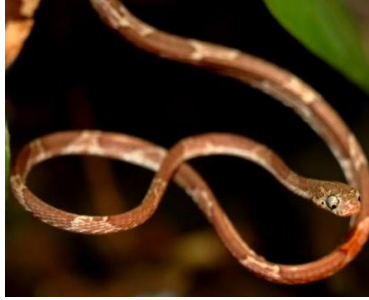

*Imantodes cenchoa*

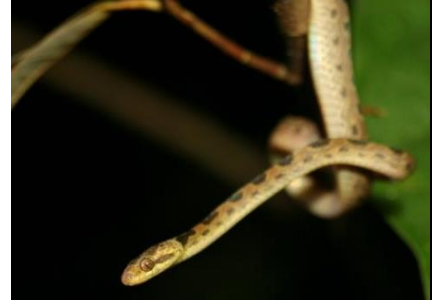

*Leptodeira septentrionalis*

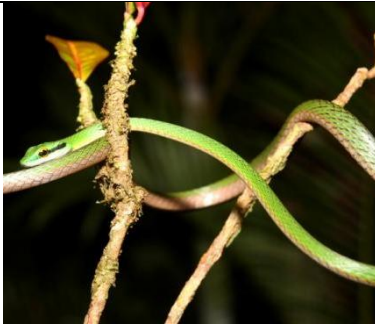

*Leptophis ahaetulla*

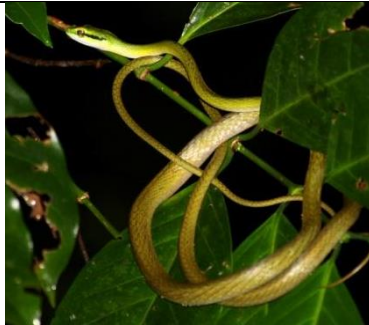

*Leptophis nebulosus*

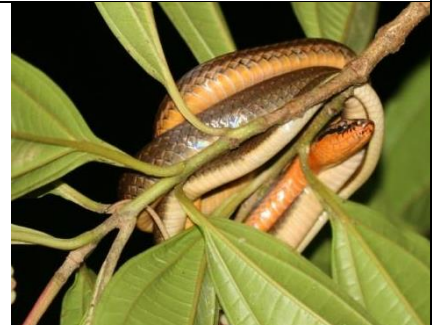

*Mastigodryas melanolomus*

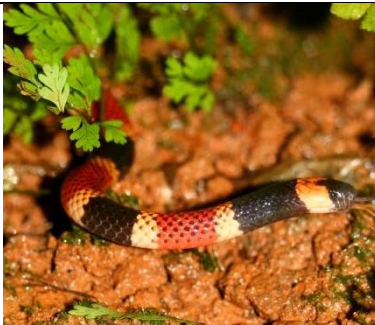

*Micrurus alleni*

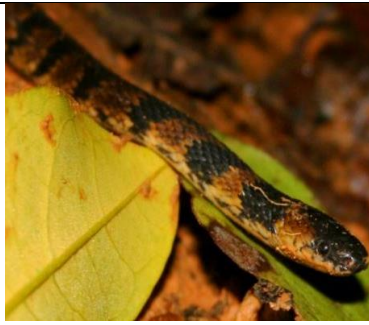

*Ninia maculata*

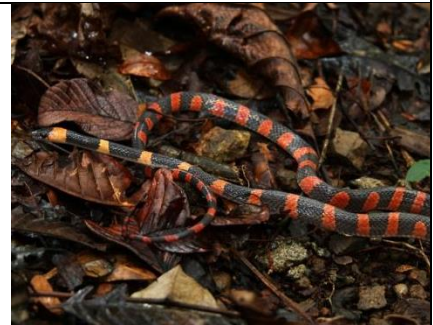

*Oxyrhopus petolaris*

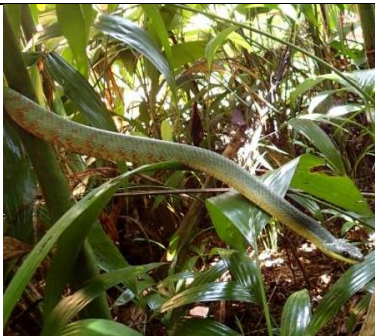

*Phrynonax poecilonotus*

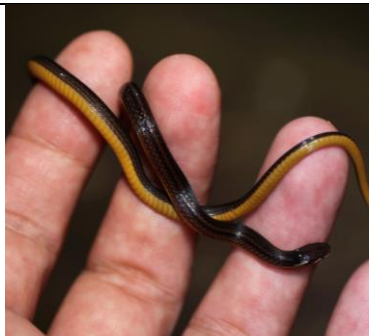

*Rhadinella godmani*

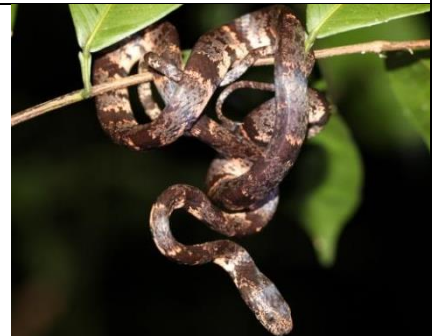

*Sibon nebulatus*



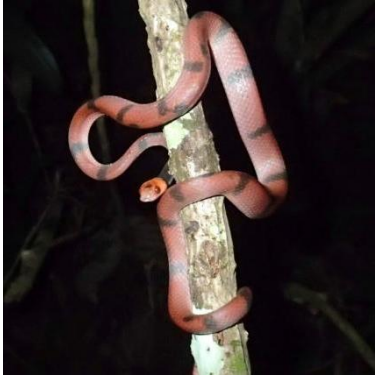

*Siphlophis compressus*

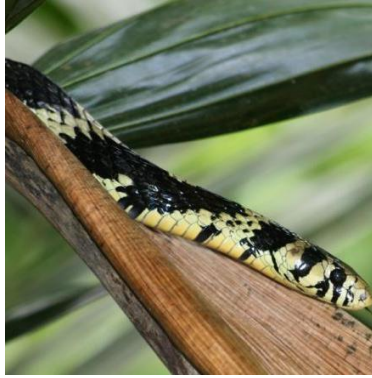

*Spilotes pullatus*

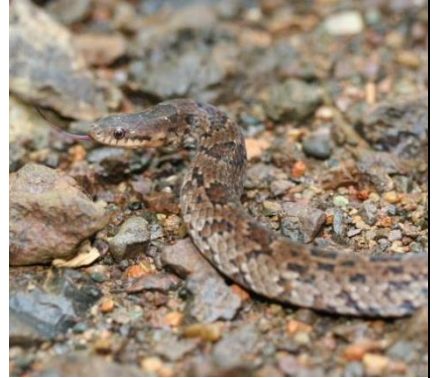

*Stenorrhina degenhardtii*

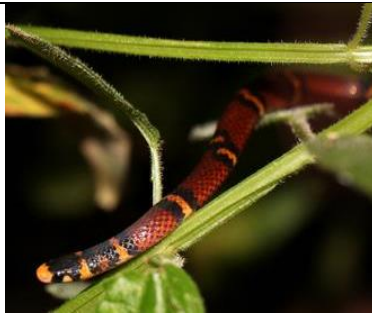

*Tantilla supracincta*

2- Total sampling hours per month and year during the six year study period ion  
Drake, Costa Rica.

| Month            | Sampling hours |       |       |       |       |       |
|------------------|----------------|-------|-------|-------|-------|-------|
|                  | 2012           | 2013  | 2014  | 2015  | 2016  | 2017  |
| <b>January</b>   | 64,75          | 70,25 | 61,5  | 82,5  | 69,25 | 84,75 |
| <b>February</b>  | 73,5           | 62,5  | 46    | 68,75 | 84,75 | 57,75 |
| <b>March</b>     | 53,75          | 74    | 59,25 | 94,5  | 87,25 | 73,75 |
| <b>April</b>     | 75,25          | 58,75 | 57,5  | 74    | 72    | 62,25 |
| <b>May</b>       | 38,75          | 40,75 | 32,75 | 41,25 | 0     | 34,25 |
| <b>June</b>      | 40,25          | 28    | 48,25 | 38,75 | 48,25 | 36,5  |
| <b>July</b>      | 66,5           | 71    | 40    | 53,75 | 57,5  | 59,25 |
| <b>August</b>    | 59,75          | 29    | 52    | 67,5  | 67,5  | 48,5  |
| <b>September</b> | 7,75           | 18,25 | 23,75 | 37,75 | 17,75 | 0     |
| <b>October</b>   | 5              | 11,25 | 18    | 2,75  | 0     | 2,5   |
| <b>November</b>  | 67,5           | 49,25 | 68    | 51,25 | 38,25 | 0     |

### 3- Sightings per hour by species, month and year in Drake Bay, Costa Rica, according to snake species.

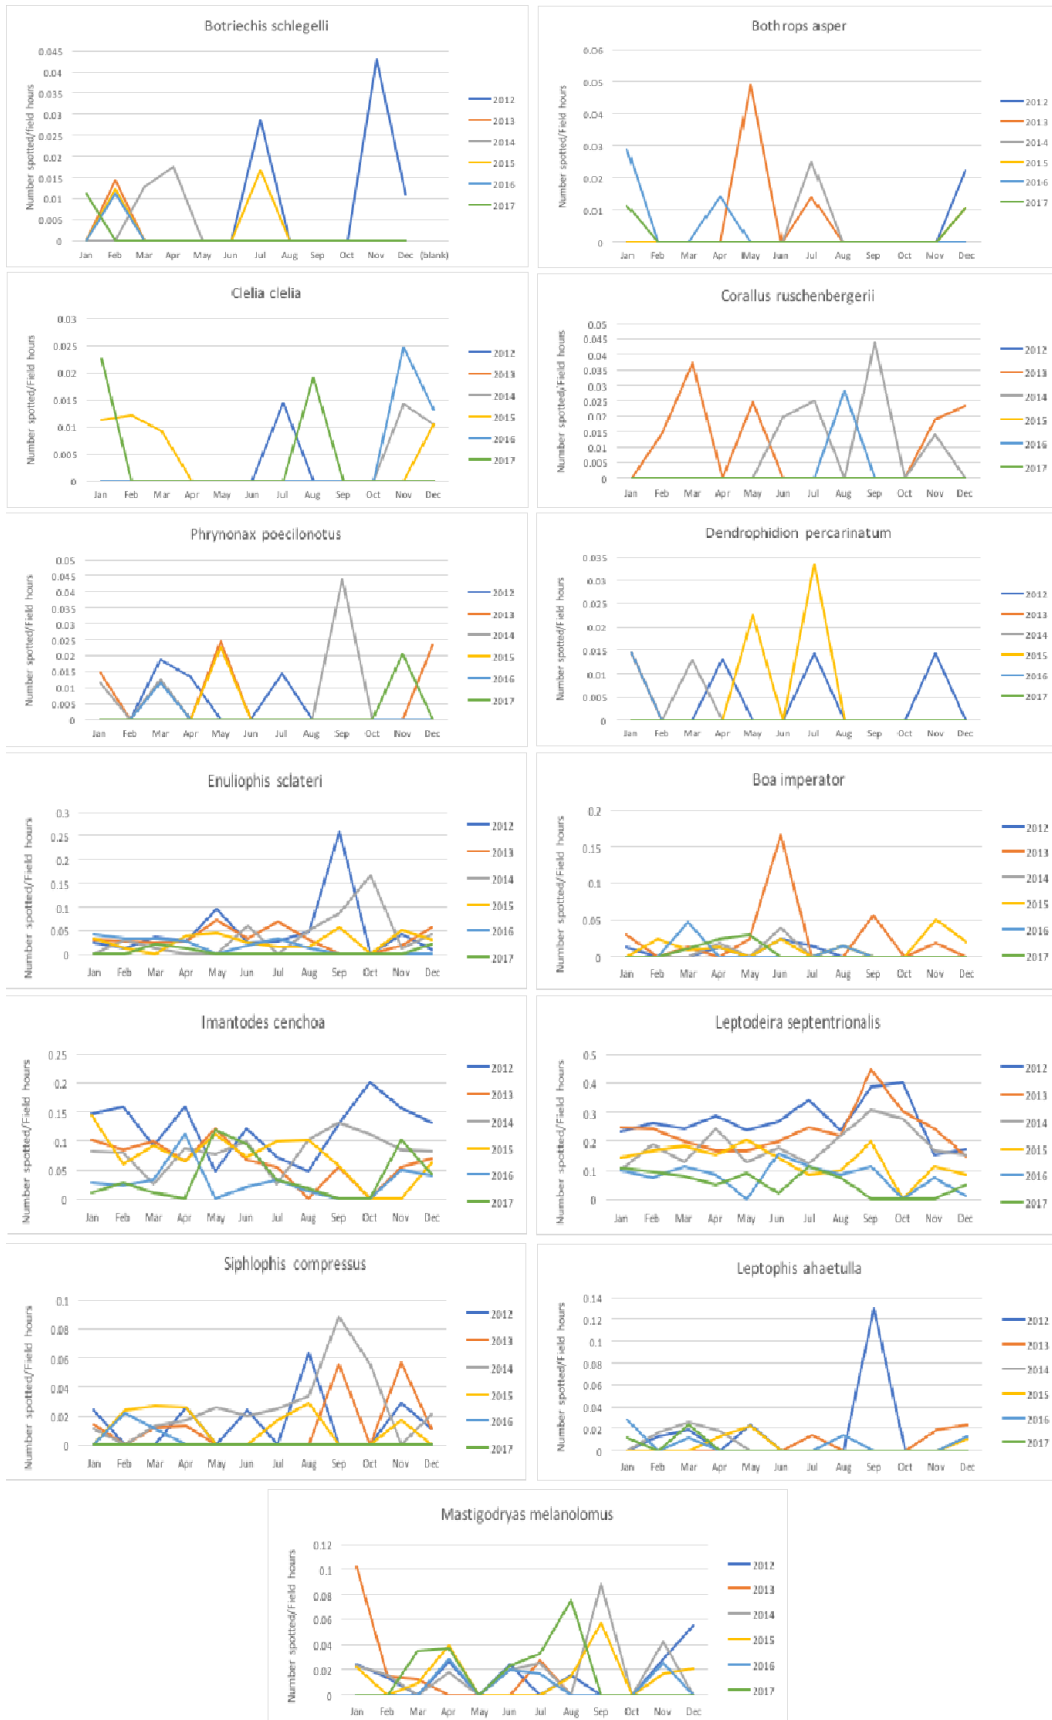



4 - Leaf litter comparison, left photograph taken on May 2013, right photograph taken on January 2018 (both by Gianfranco Gómez).

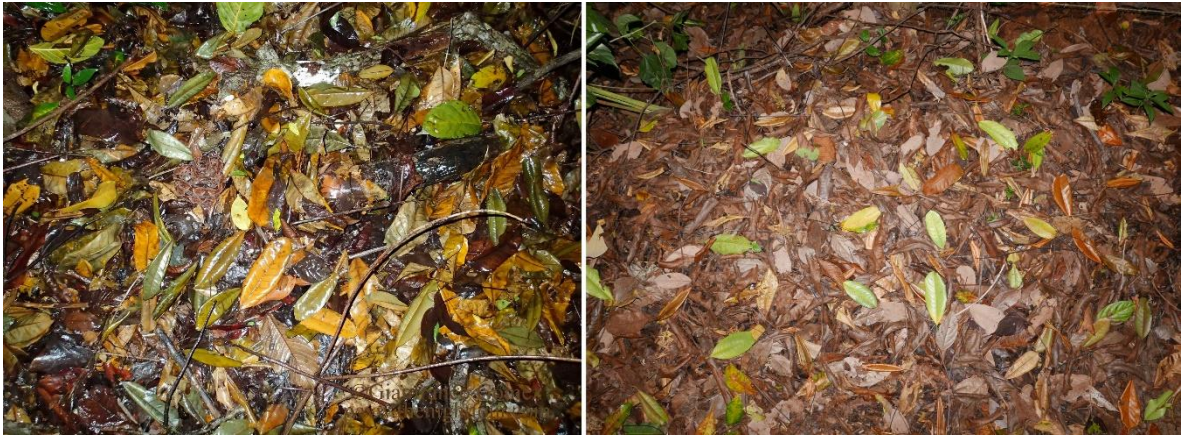

Supplement: Supplementary file 1 [file supplementary]
