# Supplementary material for: Are Tropical Reptiles Really Declining? A Six-year Survey of Snakes in Drake Bay, Costa Rica, and the Role of Temperature, Rain and Light
Source: Preprints.org preprint supplement (doi:10.20944/preprints201908.0123.v1), 2019-08-11
Supplement: Supplementary file 2 [file supplementary]

## DIGITAL APPENDIX 1

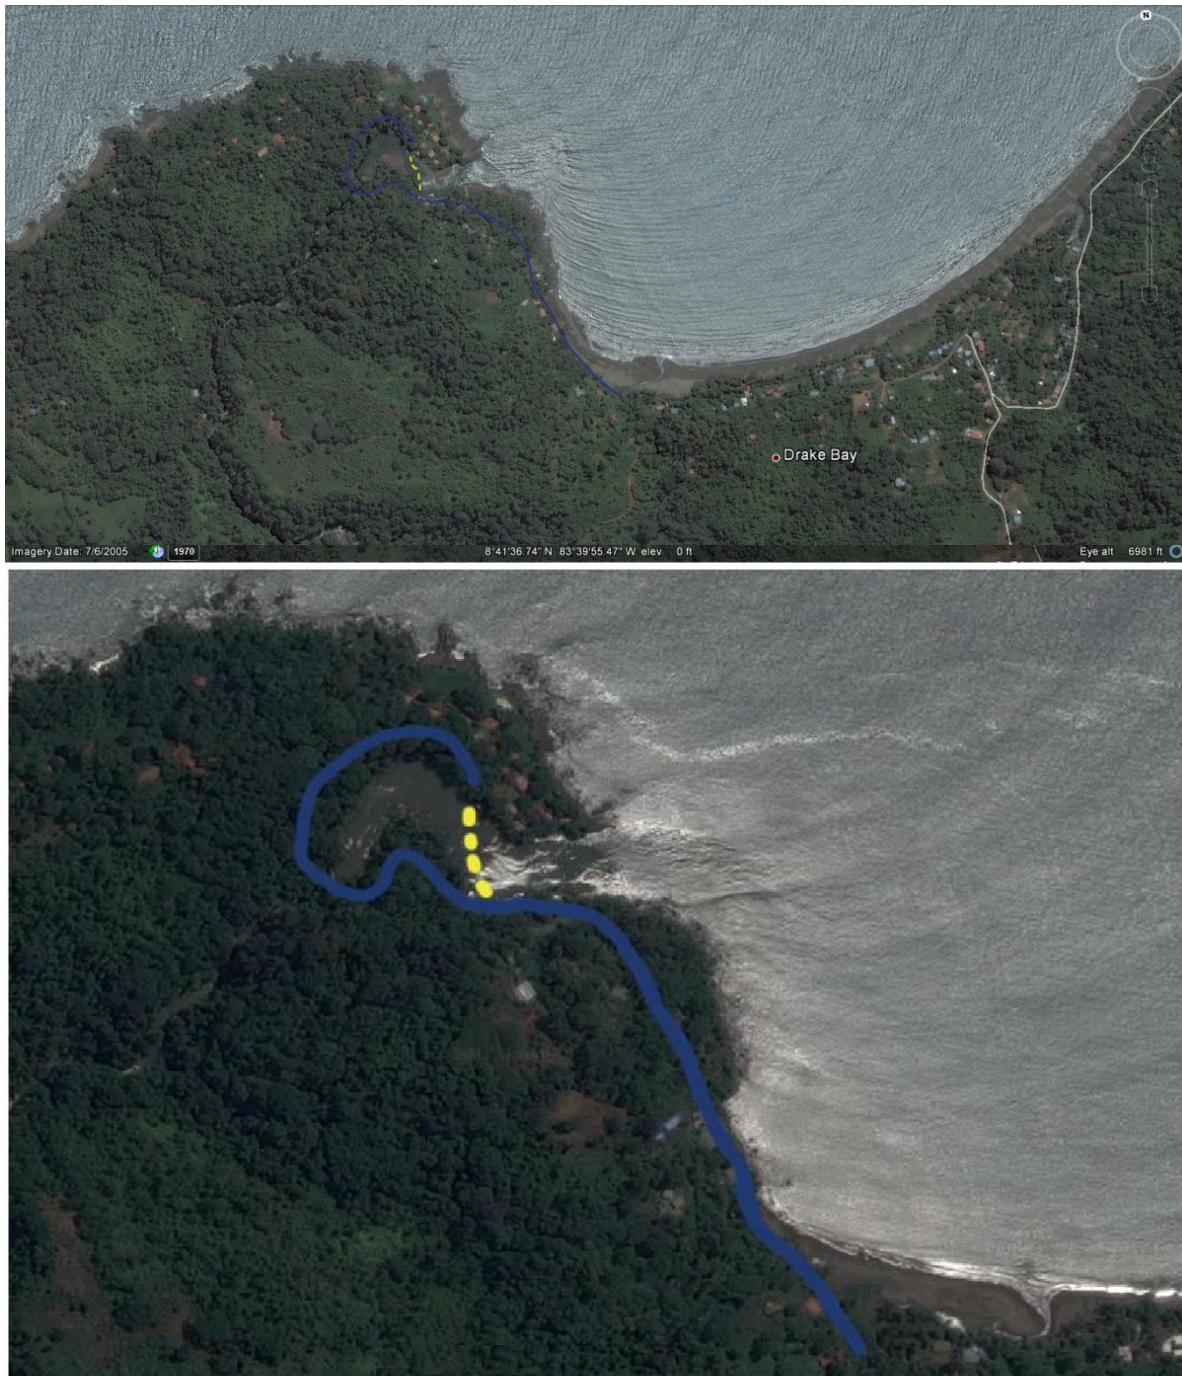

**Fig. 1.** Sampled transect where we counted snakes near the Agujas River, Drake Bay, Costa Rica (lower image: detail of area in upper image)- Aerial photographs from Google Earth; see Methods for coordinates).

TABLE 1

Snake species found on the surveyed years and their main prey items according to the literature (Savage, 2002; Solórzano, 2004)).

| Species                           | Prey item     |      |            |          |       |         |
|-----------------------------------|---------------|------|------------|----------|-------|---------|
|                                   | Invertebrates | Fish | Amphibians | Reptiles | Birds | Mammals |
| <i>Boa imperator</i>              | -             | -    | -          | X        | X     | X       |
| <i>Bothriechis schlegelii</i>     | -             | -    | X          | X        | X     | X       |
| <i>Bothrops asper</i>             | -             | -    | X          | X        | X     | X       |
| <i>Chironius flavopictus</i>      | -             | -    | X          | -        | -     | -       |
| <i>Clelia clelia</i>              | -             | -    | -          | X        | X     | X       |
| <i>Coniophanes fissidens</i>      | -             | -    | X          | X        | -     | -       |
| <i>Corallus ruschenbergerii</i>   | -             | -    | -          | X        | X     | X       |
| <i>Dendrophidion percarinatum</i> | -             | -    | X          | -        | -     | -       |
| <i>Enuliophis sclateri</i>        | -             | -    | -          | X        | -     | -       |
| <i>Hydrophis platurus</i>         | -             | X    | -          | -        | -     | -       |
| <i>Imantodes cenchoa</i>          | -             | -    | X          | X        | -     | -       |
| <i>Leptodeira septentrionalis</i> | -             | -    | X          | X        | -     | -       |
| <i>Leptophis ahaetulla</i>        | -             | -    | X          | X        | X     | -       |
| <i>Leptophis nebulosus</i>        | -             | -    | X          | -        | -     | -       |
| <i>Mastigodryas melanolomus</i>   | -             | -    | X          | X        | X     | X       |
| <i>Micrurus alleni</i>            | -             | -    | X          | X        | -     | -       |
| <i>Ninia maculata</i>             | X             | -    | -          | -        | -     | -       |
| <i>Oxyrhopus petolarius</i>       | -             | -    | X          | X        | -     | X       |
| <i>Phrynonax poecilonotus</i>     | -             | -    | -          | -        | X     | X       |
| <i>Rhadinella godmani</i>         | -             | -    | X          | X        | -     | -       |
| <i>Sibon nebulatus</i>            | X             | -    | -          | -        | -     | -       |
| <i>Siphlophis compressus</i>      | -             | -    | -          | X        | -     | -       |
| <i>Spilotes pullatus</i>          | -             | -    | -          | X        | X     | X       |
| <i>Stenorrhina degenhardtii</i>   | X             | -    | -          | -        | -     | -       |
| <i>Tantilla supracincta</i>       | X             | -    | -          | -        | -     | -       |

TABLE 2

ANOVA results for *Rainfall* versus *Counts per hour* of the most common snake species, Drake Bay, Costa Rica.

|                                                            |        |     |                |                   |         |
|------------------------------------------------------------|--------|-----|----------------|-------------------|---------|
| <b><i>Leptodeira septentrionalis.</i></b>                  |        |     |                |                   |         |
| Variance analysis                                          |        |     |                |                   |         |
| Variable                                                   | N      |     | R <sup>2</sup> | R <sup>2</sup> Aj | CV      |
| Rate                                                       | 216    |     | 0,03           | 0,02              | 131,61  |
| Variance analysis table (SC type III)                      |        |     |                |                   |         |
| F.V.                                                       | SC     | gl  | CM             | F                 | p-value |
| Model                                                      | 0,25   | 2   | 0,13           | 3,08              | 0,0482  |
| Weather                                                    | 0,25   | 2   | 0,13           | 3,08              | 0,0482  |
| Error                                                      | 8,75   | 213 | 0,04           |                   |         |
| Total                                                      | 9,00   | 215 |                |                   |         |
| Adjusted median, standard error and number of observations |        |     |                |                   |         |
| Error: 0,0411 df: 213                                      |        |     |                |                   |         |
| Weather                                                    | Median |     | n              |                   | E.E.    |
| Rainy                                                      | 0,12   |     | 72             |                   | 0,02    |
| Light Rain                                                 | 0,14   |     | 72             |                   | 0,02    |
| Dry                                                        | 0,20   |     | 72             |                   | 0,02    |
| <b><i>Imantodes cenchoa.</i></b>                           |        |     |                |                   |         |
| Variance analysis                                          |        |     |                |                   |         |
| Variable                                                   | N      |     | R <sup>2</sup> | R <sup>2</sup> Aj | CV      |
| Rate                                                       | 216    |     | 0,02           | 0,01              | 165,09  |
| Variance analysis table (SC type III)                      |        |     |                |                   |         |
| F.V.                                                       | SC     | gl  | CM             | F                 | p-value |
| Model                                                      | 0,04   | 2   | 0,02           | 2,11              | 0,1233  |
| Weather                                                    | 0,04   | 2   | 0,02           | 2,11              | 0,1233  |
| Error                                                      | 1,81   | 213 | 0,01           |                   |         |
| Total                                                      | 1,85   | 215 |                |                   |         |
| Test: Tukey Alfa=0,05 DMS=0,03606                          |        |     |                |                   |         |
| Error: 0,0085 df: 213                                      |        |     |                |                   |         |
| Weather                                                    | Median |     | n              |                   | E.E.    |
| Rainy                                                      | 0,05   |     | 72             |                   | 0,01 A  |
| Light Rain                                                 | 0,05   |     | 72             |                   | 0,01 A  |
| Dry                                                        | 0,07   |     | 72             |                   | 0,01 A  |
| <b><i>Enuliophis sclateri.</i></b>                         |        |     |                |                   |         |
| Variance analysis                                          |        |     |                |                   |         |
| Variable                                                   | N      |     | R <sup>2</sup> | R <sup>2</sup> Aj | CV      |
| Rate                                                       | 216    |     | 0,07           | 0,06              | 246,90  |
| Variance analysis table (SC type III)                      |        |     |                |                   |         |
| F.V.                                                       | SC     | gl  | CM             | F                 | p-value |
| Model                                                      | 0,04   | 2   | 0,02           | 8,30              | 0,0003  |
| Weather                                                    | 0,04   | 2   | 0,02           | 8,30              | 0,0003  |

Error 0,48 213 2, 3E-03

Total 0,52 215

Test: Tukey Alfa=0,05 DMS=0,01866

Error: 0,0023 df: 213

| Weather    | Median | N  | E.E.   |
|------------|--------|----|--------|
| Rainy      | 0,01   | 72 | 0,01 A |
| Light Rain | 0,02   | 72 | 0,01 A |
| Dry        | 0,04   | 72 | 0,01 B |

**Other species (all data from less common species pooled).**

Variance analysis

| Variable | N   | R <sup>2</sup> | R <sup>2</sup> Aj | CV     |
|----------|-----|----------------|-------------------|--------|
| Rate     | 216 | 0,03           | 0,02              | 281,14 |

Variance analysis table (SC type III)

| F.V.    | SC   | gl  | CM   | F    | p-value |
|---------|------|-----|------|------|---------|
| Model   | 0,23 | 2   | 0,11 | 3,20 | 0,0429  |
| Weather | 0,23 | 2   | 0,11 | 3,20 | 0,0429  |
| Error   | 7,63 | 213 | 0,04 |      |         |
| Total   | 7,86 | 215 |      |      |         |

Test: Tukey Alfa=0,05 DMS=0,07404

Error: 0,0358 df: 213

| Weather    | Median | N  | E.E.     |
|------------|--------|----|----------|
| Rainy      | 0,03   | 72 | 0,02 A   |
| Light Rain | 0,07   | 72 | 0,02 A B |
| Dry        | 0,11   | 72 | 0,02 B   |

TABLE 3

ANOVA results for *Moonlight* versus *Counts per hour* of snakes, Drake Bay, Costa Rica.

|                                           |          |     |                |                   |          |
|-------------------------------------------|----------|-----|----------------|-------------------|----------|
| <b><i>Leptodeira septentrionalis.</i></b> |          |     |                |                   |          |
| Variance analysis                         |          |     |                |                   |          |
| Variable                                  | N        |     | R <sup>2</sup> | R <sup>2</sup> Aj | CV       |
| Rate                                      | 216      |     | 0,04           | 0,03              | 116,75   |
| Variance analysis table (SC type III)     |          |     |                |                   |          |
| F.V.                                      | SC       | gl  | CM             | F                 | p-value  |
| Model                                     | 0,33     | 2   | 0,17           | 4,70              | 0,0100   |
| Moonlight                                 | 0,33     | 2   | 0,17           | 4,70              | 0,0100   |
| Error                                     | 7,57     | 213 | 0,04           |                   |          |
| Total                                     | 7,91     | 215 |                |                   |          |
| Test: Tukey Alfa=0,05 DMS=0,07376         |          |     |                |                   |          |
| Error: 0,0356 gl: 213                     |          |     |                |                   |          |
| Moonlight                                 | Median   |     | n              |                   | E.E.     |
| Bright                                    | 0,12     |     | 72             |                   | 0,02 A   |
| Semi-bright                               | 0,15     |     | 72             |                   | 0,02 A B |
| Dark                                      | 0,21     |     | 72             |                   | 0,02 B   |
|                                           |          |     |                |                   |          |
| <b><i>Imantodes cenchoa.</i></b>          |          |     |                |                   |          |
| Variance analysis                         |          |     |                |                   |          |
| Variable                                  | N        |     | R <sup>2</sup> | R <sup>2</sup> Aj | CV       |
| Rate                                      | 216      |     | 3,4 E-04       | 0,00              | 164,81   |
| Variance analysis table (SC type III)     |          |     |                |                   |          |
| F.V.                                      | SC       | gl  | CM             | F                 | p-value  |
| Model                                     | 9,7 E-04 | 2   | 4,8E-04        | 0,04              | 0,9642   |
| Moonlight                                 | 9,7 E-04 | 2   | 4,8E-04        | 0,04              | 0,9642   |
| Error                                     | 2,82     | 213 | 0,01           |                   |          |
| Total                                     | 2,82     | 215 |                |                   |          |
| Test: Tukey Alfa=0,05 DMS=0,04503         |          |     |                |                   |          |
| Error: 0,0132 gl: 213                     |          |     |                |                   |          |
| Moonlight                                 | Median   |     | n              |                   | E.E.     |
| Bright                                    | 0,07     |     | 72             |                   | 0,01 A   |
| Dark                                      | 0,07     |     | 72             |                   | 0,01 A   |
| Semi-bright                               | 0,07     |     | 72             |                   | 0,01 A   |
|                                           |          |     |                |                   |          |
| <b><i>Enuliophis sclateri.</i></b>        |          |     |                |                   |          |
| Variance analysis                         |          |     |                |                   |          |
| Variable                                  | N        |     | R <sup>2</sup> | R <sup>2</sup> Aj | CV       |
| Rate                                      | 216      |     | 0,03           | 0,02              | 243,36   |
| Variance analysis table (SC type III)     |          |     |                |                   |          |
| F.V.                                      | SC       | gl  | CM             | F                 | p-value  |
| Model                                     | 0,02     | 2   | 0,01           | 3,01              | 0,0512   |
| Moonlight                                 | 0,02     | 2   | 0,01           | 3,01              | 0,0512   |
| Error                                     | 0,74     | 213 | 3,5 E-03       |                   |          |
| Total                                     | 0,76     | 215 |                |                   |          |

Test: Tukey Alfa=0,05 DMS=0,02302

Error: 0,0035 gl: 213

| Moonlight   | Median | N  | E.E.   |
|-------------|--------|----|--------|
| Semi-bright | 0,01   | 72 | 0,01 A |
| Bright      | 0,03   | 72 | 0,01 A |
| Dark        | 0,03   | 72 | 0,01 A |

**Other species (all data from less common species pooled).**

Variance analysis

| Variable | N   | R <sup>2</sup> | R <sup>2</sup> Aj | CV     |
|----------|-----|----------------|-------------------|--------|
| Rate     | 216 | 4,0 E-03       | 0,00              | 259,35 |

Variance analysis table (SC type III)

| F.V.      | SC   | gl  | CM   | F    | p-value |
|-----------|------|-----|------|------|---------|
| Model     | 0,02 | 2   | 0,01 | 0,43 | 0,6499  |
| Moonlight | 0,02 | 2   | 0,01 | 0,43 | 0,6499  |
| Error     | 5,65 | 213 | 0,03 |      |         |
| Total     | 5,68 | 215 |      |      |         |

Test: Tukey Alfa=0,05 DMS=0,06373

Error: 0,0265 gl: 213

| Moonlight   | Median | N  | E.E.   |
|-------------|--------|----|--------|
| Semi-bright | 0,05   | 72 | 0,02 A |
| Dark        | 0,06   | 72 | 0,02 A |
| Bright      | 0,08   | 72 | 0,02 A |

---

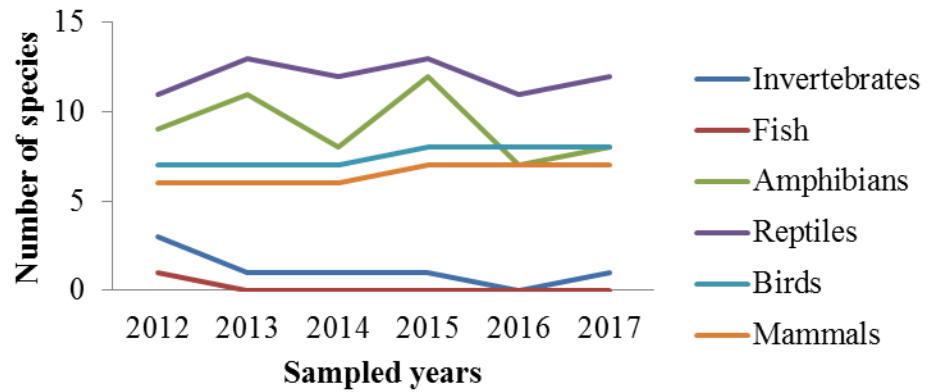

**Fig. 2.** Number of species with each diet type (diets from Savage, 2002; and Solórzano, 2004) seen per year. Species can be included on more than one category.

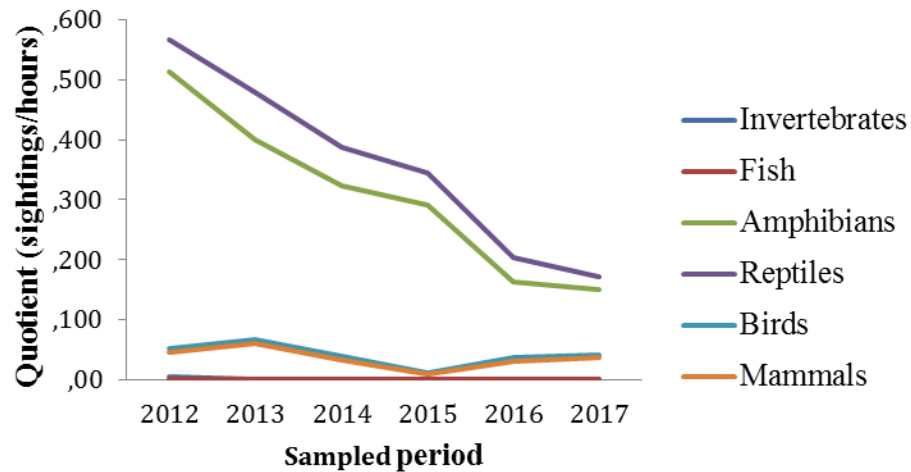

**Fig. 3.** Species counts (sightings per/hour) for each diet and sampling year

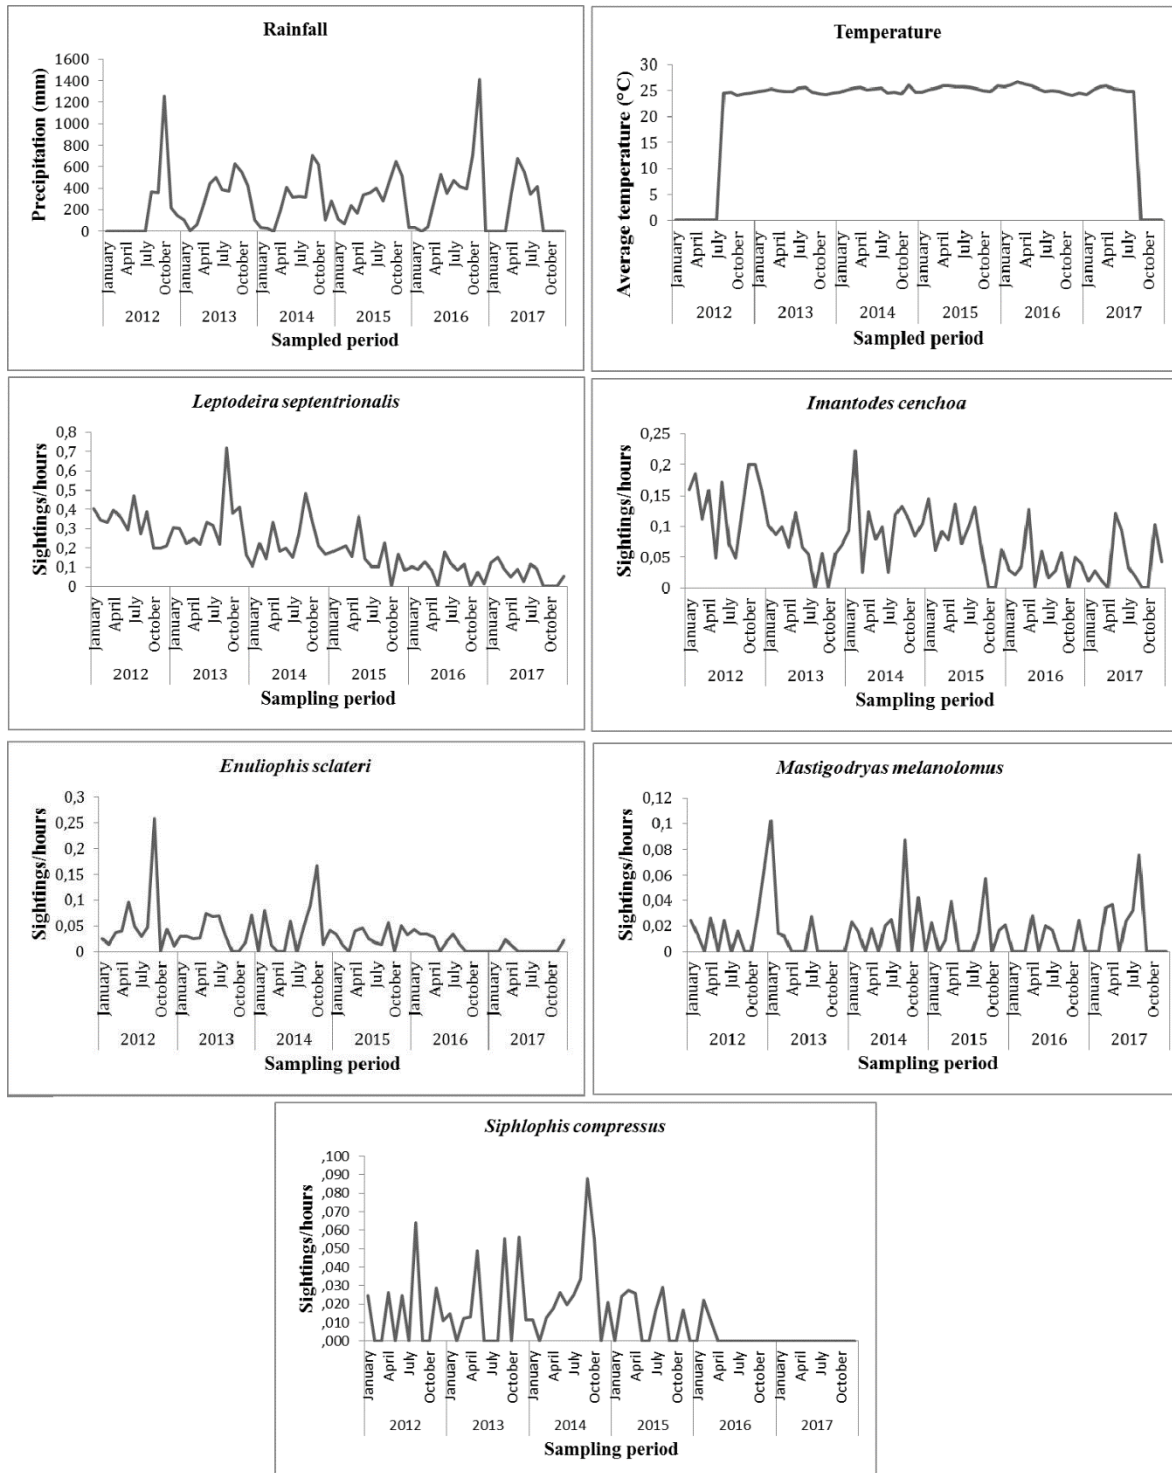

**Fig. 4.** Counts per hour of the five most frequent snakes species during the six-year study period in Drake, Costa Rica (2012-2017).



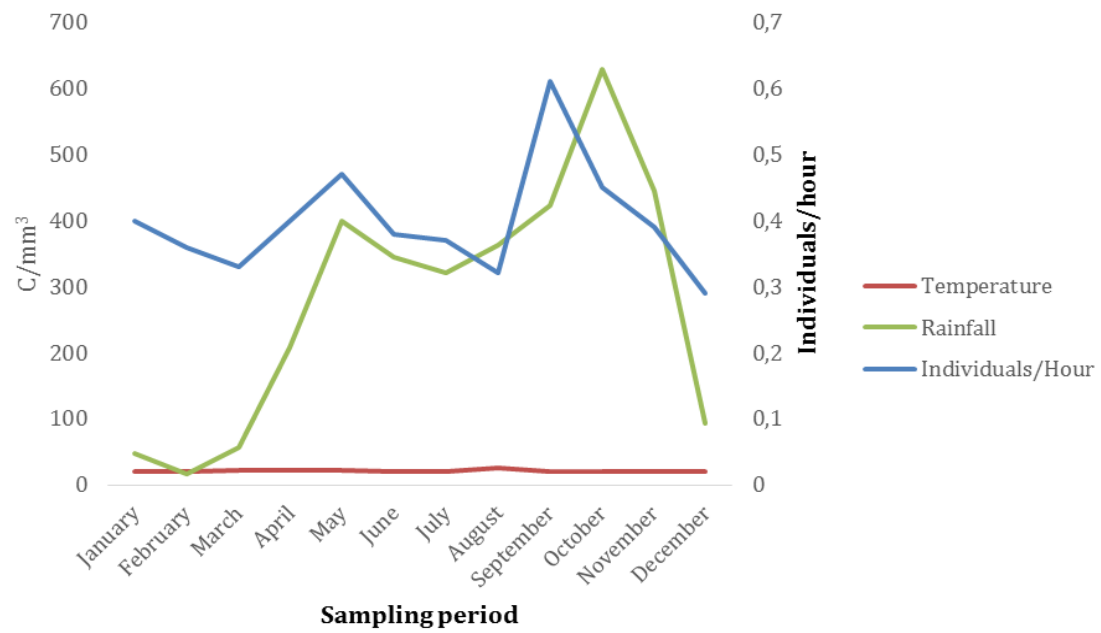

**Fig. 5.** Mean temperature, mean rainfall and individuals seen per hour for Drake snakes (Costa Rica).

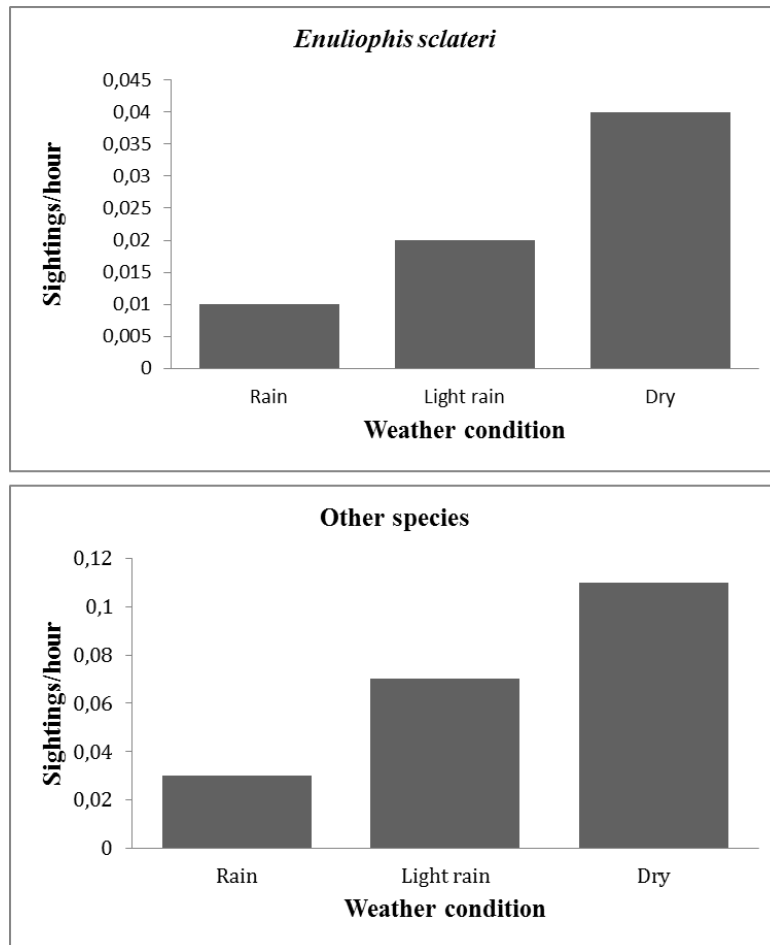

**Fig. 6.** Sightings per hour of snakes, according to rain level, in Drake, Costa Rica.

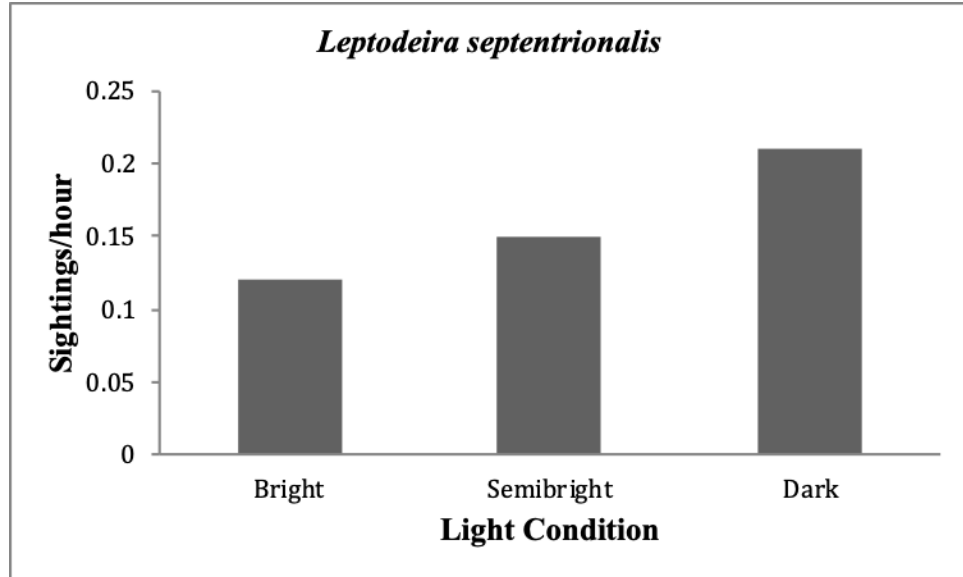

**Fig. 7.** Sightings per hour of the snake *L. septentrionalis*, according to moon light level, in Drake, Costa Rica.
