# Supplementary material for: Are Tropical Reptiles Really Declining? A Six-year Survey of Snakes in Drake Bay, Costa Rica, and the Role of Temperature, Rain and Light
Source: Preprints.org preprint supplement (doi:10.20944/preprints201908.0123.v1), 2019-08-11
Supplement: Supplementary file 3 [file snakes Drake feb_2018.xlsx]

## Sheet: data
Month	Year	Date	Species	Common Name	Type	Number Spotted	Moon Phase	Light Conditions	Weather Conditions	Time	Moonrise	Moonset	Field Hours
January	2012	2012-01-02	Boa imperator	Boa Constrictor	Reptile	1	Waxing Gibbous (63.8% Full)	Semi-bright	Dry	8:00 - 10:00	No Record	No Record	2
January	2012	2012-01-02	Imantodes cenchoa	Chunk-headed Snake	Reptile	1	Waxing Gibbous (63.8% Full)	Semi-bright	Dry	8:00 - 10:00	No Record	No Record	0
January	2012	2012-01-03	Mastigodryas melanolomus	Neotropical Racer	Reptile	1	Waxing Gibbous (69.6% Full)	Semi-bright	Dry	5:30 - 7:30	No Record	No Record	0
January	2012	2012-01-03	Tantilla supracincta	Coral Crowned Snake	Reptile	1	Waxing Gibbous (69.6% Full)	Semi-bright	Dry	5:30 - 7:30	No Record	No Record	2
January	2012	2012-01-03	Leptodeira septentrionalis	Northern Cat Eyed Snake	Reptile	2	Waxing Gibbous (69.6% Full)	Semi-bright	Dry	7:30 - 10:00	No Record	No Record	2.5
January	2012	2012-01-03	Mastigodryas melanolomus	Neotropical Racer	Reptile	1	Waxing Gibbous (69.6% Full)	Semi-bright	Dry	7:30 - 10:00	No Record	No Record	0
January	2012	2012-01-04	Imantodes cenchoa	Chunk-headed Snake	Reptile	1	Waxing Gibbous (80.6% Full)	Semi-bright	Dry	6:00 - 8:00	No Record	No Record	2
January	2012	2012-01-04	Siphlophis compressus	Red-eyed Tree Snake	Reptile	1	Waxing Gibbous (80.6% Full)	Semi-bright	Dry	6:00 - 8:00	No Record	No Record	0
January	2012	2012-01-04	Imantodes cenchoa	Chunk-headed Snake	Reptile	1	Waxing Gibbous (80.6% Full)	Semi-bright	Dry	8:00 - 10:00	No Record	No Record	0
January	2012	2012-01-04	Leptodeira septentrionalis	Northern Cat Eyed Snake	Reptile	2	Waxing Gibbous (80.6% Full)	Semi-bright	Dry	8:00 - 10:00	No Record	No Record	0
January	2012	2012-01-04	Siphlophis compressus	Red-eyed Tree Snake	Reptile	1	Waxing Gibbous (80.6% Full)	Semi-bright	Dry	8:00 - 10:00	No Record	No Record	2
January	2012	2012-01-05	Leptodeira septentrionalis	Northern Cat Eyed Snake (neonate)	Reptile	1	Waxing Gibbous (89.2% Full)	Bright	Dry	5:30 - 7:30	No Record	No Record	2
January	2012	2012-01-05	Imantodes cenchoa	Chunk-headed Snake	Reptile	1	Waxing Gibbous (89.2% Full)	Bright	Dry	8:00 - 10:00	No Record	No Record	0
January	2012	2012-01-05	Leptodeira septentrionalis	Northern Cat Eyed Snake (neonate)	Reptile	1	Waxing Gibbous (89.2% Full)	Bright	Dry	8:00 - 10:00	No Record	No Record	2
January	2012	2012-01-07	Imantodes cenchoa	Chunk-headed Snake	Reptile	1	Waxing Gibbous (96.1% Full)	Bright	Dry	7:30 - 10:30	No Record	No Record	3
January	2012	2012-01-09	Imantodes cenchoa	Chunk-headed Snake	Reptile	1	Full Moon (100% Full)	Bright	Dry	5:30 - 7:30	No Record	No Record	2
January	2012	2012-01-10	Micrurus alleni	Allen's Coral Snake	Reptile	1	Waning Gibbous (98.6% Full)	Bright	Dry	7:30 - 10:30	No Record	No Record	3
January	2012	2012-01-11	Imantodes cenchoa	Chunk-headed Snake	Reptile	1	Waning Gibbous (92.9% Full)	Semi-bright	Dry	8:00 - 10:00	No Record	No Record	0
January	2012	2012-01-11	Leptodeira septentrionalis	Northern Cat Eyed Snake	Reptile	2	Waning Gibbous (92.9% Full)	Semi-bright	Dry	8:00 - 10:00	No Record	No Record	2
January	2012	2012-01-13	Imantodes cenchoa	Chunk-headed Snake	Reptile	1	Waning Gibbous (81.3% Full)	Dark	Dry	6:00 - 8:00	No Record	No Record	2
January	2012	2012-01-13	Leptodeira septentrionalis	Northern Cat Eyed Snake	Reptile	1	Waning Gibbous (81.3% Full)	Dark	Dry	6:00 - 8:00	No Record	No Record	0
January	2012	2012-01-13	Leptodeira septentrionalis	Northern Cat Eyed Snake	Reptile	1	Waning Gibbous (81.3% Full)	Dark	Dry	7:30 - 10:00	No Record	No Record	2.5
January	2012	2012-01-14	Imantodes cenchoa	Chunk-headed Snake	Reptile	1	Waning Gibbous (68% Full)	Dark	Dry	5:30 - 7:45	No Record	No Record	2.25
January	2012	2012-01-14	Leptodeira septentrionalis	Northern Cat Eyed Snake	Reptile	1	Waning Gibbous (68% Full)	Dark	Dry	5:30 - 7:45	No Record	No Record	0
January	2012	2012-01-14	Leptodeira septentrionalis	Northern Cat Eyed Snake	Reptile	2	Waning Gibbous (68% Full)	Dark	Dry	7:45 - 10:15	No Record	No Record	2.5
January	2012	2012-01-15	Leptodeira septentrionalis	Northern Cat Eyed Snake	Reptile	1	Waning Gibbous (56.1% Full)	Dark	Dry	7:30 - 10:30	No Record	No Record	3
January	2012	2012-01-16	Imantodes cenchoa	Chunk-headed Snake	Reptile	2	Last Quarter (49% Full)	Dark	Dry	8:00 - 10:00	No Record	No Record	0
January	2012	2012-01-16	Leptodeira septentrionalis	northern Cat Eyed Snake	Reptile	3	Last Quarter (49% Full)	Dark	Dry	8:00 - 10:00	No Record	No Record	2
January	2012	2012-01-20	Leptodeira septentrionalis	Northern Cat Eyed Snake	Reptile	1	Waning Crescent (7.8% Full)	Dark	Dry	6:00 - 8:00	No Record	No Record	2
January	2012	2012-01-20	Enuliophis sclateri	Sock-headed Snake	Reptile	1	Waning Crescent (7.8% Full)	Dark	Dry	7:30 - 10:30	No Record	No Record	3
January	2012	2012-01-21	Leptodeira septentrionalis	Northern Cat Eyed Snake	Reptile	1	Waning Crescent (2.7% Full)	Dark	Dry	7:30 - 10:00	No Record	No Record	2.5
January	2012	2012-01-22	Leptodeira septentrionalis	Northern Cat Eyed Snake	Reptile	2	Waning Crescent (1.9% Full)	Dark	Dry	6:00 - 8:00	No Record	No Record	2
January	2012	2012-01-22	Leptodeira septentrionalis	Northern Cat Eyed Snake	Reptile	1	Waning Crescent (1.9% Full)	Dark	Dry	8:00 - 10:00	No Record	No Record	2
January	2012	2012-01-24	Imantodes cenchoa	Chunk-headed Snake	Reptile	1	Waxing Crescent (2.5% Full)	Dark	Dry	7:30 - 10:30	No Record	No Record	3
January	2012	2012-01-25	Imantodes cenchoa	Chunk-headed Snake	Reptile	1	Waxing Crescent (3.5% Full)	Dark	Dry	7:30 - 10:00	No Record	No Record	2.5
January	2012	2012-01-25	Leptodeira septentrionalis	Northern Cat Eyed Snake	Reptile	1	Waxing Crescent (3.5% Full)	Dark	Dry	7:30 - 10:00	No Record	No Record	2.5
January	2012	2012-01-26	Enuliophis sclateri	Sock-headed Snake	Reptile	1	Waxing Crescent (13.1% Full)	Dark	Dry	8:00 - 10:00	No Record	No Record	0
January	2012	2012-01-26	Leptodeira septentrionalis	Northern Cat Eyed Snake	Reptile	2	Waxing Crescent (13.1% Full)	Dark	Dry	8:00 - 10:00	No Record	No Record	2
January	2012	2012-01-28	Leptodeira septentrionalis	Northern Cat Eyed Snake	Reptile	4	Waxing Crescent (28% Full)	Dark	Dry	7:30 - 10:00	No Record	No Record	2.5
January	2012	2012-01-30	Leptodeira septentrionalis	Northern Cat Eyed Snake	Reptile	4	First Quarter (46.9% full)	Dark	Dry	7:30 - 10:00	No Record	No Record	2.5
February	2012	2012-02-02	Leptodeira septentrionalis	Northern Cat Eyed Snake	Reptile	1	Waxing Gibbous (73.7% full)	Semi-bright	Dry	8:00 - 10:00	No Record	No Record	2
February	2012	2012-02-03	Imantodes cenchoa	Chunk-headed Snake	Reptile	1	Waxing Gibbous (82.2% full)	Semi-bright	Dry	7:45 - 10:00	No Record	No Record	2.25
February	2012	2012-02-04	Leptodeira septentrionalis	Northern Cat Eyed Snake	Reptile	1	Waxing Gibbous (89.4% full)	Semi-bright	Dry	7:00 - 9:45	No Record	No Record	2.75
February	2012	2012-02-06	Leptodeira septentrionalis	Northern Cat Eyed Snake	Reptile	1	Waxing Gibbous (97.8% full)	Bright	Dry	7:30 - 10:00	No Record	No Record	2.5
February	2012	2012-02-06	Sibon nebulatus	Common Snaileater	Reptile	1	Waxing Gibbous (97.8% full)	Bright	Dry	7:30 - 10:00	No Record	No Record	0
February	2012	2012-02-07	Leptodeira septentrionalis	Northern Cat Eyed Snake	Reptile	1	Full Moon (100% Full)	Bright	Dry	7:30 - 10:20	No Record	No Record	3
February	2012	2012-02-09	Imantodes cenchoa	Chunk-headed Snake	Reptile	2	Waning Gibbous (94.3% Full)	Semi-bright	Dry	7:30 - 11:00	No Record	No Record	3.5
February	2012	2012-02-09	Leptodeira septentrionalis	Northern Cat Eyed Snake	Reptile	1	Waning Gibbous (94.3% Full)	Semi-bright	Dry	7:30 - 11:00	No Record	No Record	0
February	2012	2012-02-10	Imantodes cenchoa	Chunk-headed Snake	Reptile	1	Waning Gibbous (87.8% Full)	Semi-bright	Dry	7:30 - 10:00	No Record	No Record	0
February	2012	2012-02-10	Leptodeira septentrionalis	Northern Cat Eyed Snake	Reptile	1	Waning Gibbous (87.8% Full)	Semi-bright	Dry	7:30 - 10:00	No Record	No Record	2.5
February	2012	2012-02-11	Leptodeira septentrionalis	Northern Cat Eyed Snake	Reptile	1	Waning Gibbous (84.9% Full)	Semi-bright	Dry	7:30 - 10:00	No Record	No Record	0
February	2012	2012-02-11	Mastigodryas melanolomus	Neotropical Racer	Reptile	1	Waning Gibbous (84.9% Full)	Semi-bright	Dry	7:30 - 10:00	No Record	No Record	2.5
February	2012	2012-02-12	Imantodes cenchoa	Chunk-headed Snake	Reptile	1	Waning Gibbous (71.5% Full)	Dark	Dry	8:00 - 10:30	No Record	No Record	0
February	2012	2012-02-12	Leptodeira septentrionalis	Northern Cat Eyed Snake	Reptile	1	Waning Gibbous (71.5% Full)	Dark	Dry	8:00 - 10:30	No Record	No Record	2.5
February	2012	2012-02-13	Leptodeira septentrionalis	Northern Cat Eyed Snake	Reptile	3	Waning Gibbous (57.7% Full)	Dark	Dry	7:30 - 10:00	No Record	No Record	2.5
February	2012	2012-02-14	Leptodeira septentrionalis	Northern Cat Eyed Snake	Reptile	1	Waning Gibbous (53% Full)	Dark	Dry	8:00 - 10:00	No Record	No Record	2
February	2012	2012-02-15	Imantodes cenchoa	Chunk-headed Snake	Reptile	1	Waning Gibbous (42.5% Full)	Dark	Dry	6:00 - 8:00	No Record	No Record	2
February	2012	2012-02-15	Leptodeira septentrionalis	Northern Cat Eyed Snake	Reptile	1	Waning Gibbous (42.5% Full)	Dark	Dry	6:00 - 8:00	No Record	No Record	0
February	2012	2012-02-15	Leptodeira septentrionalis	Northern Cat Eyed Snake	Reptile	3	Waning Gibbous (42.5% Full)	Dark	Dry	8:00 - 10:00	No Record	No Record	2
February	2012	2012-02-16	Imantodes cenchoa	Chunk-headed Snake neonate	Reptile	1	Waning Gibbous (31.8% Full)	Dark	Dry	7:30 - 10:30	No Record	No Record	0
February	2012	2012-02-16	Leptodeira septentrionalis	northern Cat Eyed Snake neonate	Reptile	1	Waning Gibbous (31.8% Full)	Dark	Dry	7:30 - 10:30	No Record	No Record	3
February	2012	2012-02-18	Imantodes cenchoa	Chunk-headed Snake	Reptile	1	Waning Gibbous (10.7% Full)	Dark	Dry	7:30 - 10:00	No Record	No Record	0
February	2012	2012-02-18	Leptodeira septentrionalis	northern Cat Eyed Snake	Reptile	1	Waning Gibbous (10.7% Full)	Dark	Dry	7:30 - 10:00	No Record	No Record	2.5
February	2012	2012-02-19	Imantodes cenchoa	Chunk-headed Snake	Reptile	2	Waning Gibbous (6.2% Full)	Dark	Dry	6:00 - 8:00	No Record	No Record	2
February	2012	2012-02-20	Imantodes cenchoa	Chunk-headed Snake	Reptile	1	Waning Gibbous (1.5% Full)	Dark	Dry	8:00 - 10:00	No Record	No Record	2
February	2012	2012-02-21	Leptodeira septentrionalis	Northern Cat-eyed Snake	Reptile	2	New Moon (0.3% Full)	Dark	Dry	5:45 - 7:30	No Record	No Record	2.75
February	2012	2012-02-21	Imantodes cenchoa	Chunk-headed Snake neonate	Reptile	1	New Moon (0.3% Full)	Dark	Dry	7:30 - 10:00	No Record	No Record	2.5
February	2012	2012-02-22	Leptodeira septentrionalis	Northern Cat-eyed Snake	Reptile	2	Waxing Crescent (0.6% Full)	Dark	Dry	7:30 - 10:00	No Record	No Record	2.5
February	2012	2012-02-23	Leptodeira septentrionalis	Northern Cat-eyed Snake	Reptile	1	Waxing Crescent (2.2% Full)	Dark	Dry	8:00 - 10:00	No Record	No Record	2
February	2012	2012-02-25	Enuliophis sclateri	Sock-headed Snake	Reptile	1	Waxing Crescent (12.8% Full)	Dark	Dry	8:00 - 10:30	No Record	No Record	2.5
February	2012	2012-02-26	Leptodeira septentrionalis	Northern Cat-eyed Snake	Reptile	1	Waxing Crescent (21.5% Full)	Dark	Dry	8:00 - 10:00	No Record	No Record	2
February	2012	2012-02-27	Imantodes cenchoa	Chunk-headed Snake	Reptile	1	Waxing Crescent (28.2% Full)	Dark	Dry	7:30 - 10:30	No Record	No Record	3
February	2012	2012-02-27	Leptodeira septentrionalis	Northern Cat-eyed Snake	Reptile	1	Waxing Crescent (28.2% Full)	Dark	Dry	7:30 - 10:30	No Record	No Record	0
February	2012	2012-02-28	Leptodeira septentrionalis	Northern Cat-eyed Snake	Reptile	1	Waxing Crescent (34.7% Full)	Dark	Dry	8:00 - 10:00	No Record	No Record	2
February	2012	2012-02-29	Imantodes cenchoa	Chunk-headed Snake	Reptile	1	First Quarter (43.9% Full)	Dark	Dry	7:30 - 10:30	No Record	No Record	3
February	2012	2012-02-29	Leptophis ahaetulla	Giant Parrot Snake	Reptile	1	First Quarter (43.9% Full)	Dark	Dry	7:30 - 10:30	No Record	No Record	0
March	2012	2012-03-02	Phrynonax poecilonotus	Neotropical Bird Snake	Reptile	1	Waxing Gibbous (63.1% Full)	Semi-bright	Dry	8:00 - 10:00	No Record	No Record	2
March	2012	2012-03-03	Enuliophis sclateri	Sock-headed Snake	Reptile	1	Waxing Gibbous (72.2% Full)	Bright	Dry	7:30 - 10:00	No Record	No Record	2.5
March	2012	2012-03-03	Imantodes cenchoa	Chunk-headed Snake	Reptile	1	Waxing Gibbous (72.2% Full)	Bright	Dry	7:30 - 10:00	No Record	No Record	0
March	2012	2012-03-04	Imantodes cenchoa	Chunk-headed Snake	Reptile	2	Waxing Gibbous (80.9% Full)	Bright	Dry	8:00 - 10:00	No Record	No Record	2
March	2012	2012-03-04	Leptodeira septentrionalis	Northern Cat-eyed Snake	Reptile	1	Waxing Gibbous (80.9% Full)	Bright	Dry	8:00 - 10:00	No Record	No Record	0
March	2012	2012-03-05	Imantodes cenchoa	Chunk-headed Snake	Reptile	1	Waxing Gibbous (88.7% Full)	Bright	Dry	7:30 - 10:00	No Record	No Record	2.5
March	2012	2012-03-12	Imantodes cenchoa	Chunk-headed Snake	Reptile	1	Waning Gibbous (79% Full)	Dark	Dry	6:00 - 8:00	No Record	No Record	0
March	2012	2012-03-12	Leptodeira septentrionalis	Northern Cat-eyed Snake	Reptile	1	Waning Gibbous (79% Full)	Dark	Dry	6:00 - 8:00	No Record	No Record	2
March	2012	2012-03-12	Imantodes cenchoa	Chunk-headed Snake	Reptile	1	Waning Gibbous (79% Full)	Dark	Dry	7:30 - 10:00	No Record	No Record	0
March	2012	2012-03-12	Leptodeira septentrionalis	Northern Cat-eyed Snake	Reptile	2	Waning Gibbous (79% Full)	Dark	Dry	7:30 - 10:00	No Record	No Record	2.5
March	2012	2012-03-14	Enuliophis sclateri	Sock-headed Snake	Reptile	1	Last Quarter (54.1% Full)	Dark	Dry	8:00 - 10:00	No Record	No Record	2
March	2012	2012-03-14	Leptodeira septentrionalis	Northern Cat-eyed Snake	Reptile	1	Last Quarter (54.1% Full)	Dark	Dry	8:00 - 10:00	No Record	No Record	0
March	2012	2012-03-15	Leptodeira septentrionalis	Northern Cat-eyed Snake	Reptile	1	Waning Crescent (46.5% Full)	Dark	Dry	6:00 - 8:00	No Record	No Record	2
March	2012	2012-03-15	Leptodeira septentrionalis	Northern Cat-eyed Snake	Reptile	2	Waning Crescent (46.5% Full)	Dark	Dry	8:00 - 10:15	No Record	No Record	2.25
March	2012	2012-03-16	Leptophis ahaetulla	Giant Parrot Snake	Reptile	1	Waning Crescent (35.6% Full)	Dark	Dry	7:30 - 10:00	No Record	No Record	2.5
March	2012	2012-03-18	Leptodeira septentrionalis	Northern Cat-eyed Snake	Reptile	1	Waning Crescent (17% Full)	Dark	Dry	7:30 10:00	No Record	No Record	2.5
March	2012	2012-03-19	Leptodeira septentrionalis	Northern Cat-eyed Snake (neonate)	Reptile	1	Waning Crescent (10.3% Full)	Dark	Dry	8:00 - 10:00	No Record	No Record	2
March	2012	2012-03-19	Leptodeira septentrionalis	Northern Cat-eyed Snake	Reptile	1	Waning Crescent (10.3% Full)	Dark	Dry	8:00 - 10:00	No Record	No Record	0
March	2012	2012-03-20	Leptodeira septentrionalis	Northern Cat-eyed Snake	Reptile	1	Waning Crescent (3.7% Full)	Dark	Light Rain	7:30 - 10:00	No Record	No Record	2.5
March	2012	2012-03-22	Leptodeira septentrionalis	Northern Cat-eyed Snake	Reptile	1	New Moon (0 % Full)	Dark	Dry	8:00 - 10:00	No Record	No Record	2
March	2012	2012-03-30	Leptodeira septentrionalis	Northern Cat-eyed Snake	Reptile	2	First Quarter (50.1% Full)	Dark	Dry	8:00 - 10:30	No Record	No Record	2.5
March	2012	2012-03-31	Leptodeira septentrionalis	Northern Cat-eyed Snake	Reptile	3	Waxing Gibbous (55.9% Full)	Dark	Dry	8:00 - 10:00	No Record	No Record	2
April	2012	2012-04-01	Stenorrhina degenhardtii	Southern Sorpion Eater	Reptile	1	Waxing Gibbous (69.5% Full)	Semi-bright	Dry	6:00 - 8:00	No Record	No Record	2
April	2012	2012-04-02	Imantodes cenchoa	Chunk-headed Snake	Reptile	1	Waxing Gibbous (77.2% Full)	Semi-bright	Dry	6:00 - 8:00	No Record	No Record	2
April	2012	2012-04-02	Leptodeira septentrionalis	Northern Cat-eyed Snake	Reptile	1	Waxing Gibbous (77.2% Full)	Semi-bright	Dry	6:00 - 8:00	No Record	No Record	0
April	2012	2012-04-02	Imantodes cenchoa	Chunk-headed Snake	Reptile	1	Waxing Gibbous (77.2% Full)	Semi-bright	Dry	8:00 - 10:00	No Record	No Record	2
April	2012	2012-04-02	Siphlophis compressus	Red-eyed Tree Snake	Reptile	1	Waxing Gibbous (77.2% Full)	Semi-bright	Dry	8:00 - 10:00	No Record	No Record	0
April	2012	2012-04-03	Dendrophidion percarinatum	Barred Forest Racer	Reptile	1	Waxing Gibbous (87.6% Full)	Semi-bright	Dry	7:30 - 10:00	No Record	No Record	2.5
April	2012	2012-04-03	Mastigodryas melanolomus	Neotropical Racer	Reptile	1	Waxing Gibbous (87.6% Full)	Semi-bright	Dry	7:30 - 10:00	No Record	No Record	0
April	2012	2012-04-05	Imantodes cenchoa	Chunk-headed Snake	Reptile	1	Waxing Gibbous (98.1% Full)	Bright	Dry	6:00 - 8:00	No Record	No Record	0
April	2012	2012-04-05	Leptodeira septentrionalis	Northern Cat-eyed Snake	Reptile	1	Waxing Gibbous (98.1% Full)	Bright	Dry	6:00 - 8:00	No Record	No Record	2
April	2012	2012-04-05	Leptodeira septentrionalis	Northern Cat-eyed Snake	Reptile	1	Waxing Gibbous (98.1% Full)	Bright	Dry	7:45 - 10:00	No Record	No Record	2.25
April	2012	2012-04-06	Enuliophis sclateri	Sock-headed Snake	Reptile	1	Full Moon (100% Full)	Bright	Dry	8:00 - 10:30	No Record	No Record	0
April	2012	2012-04-06	Leptodeira septentrionalis	Northern Cat-eyed Snake	Reptile	1	Full Moon (100% Full)	Bright	Dry	8:00 - 10:30	No Record	No Record	2.5
April	2012	2012-04-07	Imantodes cenchoa	Chunk-headed Snake	Reptile	1	Waning Gibbous (99.4% Full)	Dark	Light Rain	5:50 - 7:30	No Record	No Record	1.5
April	2012	2012-04-07	Imantodes cenchoa	Chunk-headed Snake	Reptile	1	Waning Gibbous (99.4% Full)	Semi-bright	Dry	7:30 - 10:00	No Record	No Record	0
April	2012	2012-04-07	Leptodeira septentrionalis	Northern Cat-eyed Snake	Reptile	2	Waning Gibbous (99.4% Full)	Semi-bright	Dry	7:30 - 10:00	No Record	No Record	2.5
April	2012	2012-04-08	Leptodeira septentrionalis	Northern Cat-eyed Snake	Reptile	1	Waning Gibbous (95.9% Full)	Dark	Light Rain	6:00 - 8:00	No Record	No Record	2
April	2012	2012-04-08	Leptophis nebulosus	Yellow-lipped Parrot Snake	Reptile	1	Waning Gibbous (95.9% Full)	Dark	Light Rain	6:00 - 8:00	No Record	No Record	0
April	2012	2012-04-08	Leptodeira septentrionalis	Northern Cat-eyed Snake	Reptile	1	Waning Gibbous (95.9% Full)	Semi-bright	Dry	8:00 - 10:00	No Record	No Record	2
April	2012	2012-04-08	Leptophis nebulosus	Yellow-lipped Parrot Snake	Reptile	1	Waning Gibbous (95.9% Full)	Semi-bright	Dry	8:00 - 10:00	No Record	No Record	0
April	2012	2012-04-09	Imantodes cenchoa	Chunk-headed Snake	Reptile	1	Waning Gibbous (90% Full)	Dark	Dry	7:30 - 10:00	No Record	No Record	2.5
April	2012	2012-04-11	Imantodes cenchoa	Chunk-headed Snake	Reptile	1	Waning Gibbous (69.2% Full)	Dark	Dry	6:00 - 8:00	No Record	No Record	0
April	2012	2012-04-11	Leptodeira septentrionalis	Northern Cat-eyed Snake	Reptile	1	Waning Gibbous (69.2% Full)	Dark	Dry	6:00 - 8:00	No Record	No Record	2
April	2012	2012-04-11	Leptodeira septentrionalis	Northern Cat-eyed Snake	Reptile	1	Waning Gibbous (69.2% Full)	Dark	Dry	8:00 - 10:00	No Record	No Record	2
April	2012	2012-04-12	Imantodes cenchoa	Chunk-headed Snake	Reptile	1	Waning Gibbous (56.4% Full)	Dark	Dry	8:00 - 10:00	No Record	No Record	0
April	2012	2012-04-12	Leptodeira septentrionalis	Northern Cat-eyed Snake	Reptile	1	Waning Gibbous (56.4% Full)	Dark	Dry	8:00 - 10:00	No Record	No Record	2
April	2012	2012-04-12	Mastigodryas melanolomus	Neotropical Racer	Reptile	1	Waning Gibbous (56.4% Full)	Dark	Dry	8:00 - 10:00	No Record	No Record	0
April	2012	2012-04-16	Imantodes cenchoa	Chunk-headed Snake	Reptile	1	Waning Crescent (18.9% Full)	Dark	Dry	7:30 - 10:00	No Record	No Record	2.5
April	2012	2012-04-16	Leptodeira septentrionalis	Northern Cat-eyed Snake	Reptile	2	Waning Crescent (18.9% Full)	Dark	Dry	7:30 - 10:00	No Record	No Record	0
April	2012	2012-04-17	Phrynonax poecilonotus	Neotropical (Northern) Bird Snake	Reptile	1	Waning Crescent (16.1% Full)	Dark	Dry	8:00 - 10:00	No Record	No Record	2
April	2012	2012-04-18	Leptodeira septentrionalis	Northern Cat-eyed Snake	Reptile	1	Waning Crescent (7.7% Full)	Dark	Dry	7:30 - 10:30	No Record	No Record	0
April	2012	2012-04-19	Leptodeira septentrionalis	Northern Cat-eyed Snake	Reptile	1	Waning Crescent (3.4% Full)	Dark	Dry	7:30 - 10:30	No Record	No Record	0
April	2012	2012-04-19	Siphlophis compressus	Red-eyed Tree Snake	Reptile	1	Waning Crescent (3.4% Full)	Dark	Dry	7:30 - 10:30	No Record	No Record	2.5
April	2012	2012-04-20	Leptodeira septentrionalis	Northern Cat-eyed Snake	Reptile	1	Waning Crescent (0.5% Full)	Dark	Dry	7:30 - 10:00	No Record	No Record	2.5
April	2012	2012-04-21	Leptodeira septentrionalis	Northern Cat-eyed Snake	Reptile	2	New Moon (0.0% Full)	Dark	Dry	8:00 - 10:00	No Record	No Record	2
April	2012	2012-04-23	Imantodes cenchoa	Chunk-headed Snake	Reptile	1	Waxing Crescent (4.5% Full)	Dark	Light Rain	7:30 - 10:00	No Record	No Record	0
April	2012	2012-04-23	Leptodeira septentrionalis	Northern Cat-eyed Snake	Reptile	1	Waxing Crescent (4.5% Full)	Dark	Light Rain	7:30 - 10:00	No Record	No Record	2.5
April	2012	2012-04-24	Leptodeira septentrionalis	Northern Cat-eyed Snake	Reptile	1	Waxing Crescent (10.3% Full)	Dark	Light Rain	7:30 - 10:30	No Record	No Record	3
April	2012	2012-04-25	Boa imperator	Boa Constrictor	Reptile	1	Waxing Crescent (18.9% Full)	Dark	Light Rain	7:30 - 10:15	No Record	No Record	0
April	2012	2012-04-25	Leptodeira septentrionalis	Northern Cat-eyed Snake	Reptile	4	Waxing Crescent (18.9% Full)	Dark	Light Rain	7:30 - 10:15	No Record	No Record	2.75
April	2012	2012-04-26	Leptodeira septentrionalis	Northern Cat-eyed Snake	Reptile	3	Waxing Crescent (27.1% Full)	Dark	Dry	5:45 - 7:45	No Record	No Record	2
April	2012	2012-04-29	Enuliophis sclateri	Sock-headed Snake	Reptile	2	First Quarter (53.2% Full)	Dark	Dry	7:30 - 10:15	No Record	No Record	2.75
April	2012	2012-04-29	Imantodes cenchoa	Chunk-headed Snake	Reptile	1	First Quarter (53.2% Full)	Dark	Dry	7:30 - 10:15	No Record	No Record	0
April	2012	2012-04-29	Leptodeira septentrionalis	Northern Cat-eyed Snake	Reptile	1	First Quarter (53.2% Full)	Dark	Dry	7:30 - 10:15	No Record	No Record	0
April	2012	2012-04-30	Imantodes cenchoa	Chunk-headed Snake	Reptile	1	Waxing Gibbous (56.8% Full)	Dark	Light Rain	8:00 - 10:00	No Record	No Record	0
April	2012	2012-04-30	Leptodeira septentrionalis	Northern Cat-eyed Snake	Reptile	1	Waxing Gibbous (56.8% Full)	Dark	Light Rain	8:00 - 10:00	No Record	No Record	2
April	2012	2012-04-30	Leptodeira septentrionalis	Northern Cat-eyed Snake	Reptile	1	Waxing Gibbous (56.8% Full)	Dark	Light Rain	8:00 - 10:00	No Record	No Record	0
May	2012	2012-05-02	Leptodeira septentrionalis	Northern Cat-eyed Snake	Reptile	2	Waxing Gibbous (80.8% Full)	Bright	Dry	7:30 - 10:30	14:33:00	No Record	3
May	2012	2012-05-02	Leptophis ahaetulla	Giant Parrot Snake	Reptile	1	Waxing Gibbous (80.8% Full)	Bright	Dry	7:30 - 10:30	14:33:00	No Record	0
May	2012	2012-05-03	Enuliophis sclateri	Sock-headed Snake	Reptile	1	Waxing Gibbous (88.7% Full)	Bright	Light Rain	7:30 - 10:30	15:30:00	No Record	0
May	2012	2012-05-03	Leptodeira septentrionalis	Northern Cat-eyed Snake	Reptile	1	Waxing Gibbous (88.7% Full)	Bright	Light Rain	7:30 - 10:30	15:30:00	No Record	3
May	2012	2012-05-07	Leptodeira septentrionalis	Northern Cat-eyed Snake	Reptile	2	Waning Gibbous (97.6% Full)	Semi-bright	Dry	8:00 - 10:00	19:39:00	No Record	2
May	2012	2012-05-09	Enuliophis sclateri	Sock-headed Snake	Reptile	1	Waning Gibbous (85.2% Full)	Dark	Dry	7:30 - 10:30	21:39:00	No Record	3
May	2012	2012-05-12	Leptodeira septentrionalis	Northern Cat-eyed Snake	Reptile	2	Last Quater (50.7% Full)	Dark	Dry	8:00 - 10:00	00:09:00	No Record	2
May	2012	2012-05-16	Enuliophis sclateri	Sock-headed Snake	Reptile	1	Waning Crescent (14.8% Full)	Dark	Dry	8:00 - 10:00	02:45:00	No Record	0
May	2012	2012-05-16	Imantodes cenchoa	Chunk-headed Snake	Reptile	1	Waning Crescent (14.8% Full)	Dark	Dry	8:00 - 10:00	02:45:00	No Record	2
May	2012	2012-05-20	Hydrophis platurus	Pelagic Sea Snake	Reptile	1	New Moon (0.0% Full)	Dark	Rainy	8:00 - 10:30	05:41:00	No Record	2.5
May	2012	2012-05-20	Leptodeira septentrionalis	Northern Cat-eyed Snake	Reptile	1	New Moon (0.0% Full)	Dark	Rainy	8:00 - 10:30	05:41:00	No Record	0
May	2012	2012-05-24	Leptodeira septentrionalis	Northern Cat-eyed Snake	Reptile	1	Waxing Crescent (12.0% Full)	Dark	Light Rain	7:30 - 10:30	08:09:00	No Record	3
May	2012	2012-05-26	Leptodeira septentrionalis	Northern Cat-eyed Snake	Reptile	2	Waxing Crescent (27.4% Full)	Dark	Dry	8:00 - 10:00	09:50:00	No Record	2
May	2012	2012-05-28	Enuliophis sclateri	Sock-headed Snake	Reptile	1	First Quarter (45.7% Full)	Dark	Dry	8:00 - 10:00	11:31:00	No Record	0
May	2012	2012-05-28	Leptodeira septentrionalis	Northern Cat-eyed Snake	Reptile	1	First Quarter (45.7% Full)	Dark	Dry	8:00 - 10:00	11:31:00	No Record	2
May	2012	2012-05-29	Leptodeira septentrionalis	Northern Cat-eyed Snake	Reptile	2	Waxing Gibbous (56.3% Full)	Dark	Dry	7:30 - 10:00	12:22:00	No Record	2.5
May	2012	2012-05-31	Imantodes cenchoa	Chunk-headed Snake	Reptile	1	Waxing Gibbous (77.4% Full)	Semi-bright	Dry	7:30 - 10:30	14:12:00	No Record	0
May	2012	2012-05-31	Leptodeira septentrionalis	Northern Cat-eyed Snake	Reptile	1	Waxing Gibbous (77.4% Full)	Semi-bright	Dry	7:30 - 10:30	14:12:00	No Record	3
June	2012	2012-06-01	Leptodeira septentrionalis	Northern Cat-eyed Snake	Reptile	1	Waxing Gibbous (86.3% Full)	Semi-bright	Dry	7:30 - 10:15	15:14:00	No Record	2.75
June	2012	2012-06-02	Boa imperator	Boa constrictor	Reptile	1	Waxing Gibbous (95.3% Full)	Semi-bright	Dry	7:30 - 10:30	16:17:00	No Record	3
June	2012	2012-06-02	Imantodes cenchoa	Chunk-headed Snake	Reptile	2	Waxing Gibbous (95.3% Full)	Semi-bright	Dry	7:30 - 10:30	16:17:00	No Record	0
June	2012	2012-06-04	Imantodes cenchoa	Chunk-headed Snake	Reptile	2	Full Moon (100% Full)	Semi-bright	Light Rain	8:00 - 10:15	18:25:00	No Record	0
June	2012	2012-06-04	Leptodeira septentrionalis	Northern Cat-eyed Snake	Reptile	1	Full Moon (100% Full)	Semi-bright	Light Rain	8:00 - 10:15	18:25:00	No Record	2.25
June	2012	2012-06-07	Leptodeira septentrionalis	Northern Cat-eyed Snake	Reptile	1	Waning Gibbous (84.8% Full)	Dark	Dry	7:30 - 10:15	21:14:00	No Record	2.75
June	2012	2012-06-08	Leptodeira septentrionalis	Northern Cat-eyed Snake	Reptile	1	Waning Gibbous (79.8% Full)	Dark	Dry	6:00 - 8:00	22:01:00	No Record	2
June	2012	2012-06-10	Siphlophis compressus	Red-eyed Tree Snake	Reptile	1	Waning Gibbous (60.5% Full)	Dark	Rainy	8:00 - 10:40	23:25:00	No Record	2.75
June	2012	2012-06-11	Imantodes cenchoa	Chunk-headed Snake	Reptile	1	Last Quarter (50.4% Full)	Dark	Light Rain	7:30 - 10:30	23:48:00	No Record	3
June	2012	2012-06-11	Mastigodryas melanolomus	Neotropical Racer	Reptile	1	Last Quarter (50.4% Full)	Dark	Light Rain	7:30 - 10:30	23:48:00	No Record	0
June	2012	2012-06-17	Imantodes cenchoa	Chunk-headed Snake	Reptile	1	Waning Crescent (3.7% Full)	Dark	Light Rain	8:00 - 10:00	03:36:00	No Record	0
June	2012	2012-06-17	Leptodeira septentrionalis	Northern Cat-eyed Snake	Reptile	1	Waning Crescent (3.7% Full)	Dark	Light Rain	8:00 - 10:00	03:36:00	No Record	2
June	2012	2012-06-18	Enuliophis sclateri	Sock-headed Snake	Reptile	2	Waning Crescent (1.4% Full)	Dark	Dry	8:00 - 10:00	04:24:00	No Record	0
June	2012	2012-06-18	Leptodeira septentrionalis	Northern Cat-eyed Snake	Reptile	1	Waning Crescent (1.4% Full)	Dark	Dry	8:00 - 10:00	04:24:00	No Record	2
June	2012	2012-06-21	Leptodeira septentrionalis	Northern Cat-eyed Snake	Reptile	1	Waxing Crescent (3.2% Full)	Dark	Dry	7:30 - 10:30	06:56:00	No Record	3
June	2012	2012-06-22	Imantodes cenchoa	Chunk-headed Snake	Reptile	1	Waxing Crescent (7.6% Full)	Dark	Dry	8:00 - 10:15	07:04:00	No Record	2.25
June	2012	2012-06-24	Leptodeira septentrionalis	Northern Cat-eyed Snake	Reptile	2	Waxing Crescent (21.7% Full)	Dark	Dry	7:30 - 10:30	09:29:00	No Record	3
June	2012	2012-06-26	Leptodeira septentrionalis	Northern Cat-eyed Snake	Reptile	1	First Quarter (46.3% Full)	Dark	Dry	6:00 - 8:00	11:12:00	No Record	2
June	2012	2012-06-26	Leptodeira septentrionalis	Northern Cat-eyed Snake	Reptile	1	First Quarter (46.3% Full)	Dark	Dry	8:00 - 10:00	11:12:00	No Record	2
June	2012	2012-06-27	Leptodeira septentrionalis	Northern Cat-eyed Snake	Reptile	1	Waxing Gibbous (57.6% Full)	Dark	Dry	7:30 - 10:00	12:06:00	No Record	2.5
July	2012	2012-07-01	Leptodeira septentrionalis	Northern Cat-eyed Snake	Reptile	1	Waxing Gibbous (94.7% Full)	Bright	Dry	7:30 - 10:30	16:06:00	No Record	3
July	2012	2012-07-03	Leptodeira septentrionalis	Northern Cat-eyed Snake	Reptile	1	Full Moon (99.8% Full)	Bright	Light Rain	7:45 - 10:00	18:06:00	No Record	2.25
July	2012	2012-07-04	Leptodeira septentrionalis	Northern Cat-eyed Snake	Reptile	2	Waning Gibbous (97.8% Full)	Dark	Rainy	8:00 - 10:00	19:01:00	No Record	2
July	2012	2012-07-05	Leptodeira septentrionalis	Northern Cat-eyed Snake	Reptile	1	Waning Gibbous (95.4% Full)	Dark	Rainy	7:30 - 10:00	19:51:00	No Record	2.5
July	2012	2012-07-06	Bothriechis schlegelii	Eyelash Viper	Reptile	1	Waning Gibbous (90.7% Full)	Dark	Dry	7:30 - 10:30	20:37:00	No Record	0
July	2012	2012-07-06	Leptodeira septentrionalis	Northern Cat-eyed Snake	Reptile	3	Waning Gibbous (90.7% Full)	Dark	Dry	7:30 - 10:30	20:37:00	No Record	3
July	2012	2012-07-07	Boa imperator	Boa constrictor	Reptile	1	Waning Gibbous (83.6% Full)	Dark	Dry	7:30 - 10:30	21:20:00	No Record	3
July	2012	2012-07-08	Leptodeira septentrionalis	Northern Cat-eyed Snake	Reptile	1	Waning Gibbous (75.3% Full)	Dark	Dry	7:30 - 10:30	22:01:00	No Record	3
July	2012	2012-07-09	Enuliophis sclateri	Sock-headed Snake	Reptile	1	Waning Gibbous (65.9% Full)	Dark	Rainy	7:30 - 10:30	22:42:00	No Record	3
July	2012	2012-07-09	Leptodeira septentrionalis	Northern Cat-eyed Snake	Reptile	1	Waning Gibbous (65.9% Full)	Dark	Rainy	7:30 - 10:30	22:42:00	No Record	0
July	2012	2012-07-10	Clelia clelia	Mussurana	Reptile	1	Last Quarter (56.6% Full)	Dark	Dry	8:00 - 10:00	23:22:00	No Record	0
July	2012	2012-07-10	Leptodeira septentrionalis	Northern Cat-eyed Snake	Reptile	1	Last Quarter (56.6% Full)	Dark	Dry	8:00 - 10:00	23:22:00	No Record	2
July	2012	2012-07-11	Leptodeira septentrionalis	Northern Cat-eyed Snake	Reptile	1	Waning Crescent (40.9% Full)	Dark	Light Rain	7:30 - 10:00	-	No Record	2.5
July	2012	2012-07-12	Imantodes cenchoa	Chunk-headed Snake	Reptile	1	Waning Crescent (37.4% Full)	Dark	Light Rain	7:30 - 10:30	00:04:00	No Record	3
July	2012	2012-07-12	Leptodeira septentrionalis	Northern Cat-eyed Snake	Reptile	2	Waning Crescent (37.4% Full)	Dark	Light Rain	7:30 - 10:30	00:04:00	No Record	0
July	2012	2012-07-15	Imantodes cenchoa	Chunk-headed Snake	Reptile	1	Waning Crescent (13.3% Full)	Dark	Dry	7:30 - 10:30	02:19:00	No Record	3
July	2012	2012-07-16	Bothriechis schlegelii	Eyelash Viper	Reptile	1	Waning Crescent (5.4% Full)	Dark	Dry	7:30 - 10:30	03:08:00	No Record	3
July	2012	2012-07-16	Leptodeira septentrionalis	Northern Cat-eyed Snake	Reptile	2	Waning Crescent (5.4% Full)	Dark	Dry	7:30 - 10:30	03:08:00	No Record	0
July	2012	2012-07-19	Dendrophidion percarinatum	Barred Forest Racer	Reptile	1	Waxing Crescent (0.2% Full)	Dark	Dry	8:00 - 10:00	05:42:00	No Record	0
July	2012	2012-07-19	Leptodeira septentrionalis	Northern Cat-eyed Snake	Reptile	1	Waxing Crescent (0.2% Full)	Dark	Dry	8:00 - 10:00	05:42:00	No Record	2
July	2012	2012-07-20	Leptodeira septentrionalis	Northern Cat-eyed Snake	Reptile	1	Waxing Crescent (1.7% Full)	Dark	Dry	7:30 - 10:00	06:34:00	No Record	2.5
July	2012	2012-07-20	Leptodeira septentrionalis	Northern Cat-eyed Snake	Reptile	2	Waxing Crescent (1.7% Full)	Dark	Dry	7:30 - 10:00	06:34:00	No Record	0
July	2012	2012-07-21	Enuliophis sclateri	Sock-headed Snake	Reptile	1	Waxing Crescent (5.4% Full)	Dark	Dry	8:00 - 10:00	07:25:00	No Record	0
July	2012	2012-07-21	Leptodeira septentrionalis	Northern Cat-eyed Snake	Reptile	2	Waxing Crescent (5.4% Full)	Dark	Dry	8:00 - 10:00	07:25:00	No Record	2
July	2012	2012-07-22	Leptodeira septentrionalis	Northern Cat-eyed Snake	Reptile	1	Waxing Crescent (11.3% Full)	Dark	Light Rain	5:45 - 7:40	08:17:00	No Record	2
July	2012	2012-07-22	Imantodes cenchoa	Chunk-headed Snake	Reptile	1	Waxing Crescent (11.3% Full)	Dark	Dry	7:30 - 10:30	08:17:00	No Record	0
July	2012	2012-07-22	Leptodeira septentrionalis	Northern Cat-eyed Snake	Reptile	1	Waxing Crescent (11.3% Full)	Dark	Dry	7:30 - 10:30	08:17:00	No Record	3
July	2012	2012-07-22	Leptophis nebulosus	Yellow-lipped Parrot Snake	Reptile	1	Waxing Crescent (11.3% Full)	Dark	Dry	7:30 - 10:30	08:17:00	No Record	0
July	2012	2012-07-23	Leptodeira septentrionalis	Northern Cat-eyed Snake	Reptile	1	Waxing Crescent (19.2% Full)	Dark	Dry	8:00 - 10:00	09:09:00	No Record	2
July	2012	2012-07-23	Leptodeira septentrionalis	Northern Cat-eyed Snake	Reptile	2	Waxing Crescent (19.2% Full)	Dark	Dry	8:00 - 10:00	09:09:00	No Record	0
July	2012	2012-07-25	Imantodes cenchoa	Chunk-headed Snake	Reptile	1	Waxing Crescent (39.4% Full)	Dark	Dry	7:30 - 10:00	10:57:00	No Record	0
July	2012	2012-07-25	Leptodeira septentrionalis	Northern Cat-eyed Snake	Reptile	1	Waxing Crescent (39.4% Full)	Dark	Dry	7:30 - 10:00	10:57:00	No Record	2.5
July	2012	2012-07-26	Imantodes cenchoa	Chunk-headed Snake	Reptile	1	First Quarter (50.7% Full)	Dark	Dry	7:45 - 10:00	11:54:00	No Record	2.25
July	2012	2012-07-26	Leptodeira septentrionalis	Northern Cat-eyed Snake	Reptile	1	First Quarter (50.7% Full)	Dark	Dry	7:45 - 10:00	11:54:00	No Record	0
July	2012	2012-07-26	Phrynonax poecilonotus	Neotropical Birdsnake	Reptile	1	First Quarter (50.7% Full)	Dark	Dry	7:45 - 10:00	11:54:00	No Record	0
July	2012	2012-07-27	Leptodeira septentrionalis	Northern Cat-eyed Snake	Reptile	1	Waxing Gibbous (61.8% Full)	Dark	Light Rain	7:30 - 10:30	12:53:00	No Record	3
July	2012	2012-07-27	Leptodeira septentrionalis	Northern Cat-eyed Snake	Reptile	1	Waxing Gibbous (61.8% Full)	Dark	Light Rain	7:30 - 10:30	12:53:00	No Record	0
July	2012	2012-07-28	Leptodeira septentrionalis	Northern Cat-eyed Snake	Reptile	2	Waxing Gibbous (72.7% Full)	Semi-bright	Dry	8:00 - 10:00	12:50:00	No Record	2
August	2012	2012-08-01	Leptodeira septentrionalis	Northern Cat-eyed Snake	Reptile	1	Full Moon (99.8% Full)	Semi-bright	Light Rain	8:00 - 10:00	17:40:00	No Record	2
August	2012	2012-08-02	Enuliophis sclateri	Sock-headed Snake	Reptile	1	Waning Gibbous (99.0% Full)	Bright	Dry	8:00 - 10:00	18:27:00	No Record	2
August	2012	2012-08-02	Leptodeira septentrionalis	Northern Cat-eyed Snake	Reptile	1	Waning Gibbous (99.0% Full)	Bright	Dry	8:00 - 10:00	18:27:00	No Record	0
August	2012	2012-08-02	Siphlophis compressus	Red-eyed Tree Snake	Reptile	1	Waning Gibbous (99.0% Full)	Bright	Dry	8:00 - 10:00	18:27:00	No Record	0
August	2012	2012-08-03	Imantodes cenchoa	Chunk-headed Snake	Reptile	1	Waning Gibbous (98.0% Full)	Bright	Dry	8:00 - 10:00	19:12:00	No Record	0
August	2012	2012-08-03	Leptodeira septentrionalis	Northern Cat-eyed Snake	Reptile	1	Waning Gibbous (98.0% Full)	Bright	Dry	8:00 - 10:00	19:12:00	No Record	2
August	2012	2012-08-03	Siphlophis compressus	Red-eyed Tree Snake	Reptile	1	Waning Gibbous (98.0% Full)	Bright	Dry	8:00 - 10:00	19:12:00	No Record	0
August	2012	2012-08-04	Leptodeira septentrionalis	Northern Cat-eyed Snake	Reptile	1	Waning Gibbous (93.8% Full)	Dark	Dry	7:30 - 10:30	19:55:00	No Record	3
August	2012	2012-08-05	Imantodes cenchoa	Chunk-headed Snake	Reptile	1	Waning Gibbous (87.6% Full)	Dark	Light Rain	7:30 - 10:00	20:37:00	No Record	2.5
August	2012	2012-08-10	Enuliophis sclateri	Sock-headed Snake	Reptile	1	Waning Crescent (44.0% Full)	Dark	Dry	7:30 - 10:15	none	No Record	0
August	2012	2012-08-10	Leptodeira septentrionalis	Northern Cat-eyed Snake	Reptile	1	Waning Crescent (44.0% Full)	Dark	Dry	7:30 - 10:15	none	No Record	2.75
August	2012	2012-08-11	Leptodeira septentrionalis	Northern Cat-eyed Snake	Reptile	1	Waning Crescent (35.1% Full)	Dark	Light Rain	8:00 - 10:00	00:13:00	No Record	2
August	2012	2012-08-11	Siphlophis compressus	Red-eyed Tree Snake	Reptile	1	Waning Crescent (35.1% Full)	Dark	Light Rain	8:00 - 10:00	00:13:00	No Record	0
August	2012	2012-08-12	Leptodeira septentrionalis	Northern Cat-eyed Snake	Reptile	1	Waning Crescent (25.9% Full)	Dark	Dry	8:00 - 10:00	01:01:00	No Record	2
August	2012	2012-08-13	Leptodeira septentrionalis	Northern Cat-eyed Snake	Reptile	1	Waning Crescent (18.1% Full)	Dark	Light Rain	6:00 - 8:00	01:51:00	No Record	2
August	2012	2012-08-15	Enuliophis sclateri	Sock-headed Snake	Reptile	1	Waning Crescent (5.5% Full)	Dark	Dry	7:45 - 10:00	03:33:00	No Record	2.25
August	2012	2012-08-18	Leptodeira septentrionalis	Northern Cat-eyed Snake	Reptile	2	Waxing Crescent (0.7% Full)	Dark	Dry	7:30 - 10:45	06:10:00	No Record	2.75
August	2012	2012-08-18	Mastigodryas melanolomus	Neotropical Racer	Reptile	1	Waxing Crescent (0.7% Full)	Dark	Dry	7:30 - 10:45	06:10:00	No Record	0
August	2012	2012-08-19	Leptodeira septentrionalis	Northern Cat-eyed Snake	Reptile	1	Waxing Crescent (3.8% Full)	Dark	Dry	8:00 - 10:00	07:03:00	No Record	2
August	2012	2012-08-20	Leptodeira septentrionalis	Northern Cat-eyed Snake	Reptile	1	Waxing Crescent (9.2% Full)	Dark	Dry	8:00 - 10:00	07:57:00	No Record	2
August	2012	2012-08-21	Imantodes cenchoa	Chunk-headed Snake	Reptile	1	Waxing Crescent (16.7% Full)	Dark	Dry	7:30 - 10:30`	08:52:00	No Record	3
August	2012	2012-08-22	Leptodeira septentrionalis	Northern Cat-eyed Snake	Reptile	1	Waxing Crescent (26.1% Full)	Dark	Dry	7:30 - 10:30`	09:49:00	No Record	3
August	2012	2012-08-25	Leptodeira septentrionalis	Northern Cat-eyed Snake	Reptile	1	Waxing Gibbous (59.2% Full)	Dark	Dry	8:00 - 10:00	12:47:00	No Record	2
August	2012	2012-08-27	Leptodeira septentrionalis	Northern Cat-eyed Snake	Reptile	2	Waxing Gibbous (81.0% Full)	Semi-bright	Dry	8:00 - 10:30	14:40:00	No Record	2.5
August	2012	2012-08-30	Leptodeira septentrionalis	Northern Cat-eyed Snake	Reptile	1	Waxing Gibbous (98.3% Full)	Dark	Rainy	6:30 - 9:00	17:05:00	No Record	2.5
August	2012	2012-08-31	Siphlophis compressus	Red-eyed Tree Snake	Reptile	1	Full Moon (99.9% Full)	Semi-bright	Dry	7:30 - 10:00	17:49:00	No Record	2.5
September	2012	2012-09-02	Enuliophis sclateri	Sock-headed Snake	Reptile	1	Waning Gibbous (96.5% Full)	Dark	Dry	7:00 - 9:30	7:12PM	No Record	2.5
September	2012	2012-09-02	Leptodeira septentrionalis	Nothern Cat-eyed Snake	Reptile	1	Waning Gibbous (96.5% Full)	Dark	Dry	7:00 - 9:30	7:12PM	No Record	0
September	2012	2012-09-02	Leptophis ahaetulla	Giant Parrot Snake	Reptile	1	Waning Gibbous (96.5% Full)	Dark	Dry	7:00 - 9:30	7:12PM	No Record	0
September	2012	2012-09-24	Leptodeira septentrionalis	Nothern Cat-eyed Snake	Reptile	1	Waxing Gibbous (71.7% Full)	Semi-bright	Dry	7:30 - 10:30	13:28:00	No Record	3
September	2012	2012-09-25	Enuliophis sclateri	Sock-headed Snake	Reptile	1	Waxing Gibbous (77.2% Full)	Semi-bright	Dry	7:45 - 10:00	14:16:00	No Record	0
September	2012	2012-09-25	Imantodes cenchoa	Chunk-headed Snake	Reptile	1	Waxing Gibbous (77.2% Full)	Semi-bright	Dry	7:45 - 10:00	14:16:00	No Record	0
September	2012	2012-09-25	Leptodeira septentrionalis	Nothern Cat-eyed Snake	Reptile	1	Waxing Gibbous (77.2% Full)	Semi-bright	Dry	7:45 - 10:00	14:16:00	No Record	2.25
October	2012	2012-10-25	Leptodeira septentrionalis	Nothern Cat-eyed Snake	Reptile	1	Waxing Gibbous (82% Full)	Bright	Dry	8:00 - 10:30	16:13:00	No Record	2.5
October	2012	2012-10-30	Imantodes cenchoa	Chunk-headed Snake	Reptile	1	Waning Gibbous (99.3% Full)	Bright	Dry	7:30 - 10:00	17:56:00	No Record	2.5
November	2012	2012-11-02	Imantodes cenchoa	Chunk-headed Snake	Reptile	1	Waning Gibbous (89.0% Full)	Dark	Rainy	7:45 - 10:30	20:18:00	No Record	2.25
November	2012	2012-11-02	Leptodeira septentrionalis	Northern Cat-eyed Snake	Reptile	1	Waning Gibbous (89.0% Full)	Dark	Rainy	7:45 - 10:30	20:18:00	No Record	0
November	2012	2012-11-03	Imantodes cenchoa	Chunk-headed Snake	Reptile	1	Waning Gibbous (79.6% Full)	Dark	Dry	7:45 - 10:30	21:07:00	No Record	0
November	2012	2012-11-03	Mastigodryas melanolomus	Neotropical Racer	Reptile	1	Waning Gibbous (79.6% Full)	Dark	Dry	7:45 - 10:30	21:07:00	No Record	2.75
November	2012	2012-11-05	Enuliophis sclateri	Sock-headed Snake	Reptile	1	Waning Gibbous (65.7% Full)	Dark	Dry	7:30 - 10:30	22:45:00	No Record	3
November	2012	2012-11-05	Imantodes cenchoa	Chunk-headed Snake	Reptile	1	Waning Gibbous (65.7% Full)	Dark	Dry	7:30 - 10:30	22:45:00	No Record	0
November	2012	2012-11-05	Leptodeira septentrionalis	Northern Cat-eyed Snake	Reptile	1	Waning Gibbous (65.7% Full)	Dark	Dry	7:30 - 10:30	22:45:00	No Record	0
November	2012	2012-11-06	Imantodes cenchoa	Chunk-headed Snake	Reptile	1	Last Quarter (55.9% Full)	Dark	Rainy	7:30 - 10:15	23:34:00	No Record	2.75
November	2012	2012-11-07	Imantodes cenchoa	Chunk-headed Snake	Reptile	1	Waning Crescent (45.8% Full)	Dark	Dry	7:30 - 10:15	-	No Record	0
November	2012	2012-11-07	Leptodeira septentrionalis	Northern Cat-eyed Snake	Reptile	2	Waning Crescent (45.8% Full)	Dark	Dry	7:30 - 10:15	-	No Record	2.75
November	2012	2012-11-07	Siphlophis compressus	Red-eyed Tree Snake	Reptile	1	Waning Crescent (45.8% Full)	Dark	Dry	7:30 - 10:15	-	No Record	0
November	2012	2012-11-09	Leptodeira septentrionalis	Northern Cat-eyed Snake	Reptile	2	Waning Crescent (25.9% Full)	Dark	Dry	7:30 - 10:45	01:15:00	No Record	3.25
November	2012	2012-11-13	Imantodes cenchoa	Chunk-headed Snake	Reptile	2	New Moon (0.4% Full)	Dark	Dry	7:45 - 10:00	05:02:00	No Record	0
November	2012	2012-11-13	Leptodeira septentrionalis	Northern Cat-eyed Snake	Reptile	2	New Moon (0.4% Full)	Dark	Dry	7:45 - 10:00	05:02:00	No Record	2.25
November	2012	2012-11-15	Dendrophidion percarinatum	Barred Forest Racer	Reptile	1	Waxing Crescent (3.4% Full)	Dark	Dry	7:30 - 10:20	07:10:00	No Record	2.75
November	2012	2012-11-15	Imantodes cenchoa	Chunk-headed Snake	Reptile	1	Waxing Crescent (3.4% Full)	Dark	Dry	7:30 - 10:20	07:10:00	No Record	0
November	2012	2012-11-16	Siphlophis compressus	Red-eyed Tree Snake	Reptile	1	Waxing Crescent (9.3% Full)	Dark	Dry	7:40 - 10:30	08:13:00	No Record	0
November	2012	2012-11-16	Enuliophis sclateri	Sock-headed Snake	Reptile	1	Waxing Crescent (9.3% Full)	Dark	Dry	7:40 - 10:30	08:13:00	No Record	0
November	2012	2012-11-16	Imantodes cenchoa	Chunk-headed Snake	Reptile	2	Waxing Crescent (9.3% Full)	Dark	Dry	7:40 - 10:30	08:13:00	No Record	3
November	2012	2012-11-17	Enuliophis sclateri	Sock-headed Snake	Reptile	1	Waxing Crescent (17.1% Full)	Dark	Dry	7:30 - 10:00	09:11:00	No Record	2.5
November	2012	2012-11-18	Leptodeira septentrionalis	Northern Cat-eyed Snake	Reptile	1	Waxing Crescent (26.9% Full)	Dark	Dry	8:00 - 10:00	10:06:00	No Record	2
November	2012	2012-11-19	Leptodeira septentrionalis	Northern Cat-eyed Snake	Reptile	1	Waxing Crescent (36.8% Full)	Semi-bright	Dry	7:30 - 10:30	10:55:00	No Record	3
November	2012	2012-11-20	Imantodes cenchoa	Chunk-headed Snake	Reptile	1	First Quarter (48.2% Full)	Dark	Rainy	8:15 - 10:30	11:41:00	No Record	2.25
November	2012	2012-11-21	Leptodeira septentrionalis	Northern Cat-eyed Snake	Reptile	1	Waxing Gibbous (58.3% Full)	Semi-bright	Dry	7:30 - 10:30	12:24:00	No Record	3
November	2012	2012-11-22	Bothriechis schlegelii	Eyelash Viper	Reptile	1	Waxing Gibbous (68% Full)	Semi-bright	Dry	7:30 - 10:30	13:06:00	No Record	3
November	2012	2012-11-23	Bothriechis schlegelii	Eyelash Viper	Reptile	1	Waxing Gibbous (77.1% Full)	Semi-bright	Dry	7:30 - 10:30	13:47:00	No Record	3
November	2012	2012-11-23	Leptodeira septentrionalis	Northern Cat-eyed Snake	Reptile	1	Waxing Gibbous (77.1% Full)	Semi-bright	Dry	7:30 - 10:30	13:47:00	No Record	0
November	2012	2012-11-24	Bothriechis schlegelii	Eyelash Viper	Reptile	1	Waxing Gibbous (84.8% Full)	Semi-bright	Dry	7:30 - 10:30	14:28:00	No Record	0
November	2012	2012-11-24	Leptodeira septentrionalis	Northern Cat-eyed Snake	Reptile	1	Waxing Gibbous (84.8% Full)	Semi-bright	Dry	7:30 - 10:30	14:28:00	No Record	3
November	2012	2012-11-25	Imantodes cenchoa	Chunk-headed Snake	Reptile	1	Waxing Gibbous (90.9% Full)	Bright	Rainy	7:45 - 10:15	15:10:00	No Record	2.5
November	2012	2012-11-25	Mastigodryas melanolomus	Neotropical Racer	Reptile	1	Waxing Gibbous (90.9% Full)	Bright	Rainy	7:45 - 10:15	15:10:00	No Record	0
November	2012	2012-11-29	Imantodes cenchoa	Chunk-headed Snake	Reptile	2	Waning Gibbous (99.4% Full)	Semi-bright	Dry	7:30 - 10:15	18:14:00	No Record	2.75
November	2012	2012-11-30	Leptodeira septentrionalis	Northern Cat-eyed Snake	Reptile	1	Waning Gibbous (97% Full)	Semi-bright	Rainy	7:30 - 10:15	19:03:00	No Record	2.75
December	2012	2012-12-02	Bothrops asper	Fer-de-lance	Reptile	1	Waning Gibbous (85.4% Full)	Dark	Dry	5:30 - 7:45	20:41:00	No Record	2.25
December	2012	2012-12-02	Bothrops asper	Fer-de-lance	Reptile	1	Waning Gibbous (85.4% Full)	Dark	Dry	7:30 - 10:00	20:41:00	No Record	0
December	2012	2012-12-02	Leptodeira septentrionalis	Northern Cat-eyed Snake	Reptile	1	Waning Gibbous (85.4% Full)	Dark	Dry	7:30 - 10:00	20:41:00	No Record	2.5
December	2012	2012-12-03	Imantodes cenchoa	Chunk-headed Snake	Reptile	1	Waning Gibbous (80.4% Full)	Dark	Dry	7:30 - 10:15	21:29:00	No Record	2.75
December	2012	2012-12-04	Imantodes cenchoa	Chunk-headed Snake	Reptile	1	Waning Gibbous (72.8% Full)	Dark	Dry	7:30 - 10:30	22:18:00	No Record	3
December	2012	2012-12-06	Leptodeira septentrionalis	Northern Cat-eyed Snake	Reptile	3	Last Quarter (52.4% Full)	Dark	Dry	7:45 - 10:00	23:57:00	No Record	2.25
December	2012	2012-12-08	Imantodes cenchoa	Chunk-headed Snake	Reptile	2	Waning Crescent (31.5% Full)	Dark	Dry	7:30 - 10:15	00:49:00	No Record	2.75
December	2012	2012-12-09	Imantodes cenchoa	Chunk-headed Snake	Reptile	1	Waning Crescent (21.6% Full)	Dark	Dry	6:00 - 8:00	01:44:00	No Record	2
December	2012	2012-12-09	Leptodeira septentrionalis	Northern Cat-eyed Snake	Reptile	1	Waning Crescent (21.6% Full)	Dark	Dry	6:00 - 8:00	01:44:00	No Record	0
December	2012	2012-12-10	Mastigodryas melanolomus	Neotropical Racer	Reptile	1	Waning Crescent (8.6% Full)	Dark	Dry	7:50 - 10:30	02:42:00	No Record	2.75
December	2012	2012-12-11	Imantodes cenchoa	Chunk-headed Snake	Reptile	1	Waning Crescent (5.7% Full)	Dark	Dry	7:50 - 10:30	03:43:00	No Record	2.75
December	2012	2012-12-11	Leptodeira septentrionalis	Northern Cat-eyed Snake	Reptile	1	Waning Crescent (5.7% Full)	Dark	Dry	7:50 - 10:30	03:43:00	No Record	0
December	2012	2012-12-12	Leptodeira septentrionalis	Northern Cat-eyed Snake	Reptile	1	Waning Crescent (1.3% Full)	Dark	Dry	7:30 - 10:20	04:47:00	No Record	2.75
December	2012	2012-12-13	Leptodeira septentrionalis	Northern Cat-eyed Snake	Reptile	1	New Moon (0.0% Full)	Dark	Light Rain	7:30 - 10:20	05:51:00	No Record	2.75
December	2012	2012-12-15	Enuliophis sclateri	Sock-headed Snake	Reptile	1	Waxing Crescent (9.3% Full)	Dark	Light Rain	5:30 - 7:45	07:52:00	No Record	2.25
December	2012	2012-12-15	Imantodes cenchoa	Chunk-headed Snake	Reptile	1	Waxing Crescent (9.3% Full)	Dark	Light Rain	5:30 - 7:45	07:52:00	No Record	0
December	2012	2012-12-18	Imantodes cenchoa	Chunk-headed Snake	Reptile	1	Waxing Crescent (30.9% Full)	Semi-bright	Dry	5:30 - 7:45	10:20:00	No Record	2.25
December	2012	2012-12-20	Leptodeira septentrionalis	Northern Cat-eyed Snake	Reptile	1	Waxing Gibbous (52.0% Full)	Semi-bright	Dry	7:30 - 10:30	11:45:00	No Record	3
December	2012	2012-12-20	Mastigodryas melanolomus	Neotropical Racer	Reptile	2	Waxing Gibbous (52.0% Full)	Semi-bright	Dry	7:30 - 10:30	11:45:00	No Record	0
December	2012	2012-12-22	Imantodes cenchoa	Chunk-headed Snake	Reptile	1	Waxing Gibbous (72% Full)	Semi-bright	Dry	7:30 - 10:30	13:09:00	No Record	3
December	2012	2012-12-23	Bothriechis schlegelii	Eyelash Viper	Reptile	1	Waxing Gibbous (79.1% Full)	Semi-bright	Dry	7:30 - 10:15	13:52:00	No Record	2.75
December	2012	2012-12-25	Leptodeira septentrionalis	Northern Cat-eyed Snake	Reptile	1	Waxing Gibbous (92% Full)	Semi-bright	Dry	6:00 - 8:00	15:23:00	No Record	2
December	2012	2012-12-25	Mastigodryas melanolomus	Neotropical Racer	Reptile	1	Waxing Gibbous (92% Full)	Semi-bright	Dry	6:00 - 8:00	15:23:00	No Record	0
December	2012	2012-12-25	Imantodes cenchoa	Chunk-headed Snake	Reptile	2	Waxing Gibbous (92% Full)	Semi-bright	Dry	8:00 - 10:00	15:23:00	No Record	2
December	2012	2012-12-25	Mastigodryas melanolomus	Neotropical Racer	Reptile	1	Waxing Gibbous (92% Full)	Semi-bright	Dry	8:00 - 10:00	15:23:00	No Record	0
December	2012	2012-12-26	Imantodes cenchoa	Chunk-headed Snake	Reptile	1	Waxing Gibbous (96.4% Full)	Semi-bright	Light Rain	7:30 - 10:15	16:11:00	No Record	0
December	2012	2012-12-26	Leptodeira septentrionalis	Northern Cat-eyed Snake	Reptile	1	Waxing Gibbous (96.4% Full)	Semi-bright	Light Rain	7:30 - 10:15	16:11:00	No Record	0
December	2012	2012-12-26	Stenorrhina degenhardtii	Degenhardt's Scorpion-eater	Reptile	1	Waxing Gibbous (96.4% Full)	Semi-bright	Light Rain	7:30 - 10:15	16:11:00	No Record	2.75
December	2012	2012-12-27	Imantodes cenchoa	Chunk-headed Snake	Reptile	1	Waxing Gibbous (99% Full)	Semi-bright	Dry	6:00 - 8:00	17:00:00	No Record	0
December	2012	2012-12-27	Leptodeira septentrionalis	Northern Cat-eyed Snake	Reptile	1	Waxing Gibbous (99% Full)	Semi-bright	Dry	6:00 - 8:00	17:00:00	No Record	2
December	2012	2012-12-27	Leptodeira septentrionalis	Northern Cat-eyed Snake	Reptile	1	Waxing Gibbous (99% Full)	Semi-bright	Dry	8:00 - 10:00	17:00:00	No Record	2
December	2012	2012-12-28	Imantodes cenchoa	Chunk-headed Snake	Reptile	1	Full Moon (100% Full)	Dark	Dry	5:30 - 7:45	17:49:00	No Record	2.25
December	2012	2012-12-28	Leptodeira septentrionalis	Northern Cat-eyed Snake	Reptile	1	Full Moon (100% Full)	Dark	Dry	5:30 - 7:45	17:49:00	No Record	0
December	2012	2012-12-28	Leptodeira septentrionalis	Northern Cat-eyed Snake	Reptile	2	Full Moon (100% Full)	Semi-bright	Light Rain	7:30 - 10:00	17:49:00	No Record	2.5
December	2012	2012-12-29	Siphlophis compressus	Red-eyed Tree Snake	Reptile	1	Waning Gibbous (99.1% Full)	Dark	Dry	6:00 - 8:00	18:38:00	No Record	2
December	2012	2012-12-29	Leptodeira septentrionalis	Northern Cat-eyed Snake	Reptile	1	Waning Gibbous (99.1% Full)	Semi-bright	Dry	8:00 - 10:00	18:38:00	No Record	2
December	2012	2012-12-29	Mastigodryas melanolomus	Neotropical Racer	Reptile	1	Waning Gibbous (99.1% Full)	Semi-bright	Dry	8:00 - 10:00	18:38:00	No Record	0
December	2012	2012-12-30	Leptodeira septentrionalis	Northern Cat-eyed Snake	Reptile	1	Waning Gibbous (96.3% Full)	Dark	Rainy	6:00 - 7:15	19:27:00	No Record	2.25
December	2012	2012-12-31	Leptodeira septentrionalis	Northern Cat-eyed Snake	Reptile	1	Waning Gibbous (91.8% Full)	Dark	Dry	8:00 - 10:00	20:15:00	No Record	2
January	2013	2012-01-08	Leptodeira septentrionalis	Northern Cat-eyed Snake	Reptile	1	Waning Crescent (16% Full)	Dark	Dry	7:30 - 10:15	02:28:00	No Record	2.75
January	2013	2013-01-01	Mastigodryas melanolomus	Neotropical Racer	Reptile	1	Waning Gibbous (85.5% Full)	Dark	Light Rain	7:45 - 10:00	21:04:00	No Record	2.25
January	2013	2013-01-02	Imantodes cenchoa	Chunk-headed Snake	Reptile	1	Waning Gibbous (72.1% Full)	Dark	Rainy	7:30 - 10:15	21:52:00	No Record	2.75
January	2013	2013-01-03	Mastigodryas melanolomus	Neotropical Racer	Reptile	1	Waning Gibbous (68.1% Full)	Dark	Dry	6:00 - 10:00	22:43:00	No Record	2
January	2013	2013-01-03	Mastigodryas melanolomus	Neonate Neotropical Racer	Reptile	1	Waning Gibbous (68.1% Full)	Dark	Dry	8:00 - 10:00	22:43:00	No Record	2
January	2013	2013-01-03	Mastigodryas melanolomus	Neotropical Racer	Reptile	1	Waning Gibbous (68.1% Full)	Dark	Dry	8:00 - 10:00	22:43:00	No Record	0
January	2013	2013-01-04	Leptodeira septentrionalis	Northern Cat-eyed Snake	Reptile	1	Last Quarter (58.3% Full)	Dark	Dry	8:00 - 10:00	23:35:00	No Record	2
January	2013	2013-01-05	Leptodeira septentrionalis	Northern Cat-eyed Snake	Reptile	2	Waning Crescent (47.3% Full)	Dark	Dry	6:00 - 8:00	-	No Record	2
January	2013	2013-01-05	Leptodeira septentrionalis	Northern Cat-eyed Snake	Reptile	2	Waning Crescent (47.3% Full)	Dark	Dry	7:30 - 10:00	-	No Record	0
January	2013	2013-01-06	Imantodes cenchoa	Chunk-headed Snake	Reptile	1	Waning Crescent (36% Full)	Dark	Dry	7:30 - 10:30	00:29:00	No Record	3
January	2013	2013-01-06	Leptodeira septentrionalis	Northern Cat-eyed Snake	Reptile	2	Waning Crescent (36% Full)	Dark	Dry	7:30 - 10:30	00:29:00	No Record	0
January	2013	2013-01-09	Phrynonax poecilonotus	Neotropical Bird Snake	Reptile	1	Waning Crescent (8.1% Full)	Dark	Dry	7:30 - 10:15	03:30:00	No Record	2.75
January	2013	2013-01-10	Leptodeira septentrionalis	Northern Cat-eyed Snake	Reptile	1	Waning Crescent (2.8% Full)	Dark	Dry	7:30 - 10:00	04:33:00	No Record	2.5
January	2013	2013-01-10	Leptodeira septentrionalis	Northern Cat-eyed Snake	Reptile	1	Waning Crescent (2.8% Full)	Dark	Dry	7:30 - 10:00	04:33:00	No Record	0
January	2013	2013-01-11	Leptodeira septentrionalis	Northern Cat-eyed Snake	Reptile	2	New Moon (0.2% Full)	Dark	Dry	7:30 - 10:00	05:33:00	No Record	2.5
January	2013	2013-01-12	Leptodeira septentrionalis	Northern Cat-eyed Snake	Reptile	1	Waxing Crescent (0.5% Full)	Dark	Dry	7:30 - 10:00	06:29:00	No Record	2.5
January	2013	2013-01-13	Enuliophis sclateri	Sock-headed Snake	Reptile	1	Waxing Crescent (3.7% Full)	Dark	Dry	5:45 - 7:45	07:21:00	No Record	2
January	2013	2013-01-13	Leptodeira septentrionalis	Northern Cat-eyed Snake	Reptile	1	Waxing Crescent (3.7% Full)	Dark	Dry	7:30 - 10:15	07:21:00	No Record	2.75
January	2013	2013-01-14	Boa imperator	Boa Constrictor	Reptile	1	Waxing Crescent (9.0% Full)	Dark	Dry	7:44 - 9:20	08:10:00	No Record	2.5
January	2013	2013-01-14	Enuliophis sclateri	Sock-headed Snake	Reptile	1	Waxing Crescent (9.0% Full)	Dark	Dry	7:44 - 9:20	08:10:00	No Record	0
January	2013	2013-01-14	Imantodes cenchoa	Chunk-headed Snake	Reptile	1	Waxing Crescent (9.0% Full)	Dark	Dry	7:44 - 9:20	08:10:00	No Record	0
January	2013	2013-01-15	Imantodes cenchoa	Chunk-headed Snake	Reptile	1	Waxing Crescent (16.5% Full)	Dark	Dry	7:30 -10:30	08:56:00	No Record	3
January	2013	2013-01-15	Leptodeira septentrionalis	Northern Cat-eyed Snake	Reptile	1	Waxing Crescent (16.5% Full)	Dark	Dry	7:30 -10:30	08:56:00	No Record	0
January	2013	2013-01-15	Siphlophis compressus	Red-eyed Tree Snake	Reptile	1	Waxing Crescent (16.5% Full)	Dark	Dry	7:30 -10:30	08:56:00	No Record	0
January	2013	2013-01-16	Leptodeira septentrionalis	Northern Cat-eyed Snake	Reptile	1	Waxing Crescent (24.9% Full)	Dark	Light Rain	7:30 -10:00	09:40:00	No Record	2.5
January	2013	2013-01-17	Mastigodryas melanolomus	Neotropical Racer	Reptile	1	Waxing Crescent (34.4% Full)	Dark	Dry	7:30 -10:00	10:22:00	No Record	2.5
January	2013	2013-01-18	Leptodeira septentrionalis	Northern Cat-eyed Snake	Reptile	1	First Quarter (44.0% Full)	Dark	Dry	7:30 -10:00	11:05:00	No Record	2.5
January	2013	2013-01-18	Mastigodryas melanolomus	Neotropical Racer	Reptile	1	First Quarter (44.0% Full)	Dark	Dry	7:30 -10:00	11:05:00	No Record	0
January	2013	2013-01-24	Boa imperator	Boa Constrictor	Reptile	1	Waxing Gibbous (94.6% Full)	Bright	Dry	8:00 - 10:00	15:43:00	No Record	0
January	2013	2013-01-24	Imantodes cenchoa	Chunk-headed Snake	Reptile	1	Waxing Gibbous (94.6% Full)	Bright	Dry	8:00 - 10:00	15:43:00	No Record	0
January	2013	2013-01-24	Leptodeira septentrionalis	Northern Cat-eyed Snake	Reptile	1	Waxing Gibbous (94.6% Full)	Bright	Dry	8:00 - 10:00	15:43:00	No Record	2
January	2013	2013-01-26	Imantodes cenchoa	Chunk-headed Snake	Reptile	1	Waxing Gibbous (99.6% Full)	Bright	Dry	7:30 - 10:15	17:22:00	No Record	0
January	2013	2013-01-26	Leptodeira septentrionalis	Northern Cat-eyed Snake	Reptile	1	Waxing Gibbous (99.6% Full)	Bright	Dry	7:30 - 10:15	17:22:00	No Record	2.75
January	2013	2013-01-27	Leptodeira septentrionalis	Northern Cat-eyed Snake	Reptile	1	Full Moon (100% Full)	Bright	Dry	6:00 - 8:00	18:12:00	No Record	2
January	2013	2013-01-27	Dendrophidion percarinatum	Barred Forest Racer	Reptile	1	Full Moon (100% Full)	Bright	Dry	7:30 - 10:00	18:12:00	No Record	2.5
January	2013	2013-01-28	Dendrophidion percarinatum	Barred Forest Racer	Reptile	1	Waning Gibbous (98.5% Full)	Bright	Dry	7:30 - 10:00	19:01:00	No Record	2.5
January	2013	2013-01-30	Imantodes cenchoa	Chunk-headed Snake	Reptile	1	Waning Gibbous (89.7% Full)	Dark	Dry	8:00 - 10:00	20:40:00	No Record	2
January	2013	2013-01-30	Leptodeira septentrionalis	Northern Cat-eyed Snake	Reptile	1	Waning Gibbous (89.7% Full)	Dark	Dry	8:00 - 10:15	20:40:00	No Record	2.25
January	2013	2013-01-31	Dendrophidion percarinatum	Barred Forest Racer	Reptile	1	Waning Gibbous (82.1% Full)	Dark	Dry	7:30 - 10:00	21:31:00	No Record	0
January	2013	2013-01-31	Mastigodryas melanolomus	Neotropical Racer	Reptile	1	Waning Gibbous (82.1% Full)	Dark	Dry	7:30 - 10:00	21:31:00	No Record	2.5
February	2013	2013-02-02	Imantodes cenchoa	Chunk-headed Snake	Reptile	1	Waning Gibbous (62.6% Full)	Dark	Dry	7:30 - 10:15	23:20:00	No Record	2.25
February	2013	2013-02-02	Imantodes cenchoa	Juvenile Chunk-headed Snake	Reptile	1	Waning Gibbous (62.6% Full)	Dark	Dry	7:30 - 10:15	23:20:00	No Record	0
February	2013	2013-02-02	Leptodeira septentrionalis	Juvenile Northern Cat-eyed Snake	Reptile	1	Waning Gibbous (62.6% Full)	Dark	Dry	7:30 - 10:15	23:20:00	No Record	0
February	2013	2013-02-03	Leptodeira septentrionalis	Northern Cat-eyed Snake	Reptile	1	Last Quarter (51.6% Full)	Dark	Dry	8:00 - 10:00	-	No Record	2
February	2013	2013-02-03	Leptodeira septentrionalis	Juvenile Northern Cat-eyed Snake	Reptile	1	Last Quarter (51.6% Full)	Dark	Dry	8:00 - 10:00	-	No Record	0
February	2013	2013-02-04	Enuliophis sclateri	Sock-headed Snake	Reptile	1	Waning Crescent (40.6% Full)	Dark	Dry	8:00 - 10:15	00:18:00	No Record	2.25
February	2013	2013-02-04	Leptodeira septentrionalis	Northern Cat-eyed Snake	Reptile	1	Waning Crescent (40.6% Full)	Dark	Dry	8:00 - 10:15	00:18:00	No Record	0
February	2013	2013-02-05	Leptodeira septentrionalis	Northern Cat-eyed Snake	Reptile	1	Waning Crescent (29.8% Full)	Dark	Dry	7:30 - 10:00	01:17:00	No Record	2.5
February	2013	2013-02-06	Leptodeira septentrionalis	Northern Cat-eyed Snake	Reptile	2	Waning Crescent (19.5% Full)	Dark	Dry	7:30 - 10:00	02:17:00	No Record	2.5
February	2013	2013-02-10	Imantodes cenchoa	Chunk-headed Snake	Reptile	1	New Moon (0.0% Full)	Dark	Dry	7:30 - 10:30	05:57:00	No Record	3
February	2013	2013-02-10	Leptodeira septentrionalis	Northern Cat-eyed Snake	Reptile	1	New Moon (0.0% Full)	Dark	Dry	7:30 - 10:30	05:57:00	No Record	0
February	2013	2013-02-11	Leptodeira septentrionalis	Northern Cat-eyed Snake	Reptile	2	Waxing Crescent (0.7% Full)	Dark	Dry	7:30 - 11:00	06:45:00	No Record	2.5
February	2013	2013-02-12	Corallus ruschenbergerii	Northern Tree Boa	Reptile	1	Waxing Crescent (5.6% Full)	Dark	Dry	7:30 - 10:30	07:30:00	No Record	0
February	2013	2013-02-12	Leptodeira septentrionalis	Northern Cat-eyed Snake	Reptile	1	Waxing Crescent (5.6% Full)	Dark	Dry	7:30 - 10:30	07:30:00	No Record	3
February	2013	2013-02-13	Leptodeira septentrionalis	Northern Cat-eyed Snake	Reptile	1	Waxing Crescent (15.9% Full)	Dark	Dry	7:30 - 10:20	08:14:00	No Record	3
February	2013	2013-02-19	Enuliophis sclateri	Sock-headed Snake	Reptile	1	Waxing Gibbous (69.9% Full)	Semi-bright	Dry	7:30 - 10:00	12:47:00	No Record	2.5
February	2013	2013-02-19	Rhadinella godmani	Yellow-bellied Litter Snake	Reptile	1	Waxing Gibbous (69.9% Full)	Semi-bright	Dry	7:30 - 10:00	12:47:00	No Record	0
February	2013	2013-02-20	Mastigodryas melanolomus	Neotropical Racer	Reptile	1	Waxing Gibbous (73.2% Full)	Semi-bright	Dry	7:30 - 10:00	13:36:00	No Record	2.5
February	2013	2013-02-21	Imantodes cenchoa	Chunk-headed Snake	Reptile	1	Waxing Gibbous (81.2% Full)	Bright	Dry	7:30 - 10:15	14:25:00	No Record	2.75
February	2013	2013-02-21	Leptodeira septentrionalis	Northern Cat-eyed Snake	Reptile	1	Waxing Gibbous (81.2% Full)	Bright	Dry	7:30 - 10:15	14:25:00	No Record	0
February	2013	2013-02-22	Imantodes cenchoa	Chunk-headed Snake	Reptile	1	Waxing Gibbous (90.8% Full)	Bright	Dry	7:30 - 10:00	15:15:00	No Record	2.5
February	2013	2013-02-22	Leptodeira septentrionalis	Northern Cat-eyed Snake	Reptile	2	Waxing Gibbous (90.8% Full)	Bright	Dry	7:30 - 10:00	15:15:00	No Record	0
February	2013	2013-02-23	Leptodeira septentrionalis	Northern Cat-eyed Snake	Reptile	1	Waxing Gibbous (95.6% Full)	Bright	Dry	6:00 - 8:00	16:04:00	No Record	2
February	2013	2013-02-26	Leptodeira septentrionalis	Northern Cat-eyed Snake	Reptile	1	Waning Gibbous (98.8% Full)	Semi-bright	Dry	8:00 - 10:00	18:35:00	No Record	2
February	2013	2013-02-26	Leptodeira septentrionalis	Northern Cat-eyed Snake	Reptile	1	Waning Gibbous (98.8% Full)	Semi-bright	Dry	8:00 - 10:00	18:35:00	No Record	0
February	2013	2013-02-27	Bothriechis schlegelii	Eyelash Viper	Reptile	1	Waning Gibbous (95.5% Full)	Dark	Dry	7:30 - 10:30	19:27:00	No Record	0
February	2013	2013-02-27	Imantodes cenchoa	Chunk-headed Snake	Reptile	1	Waning Gibbous (95.5% Full)	Dark	Dry	7:30 - 10:30	19:27:00	No Record	0
February	2013	2013-02-27	Leptodeira septentrionalis	Northern Cat-eyed Snake	Reptile	2	Waning Gibbous (95.5% Full)	Dark	Dry	7:30 - 10:30	19:27:00	No Record	3
February	2013	2013-02-28	Leptodeira septentrionalis	Northern Cat-eyed Snake	Reptile	1	Waning Gibbous (89.7% Full)	Dark	Dry	7:30 - 10:00	20:20:00	No Record	2.5
March	2013	2013-03-01	Imantodes cenchoa	Chunk-headed Snake	Reptile	1	Waning Gibbous (82.1% Full)	Dark	Rainy	7:30 - 10:15	21:15:00	No Record	0
March	2013	2013-03-01	Leptodeira septentrionalis	Northern Cat-eyed Snake	Reptile	1	Waning Gibbous (82.1% Full)	Dark	Rainy	7:30 - 10:15	21:15:00	No Record	0
March	2013	2013-03-01	Leptodeira septentrionalis	Northern Cat-eyed Snake	Reptile	1	Waning Gibbous (82.1% Full)	Dark	Rainy	7:30 - 10:15	21:15:00	No Record	2.75
March	2013	2013-03-02	Enuliophis sclateri	Sock-headed Snake	Reptile	1	Waning Gibbous (72.5% Full)	Dark	Dry	7:30 - 10:15	22:12:00	No Record	2.75
March	2013	2013-03-02	Imantodes cenchoa	Chunk-headed Snake	Reptile	1	Waning Gibbous (72.5% Full)	Dark	Dry	7:30 - 10:15	22:12:00	No Record	0
March	2013	2013-03-02	Leptodeira septentrionalis	Northern Cat-eyed Snake	Reptile	1	Waning Gibbous (72.5% Full)	Dark	Dry	7:30 - 10:15	22:12:00	No Record	0
March	2013	2013-03-03	Leptodeira septentrionalis	Northern Cat-eyed Snake	Reptile	1	Waning Gibbous (62.0% Full)	Dark	Dry	7:30 - 10:15	23:11:00	No Record	2.75
March	2013	2013-03-05	Leptodeira septentrionalis	Northern Cat-eyed Snake	Reptile	1	Waning Crescent (39% Full)	Dark	Dry	7:45 - 10:00	00:10:00	No Record	2.25
March	2013	2013-03-06	Leptodeira septentrionalis	Northern Cat-eyed Snake	Reptile	1	Waning Crescent (28.4% Full)	Dark	Dry	7:30 - 10:15	01:08:00	No Record	2.75
March	2013	2013-03-08	Corallus ruschenbergerii	Northern Tree Boa	Reptile	1	Waning Crescent (10.6% Full)	Dark	Dry	7:30 - 10:15	02:58:00	No Record	2.75
March	2013	2013-03-08	Imantodes cenchoa	Chunk-headed Snake	Reptile	1	Waning Crescent (10.6% Full)	Dark	Dry	7:30 - 10:15	02:58:00	No Record	0
March	2013	2013-03-09	Corallus ruschenbergerii	Northern Tree Boa	Reptile	1	Waning Crescent (4.7% Full)	Dark	Dry	7:30 - 10:15	03:48:00	No Record	0
March	2013	2013-03-09	Leptodeira septentrionalis	Northern Cat-eyed Snake	Reptile	1	Waning Crescent (4.7% Full)	Dark	Dry	7:30 - 10:15	03:48:00	No Record	2.75
March	2013	2013-03-10	Boa imperator	Boa Constrictor	Reptile	1	Waning Crescent (1.2% Full)	Dark	Dry	7:30 - 10:15	04:36:00	No Record	2.75
March	2013	2013-03-10	Leptodeira septentrionalis	Northern Cat-eyed Snake	Reptile	2	Waning Crescent (1.2% Full)	Dark	Dry	7:30 - 10:15	04:36:00	No Record	0
March	2013	2013-03-10	Mastigodryas melanolomus	Neotropical Racer	Reptile	1	Waning Crescent (1.2% Full)	Dark	Dry	7:30 - 10:15	04:36:00	No Record	0
March	2013	2013-03-11	Leptodeira septentrionalis	Northern Cat-eyed Snake	Reptile	1	New Moon (0.0% Full)	Dark	Dry	7:30 - 10:30	05:21:00	No Record	3
March	2013	2013-03-12	Coniophanes fissidens	Brown Spotbelly	Reptile	1	Waxing Crescent (1.2% Full)	Dark	Dry	7:30 - 10:30	06:06:00	No Record	3
March	2013	2013-03-12	Corallus ruschenbergerii	Northern Tree Boa	Reptile	1	Waxing Crescent (1.2% Full)	Dark	Dry	7:30 - 10:30	06:06:00	No Record	0
March	2013	2013-03-13	Imantodes cenchoa	Chunk-headed Snake Feeding	Reptile	1	Waxing Crescent (4.6% Full)	Dark	Dry	7:30 - 10:30	06:50:00	No Record	3
March	2013	2013-03-13	Leptodeira septentrionalis	Northern Cat-eyed Snake	Reptile	1	Waxing Crescent (4.6% Full)	Dark	Dry	7:30 - 10:30	06:50:00	No Record	0
March	2013	2013-03-15	Leptodeira septentrionalis	Northern Cat-eyed Snake	Reptile	1	Waxing Crescent (16.5% Full)	Dark	Dry	8:00 - 10:00	08:20:00	No Record	2
March	2013	2013-03-18	Leptodeira septentrionalis	Northern Cat-eyed Snake	Reptile	1	Waxing Crescent (41.8% Full)	Dark	Dry	7:30 - 10:30	10:40:00	No Record	3
March	2013	2013-03-18	Siphlophis compressus	Red-eyed Tree Snake	Reptile	1	Waxing Crescent (41.8% Full)	Dark	Dry	7:30 - 10:30	10:40:00	No Record	0
March	2013	2013-03-19	Leptodeira septentrionalis	Northern Cat-eyed Snake	Reptile	2	First Quarter (51.2% Full)	Dark	Dry	7:30 - 10:00	11:28:00	No Record	2.5
March	2013	2013-03-22	Enuliophis sclateri	Sock-headed Snake	Reptile	1	Waxing Gibbous (78.6% Full)	Dark	Dry	8:00 - 10:00	13:55:00	No Record	0
March	2013	2013-03-22	Leptodeira septentrionalis	Northern Cat-eyed Snake	Reptile	1	Waxing Gibbous (78.6% Full)	Dark	Dry	8:00 - 10:00	13:55:00	No Record	2
March	2013	2013-03-25	Phrynonax poecilonotus	Neotropical Birdsnake	Reptile	1	Waxing Gibbous (96.8% Full)	Bright	Light Rain	6:00 - 8:00	16:25:00	No Record	2
March	2013	2013-03-26	Imantodes cenchoa	Chunk-headed Snake	Reptile	1	Waxing Gibbous (99.6% Full)	Semi-bright	Light Rain	7:30 - 10:00	17:17:00	No Record	2.5
March	2013	2013-03-27	Imantodes cenchoa	Chunk-headed Snake	Reptile	1	Full Moon (99.8% Full)	Bright	Dry	8:00 - 10:00	18:11:00	No Record	2
March	2013	2013-03-29	Leptodeira septentrionalis	Northern Cat-eyed Snake	Reptile	1	Waning Gibbous (92.3 % Full)	Dark	Dry	7:30 - 10:15	20:05:00	No Record	2.75
March	2013	2013-03-30	Imantodes cenchoa	Chunk-headed Snake	Reptile	1	Waning Gibbous (84.7% Full)	Dark	Dry	8:00 - 10:00	21:04:00	No Record	2
March	2013	2013-03-31	Imantodes cenchoa	Chunk-headed Snake	Reptile	1	Waning Gibbous (76.5% Full)	Dark	Dry	5:30 - 7:45	22:04:00	No Record	2.25
March	2013	2013-03-31	Leptodeira septentrionalis	Northern Cat-eyed Snake	Reptile	1	Waning Gibbous (75.7% Full)	Dark	Dry	7:30 - 10:00	22:04:00	No Record	2.5
April	2013	2013-04-02	Leptodeira septentrionalis	Northern Cat-eyed Snake	Reptile	1	First Quarter (54.6% Full)	Dark	Light Rain	6:00 - 8:00	23:59:00	No Record	2
April	2013	2013-04-02	Leptodeira septentrionalis	Northern Cat-eyed Snake	Reptile	1	First Quarter (53.9% Full)	Dark	Dry	7:30 - 10:00	23:59:00	No Record	2.5
April	2013	2013-04-04	Enuliophis sclateri	Sock-headed Snake	Reptile	1	Waning Crescent (31.7%Full)	Dark	Dry	7:30 - 10:15	00:54:00	No Record	2.75
April	2013	2013-04-04	Leptodeira septentrionalis	Northern Cat-eyed Snake	Reptile	2	Waning Crescent (31.7%Full)	Dark	Dry	7:30 - 10:15	00:54:00	No Record	0
April	2013	2013-04-07	Leptodeira septentrionalis	Northern Cat-eyed Snake	Reptile	4	Waning Crescent (7%Full)	Dark	Dry	6:00 - 8:00	03:17:00	No Record	2
April	2013	2013-04-07	Ninia maculata	Banded Coffee Snake	Reptile	1	Waning Crescent (7%Full)	Dark	Dry	7:30 - 10:15	03:17:00	No Record	2.75
April	2013	2013-04-09	Imantodes cenchoa	Chunk-headed Snake	Reptile	1	Waning Crescent (0.3%Full)	Dark	Dry	8:00 - 10:00	04:45:00	No Record	2
April	2013	2013-04-09	Leptodeira septentrionalis	Northern Cat-eyed Snake	Reptile	1	Waning Crescent (0.3%Full)	Dark	Dry	8:00 - 10:00	04:45:00	No Record	0
April	2013	2013-04-10	Leptodeira septentrionalis	Northern Cat-eyed Snake	Reptile	1	New Moon (0.2% Full)	Dark	Dry	7:30 - 10:15	05:29:00	No Record	2.75
April	2013	2013-04-14	Enuliophis sclateri	Sock-headed Snake	Reptile	1	Waxing Crescent (17.8% Full)	Dark	Dry	7:30 - 10:45	08:33:00	No Record	3.25
April	2013	2013-04-14	Imantodes cenchoa	Chunk-headed Snake	Reptile	1	Waxing Crescent (17.8% Full)	Dark	Dry	7:30 - 10:45	08:33:00	No Record	0
April	2013	2013-04-14	Leptodeira septentrionalis	Northern Cat-eyed Snake	Reptile	1	Waxing Crescent (17.8% Full)	Dark	Dry	7:30 - 10:45	08:33:00	No Record	0
April	2013	2013-04-15	Imantodes cenchoa	Chunk-headed Snake	Reptile	1	Waxing Crescent (25.7% Full)	Dark	Light Rain	7:30 - 10:15	09:21:00	No Record	2.75
April	2013	2013-04-15	Leptodeira septentrionalis	Northern Cat-eyed Snake	Reptile	1	Waxing Crescent (25.7% Full)	Dark	Light Rain	7:30 - 10:15	09:21:00	No Record	0
April	2013	2013-04-16	Leptodeira septentrionalis	Northern Cat-eyed Snake	Reptile	3	Waxing Crescent (34.1% Full)	Dark	Dry	7:30 - 10:30	10:09:00	No Record	3
April	2013	2013-04-16	Leptodeira septentrionalis	Northern Cat-eyed Snake	Reptile	1	Waxing Crescent (34.1% Full)	Dark	Dry	7:30 - 10:30	10:09:00	No Record	0
April	2013	2013-04-18	Imantodes cenchoa	Chunk-headed Snake	Reptile	1	First Quarter (53.4% Full)	Dark	Dry	8:00 - 10:00	11:46:00	No Record	2
April	2013	2013-04-21	Imantodes cenchoa	Chunk-headed Snake	Reptile	1	Waxing Gibbous (81.1% Full)	Dark	Dry	7:30 - 10:30	14:12:00	No Record	0
April	2013	2013-04-21	Leptodeira septentrionalis	Northern Cat-eyed Snake	Reptile	1	Waxing Gibbous (81.1% Full)	Dark	Dry	7:30 - 10:30	14:12:00	No Record	3
April	2013	2013-04-21	Siphlophis compressus	Red-eyed Tree Snake	Reptile	1	Waxing Gibbous (81.1% Full)	Dark	Dry	7:30 - 10:30	14:12:00	No Record	0
April	2013	2013-04-23	Leptodeira septentrionalis	Northern Cat-eyed Snake	Reptile	1	Waxing Gibbous (94.7% Full)	Bright	Dry	7:30 - 10:30	15:56:00	No Record	3
April	2013	2013-04-25	Leptodeira septentrionalis	Northern Cat-eyed Snake	Reptile	1	Full Moon (100% Full)	Semi-bright	Dry	7:30 - 10:30	17:50:00	No Record	3
May	2013	2013-05-06	Enuliophis sclateri	Sock-headed Snake	Reptile	1	Waning Crescent (9.6% Full)	Dark	Dry	7:30 - 10:30	02:43:00	No Record	0
May	2013	2013-05-06	Enuliophis sclateri	Sock-headed Snake	Reptile	1	Waning Crescent (9.6% Full)	Dark	Dry	7:30 - 10:30	02:43:00	No Record	0
May	2013	2013-05-06	Imantodes cenchoa	Chunk-headed Snake	Reptile	1	Waning Crescent (9.6% Full)	Dark	Dry	7:30 - 10:30	02:43:00	No Record	0
May	2013	2013-05-06	Leptodeira septentrionalis	Northern Cat-eyed Snake	Reptile	1	Waning Crescent (9.6% Full)	Dark	Dry	7:30 - 10:30	02:43:00	No Record	3
May	2013	2013-05-06	Siphlophis compressus	Red-eyed Tree Snake	Reptile	1	Waning Crescent (9.6% Full)	Dark	Dry	7:30 - 10:30	02:43:00	No Record	0
May	2013	2013-05-10	Corallus ruschenbergerii	Northern Tree Boa	Reptile	1	Waxing Crescent (0.6% Full)	Dark	Dry	7:30 - 10:30	05:41:00	No Record	3
May	2013	2013-05-13	Boa imperator	Boa Constrictor	Reptile	1	Waxing Crescent (12.9% Full)	Dark	Light Rain	7:30 - 10:30	08:04:00	No Record	0
May	2013	2013-05-13	Imantodes cenchoa	Chunk-headed Snake	Reptile	1	Waxing Crescent (12.9% Full)	Dark	Light Rain	7:30 - 10:30	08:04:00	No Record	3
May	2013	2013-05-13	Imantodes cenchoa	Chunk-headed Snake	Reptile	1	Waxing Crescent (12.9% Full)	Dark	Light Rain	7:30 - 10:30	08:04:00	No Record	0
May	2013	2013-05-13	Leptodeira septentrionalis	Northern Cat-eyed Snake	Reptile	1	Waxing Crescent (12.9% Full)	Dark	Light Rain	7:30 - 10:30	08:04:00	No Record	0
May	2013	2013-05-16	Leptodeira septentrionalis	Northern Cat-eyed Snake	Reptile	1	Waxing Crescent (36.9% Full)	Dark	Dry	7:30 - 10:30	10:27:00	No Record	3
May	2013	2013-05-17	Leptodeira septentrionalis	Northern Cat-eyed Snake	Reptile	1	First Quarter (46.7% Full)	Dark	Dry	7:30 - 10:30	11:15:00	No Record	3
May	2013	2013-05-18	Enuliophis sclateri	Sock-headed Snake	Reptile	1	Waxing Gibbous (56.5% Full)	Dark	Dry	7:30 - 10:30	12:03:00	No Record	0
May	2013	2013-05-18	Imantodes cenchoa	Chunk-headed Snake	Reptile	1	Waxing Gibbous (56.5% Full)	Dark	Dry	7:30 - 10:30	12:03:00	No Record	3
May	2013	2013-05-22	Bothrops asper	Fer-de-lance	Reptile	1	Waxing Gibbous (92.3% Full)	Dark	Light Rain	7:45 - 10:00	15:32:00	No Record	2.25
May	2013	2013-05-22	Phrynonax poecilonotus	Neotropical Birdsnake	Reptile	1	Waxing Gibbous (92.3% Full)	Dark	Light Rain	7:45 - 10:00	15:32:00	No Record	0
May	2013	2013-05-22	Siphlophis compressus	Red-eyed Tree Snake	Reptile	1	Waxing Gibbous (92.3% Full)	Dark	Light Rain	7:45 - 10:00	15:32:00	No Record	0
May	2013	2013-05-24	Bothrops asper	Fer-de-lance	Reptile	1	Full Moon (99.8% Full)	Semi-bright	Dry	8:00 - 10:15	17:34:00	No Record	2.25
May	2013	2013-05-24	Leptodeira septentrionalis	Northern Cat-eyed Snake	Reptile	1	Full Moon (99.8% Full)	Semi-bright	Dry	8:00 - 10:15	17:34:00	No Record	0
May	2013	2013-05-25	Leptodeira septentrionalis	Northern Cat-eyed Snake	Reptile	2	Waning Gibous (99.3% Full)	Bright	Dry	8:00 - 10:15	18:37:00	No Record	2.25
May	2013	2013-05-31	Imantodes cenchoa	Chunk-headed Snake	Reptile	1	Last Quarter (49.1% Full)	Dark	Dry	8:00 - 10:00	23:59:00	No Record	0
May	2013	2013-05-31	Leptodeira septentrionalis	Northern Cat-eyed Snake	Reptile	2	Last Quarter (49.1% Full)	Dark	Dry	8:00 - 10:00	23:59:00	No Record	2
June	2013	2013-06-01	Leptodeira septentrionalis	Leptodeira septentrionalis	Reptile	1	Waning Crescent (38.8% Full)	Dark	Dry	7:30 - 10:00	-	No Record	2.5
June	2013	2013-06-03	Imantodes cenchoa	Chunk-headed Snake	Reptile	1	Waning Crescent (20.5% Full)	Dark	Light Rain	7:30 - 10:30	01:26:00	No Record	3
June	2013	2013-06-03	Leptodeira septentrionalis	Leptodeira septentrionalis	Reptile	1	Waning Crescent (20.5% Full)	Dark	Light Rain	7:30 - 10:30	01:26:00	No Record	0
June	2013	2013-06-17	Boa imperator	Boa Constrictor	Reptile	1	Waxing Gibbous (62.1% Full)	Dark	Light Rain	8:00 - 10:00	12:24:00	No Record	0
June	2013	2013-06-17	Leptodeira septentrionalis	Northern Cat-eyed Snake	Reptile	2	Waxing Gibbous (62.1% Full)	Dark	Light Rain	8:00 - 10:00	12:24:00	No Record	2
June	2013	2013-06-20	Boa imperator	Boa Constrictor	Reptile	1	Waxing Gibbous (89.9% Full)	Bright	Dry	8:00 - 10:00	15:13:00	No Record	2
June	2013	2013-06-22	Boa imperator	Boa Constrictor	Reptile	1	Waxing Gibbous (99.4% Full)	Bright	Dry	8:00 - 10:00	17:19:00	No Record	2
June	2013	2013-06-24	Boa imperator	Boa Constrictor	Reptile	1	Waning Gibbous (96.9% Full)	Semi-bright	Dry	8:00 - 10:00	19:21:00	No Record	0
June	2013	2013-06-24	Leptodeira septentrionalis	Northern Cat-eyed Snake	Reptile	2	Waning Gibbous (96.9% Full)	Semi-bright	Dry	8:00 - 10:00	19:21:00	No Record	2
June	2013	2013-06-25	Leptodeira septentrionalis	Leptodeira septentrionalis	Reptile	1	Waning Gibbous (91.6% Full)	Dark	Dry	7:30 - 10:00	20:16:00	No Record	2.5
June	2013	2013-06-26	Enuliophis sclateri	Sock-headed Snake	Reptile	2	Waning Gibbous (83.9% Full)	Dark	Dry	7:30 - 10:20	21:07:00	No Record	3
June	2013	2013-06-28	Leptodeira septentrionalis	Northern Cat-eyed Snake	Reptile	3	Waning Gibbous (64% Full)	Dark	Dry	8:00 - 10:00	22:40:00	No Record	2
June	2013	2013-06-29	Boa imperator	Boa Constrictor	Reptile	1	Last Quarter (53.7% Full)	Dark	Dry	7:45 - 10:20	23:24:00	No Record	2.5
June	2013	2013-06-30	Imantodes cenchoa	Chunk-headed Snake	Reptile	1	Waning Crescent (43.7% Full)	Dark	Dry	7:30 - 10:00	-	No Record	2.5
July	2013	2013-07-01	Enuliophis sclateri	Sock-headed Snake	Reptile	1	Waning Crescent (33.7% Full)	Dark	Dry	7:30 - 10:45	00:08:00	No Record	3.25
July	2013	2013-07-01	Imantodes cenchoa	Chunk-headed Snake	Reptile	1	Waning Crescent (33.7% Full)	Dark	Dry	7:30 - 10:45	00:08:00	No Record	0
July	2013	2013-07-01	Leptodeira septentrionalis	Northern Cat-eyed Snake	Reptile	2	Waning Crescent (33.7% Full)	Dark	Dry	7:30 - 10:45	00:08:00	No Record	0
July	2013	2013-07-03	Enuliophis sclateri	Sock-headed Snake	Reptile	1	Waning Crescent (16.8% Full)	Dark	Light Rain	7:30 - 10:15	01:36:00	No Record	2.75
July	2013	2013-07-03	Leptodeira septentrionalis	Northern Cat-eyed Snake	Reptile	1	Waning Crescent (16.8% Full)	Dark	Light Rain	7:30 - 10:15	01:36:00	No Record	0
July	2013	2013-07-06	Leptodeira septentrionalis	Northern Cat-eyed Snake	Reptile	1	Waning Crescent (1.9% Full)	Dark	Dry	7:30 - 10:00	03:57:00	No Record	2.5
July	2013	2013-07-07	Leptodeira septentrionalis	Northern Cat-eyed Snake	Reptile	1	Waning Crescent (0.2% Full)	Dark	Rainy	7:30 - 10:30	04:45:00	No Record	3
July	2013	2013-07-11	Imantodes cenchoa	Chunk-headed Snake	Reptile	1	Waxing Crescent (11% Full)	Dark	Dry	6:00 - 8:00	07:56:00	No Record	2
July	2013	2013-07-11	Enuliophis sclateri	Sock-headed Snake	Reptile	1	Waxing Crescent (11.4% Full)	Dark	Dry	7:30 - 10:30	07:56:00	No Record	0
July	2013	2013-07-11	Leptodeira septentrionalis	Northern Cat-eyed Snake	Reptile	1	Waxing Crescent (11.4% Full)	Dark	Dry	7:30 - 10:30	07:56:00	No Record	3
July	2013	2013-07-12	Enuliophis sclateri	Sock-headed Snake	Reptile	1	Waxing Crescent (18.5% Full)	Dark	Dry	7:30 - 10:30	08:43:00	No Record	0
July	2013	2013-07-12	Leptodeira septentrionalis	Northern Cat-eyed Snake	Reptile	1	Waxing Crescent (18.5% Full)	Dark	Dry	7:30 - 10:30	08:43:00	No Record	3
July	2013	2013-07-13	Leptodeira septentrionalis	Northern Cat-eyed Snake	Reptile	1	Waxing Crescent (26.8% Full)	Dark	Dry	7:30 - 10:30	09:30:00	No Record	3
July	2013	2013-07-14	Imantodes cenchoa	Chunk-headed Snake	Reptile	1	Waxing Crescent (36.3% Full)	Dark	Light Rain	7:30 - 10:30	10:19:00	No Record	3
July	2013	2013-07-14	Leptodeira septentrionalis	Northern Cat-eyed Snake	Reptile	1	Waxing Crescent (36.3% Full)	Dark	Light Rain	7:30 - 10:30	10:19:00	No Record	0
July	2013	2013-07-15	Leptodeira septentrionalis	Northern Cat-eyed Snake	Reptile	1	First Quarter (46.7% Full)	Dark	Light Rain	7:30 - 9:30	11:10:00	No Record	2
July	2013	2013-07-16	Imantodes cenchoa	Chunk-headed Snake	Reptile	1	Waxing Gibbous (57.7% Full)	Semi-bright	Dry	7:45 - 10:30	12:03:00	No Record	0
July	2013	2013-07-16	Leptodeira septentrionalis	Northern Cat-eyed Snake	Reptile	2	Waxing Gibbous (57.7% Full)	Semi-bright	Dry	7:45 - 10:30	12:03:00	No Record	2.75
July	2013	2013-07-17	Leptodeira septentrionalis	Northern Cat-eyed Snake	Reptile	2	Waxing Gibbous (68.5% Full)	Dark	Rainy	7:30 - 10:15	12:59:00	No Record	2.75
July	2013	2013-07-19	Leptodeira septentrionalis	Northern Cat-eyed Snake	Reptile	1	Waxing Gibbous (87.7% Full)	Bright	Dry	7:30 - 10:30	15:00:00	No Record	3
July	2013	2013-07-22	Leptodeira septentrionalis	Northern Cat-eyed Snake	Reptile	1	Full Moon (100% Full)	Bright	Dry	7:45 - 10:00	18:00:00	No Record	2.25
July	2013	2013-07-23	Leptophis ahaetulla	Giant Parrot Snake	Reptile	1	Waning Gibbous (98.2% Full)	Bright	Dry	7:30 - 10:30	18:54:00	No Record	3
July	2013	2013-07-24	Enuliophis sclateri	Sock-headed Snake	Reptile	1	Waning Gibbous (93.6% Full)	Dark	Dry	7:30 - 10:30	19:45:00	No Record	3
July	2013	2013-07-24	Mastigodryas melanolomus	Neotropical Racer	Reptile	1	Waning Gibbous (93.6% Full)	Dark	Dry	7:30 - 10:30	19:45:00	No Record	0
July	2013	2013-07-25	Leptodeira septentrionalis	Northern Cat-eyed Snake	Reptile	1	Waning Gibbous (87.3% Full)	Dark	Dry	6:00 - 8:00	20:33:00	No Record	2
July	2013	2013-07-25	Leptodeira septentrionalis	Northern Cat-eyed Snake	Reptile	3	Waning Gibbous (86.9% Full)	Dark	Dry	7:30 - 10:30	20:33:00	No Record	3
July	2013	2013-07-25	Mastigodryas melanolomus	Neotropical Racer	Reptile	1	Waning Gibbous (86.9% Full)	Dark	Dry	7:30 - 10:30	20:33:00	No Record	0
July	2013	2013-07-27	Bothrops asper	Fer-de-lance	Reptile	1	Waning Gibbous (69.1% Full)	Dark	Dry	7:30 - 10:40	22:04:00	No Record	0
July	2013	2013-07-27	Leptodeira septentrionalis	Northern Cat-eyed Snake	Reptile	1	Waning Gibbous (69.1% Full)	Dark	Dry	7:30 - 10:40	22:04:00	No Record	3
July	2013	2013-07-28	Leptodeira septentrionalis	Northern Cat-eyed Snake	Reptile	1	Waning Gibbous (59.1% Full)	Dark	Light Rain	7:30 - 10:40	22:48:00	No Record	3
July	2013	2013-07-30	Leptodeira septentrionalis	Northern Cat-eyed Snake	Reptile	1	Waning Crescent (39.3% Full)	Dark	Dry	7:30 - 10:15	-	No Record	2.75
August	2013	2013-08-01	Leptodeira septentrionalis	Northern Cat-eyed Snake	Reptile	1	Waning Crescent (21.9% Full)	Dark	Rainy	7:30 - 10:15	01:06:00	No Record	2.75
August	2013	2013-08-01	Leptodeira septentrionalis	Northern Cat-eyed Snake	Reptile	1	Waning Crescent (21.9% Full)	Dark	Rainy	7:30 - 10:15	01:06:00	No Record	0
August	2013	2013-08-02	Leptodeira septentrionalis	Northern Cat-eyed Snake	Reptile	1	Waning Crescent (14.5% Full)	Dark	Dry	7:30 - 10:15	01:54:00	No Record	2.75
August	2013	2013-08-05	Leptodeira septentrionalis	Northern Cat-eyed Snake	Reptile	1	Waning Crescent (1.1% Full)	Dark	Rainy	7:30 - 10:15	04:18:00	No Record	2.75
August	2013	2013-08-06	Enuliophis sclateri	Sock-headed Snake	Reptile	1	New Moon (0.0% Full)	Dark	Dry	7:00 - 9:00	05:06:00	No Record	2
August	2013	2013-08-23	Leptodeira septentrionalis	Northern Cat-eyed Snake	Reptile	1	Waning Gibbous (90.2% Full)	Dark	Dry	7:30 - 10:15	19:55:00	No Record	2.75
August	2013	2013-08-26	Leptodeira septentrionalis	Northern Cat-eyed Snake	Reptile	1	Waning Gibbous (65% Full)	Dark	Dry	7:30 - 10:20	22:14:00	No Record	3
August	2013	2013-08-29	Leptodeira septentrionalis	Northern Cat-eyed Snake	Reptile	1	Waning Crescent (36.4% Full)	Dark	Dry	7:30 - 10:20	none	No Record	3
September	2013	2013-09-10	Leptodeira septentrionalis	Northern Cat-eyed Snake	Reptile	4	Waxing Crescent (28.9% Full)	Dark	Rainy	5:45 - 8:00	09:44:00	No Record	2.25
September	2013	2013-09-10	Siphlophis compressus	Red-eyed Tree Snake	Reptile	1	Waxing Crescent (28.9% Full)	Dark	Rainy	5:45 - 8:00	09:44:00	No Record	0
September	2013	2013-09-11	Leptodeira septentrionalis	Common Cat-eyed Snake	Reptile	1	Waxing Crescent (40.3% Full)	Dark	Light Rain	7:30 - 10:20	10:41:00	No Record	3
September	2013	2013-09-11	Leptodeira septentrionalis	Northern Cat-eyed Snake	Reptile	3	Waxing Crescent (40.3% Full)	Dark	Light Rain	7:30 - 10:20	10:41:00	No Record	0
September	2013	2013-09-12	Leptodeira septentrionalis	Northern Cat-eyed Snake	Reptile	1	First Quartet (51.9% Full)	Dark	Dry	7:30 - 10:10	11:40:00	No Record	2.5
September	2013	2013-09-16	Boa imperator	Boa Constrictor	Reptile	1	Waxing Gibbous (90.0% Full)	Bright	Light Rain	7:30 - 10:10	15:20:00	No Record	2.5
September	2013	2013-09-16	Leptodeira septentrionalis	Northern Cat-eyed Snake	Reptile	1	Waxing Gibbous (90.0% Full)	Bright	Light Rain	7:30 - 10:10	15:20:00	No Record	0
September	2013	2013-09-21	Imantodes cenchoa	Chunk-headed Snake	Reptile	1	Waning Gibbous (93.4% Full)	Semi-bright	Light Rain	7:30 - 10:20	19:18:00	No Record	0
September	2013	2013-09-21	Leptodeira septentrionalis	Northern Cat-eyed Snake	Reptile	1	Waning Gibbous (93.4% Full)	Semi-bright	Light Rain	7:30 - 10:20	19:18:00	No Record	3
September	2013	2013-09-23	Leptodeira septentrionalis	Northern Cat-eyed Snake	Reptile	1	Waning Gibbous (79.9% Full)	Dark	Dry	7:30 - 10:00	20:53:00	No Record	2.5
September	2013	2013-09-25	Leptodeira septentrionalis	Northern Cat-eyed Snake	Reptile	1	Waning Gibbous (62.5% Full)	Dark	Light Rain	7:15 - 9:45	22:30:00	No Record	2.5
October	2013	2013-10-20	Leptodeira septentrionalis	Northern Cat-eyed Snake	Reptile	1	Waning Gibbous (96.3% Full)	Semi-bright	Dry	7:30 - 10:50	18:44:00	No Record	3.5
October	2013	2013-10-20	Leptodeira septentrionalis	Northern Cat-eyed Snake	Reptile	1	Waning Gibbous (96.3% Full)	Semi-bright	Dry	7:30 - 10:50	18:44:00	No Record	0
October	2013	2013-10-21	Leptodeira septentrionalis	Northern Cat-eyed Snake	Reptile	1	Waning Gibbous (91.6% Full)	Dark	Dry	7:30 - 10:30	19:33:00	No Record	3
October	2013	2013-10-23	Leptodeira septentrionalis	Northern Cat-eyed Snake	Reptile	2	Waning Gibbous (81.5% Full)	Dark	Dry	7:30 - 10:00	21:10:00	No Record	2.5
October	2013	2013-10-23	Micrurus alleni	Allen's Coral Snake	Reptile	1	Waning Gibbous (81.5% Full)	Dark	Dry	7:30 - 10:00	21:10:00	No Record	0
November	2013	2013-11-02	Boa imperator	Boa Constrictor	Reptile	1	Waning Crescent (0.6% Full)	Dark	Dry	7:45 - 10:10	04:29:00	No Record	2.5
November	2013	2013-11-04	Leptodeira septentrionalis	Northern Cat-eyed Snake	Reptile	1	Waxing Crescent (2.3% Full)	Dark	Dry	7:30 - 10:00	06:24:00	No Record	2.5
November	2013	2013-11-05	Leptodeira septentrionalis	Northern Cat-eyed Snake	Reptile	10	Waxing Crescent (7.3% Full)	Dark	Dry	8:00 - 10:00	07:24:00	No Record	2
November	2013	2013-11-08	Chironius flavopictus	Keeled Whip Snake	Reptile	1	Waxing Crescent (34.1% Full)	Dark	Light Rain	7:30 - 10:15	10:20:00	No Record	0
November	2013	2013-11-08	Leptodeira septentrionalis	Northern Cat-eyed Snake	Reptile	1	Waxing Crescent (34.1% Full)	Dark	Light Rain	7:30 - 10:15	10:20:00	No Record	2.75
November	2013	2013-11-09	Leptodeira septentrionalis	Northern Cat-eyed Snake	Reptile	1	First Quarter (45.3% Full)	Dark	Dry	7:30 - 10:00	11:13:00	No Record	0
November	2013	2013-11-09	Siphlophis compressus	Red-eyed Tree Snake	Reptile	1	First Quarter (45.3% Full)	Dark	Dry	7:30 - 10:00	11:13:00	No Record	2.5
November	2013	2013-11-10	Leptodeira septentrionalis	Northern Cat-eyed Snake	Reptile	1	Waxing Gibbous (56.9% Full)	Dark	Rainy	8:00 - 10:00	12:02:00	No Record	2
November	2013	2013-11-13	Enuliophis sclateri	Sock-headed Snake	Reptile	1	Waxing Gibbous (85.7% Full)	Bright	Dry	8:00 - 10:20	14:20:00	No Record	2.5
November	2013	2013-11-13	Leptophis ahaetulla	Giant Parrot Snake	Reptile	1	Waxing Gibbous (85.7% Full)	Bright	Dry	8:00 - 10:20	14:20:00	No Record	0
November	2013	2013-11-16	Leptodeira septentrionalis	Northern Cat-eyed Snake	Reptile	1	Waxing Gibbous (99.4% Full)	Bright	Dry	7:30 - 10:15	16:38:00	No Record	2.75
November	2013	2013-11-17	Imantodes cenchoa	Chunk-headed Snake	Reptile	1	Full Moon (100% Full)	Bright	Dry	7:30 - 10:30	17:26:00	No Record	0
November	2013	2013-11-17	Siphlophis compressus	Red-eyed Tree Snake	Reptile	1	Full Moon (100% Full)	Bright	Dry	7:30 - 10:30	17:26:00	No Record	3
November	2013	2013-11-19	Imantodes cenchoa	Chunk-headed Snake	Reptile	1	Waning Gibbous (95.4% Full)	Semi-bright	Dry	7:30 - 10:18	19:03:00	No Record	0
November	2013	2013-11-19	Leptodeira septentrionalis	Northern Cat-eyed Snake	Reptile	1	Waning Gibbous (95.4% Full)	Semi-bright	Dry	7:30 - 10:18	19:03:00	No Record	2.75
November	2013	2013-11-21	Leptodeira septentrionalis	Northern Cat-eyed Snake	Reptile	1	Waning Gibbous (84.3% Full)	Dark	Dry	7:30 - 10:20	20:40:00	No Record	3
November	2013	2013-11-22	Micrurus alleni	Allen's Coral Snake	Reptile	1	Waning Gibbous (76.8% Full)	Dark	Dry	7:30 - 10:30	21:27:00	No Record	3
November	2013	2013-11-23	Leptodeira septentrionalis	Northern Cat-eyed Snake	Reptile	1	Waning Gibbous (68.3% Full)	Dark	Rainy	7:30 - 10:00	22:13:00	No Record	2.5
November	2013	2013-11-25	Leptodeira septentrionalis	Northern Cat-eyed Snake	Reptile	1	Last Quarter (50.2% Full)	Dark	Rainy	6:00 - 8:00	23:46:00	No Record	2
November	2013	2013-11-27	Imantodes cenchoa	Chunk-headed Snake	Reptile	1	Waning Crescent (30.4% Full)	Dark	Dry	7:30 - 10:15	00:34:00	No Record	0
November	2013	2013-11-27	Leptodeira septentrionalis	Northern Cat-eyed Snake	Reptile	1	Waning Crescent (30.4% Full)	Dark	Dry	7:30 - 10:15	00:34:00	No Record	2.75
November	2013	2013-11-28	Corallus ruschenbergerii	Northern Tree Boa	Reptile	1	Waning Crescent (20.8% Full)	Dark	Dry	8:00 - 10:30	01:22:00	No Record	0
November	2013	2013-11-28	Leptodeira septentrionalis	Northern Cat-eyed Snake	Reptile	1	Waning Crescent (20.8% Full)	Dark	Dry	8:00 - 10:30	01:22:00	No Record	2.5
November	2013	2013-11-30	Leptodeira septentrionalis	Northern Cat-eyed Snake	Reptile	1	Waning Crescent (6.4% Full)	Dark	Dry	7:30 - 10:30	03:08:00	No Record	0
November	2013	2013-11-30	Siphlophis compressus	Red-eyed Tree Snake	Reptile	1	Waning Crescent (6.4% Full)	Dark	Dry	7:30 - 10:30	03:08:00	No Record	3
December	2013	2013-12-02	Corallus ruschenbergerii	Northern Tree Boa	Reptile	1	New Moon (0% Full)	Dark	Dry	7:30 - 10:30	05:06:00	No Record	0
December	2013	2013-12-02	Enuliophis sclateri	Sock-headed Snake	Reptile	1	New Moon (0% Full)	Dark	Dry	7:30 - 10:30	05:06:00	No Record	3
December	2013	2013-12-04	Imantodes cenchoa	Chunk-headed Snake	Reptile	1	Waxing Crescent (4.9% Full)	Dark	Dry	7:30 - 10:30	07:10:00	No Record	3
December	2013	2013-12-04	Leptodeira septentrionalis	Northern Cat-eyed Snake	Reptile	1	Waxing Crescent (4.9% Full)	Dark	Dry	7:30 - 10:30	07:10:00	No Record	0
December	2013	2013-12-06	Leptodeira septentrionalis	Northern Cat-eyed Snake	Reptile	1	Waxing Crescent (20% Full)	Dark	Dry	7:30 - 10:15	09:06:00	No Record	0
December	2013	2013-12-06	Leptophis ahaetulla	Giant Parrot Snake	Reptile	1	Waxing Crescent (20% Full)	Dark	Dry	7:30 - 10:15	09:06:00	No Record	2.75
December	2013	2013-12-07	Corallus ruschenbergerii	Northern Tree Boa	Reptile	1	Waxing Crescent (30.2% Full)	Dark	Dry	8:00 - 10:15	09:58:00	No Record	0
December	2013	2013-12-07	Enuliophis sclateri	Sock-headed Snake	Reptile	1	Waxing Crescent (30.2% Full)	Dark	Dry	8:00 - 10:15	09:58:00	No Record	0
December	2013	2013-12-07	Leptodeira septentrionalis	Northern Cat-eyed Snake	Reptile	1	Waxing Crescent (30.2% Full)	Dark	Dry	8:00 - 10:15	09:58:00	No Record	2.25
December	2013	2013-12-09	Leptodeira septentrionalis	Northern Cat-eyed Snake	Reptile	1	First Quarter (52.1% Full)	Dark	Light Rain	7:30 - 10:30	11:35:00	No Record	3
December	2013	2013-12-10	Enuliophis sclateri	Sock-headed Snake	Reptile	1	Waxing Gibbous (62.8% Full)	Bright	Dry	7:30 - 10:30	00:20:00	No Record	3
December	2013	2013-12-11	Enuliophis sclateri	Sock-headed Snake	Reptile	2	Waxing Gibbous (72..5% Full)	Bright	Dry	7:30 - 10:00	13:05:00	No Record	2.5
December	2013	2013-12-13	Leptodeira septentrionalis	Northern Cat-eyed Snake	Reptile	1	Waxing Gibbous (88.7% Full)	Bright	Dry	8:00 - 10:00	14:35:00	No Record	2
December	2013	2013-12-14	Imantodes cenchoa	Chunk-headed Snake	Reptile	1	Waxing Gibbous (94% Full)	Bright	Dry	7:30 - 10:30	15:22:00	No Record	3
December	2013	2013-12-17	Imantodes cenchoa	Chunk-headed Snake	Reptile	1	Full Moon (99.8% Full)	Bright	Light Rain	8:00 - 10:25	17:46:00	No Record	2.5
December	2013	2013-12-17	Leptodeira septentrionalis	Northern Cat-eyed Snake	Reptile	1	Full Moon (99.8% Full)	Bright	Light Rain	8:00 - 10:25	17:46:00	No Record	0
December	2013	2013-12-20	Leptodeira septentrionalis	Northern Cat-eyed Snake	Reptile	1	Waning Gibbous (89.5% Full)	Dark	Dry	7:30 - 10:15	20:09:00	No Record	2.75
December	2013	2013-12-22	Siphlophis compressus	Red-eyed Tree Snake	Reptile	1	Waning Gibbous (75.3% Full)	Dark	Dry	7:30 - 10:15	21:41:00	No Record	2.75
December	2013	2013-12-23	Leptodeira septentrionalis	Northern Cat-eyed Snake	Reptile	1	Waning Gibbous (67.4% Full)	Dark	Dry	6:00 - 8:00	22:27:00	No Record	2
December	2013	2013-12-23	Imantodes cenchoa	Chunk-headed Snake	Reptile	1	Waning Gibbous (66.7% Full)	Dark	Dry	7:30 - 10:00	22:27:00	No Record	2.5
December	2013	2013-12-25	Enuliophis sclateri	Sock-headed Snake	Reptile	1	Last Quarter (47.2% Full)	Dark	Dry	7:30 - 10:00	none	No Record	0
December	2013	2013-12-25	Imantodes cenchoa	Chunk-headed Snake	Reptile	1	Last Quarter (47.2% Full)	Dark	Dry	7:30 - 10:00	none	No Record	0
December	2013	2013-12-25	Leptophis ahaetulla	Giant Parrot Snake	Reptile	1	Last Quarter (47.2% Full)	Dark	Dry	7:30 - 10:00	none	No Record	2.5
December	2013	2013-12-26	Imantodes cenchoa	Chunk-headed Snake	Reptile	1	Waning Crescent (37.9% Full)	Dark	Dry	5:30 - 7:45	00:03:00	No Record	2.75
December	2013	2013-12-26	Leptodeira septentrionalis	Northern Cat-eyed Snake	Reptile	1	Waning Crescent (37.9% Full)	Dark	Dry	5:30 - 7:45	00:03:00	No Record	0
December	2013	2013-12-26	Phrynonax poecilonotus	Neotropical Bird Snake	Reptile	1	Waning Crescent (37.9% Full)	Dark	Dry	5:30 - 7:45	00:03:00	No Record	0
December	2013	2013-12-26	Phrynonax poecilonotus	Neotropical Bird Snake	Reptile	1	Waning Crescent (36.9% Full)	Dark	Dry	7:30 - 10:00	00:03:00	No Record	2.5
December	2013	2013-12-27	Leptodeira septentrionalis	Northern Cat-eyed Snake	Reptile	1	Waning Crescent (26.7% Full)	Dark	Dry	8:00 - 10:00	00:54:00	No Record	2
December	2013	2013-12-28	Leptodeira septentrionalis	Northern Cat-eyed Snake	Reptile	1	Waning Crescent (18.2% Full)	Dark	Dry	6:00 - 8:30	01:54:00	No Record	2.5
December	2013	2013-12-29	Leptodeira septentrionalis	Northern Cat-eyed Snake	Reptile	1	Waning Crescent 10.3(% Full)	Dark	Dry	6:00 - 8:00	02:46:00	No Record	2
December	2013	2013-12-30	Leptodeira septentrionalis	Northern Cat-eyed Snake	Reptile	2	Waning Crescent (3.8% Full)	Dark	Dry	8:00 - 10:00	03:46:00	No Record	2
January	2014	2014-01-01	Imantodes cenchoa	Chunk-headed Snake	Reptile	1	New Moon (0.2% Full)	Dark	Rainy	8:00 - 10:00	05:50:00	17:55:00	2
January	2014	2014-01-02	Imantodes cenchoa	Chunk-headed Snake	Reptile	1	Waxing Crescent (2.9% Full)	Dark	Dry	7:30 - 10:00	06:50:00	18:58:00	2.5
January	2014	2014-01-04	Leptodeira septentrionalis	Northern Cat-eyed Snake	Reptile	1	Waxing Crescent (15.4% Full)	Dark	Light Rain	5:30 - 7:45	08:39:00	20:56:00	2.75
January	2014	2014-01-04	Imantodes cenchoa	Chunk-headed Snake	Reptile	1	Waxing Crescent (16.3% Full)	Dark	Dry	7:30 - 10:00	08:39:00	20:56:00	2.5
January	2014	2014-01-04	Leptodeira septentrionalis	Northern Cat-eyed Snake	Reptile	1	Waxing Crescent (16.3% Full)	Dark	Dry	7:30 - 10:00	08:39:00	20:56:00	0
January	2014	2014-01-07	Leptodeira septentrionalis	Northern Cat-eyed Snake	Reptile	1	First Quarter (45.6% Full)	Dark	Dry	5:30 - 7:30	11:02:00	23:36:00	2
January	2014	2014-01-10	Imantodes cenchoa	Chunk-headed Snake	Reptile	1	Waxing Gibbous (75.4% Full)	Semi-bright	Dry	6:00 - 8:00	13:20:00	01:17:00	2
January	2014	2014-01-10	Mastigodryas melanolomus	Juvenile Neotropical Racer	Reptile	1	Waxing Gibbous (75.4% Full)	Semi-bright	Dry	6:00 - 8:00	13:20:00	01:17:00	0
January	2014	2014-01-10	Mastigodryas melanolomus	Juvenile Neotropical Racer	Reptile	1	Waxing Gibbous (76% Full)	Semi-bright	Dry	7:45 - 10:00	13:20:00	01:17:00	0
January	2014	2014-01-10	Siphlophis compressus	Red-eyed Tree Snake	Reptile	1	Waxing Gibbous (76% Full)	Semi-bright	Dry	7:45 - 10:00	13:20:00	01:17:00	2.25
January	2014	2014-01-11	Leptodeira septentrionalis	Northern Cat-eyed Snake	Reptile	1	Waxing Gibbous (83.7% Full)	Bright	Dry	7:30 - 10:30	14:07:00	02:06:00	3
January	2014	2014-01-13	Imantodes cenchoa	Chunk-headed Snake	Reptile	1	Waxing Gibbous (95.2% Full)	Bright	Dry	7:30 - 10:00	15:43:00	03:45:00	2.5
January	2014	2014-01-15	Leptodeira septentrionalis	Northern Cat-eyed Snake	Reptile	1	Full Moon (99.9% Full)	Bright	Dry	7:30 - 10:00	17:19:00	05:18:00	2.5
January	2014	2014-01-16	Leptodeira septentrionalis	Northern Cat-eyed Snake	Reptile	1	Waning Gibbous (99.6% Full)	Bright	Dry	7:30 - 10:30	18:06:00	06:02:00	3
January	2014	2014-01-25	Imantodes cenchoa	Chunk-headed Snake	Reptile	2	Waning Crescent (32.7% Full)	Dark	Dry	7:30 - 10:30	00:32:00	12:35:00	3
January	2014	2014-01-25	Leptodeira septentrionalis	Northern Cat-eyed Snake	Reptile	1	Waning Crescent (32.7% Full)	Dark	Dry	7:30 - 10:30	00:32:00	12:35:00	0
January	2014	2014-01-26	Leptodeira septentrionalis	Northern Cat-eyed Snake	Reptile	1	Waning Crescent (22.6% Full)	Dark	Dry	7:30 - 10:30	01:29:00	13:31:00	3
January	2014	2014-01-26	Leptodeira septentrionalis	Northern Cat-eyed Snake	Reptile	1	Waning Crescent (22.6% Full)	Dark	Dry	7:30 - 10:30	01:29:00	13:31:00	0
January	2014	2014-01-28	Imantodes cenchoa	Chunk-headed Snake	Reptile	1	Waning Crescent (6.5% Full)	Dark	Dry	7:30 - 10:00	03:29:00	15:33:00	2.5
February	2014	2014-02-06	Imantodes cenchoa	Chunk-headed Snake	Reptile	1	First Quarter (50.3% Full)	Dark	Dry	7:30 - 10:30	11:16:00	none	3
February	2014	2014-02-06	Ninia maculata	Banded Coffee Snake	Reptile	1	First Quarter (50.3% Full)	Dark	Dry	7:30 - 10:30	11:16:00	none	0
February	2014	2014-02-10	Leptophis ahaetulla	Giant Parrot Snake	Reptile	1	Waxing Gibbous (85.2% Full)	Dark	Dry	7:30 - 10:15	14:28:00	02:29:00	2.75
February	2014	2014-02-11	Enuliophis sclateri	Sock-headed Snake	Reptile	4	Waxing Gibbous (91.1% Full)	Bright	Dry	7:30 - 10:15	15:15:00	03:15:00	2.75
February	2014	2014-02-13	Leptodeira septentrionalis	Northern Cat-eyed Snake	Reptile	1	Waxing Gibbous (98.6% Full)	Bright	Dry	6:00 - 8:00	16:50:00	04:43:00	2
February	2014	2014-02-13	Leptodeira septentrionalis	Northern Cat-eyed Snake	Reptile	1	Waxing Gibbous (98.8% Full)	Bright	Dry	8:00 - 10:00	16:50:00	04:43:00	0
February	2014	2014-02-13	Mastigodryas melanolomus	Neotropical Racer	Reptile	1	Waxing Gibbous (98.8% Full)	Bright	Dry	8:00 - 10:00	16:50:00	04:43:00	2
February	2014	2014-02-16	Imantodes cenchoa	Chunk-headed Snake	Reptile	1	Waning Gibbous(96.9% Full)	Bright	Dry	7:30 - 10:15	19:08:00	06:48:00	0
February	2014	2014-02-16	Leptodeira septentrionalis	Northern Cat-eyed Snake	Reptile	1	Waning Gibbous(96.9% Full)	Bright	Dry	7:30 - 10:15	19:08:00	06:48:00	2.75
February	2014	2014-02-17	Enuliophis sclateri	Sock-headed Snake	Reptile	1	Waning Gibbous(92.7% Full)	Bright	Dry	6:00 - 8:00	19:55:00	07:29:00	2
February	2014	2014-02-17	Leptodeira septentrionalis	Northern Cat-eyed Snake	Reptile	1	Waning Gibbous(92.7% Full)	Bright	Dry	6:00 - 8:00	19:55:00	07:29:00	0
February	2014	2014-02-21	Leptodeira septentrionalis	Northern Cat-eyed Snake	Reptile	1	Waning Gibbous(60.3% Full)	Dark	Dry	5:30 - 7:45	23:20:00	10:30:00	2.25
February	2014	2014-02-22	Imantodes cenchoa	Chunk-headed Snake	Reptile	1	Last Quarter (48.5% Full)	Dark	Dry	7:30 - 10:30	-	11:22:00	3
February	2014	2014-02-22	Leptodeira septentrionalis	Northern Cat-eyed Snake	Reptile	1	Last Quarter (48.5% Full)	Dark	Dry	7:30 - 10:30	-	11:22:00	0
February	2014	2014-02-23	Leptodeira septentrionalis	Northern Cat-eyed Snake	Reptile	1	Waning Crescent (37.4% Full)	Dark	Dry	7:30 - 10:30	00:17:00	12:18:00	3
February	2014	2014-02-24	Leptodeira septentrionalis	Northern Cat-eyed Snake	Reptile	1	Waning Crescent (26.8% Full)	Dark	Dry	7:30 - 10:10	01:15:00	13:17:00	2.75
February	2014	2014-02-25	Imantodes cenchoa	Chunk-headed Snake	Reptile	1	Waning Crescent (17.6% Full)	Dark	Dry	7:30 - 10:30	02:13:00	14:17:00	3
February	2014	2014-02-25	Leptodeira septentrionalis	Northern Cat-eyed Snake	Reptile	1	Waning Crescent (17.6% Full)	Dark	Dry	7:30 - 10:30	02:13:00	14:17:00	0
February	2014	2014-02-25	Leptodeira septentrionalis	Northern Cat-eyed Snake	Reptile	1	Waning Crescent (17.6% Full)	Dark	Dry	7:30 - 10:30	02:13:00	14:17:00	0
February	2014	2014-02-27	Imantodes cenchoa	Chunk-headed Snake	Reptile	1	Waning Crescent (3.3% Full)	Dark	Dry	7:30 - 10:30	04:06:00	16:18:00	3
February	2014	2014-02-27	Leptodeira septentrionalis	Northern Cat-eyed Snake	Reptile	3	Waning Crescent (3.3% Full)	Dark	Dry	7:30 - 10:30	04:06:00	16:18:00	0
February	2014	2014-02-28	Leptodeira septentrionalis	Northern Cat-eyed Snake	Reptile	1	Waning Crescent (0.4% Full)	Dark	Light Rain	7:30 - 10:30	05:00:00	17:17:00	3
March	2014	2014-03-01	Bothriechis schlegelii	Eyelash Palm Pit Viper	Reptile	1	New Moon (0.3% Full)	Dark	Dry	7:30 - 10:20	05:51:00	18:14:00	3
March	2014	2014-03-01	Leptodeira septentrionalis	Northern Cat-eyed Snake	Reptile	1	New Moon (0.3% Full)	Dark	Dry	7:30 - 10:20	05:51:00	18:14:00	0
March	2014	2014-03-03	Dendrophidion percarinatum	Barred Forest Racer	Reptile	1	Waxing Crescent (5.6% Full)	Dark	Dry	7:30 - 10:20	07:30:00	20:05:00	3
March	2014	2014-03-07	Leptodeira septentrionalis	Northern Cat-eyed Snake	Reptile	1	Waxing Crescent (42.9% Full)	Dark	Dry	7:30 - 10:15	10:45:00	23:34:00	2.75
March	2014	2014-03-08	Leptodeira septentrionalis	Northern Cat-eyed Snake	Reptile	2	First Quarter (52.6% Full)	Dark	Dry	7:30 - 10:15	11:34:00	-	2.75
March	2014	2014-03-10	Leptodeira septentrionalis	Northern Cat-eyed Snake	Reptile	1	Waxing Gibbous (71.1% Full)	Bright	Dry	7:30 - 10:20	13:11:00	01:11:00	3
March	2014	2014-03-10	Siphlophis compressus	Red-eyed Tree Snake	Reptile	1	Waxing Gibbous (71.1% Full)	Bright	Dry	7:30 - 10:20	13:11:00	01:11:00	0
March	2014	2014-03-12	Imantodes cenchoa	Chunk-headed Snake	Reptile	1	Waxing Gibbous (86.3% Full)	Bright	Dry	7:30 - 10:30	14:45:00	02:40:00	3
March	2014	2014-03-14	Leptodeira septentrionalis	Northern Cat-eyed Snake	Reptile	1	Waxing Gibbous (96.6% Full)	Bright	Dry	7:30 - 10:15	16:18:00	04:04:00	2.75
March	2014	2014-03-16	Leptophis ahaetulla	Giant Parrot Snake	Reptile	1	Full Moon (100% Full)	Bright	Dry	6:00 - 8:00	17:52:00	05:27:00	2
March	2014	2014-03-17	Leptodeira septentrionalis	Northern Cat-eyed Snake	Reptile	1	Waning Gibbbous (98.7% Full)	Bright	Dry	7:30 - 10:15	18:40:00	06:09:00	2.75
March	2014	2014-03-17	Leptophis ahaetulla	Giant Parrot Snake	Reptile	1	Waning Gibbbous (98.7% Full)	Bright	Dry	7:30 - 10:15	18:40:00	06:09:00	0
March	2014	2014-03-25	Leptodeira septentrionalis	Northern Cat-eyed Snake	Reptile	1	Waning Crescent (31.1% Full)	Dark	Dry	5:30 - 7:45	01:01:00	13:06:00	2.25
March	2014	2014-03-27	Imantodes cenchoa	Chunk-headed Snake	Reptile	1	Waning Crescent (11.5% Full)	Dark	Dry	7:30 - 10:15	02:48:00	15:02:00	2.75
March	2014	2014-03-29	Leptodeira septentrionalis	Northern Cat-eyed Snake	Reptile	1	Waning Crescent (1.4% Full)	Dark	Dry	5:30 - 7:45	04:29:00	16:54:00	2.25
March	2014	2014-03-29	Enuliophis sclateri	Sock-headed Snake	Reptile	1	Waning Crescent (1.2% Full)	Dark	Dry	7:30 - 10:30	04:29:00	16:54:00	3
March	2014	2014-03-29	Leptodeira septentrionalis	Northern Cat-eyed Snake	Reptile	1	Waning Crescent (1.2% Full)	Dark	Dry	7:30 - 10:30	04:29:00	16:54:00	0
March	2014	2014-03-31	Leptodeira septentrionalis	Northern Cat-eyed Snake	Reptile	1	Waxing Crescent (1.4% Full)	Dark	Dry	7:30 - 10:15	06:07:00	18:44:00	2.75
April	2014	2014-04-01	Leptodeira septentrionalis	Northern Cat-eyed Snake	Reptile	1	Waxing Crescent (5.3% Full)	Dark	Dry	8:00 - 10:00	05:56:00	19:38:00	2
April	2014	2014-04-02	Leptodeira septentrionalis	Northern Cat-eyed Snake	Reptile	1	Waxing Crescent (10.4% Full)	Dark	Dry	5:30 - 7:45	07:45:00	20:32:00	2.25
April	2014	2014-04-02	Leptodeira septentrionalis	Northern Cat-eyed Snake	Reptile	1	Waxing Crescent (11.1% Full)	Dark	Dry	7:30 - 10:30	07:45:00	20:32:00	3
April	2014	2014-04-03	Boa imperator	Boa Constrictor	Reptile	1	Waxing Crescent (18.2% Full)	Dark	Dry	7:30 - 10:15	08:35:00	21:24:00	2.75
April	2014	2014-04-07	Siphlophis compressus	Red-eyed Tree Snake	Reptile	1	First Quarter (54.5% Full)	Dark	Dry	7:30 - 10:15	11:52:00	-	2.75
April	2014	2014-04-08	Leptodeira septentrionalis	Northern Cat-eyed Snake	Reptile	2	Waxing Gibbous (64.8% Full)	Dark	Dry	7:30 - 10:15	12:39:00	00:35:00	2.75
April	2014	2014-04-13	Bothriechis schlegelii	Eyelash Palm Pit Viper	Reptile	1	Waxing Gibbous (97.7% Full)	Bright	Dry	8:00 - 9:30	16:34:00	04:05:00	0
April	2014	2014-04-13	Leptodeira septentrionalis	Northern Cat-eyed Snake	Reptile	1	Waxing Gibbous (97.7% Full)	Bright	Dry	8:00 - 9:30	16:34:00	04:05:00	1.5
April	2014	2014-04-14	Leptodeira septentrionalis	Northern Cat-eyed Snake	Reptile	1	Waxing Gibbous (99.7% Full)	Bright	Dry	6:00 - 8:00	17:24:00	04:48:00	2
April	2014	2014-04-15	Leptodeira septentrionalis	Northern Cat-eyed Snake	Reptile	1	Full Moon (99.8% Full)	Dark	Dry	6:00 - 8:00	18:16:00	05:34:00	2
April	2014	2014-04-15	Leptophis ahaetulla	Giant Parrot Snake	Reptile	1	Full Moon (99.8% Full)	Dark	Dry	6:00 - 8:00	18:16:00	05:34:00	0
April	2014	2014-04-18	Leptodeira septentrionalis	Northern Cat-eyed Snake	Reptile	1	Waning Gibbous (85.6% Full)	Dark	Dry	7:30 - 10:15	21:03:00	08:08:00	2.75
April	2014	2014-04-20	Leptodeira septentrionalis	Northern Cat-eyed Snake	Reptile	1	Waning Gibbous (67.4% Full)	Dark	Dry	6:00 - 8:00	22:57:00	10:03:00	2
April	2014	2014-04-20	Leptodeira septentrionalis	Northern Cat-eyed Snake	Reptile	1	Waning Gibbous (66.4% Full)	Dark	Dry	8:00 - 10:00	22:57:00	10:03:00	2
April	2014	2014-04-21	Imantodes cenchoa	Chunk-headed Snake	Reptile	3	Waning Gibbous (55.3% Full)	Dark	Dry	8:00 - 10:00	23:51:00	11:01:00	2
April	2014	2014-04-23	Leptodeira septentrionalis	Northern Cat-eyed Snake	Reptile	1	Waning Crescent (33% Full)	Dark	Dry	7:30 - 10:30	00:43:00	12:55:00	3
April	2014	2014-04-26	Imantodes cenchoa	Chunk-headed Snake	Reptile	1	Waning Crescent (7.2% Full)	Dark	Dry	6:00 - 8:00	03:10:00	15:38:00	2
April	2014	2014-04-26	Imantodes cenchoa	Chunk-headed Snake	Reptile	1	Waning Crescent (7% Full)	Dark	Dry	7:30 - 10:20	03:10:00	15:38:00	0
April	2014	2014-04-26	Leptodeira septentrionalis	Northern Cat-eyed Snake	Reptile	4	Waning Crescent (7% Full)	Dark	Dry	7:30 - 10:20	03:10:00	15:38:00	2.75
April	2014	2014-04-26	Mastigodryas melanolomus	Neotropical Racer	Reptile	1	Waning Crescent (7% Full)	Dark	Dry	7:30 - 10:20	03:10:00	15:38:00	0
April	2014	2014-04-27	Leptodeira septentrionalis	Northern Cat-eyed Snake	Reptile	2	Waning Crescent (2.4% Full)	Dark	Dry	7:30 - 10:20	03:58:00	16:32:00	2.75
April	2014	2014-04-28	Imantodes cenchoa	Chunk-headed Snake	Reptile	1	Waning Crescent (0.2% Full)	Dark	Light Rain	8:00 - 10:00	04:46:00	17:26:00	0
April	2014	2014-04-28	Leptodeira septentrionalis	Northern Cat-eyed Snake	Reptile	1	Waning Crescent (0.2% Full)	Dark	Light Rain	8:00 - 10:00	04:46:00	17:26:00	2
April	2014	2014-04-29	Imantodes cenchoa	Chunk-headed Snake	Reptile	1	New Moon (0.4% Full)	Dark	Dry	7:30 - 10:00	05:35:00	18:20:00	2.5
May	2014	2014-05-01	Leptodeira septentrionalis	Northern Cat-eyed Snake	Reptile	2	Waxing Crescent (7.3% Full)	Dark	Light Rain	8:00 - 10:00	07:15:00	20:05:00	2
May	2014	2014-05-03	Leptodeira septentrionalis	Northern Cat-eyed Snake	Reptile	2	Waxing Crescent (20.5% Full)	Dark	Dry	7:30 - 10:30	08:55:00	21:43:00	3
May	2014	2014-05-07	Leptodeira septentrionalis	Northern Cat-eyed Snake	Reptile	1	Waxing Gibbous (56.8% Full)	Dark	Dry	8:00 - 9:30	12:05:00	-	1.5
May	2014	2014-05-10	Imantodes cenchoa	Chunk-headed Snake	Reptile	1	Waxing Gibbous (83.1% Full)	Dark	Rainy	7:30 - 10:30	14:24:00	01:59:00	3
May	2014	2014-05-12	Imantodes cenchoa	Chunk-headed Snake	Reptile	1	Waxing Gibbous (95.6% Full)	Bright	Dry	7:30 - 10:30	16:05:00	03:26:00	3
May	2014	2014-05-16	Imantodes cenchoa	Chunk-headed Snake	Reptile	1	Waning Gibbous (94.5% Full)	Dark	Rainy	7:30 - 10:30	19:52:00	06:56:00	3
May	2014	2014-05-21	Siphlophis compressus	Red-eyed Tree Snake	Reptile	1	Last Quarter (46.8% Full)	Dark	Light Rain	7:30 - 10:30	-	11:47:00	3
May	2014	2014-05-23	Leptodeira septentrionalis	Northern Cat-eyed Snake	Reptile	1	Waning Crescent (25.7% Full)	Dark	Dry	6:00 - 10:00	01:07:00	13:33:00	2
May	2014	2014-05-29	Leptodeira septentrionalis	Northern Cat-eyed Snake	Reptile	1	Waxing Crescent (1.2% Full)	Dark	Light Rain	8:00 - 10:00	05:57:00	18:47:00	2
June	2014	2014-06-03	Leptodeira septentrionalis	Northern Cat-eyed Snake	Reptile	1	Waxing Crescent (31.3% Full)	Dark	Dry	7:30 - 10:30	09:59:00	22:33:00	3
June	2014	2014-06-04	Imantodes cenchoa	Chunk-headed Snake	Reptile	1	Waxing Crescent (40.2% Full)	Dark	Dry	7:30 - 10:30	10:45:00	23:13:00	3
June	2014	2014-06-05	Leptodeira septentrionalis	Northern Cat-eyed Snake	Reptile	1	First Quarter (49.3% Full)	Dark	Dry	6:30 - 9:30	11:30:00	23:54:00	3
June	2014	2014-06-05	Siphlophis compressus	Red-eyed Tree Snake	Reptile	1	First Quarter (49.3% Full)	Dark	Dry	6:30 - 9:30	11:30:00	23:54:00	0
June	2014	2014-06-10	Imantodes cenchoa	Chunk-headed Snake	Reptile	1	Waxing Gibbous (92.8% Full)	Bright	Dry	7:30 - 10:15	15:40:00	02:51:00	2.75
June	2014	2014-06-11	Corallus ruschenbergerii	Northern Tree Boa	Reptile	1	Waxing Gibbous (97.2% Full)	Dark	Dry	5:30 - 8:30	16:38:00	03:44:00	3
June	2014	2014-06-12	Leptodeira septentrionalis	Northern Cat-eyed Snake	Reptile	1	Full Moon (99.8% Full)	Dark	Dry	7:30 - 9:45	17:37:00	04:40:00	2.75
June	2014	2014-06-13	Imantodes cenchoa	Chunk-headed Snake	Reptile	1	Waning Gibbous (99.3% Full)	Dark	Light Rain	7:30 - 10:15	18:38:00	05:40:00	2.75
June	2014	2014-06-14	Enuliophis sclateri	Sock-headed Snake	Reptile	1	Waning Gibbous (95.8% Full)	Bright	Dry	7:30 - 10:30	19:37:00	06:42:00	3
June	2014	2014-06-14	Leptodeira septentrionalis	Northern Cat-eyed Snake	Reptile	1	Waning Gibbous (95.8% Full)	Bright	Dry	7:30 - 10:30	19:37:00	06:42:00	0
June	2014	2014-06-17	Boa imperator	Boa Constrictor	Reptile	1	Waning Gibbous (71.6% Full)	Dark	Dry	7:30 - 10:30	22:18:00	09:41:00	3
June	2014	2014-06-17	Enuliophis sclateri	Sock-headed Snake	Reptile	1	Waning Gibbous (71.6% Full)	Dark	Dry	7:30 - 10:30	22:18:00	09:41:00	0
June	2014	2014-06-18	Boa imperator	Boa Constrictor	Reptile	1	Waning Gibbous (60.7% Full)	Dark	Dry	7:30 - 10:15	23:06:00	10:37:00	2.75
June	2014	2014-06-18	Imantodes cenchoa	Chunk-headed Snake	Reptile	1	Waning Gibbous (60.7% Full)	Dark	Dry	7:30 - 10:15	23:06:00	10:37:00	0
June	2014	2014-06-19	Leptodeira septentrionalis	Northern Cat-eyed Snake	Reptile	1	Last Quarter (49.2% Full)	Dark	Dry	7:30 - 10:15	23:53:00	11:30:00	2.75
June	2014	2014-06-22	Imantodes cenchoa	Chunk-headed Snake	Reptile	1	Waning Crescent (18.9% Full)	Dark	Light Rain	8:00 - 9:45	01:27:00	14:07:00	1.75
June	2014	2014-06-22	Leptodeira septentrionalis	Northern Cat-eyed Snake	Reptile	1	Waning Crescent (18.9% Full)	Dark	Light Rain	8:00 - 9:45	01:27:00	14:07:00	0
June	2014	2014-06-24	Enuliophis sclateri	Sock-headed Snake	Reptile	1	Waning Crescent (6.3% Full)	Dark	Light Rain	8:00 - 10:00	03:03:00	15:51:00	2
June	2014	2014-06-24	Leptodeira septentrionalis	Northern Cat-eyed Snake	Reptile	2	Waning Crescent (6.3% Full)	Dark	Light Rain	8:00 - 10:00	03:03:00	15:51:00	0
June	2014	2014-06-25	Leptodeira septentrionalis	Northern Cat-eyed Snake	Reptile	1	Waning Crescent (2.2% Full)	Dark	Light Rain	7:30 - 10:15	03:52:00	16:42:00	2.75
June	2014	2014-06-27	Mastigodryas melanolomus	Neotropical Racer	Reptile	1	New Moon (0.3% Full)	Dark	Dry	8:00 - 10:00	05:31:00	18:19:00	2
June	2014	2014-06-30	Leptodeira septentrionalis	Northern Cat-eyed Snake	Reptile	1	Waxing Crescent (11.2% Full)	Dark	Rainy	8:00 - 10:00	07:55:00	20:30:00	2
July	2014	2014-07-02	Leptodeira septentrionalis	Northern Cat-eyed Snake	Reptile	1	Waxing Crescent (25.3% Full)	Dark	Dry	7:30 - 10:15	09:26:00	21:51:00	2.75
July	2014	2014-07-02	Mastigodryas melanolomus	Neotropical Racer	Reptile	1	Waxing Crescent (25.3% Full)	Dark	Dry	7:30 - 10:15	09:26:00	21:51:00	0
July	2014	2014-07-06	Leptodeira septentrionalis	Northern Cat-eyed Snake	Reptile	2	Waxing Gibbous (63.8% Full)	Dark	Rainy	8:00 - 10:30	12:33:00	-	2.5
July	2014	2014-07-07	Bothrops asper	Fer-de-lance	Reptile	1	Waxing Gibbous (73.3% Full)	Bright	Dry	7:30 - 10:15	13:25:00	00:41:00	0
July	2014	2014-07-07	Leptodeira septentrionalis	Northern Cat-eyed Snake	Reptile	1	Waxing Gibbous (73.3% Full)	Bright	Dry	7:30 - 10:15	13:25:00	00:41:00	2.75
July	2014	2014-07-11	Imantodes cenchoa	Chunk-headed Snake	Reptile	1	Waxing Gibbous (99.2% Full)	Bright	Dry	6:00 - 8:00	17:19:00	04:22:00	2
July	2014	2014-07-11	Leptodeira septentrionalis	Northern Cat-eyed Snake	Reptile	1	Waxing Gibbous (99.2% Full)	Bright	Dry	6:00 - 8:00	17:19:00	04:22:00	0
July	2014	2014-07-15	Leptodeira septentrionalis	Northern Cat-eyed Snake	Reptile	1	Waning Gibbous (83.5% Full)	Dark	Light Rain	8:00 - 10:00	21:01:00	08:27:00	2
July	2014	2014-07-16	Corallus ruschenbergerii	Northern Tree Boa	Reptile	1	Waning Gibbous (74.2% Full)	Dark	Dry	7:30 - 10:30	21:50:00	09:23:00	3
July	2014	2014-07-16	Siphlophis compressus	Red-eyed Tree Snake	Reptile	1	Waning Gibbous (74.2% Full)	Dark	Dry	7:30 - 10:30	21:50:00	09:23:00	0
August	2014	2014-08-01	Leptodeira septentrionalis	Northern Cat-eyed Snake	Reptile	2	Waxing Crescent (28.6% Full)	Dark	Dry	7:30 - 10:30	09:40:00	21:53:00	3
August	2014	2014-08-04	Imantodes cenchoa	Chunk-headed Snake	Reptile	1	Waxing Gibbous (58.9% Full)	Dark	Light Rain	8:00 - 10:00	12:09:00	-	0
August	2014	2014-08-04	Leptodeira septentrionalis	Northern Cat-eyed Snake	Reptile	1	Waxing Gibbous (58.9% Full)	Dark	Light Rain	8:00 - 10:00	12:09:00	-	2
August	2014	2014-08-05	Enuliophis sclateri	Sock-headed Snake	Reptile	1	Waxing Gibbous (69% Full)	Dark	Dry	7:30 - 10:15	13:04:00	00:12:00	2.75
August	2014	2014-08-05	Imantodes cenchoa	Chunk-headed Snake	Reptile	1	Waxing Gibbous (69% Full)	Dark	Dry	7:30 - 10:15	13:04:00	00:12:00	0
August	2014	2014-08-06	Imantodes cenchoa	Chunk-headed Snake	Reptile	1	Waxing Gibbous (79% Full)	Dark	Dry	7:30 - 10:30	14:02:00	01:06:00	0
August	2014	2014-08-06	Leptodeira septentrionalis	Northern Cat-eyed Snake	Reptile	1	Waxing Gibbous (79% Full)	Dark	Dry	7:30 - 10:30	14:02:00	01:06:00	3
August	2014	2014-08-06	Leptodeira septentrionalis	Northern Cat-eyed Snake	Reptile	1	Waxing Gibbous (79% Full)	Dark	Dry	7:30 - 10:30	14:02:00	01:06:00	0
August	2014	2014-08-08	Siphlophis compressus	Red-eyed Tree Snake	Reptile	1	Waxing Gibbous (94.3% Full)	Bright	Dry	7:30 - 10:30	16:00:00	03:04:00	3
August	2014	2014-08-09	Enuliophis sclateri	Sock-headed Snake	Reptile	1	Waxing Gibbous (98.7% Full)	Bright	Dry	7:30 - 10:30	16:58:00	04:06:00	3
August	2014	2014-08-12	Leptodeira septentrionalis	Northern Cat-eyed Snake	Reptile	1	Waning Gibbous (93.3% Full)	Dark	Dry	8:00 - 10:00	19:39:00	07:08:00	2
August	2014	2014-08-18	Leptodeira septentrionalis	Northern Cat-eyed Snake	Reptile	1	Waning Crescent (36.6% Full)	Dark	Dry	7:30 - 10:15	-	12:35:00	2.75
August	2014	2014-08-19	Leptodeira septentrionalis	Northern Cat-eyed Snake	Reptile	1	Waning Crescent (27.5% Full)	Dark	Dry	7:30 - 10:30	00:36:00	13:25:00	3
August	2014	2014-08-19	Leptodeira septentrionalis	Northern Cat-eyed Snake	Reptile	1	Waning Crescent (27.5% Full)	Dark	Dry	7:30 - 10:30	00:36:00	13:25:00	0
August	2014	2014-08-20	Leptodeira septentrionalis	Northern Cat-eyed Snake	Reptile	1	Waning Crescent (19.3% Full)	Dark	Light Rain	7:30 - 10:30	01:25:00	14:14:00	3
August	2014	2014-08-21	Enuliophis sclateri	Sock-headed Snake	Reptile	1	Waning Crescent (12.1% Full)	Dark	Dry	8:00 - 10:00	02:14:00	15:00:00	0
August	2014	2014-08-21	Imantodes cenchoa	Chunk-headed Snake	Reptile	2	Waning Crescent (12.1% Full)	Dark	Dry	8:00 - 10:00	02:14:00	15:00:00	2
August	2014	2014-08-24	Leptodeira septentrionalis	Northern Cat-eyed Snake	Reptile	1	Waning Crescent (0.5% Full)	Dark	Dry	7:30 - 10:15	04:35:00	17:10:00	2.75
August	2014	2014-08-26	Leptodeira septentrionalis	Northern Cat-eyed Snake	Reptile	1	Waxing Crescent (1.4% Full)	Dark	Light Rain	8:00 - 10:00	06:06:00	18:31:00	2
August	2014	2014-08-27	Imantodes cenchoa	Chunk-headed Snake	Reptile	1	Waxing Crescent (4.5% Full)	Dark	Light Rain	7:30 - 10:45	06:52:00	19:11:00	3.25
August	2014	2014-08-29	Leptodeira septentrionalis	Northern Cat-eyed Snake	Reptile	2	Waxing Crescent (16% Full)	Dark	Dry	7:30 - 10:20	09:13:00	21:20:00	2.75
August	2014	2014-08-31	Imantodes cenchoa	Chunk-headed Snake	Reptile	1	Waxing Crescent (33.2% Full)	Dark	Dry	7:30 - 10:30	10:04:00	22:07:00	0
August	2014	2014-08-31	Leptodeira septentrionalis	Northern Cat-eyed Snake	Reptile	2	Waxing Crescent (33.2% Full)	Dark	Dry	7:30 - 10:30	10:04:00	22:07:00	3
August	2014	2014-08-31	Siphlophis compressus	Red-eyed Tree Snake	Reptile	1	Waxing Crescent (33.2% Full)	Dark	Dry	7:30 - 10:30	10:04:00	22:07:00	0
September	2014	2014-09-01	Enuliophis sclateri	Sock-headed Snake	Reptile	1	Waxing Crescent (43.4% Full)	Dark	Dry	7:30 - 11:00	10:56:00	22:58:00	0
September	2014	2014-09-01	Leptodeira septentrionalis	Northern Cat-eyed Snake	Reptile	2	Waxing Crescent (43.4% Full)	Dark	Dry	7:30 - 11:00	10:56:00	22:58:00	3.5
September	2014	2014-09-01	Siphlophis compressus	Red-eyed Tree Snake	Reptile	1	Waxing Crescent (43.4% Full)	Dark	Dry	7:30 - 11:00	10:56:00	22:58:00	0
September	2014	2014-09-03	Imantodes cenchoa	Chunk-headed Snake	Reptile	1	Waxing Gibbous (65% Full)	Dark	Light Rain	7:30 - 10:30	12:48:00	-	3
September	2014	2014-09-03	Leptodeira septentrionalis	Northern Cat-eyed Snake	Reptile	1	Waxing Gibbous (65% Full)	Dark	Light Rain	7:30 - 10:30	12:48:00	-	0
September	2014	2014-09-05	Leptodeira septentrionalis	Northern Cat-eyed Snake	Reptile	1	Waxing Gibbous (86.2% Full)	Bright	Dry	8:00 - 10:00	14:42:00	01:49:00	0
September	2014	2014-09-05	Mastigodryas melanolomus	Neotropical Racer	Reptile	1	Waxing Gibbous (86.2% Full)	Bright	Dry	8:00 - 10:00	14:42:00	01:49:00	2
September	2014	2014-09-06	Imantodes cenchoa	Chunk-headed Snake	Reptile	1	Waxing Gibbous (92.6% Full)	Bright	Light Rain	7:30 - 10:30	15:37:00	02:49:00	3
September	2014	2014-09-07	Leptodeira septentrionalis	Northern Cat-eyed Snake	Reptile	1	Waxing Gibbous (97.74% Full)	Semi-bright	Rainy	7:30 - 10:30	16:31:00	03:49:00	3
September	2014	2014-09-11	Imantodes cenchoa	Chunk-headed Snake	Reptile	1	Waning Gibbous (89.5% Full)	Dark	Light Rain	7:30 - 10:30	19:57:00	07:42:00	0
September	2014	2014-09-11	Leptodeira septentrionalis	Northern Cat-eyed Snake	Reptile	1	Waning Gibbous (89.5% Full)	Dark	Light Rain	7:30 - 10:30	19:57:00	07:42:00	3
September	2014	2014-09-15	Leptodeira septentrionalis	Northern Cat-eyed Snake	Reptile	4	Last Quarter (52.5% Full)	Dark	Light Rain	7:30 - 10:30	23:20:00	11:19:00	3
September	2014	2014-09-15	Siphlophis compressus	Red-eyed Tree Snake	Reptile	1	Last Quarter (52.5% Full)	Dark	Light Rain	7:30 - 10:30	23:20:00	11:19:00	0
September	2014	2014-09-16	Corallus ruschenbergerii	Northern Tree Boa	Reptile	1	Waning Crescent (42.6% Full)	Dark	Dry	7:30 - 10:45	-	00:09:00	3.25
September	2014	2014-09-16	Enuliophis sclateri	Sock-headed Snake	Reptile	1	Waning Crescent (42.6% Full)	Dark	Dry	7:30 - 10:45	-	00:09:00	0
September	2014	2014-09-16	Leptodeira septentrionalis	Northern Cat-eyed Snake	Reptile	1	Waning Crescent (42.6% Full)	Dark	Dry	7:30 - 10:45	-	00:09:00	0
September	2014	2014-09-16	Mastigodryas melanolomus	Neotropical Racer	Reptile	1	Waning Crescent (42.6% Full)	Dark	Dry	7:30 - 10:45	-	00:09:00	0
October	2014	2014-10-17	Enuliophis sclateri	Sock-headed Snake	Reptile	1	Waning Crescent (31.4% Full)	Dark	Light Rain	7:00 - 10:00	00:28:00	13:05:00	0
October	2014	2014-10-17	Leptodeira septentrionalis	Northern Cat-eyed Snake	Reptile	2	Waning Crescent (31.4% Full)	Dark	Light Rain	7:00 - 10:00	00:28:00	13:05:00	3
October	2014	2014-10-18	Imantodes cenchoa	Chunk-headed Snake	Reptile	1	Waning Crescent (23.7% Full)	Dark	Rainy	7:30 - 10:00	01:14:00	13:47:00	2.5
October	2014	2014-10-18	Leptodeira septentrionalis	Northern Cat-eyed Snake	Reptile	1	Waning Crescent (23.7% Full)	Dark	Rainy	7:30 - 10:00	01:14:00	13:47:00	0
October	2014	2014-10-19	Enuliophis sclateri	Sock-headed Snake	Reptile	1	Waning Crescent (15.2% Full)	Dark	Dry	7:45 - 10:00	01:59:00	14:27:00	0
October	2014	2014-10-19	Leptodeira septentrionalis	Northern Cat-eyed Snake	Reptile	1	Waning Crescent (15.2% Full)	Dark	Dry	7:45 - 10:00	01:59:00	14:27:00	0
October	2014	2014-10-19	Siphlophis compressus	Red-eyed Tree Snake	Reptile	1	Waning Crescent (15.2% Full)	Dark	Dry	7:45 - 10:00	01:59:00	14:27:00	2.25
October	2014	2014-10-20	Imantodes cenchoa	Chunk-headed Snake	Reptile	1	Waning Crescent (9% Full)	Dark	Rainy	7:45 - 10:00	02:45:00	15:07:00	2.25
October	2014	2014-10-20	Leptodeira septentrionalis	Northern Cat-eyed Snake	Reptile	1	Waning Crescent (9% Full)	Dark	Rainy	7:45 - 10:00	02:45:00	15:07:00	0
October	2014	2014-10-22	Enuliophis sclateri	Sock-headed Snake	Reptile	1	Waning Crescent (1.1% Full)	Dark	Dry	7:45 - 10:15	04:18:00	16:32:00	2.5
October	2014	2014-10-22	Leptodeira septentrionalis	Northern Cat-eyed Snake	Reptile	1	Waning Crescent (1.1% Full)	Dark	Dry	7:45 - 10:15	04:18:00	16:32:00	0
November	2014	2014-11-05	Imantodes cenchoa	Chunk-headed Snake	Reptile	1	Waxing Gibbous (98.3% Full)	Dark	Light Rain	5:30 - 7:45	16:23:00	04:07:00	2.25
November	2014	2014-11-05	Imantodes cenchoa	Chunk-headed Snake	Reptile	1	Waxing Gibbous (99.6% Full)	Bright	Light Rain	7:30 - 10:30	16:23:00	04:07:00	3
November	2014	2014-11-07	Imantodes cenchoa	Chunk-headed Snake	Reptile	1	Waning Gibbous (98.9% Full)	Bright	Dry	8:00 - 10:00	18:06:00	05:59:00	2
November	2014	2014-11-07	Leptodeira septentrionalis	Northern Cat-eyed Snake	Reptile	1	Waning Gibbous (98.9% Full)	Bright	Dry	8:00 - 10:00	18:06:00	05:59:00	0
November	2014	2014-11-10	Leptodeira septentrionalis	Northern Cat-eyed Snake	Reptile	1	Waning Gibbous (83.6% Full)	Dark	Dry	7:30 - 10:30	20:43:00	08:41:00	3
November	2014	2014-11-12	Leptodeira septentrionalis	Northern Cat-eyed Snake	Reptile	2	Waning Gibbous (66.5% Full)	Dark	Dry	7:30 - 10:30	22:21:00	10:16:00	3
November	2014	2014-11-14	Leptodeira septentrionalis	Northern Cat-eyed Snake	Reptile	2	Last Quarter (48.2% Full)	Dark	Dry	7:30 - 10:30	23:54:00	11:43:00	3
November	2014	2014-11-15	Clelia clelia	Mussurana	Reptile	1	Waning Crescent (38.8% Full)	Dark	Dry	7:30 - 10:40	-	12:24:00	3.2
November	2014	2014-11-15	Leptodeira septentrionalis	Northern Cat-eyed Snake	Reptile	1	Waning Crescent (38.8% Full)	Dark	Dry	7:30 - 10:40	-	12:24:00	0
November	2014	2014-11-16	Leptodeira septentrionalis	Northern Cat-eyed Snake	Reptile	1	Waning Crescent (29.9% Full)	Dark	Rainy	7:30 - 10:00	00:39:00	13:04:00	2.5
November	2014	2014-11-18	Mastigodryas melanolomus	Neotropical Racer	Reptile	1	Waning Crescent (14% Full)	Dark	Dry	7:30 - 10:20	02:10:00	14:26:00	3
November	2014	2014-11-19	Leptodeira septentrionalis	Northern Cat-eyed Snake	Reptile	2	Waning Crescent (7.8% Full)	Dark	Dry	7:30 - 10:40	02:58:00	15:09:00	3.25
November	2014	2014-11-21	Corallus ruschenbergerii	Northern Tree Boa	Reptile	1	Waning Crescent (0.5% Full)	Dark	Rainy	7:30 - 10:20	04:39:00	16:44:00	3
November	2014	2014-11-22	Mastigodryas melanolomus	Neotropical Racer	Reptile	1	New Moon (0.1% Full)	Dark	Dry	7:30 - 10:26	05:33:00	17:36:00	3
November	2014	2014-11-24	Enuliophis sclateri	Sock-headed Snake	Reptile	1	Waxing Crescent (6.5% Full)	Dark	Dry	7:30 - 10:40	07:26:00	19:29:00	3
November	2014	2014-11-24	Imantodes cenchoa	Chunk-headed Snake	Reptile	1	Waxing Crescent (6.5% Full)	Dark	Dry	7:30 - 10:40	07:26:00	19:29:00	0
November	2014	2014-11-24	Imantodes cenchoa	Chunk-headed Snake	Reptile	1	Waxing Crescent (6.5% Full)	Dark	Dry	7:30 - 10:40	07:26:00	19:29:00	0
November	2014	2014-11-24	Leptodeira septentrionalis	Northern Cat-eyed Snake	Reptile	1	Waxing Crescent (6.5% Full)	Dark	Dry	7:30 - 10:40	07:26:00	19:29:00	0
November	2014	2014-11-26	Coniophanes fissidens	Brown Spotbelly	Reptile	1	Waxing Crescent (21.2% Full)	Dark	Dry	5:30 - 7:55	09:18:00	21:25:00	2.5
November	2014	2014-11-26	Leptodeira septentrionalis	Northern Cat-eyed Snake	Reptile	1	Waxing Crescent (21.2% Full)	Dark	Dry	5:30 - 7:55	09:18:00	21:25:00	0
November	2014	2014-11-26	Leptodeira septentrionalis	Northern Cat-eyed Snake	Reptile	1	Waxing Crescent (22.1% Full)	Dark	Dry	7:30 - 10:30	09:18:00	21:25:00	3
November	2014	2014-11-28	Leptodeira septentrionalis	Northern Cat-eyed Snake	Reptile	1	Waxing Crescent (43.3% Full)	Dark	Dry	7:30 - 10:30	11:02:00	23:18:00	3
November	2014	2014-11-29	Leptodeira septentrionalis	Northern Cat-eyed Snake	Reptile	1	First Quarter (54.6% Full)	Semi-bright	Dry	7:30 - 10:30	11:52:00	-	3
November	2014	2014-11-29	Mastigodryas melanolomus	Neotropical Racer	Reptile	1	First Quarter (54.6% Full)	Semi-bright	Dry	7:30 - 10:30	11:52:00	-	0
November	2014	2014-11-30	Imantodes cenchoa	Chunk-headed Snake	Reptile	1	Waxing Gibbous (65.8% Full)	Semi-bright	Dry	7:30 - 10:30	12:40:00	00:12:00	0
December	2014	2014-12-01	Imantodes cenchoa	Chunk-headed Snake	Reptile	3	Waxing Gibbous (76% Full)	Bright	Dry	7:30 - 10:30	13:28:00	01:06:00	3
December	2014	2014-12-06	Leptodeira septentrionalis	Northern Cat-eyed Snake	Reptile	1	Full Moon (99.9% Full)	Dark	Light Rain	5:30 - 7:50	17:40:00	05:37:00	2.5
December	2014	2014-12-07	Clelia clelia	Mussurana	Reptile	1	Waning Gibbous (98% Full)	Semi-Bright	Dry	8:00 - 10:20	18:32:00	06:30:00	2.5
December	2014	2014-12-08	Enuliophis sclateri	Sock-headed Snake	Reptile	1	Waning Gibbous (94.4% Full)	Semi-bright	Light Rain	7:00 - 9:45	19:23:00	07:21:00	2.75
December	2014	2014-12-08	Leptodeira septentrionalis	Northern Cat-eyed Snake	Reptile	1	Waning Gibbous (94.4% Full)	Semi-bright	Light Rain	7:00 - 9:45	19:23:00	07:21:00	0
December	2014	2014-12-10	Leptodeira septentrionalis	Northern Cat-eyed Snake	Reptile	1	Waning Gibbous (82% Full)	Dark	Dry	8:00 - 10:30	21:01:00	08:54:00	2.5
December	2014	2014-12-15	Imantodes cenchoa	Chunk-headed Snake	Reptile	1	Waning Crescent (37.6% Full)	Dark	Dry	7:30 - 10:30	00:02:00	12:20:00	3
December	2014	2014-12-17	Leptodeira septentrionalis	Northern Cat-eyed Snake	Reptile	2	Waning Crescent (19.8% Full)	Dark	Light Rain	7:30 - 10:45	01:36:00	13:46:00	3.25
December	2014	2014-12-18	Leptodeira septentrionalis	Northern Cat-eyed Snake	Reptile	1	Waning Crescent (12.3% Full)	Dark	Light Rain	7:30 - 10:20	02:26:00	14:33:00	3
December	2014	2014-12-20	Imantodes cenchoa	Chunk-headed Snake	Reptile	1	Waning Crescent (2.2% Full)	Dark	Dry	6:00 - 8:00	04:14:00	16:17:00	2
December	2014	2014-12-20	Leptodeira septentrionalis	Northern Cat-eyed Snake	Reptile	1	Waning Crescent (2.2% Full)	Dark	Dry	6:00 - 8:00	04:14:00	16:17:00	0
December	2014	2014-12-20	Imantodes cenchoa	Chunk-headed Snake	Reptile	1	Waning Crescent (1.9% Full)	Dark	Rainy	7:30 - 10:15	04:14:00	16:17:00	0
December	2014	2014-12-20	Leptodeira septentrionalis	Northern Cat-eyed Snake	Reptile	1	Waning Crescent (1.9% Full)	Dark	Rainy	7:30 - 10:15	04:14:00	16:17:00	2.75
December	2014	2014-12-21	Leptodeira septentrionalis	Northern Cat-eyed Snake	Reptile	1	New Moon (0.1% Full)	Dark	Light Rain	7:30 - 10:30	05:12:00	17:15:00	3
December	2014	2014-12-22	Leptodeira septentrionalis	Northern Cat-eyed Snake	Reptile	1	Waxing Crescent (0.6% Full)	Dark	Dry	5:30 - 8:00	06:10:00	18:14:00	2.5
December	2014	2014-12-25	Enuliophis sclateri	Sock-headed Snake	Reptile	1	Waxing Crescent (18.2% Full)	Dark	Dry	6:00 - 8:00	08:58:00	21:12:00	0
December	2014	2014-12-25	Imantodes cenchoa	Chunk-headed Snake	Reptile	1	Waxing Crescent (18.2% Full)	Dark	Dry	6:00 - 8:00	08:58:00	21:12:00	2
December	2014	2014-12-25	Leptodeira septentrionalis	Northern Cat-eyed Snake	Reptile	1	Waxing Crescent (18.2% Full)	Dark	Dry	6:00 - 8:00	08:58:00	21:12:00	0
December	2014	2014-12-25	Enuliophis sclateri	Sock-headed Snake	Reptile	1	Waxing Crescent (18.7% Full)	Dark	Dry	7:30 - 10:45	08:58:00	21:12:00	3.25
December	2014	2014-12-25	Siphlophis compressus	Red-eyed Tree Snake	Reptile	1	Waxing Crescent (18.7% Full)	Dark	Dry	7:30 - 10:45	08:58:00	21:12:00	0
December	2014	2014-12-26	Enuliophis sclateri	Sock-headed Snake	Reptile	1	Waxing Crescent (27.6% Full)	Dark	Dry	5:30 - 8:00	09:49:00	22:08:00	0
December	2014	2014-12-26	Imantodes cenchoa	Chunk-headed Snake	Reptile	1	Waxing Crescent (27.6% Full)	Dark	Dry	5:30 - 8:00	09:49:00	22:08:00	0
December	2014	2014-12-26	Leptodeira septentrionalis	Northern Cat-eyed Snake	Reptile	1	Waxing Crescent (27.6% Full)	Dark	Dry	5:30 - 8:00	09:49:00	22:08:00	0
December	2014	2014-12-26	Siphlophis compressus	Red-eyed Tree Snake	Reptile	1	Waxing Crescent (27.6% Full)	Dark	Dry	5:30 - 8:00	09:49:00	22:08:00	2.5
December	2014	2014-12-27	Imantodes cenchoa	Chunk-headed Snake	Reptile	1	Waxing Crescent (38.7% Full)	Dark	Dry	6:00 - 8:00	10:38:00	23:03:00	2
December	2014	2014-12-27	Leptodeira septentrionalis	Northern Cat-eyed Snake	Reptile	1	Waxing Crescent (39.5% Full)	Dark	Dry	7:30 - 10:30	10:38:00	23:03:00	3
December	2014	2014-12-29	Coniophanes fissidens	Brown Spotbelly	Reptile	1	Waxing Gibbous (61.7% Full)	Dark	Dry	7:30 - 10:30	12:15:00	-	3
December	2014	2014-12-29	Leptodeira septentrionalis	Northern Cat-eyed Snake	Reptile	1	Waxing Gibbous (61.7% Full)	Dark	Dry	7:30 - 10:30	12:15:00	-	0
December	2014	2014-12-29	Leptodeira septentrionalis	Northern Cat-eyed Snake	Reptile	1	Waxing Gibbous (61.7% Full)	Dark	Dry	7:30 - 10:30	12:15:00	-	0
December	2014	2014-12-30	Imantodes cenchoa	Chunk-headed Snake	Reptile	1	Waxing Gibbous (72.2% Full)	Dark	Dry	7:30 - 10:30	13:03:00	00:50:00	0
December	2014	2014-12-30	Leptodeira septentrionalis	Northern Cat-eyed Snake	Reptile	1	Waxing Gibbous (72.2% Full)	Dark	Dry	7:30 - 10:30	13:03:00	00:50:00	3
January	2015	2015-01-01	Clelia clelia	Mussurana	Reptile	1	Waxing Gibbous (88.2% Full)	Bright	Dry	5:30 - 7:55	14:42:00	02:37:00	2.5
January	2015	2015-01-02	Imantodes cenchoa	Chunk-headed Snake	Reptile	1	Waxing Gibbous (94% Full)	Bright	Dry	5:30 - 7:55	15:33:00	03:30:00	2.5
January	2015	2015-01-02	Imantodes cenchoa	Chunk-headed Snake	Reptile	1	Waxing Gibbous (94.5% Full)	Bright	Dry	7:30 - 10:30	15:33:00	03:30:00	0
January	2015	2015-01-02	Leptodeira septentrionalis	Northern Cat-eyed Snake	Reptile	1	Waxing Gibbous (94.5% Full)	Bright	Dry	7:30 - 10:30	15:33:00	03:30:00	3
January	2015	2015-01-05	Imantodes cenchoa	Chunk-headed Snake	Reptile	1	Waning Gibbous (99.6% Full)	Bright	Dry	7:30 - 10:30	18:05:00	06:02:00	3
January	2015	2015-01-05	Leptodeira septentrionalis	Northern Cat-eyed Snake	Reptile	1	Waning Gibbous (99.6% Full)	Bright	Dry	7:30 - 10:30	18:05:00	06:02:00	0
January	2015	2015-01-06	Imantodes cenchoa	Chunk-headed Snake	Reptile	1	Waning Gibbous (97.7% Full)	Dark	Dry	5:30 - 7:55	18:54:00	06:49:00	2.5
January	2015	2015-01-06	Leptodeira septentrionalis	Northern Cat-eyed Snake	Reptile	1	Waning Gibbous (97.3% Full)	Bright	Dry	8:00 - 10:00	18:54:00	06:49:00	2
January	2015	2015-01-07	Imantodes cenchoa	Chunk-headed Snake	Reptile	1	Waning Gibbous (93.8% Full)	Dark	Dry	5:30 - 7:55	19:41:00	07:33:00	2.5
January	2015	2015-01-08	Imantodes cenchoa	Chunk-headed Snake	Reptile	1	Waning Gibbous (88.1% Full)	Dark	Dry	7:30 - 10:30	20:27:00	08:15:00	3
January	2015	2015-01-08	Leptodeira septentrionalis	Northern Cat-eyed Snake	Reptile	2	Waning Gibbous (88.1% Full)	Dark	Dry	7:30 - 10:30	20:27:00	08:15:00	0
January	2015	2015-01-09	Imantodes cenchoa	Chunk-headed Snake	Reptile	1	Waning Gibbous (81.2% Full)	Dark	Dry	7:30 - 10:40	21:11:00	08:56:00	3
January	2015	2015-01-10	Leptodeira septentrionalis	Northern Cat-eyed Snake	Reptile	3	Waning Gibbous (73.3% Full)	Dark	Dry	7:30 - 10:30	21:56:00	09:36:00	3
January	2015	2015-01-11	Leptodeira septentrionalis	Northern Cat-eyed Snake	Reptile	1	Waning Gibbous (64.6% Full)	Dark	Dry	7:30 - 10:30	22:41:00	10:18:00	3
January	2015	2015-01-11	Leptodeira septentrionalis	Northern Cat-eyed Snake	Reptile	1	Waning Gibbous (64.6% Full)	Dark	Dry	7:30 - 10:30	22:41:00	10:18:00	0
January	2015	2015-01-11	Ninia maculata	Banded Coffee Snake	Reptile	1	Waning Gibbous (64.6% Full)	Dark	Dry	7:30 - 10:30	22:41:00	10:18:00	0
January	2015	2015-01-13	Enuliophis sclateri	Sock-headed Snake	Reptile	1	Last Quarter (45.7% Full)	Dark	Dry	7:30 - 10:30	-	11:38:00	3
January	2015	2015-01-13	Imantodes cenchoa	Chunk-headed Snake	Reptile	1	Last Quarter (45.7% Full)	Dark	Dry	7:30 - 10:30	-	11:38:00	0
January	2015	2015-01-15	Leptodeira septentrionalis	Northern Cat-eyed Snake	Reptile	1	Waning Crescent (26.4% Full)	Dark	Light Rain	7:30 - 10:30	01:05:00	13:10:00	3
January	2015	2015-01-17	Leptodeira septentrionalis	Northern Cat-eyed Snake	Reptile	1	Waning Crescent (10% Full)	Dark	Light Rain	7:30 - 10:45	02:54:00	14:57:00	3.25
January	2015	2015-01-23	Enuliophis sclateri	Sock-headed Snake	Reptile	1	Waxing Crescent (14.4% Full)	Dark	Dry	5:30 - 8:00	08:32:00	20:54:00	2.5
January	2015	2015-01-23	Enuliophis sclateri	Sock-headed Snake	Reptile	1	Waxing Crescent (15.1% Full)	Dark	Dry	7:30 - 10:30	08:32:00	20:54:00	0
January	2015	2015-01-23	Leptodeira septentrionalis	Northern Cat-eyed Snake	Reptile	1	Waxing Crescent (15.1% Full)	Dark	Dry	7:30 - 10:30	08:32:00	20:54:00	3
January	2015	2015-01-24	Imantodes cenchoa	Chunk-headed Snake	Reptile	1	Waxing Crescent (24.6% Full)	Dark	Dry	7:30 - 10:30	09:22:00	21:50:00	3
January	2015	2015-01-25	Leptodeira septentrionalis	Northern Cat-eyed Snake	Reptile	1	Waxing Crescent (35% Full)	Dark	Dry	7:30 - 10:15	10:11:00	22:45:00	2.75
January	2015	2015-01-26	Imantodes cenchoa	Chunk-headed Snake	Reptile	1	First Quarter (46% Full)	Dark	Dry	7:30 - 10:15	11:01:00	23:39:00	2.75
January	2015	2015-01-28	Leptodeira septentrionalis	Northern Cat-eyed Snake	Reptile	1	Waxing Gibbous (66.3% Full)	Dark	Light Rain	5:30 - 8:00	12:40:00	00:33:00	2.5
January	2015	2015-01-28	Imantodes cenchoa	Chunk-headed Snake	Reptile	1	Waxing Gibbous (67.4% Full)	Dark	Dry	7:30 - 10:30	12:40:00	00:33:00	3
January	2015	2015-01-29	Imantodes cenchoa	Chunk-headed Snake	Reptile	1	Waxing Gibbous (76.5% Full)	Bright	Dry	7:30 - 10:30	13:30:00	01:26:00	3
January	2015	2015-01-29	Phrynonax poecilonotus	Neotropical Birdsnake	Reptile	1	Waxing Gibbous (76.5% Full)	Bright	Dry	7:30 - 10:30	13:30:00	01:26:00	0
January	2015	2015-01-30	Mastigodryas melanolomus	Neotropical Racer	Reptile	1	Waxing Gibbous (83.9% Full)	Semi-bright	Dry	5:30 - 8:00	14:21:00	02:19:00	2.5
January	2015	2015-01-30	Imantodes cenchoa	Chunk-headed Snake	Reptile	1	Waxing Gibbous (84.6% Full)	Semi-bright	Dry	7:30 - 10:15	14:21:00	02:19:00	2.75
January	2015	2015-01-30	Mastigodryas melanolomus	Neotropical Racer	Reptile	1	Waxing Gibbous (84.6% Full)	Semi-bright	Dry	7:30 - 10:15	14:21:00	02:19:00	0
January	2015	2015-01-31	Leptodeira septentrionalis	Northern Cat-eyed Snake	Reptile	1	Waxing Gibbous (91% Full)	Bright	Dry	7:30 - 10:45	15:11:00	03:09:00	3.25
February	2015	2015-02-06	Clelia clelia	Mussurana	Reptile	1	Waning Gibbous (92.6% Full)	Dark	Light Rain	8:00 - 10:15	19:53:00	07:34:00	2.25
February	2015	2015-02-06	Leptodeira septentrionalis	Northern Cat-eyed Snake	Reptile	1	Waning Gibbous (92.6% Full)	Dark	Light Rain	8:00 - 10:15	19:53:00	07:34:00	0
February	2015	2015-02-09	Leptodeira septentrionalis	Northern Cat-eyed Snake	Reptile	2	Waning Gibbous (71.9% Full)	Dark	Light Rain	7:30 - 10:15	22:09:00	09:35:00	2.75
February	2015	2015-02-17	Imantodes cenchoa	Chunk-headed Snake	Reptile	1	Waning Crescent (2.3% Full)	Dark	Dry	5:30 - 8:00	03:30:00	15:36:00	2.5
February	2015	2015-02-17	Enuliophis sclateri	Sock-headed Snake	Reptile	1	Waning Crescent (2% Full)	Dark	Dry	7:30 - 10:20	03:30:00	15:36:00	3
February	2015	2015-02-17	Leptodeira septentrionalis	Northern Cat-eyed Snake	Reptile	1	Waning Crescent (2% Full)	Dark	Dry	7:30 - 10:20	03:30:00	15:36:00	0
February	2015	2015-02-18	Leptodeira septentrionalis	Northern Cat-eyed Snake	Reptile	1	New Moon (0.1% Full)	Dark	Dry	5:30 - 8:00	05:23:00	17:38:00	2.5
February	2015	2015-02-18	Micrurus alleni	Allen's Coral Snake	Reptile	1	New Moon (0.1% Full)	Dark	Dry	5:30 - 8:00	05:23:00	17:38:00	0
February	2015	2015-02-18	Leptodeira septentrionalis	Northern Cat-eyed Snake	Reptile	1	New Moon (0% Full)	Dark	Dry	7:30 - 10:15	05:23:00	17:38:00	2.75
February	2015	2015-02-19	Leptodeira septentrionalis	Northern Cat-eyed Snake	Reptile	1	Waxing Crescent (0.9% Full)	Dark	Dry	6:00 - 8:00	06:17:00	18:38:00	2
February	2015	2015-02-19	Bothriechis schlegelii	Eyelash Viper	Reptile	1	Waxing Crescent (1.1% Full)	Dark	Dry	7:30 - 10:15	06:17:00	18:38:00	2.75
February	2015	2015-02-19	Imantodes cenchoa	Chunk-headed Snake	Reptile	1	Waxing Crescent (1.1% Full)	Dark	Dry	7:30 - 10:15	06:17:00	18:38:00	0
February	2015	2015-02-19	Leptodeira septentrionalis	Northern Cat-eyed Snake	Reptile	1	Waxing Crescent (1.1% Full)	Dark	Dry	7:30 - 10:15	06:17:00	18:38:00	0
February	2015	2015-02-20	Boa imperator	Boa Constrictor	Reptile	1	Waxing Crescent (5.2% Full)	Dark	Dry	7:30 - 10:15	07:10:00	19:36:00	2.75
February	2015	2015-02-21	Boa imperator	Boa Constrictor	Reptile	1	Waxing Crescent (11.7% Full)	Dark	Dry	7:30 - 10:30	08:01:00	20:34:00	0
February	2015	2015-02-21	Leptodeira septentrionalis	Northern Cat-eyed Snake	Reptile	1	Waxing Crescent (11.7% Full)	Dark	Dry	7:30 - 10:30	08:01:00	20:34:00	3
February	2015	2015-02-21	Leptodeira septentrionalis	Northern Cat-eyed Snake	Reptile	1	Waxing Crescent (11.7% Full)	Dark	Dry	7:30 - 10:30	08:01:00	20:34:00	0
February	2015	2015-02-22	Leptodeira septentrionalis	Northern Cat-eyed Snake	Reptile	1	Waxing Crescent (19.5% Full)	Dark	Dry	5:30 - 8:00	08:53:00	21:30:00	2.5
February	2015	2015-02-22	Imantodes cenchoa	Chunk-headed Snake	Reptile	1	Waxing Crescent (20.5% Full)	Dark	Dry	7:30 - 10:30	08:53:00	21:30:00	0
February	2015	2015-02-22	Leptodeira septentrionalis	Northern Cat-eyed Snake	Reptile	1	Waxing Crescent (20.5% Full)	Dark	Dry	7:30 - 10:30	08:53:00	21:30:00	3
February	2015	2015-02-23	Leptodeira septentrionalis	Northern Cat-eyed Snake	Reptile	2	Waxing Crescent (28.3% Full)	Dark	Dry	5:30 - 8:00	09:44:00	22:26:00	2.5
February	2015	2015-02-23	Imantodes cenchoa	Chunk-headed Snake	Reptile	1	Waxing Crescent (30.6% Full)	Dark	Dry	8:00 - 10:15	09:44:00	22:26:00	2.25
February	2015	2015-02-25	Imantodes cenchoa	Chunk-headed Snake	Reptile	1	First Quarter (50.4% Full)	Dark	Dry	5:30 - 8:00	11:26:00	-	2.5
February	2015	2015-02-25	Siphlophis compressus	Red-eyed Tree Snake	Reptile	1	First Quarter (50.4% Full)	Dark	Dry	5:30 - 8:00	11:26:00	-	0
February	2015	2015-02-25	Leptodeira septentrionalis	Northern Cat-eyed Snake	Reptile	1	First Quarter (51.3% Full)	Dark	Dry	7:30 - 10:15	11:26:00	-	2.75
February	2015	2015-02-26	Leptodeira septentrionalis	Northern Cat-eyed Snake	Reptile	1	Waxing Gibbous (61.5% Full)	Semi-bright	Dry	7:30 - 10:30	12:17:00	00:14:00	3
February	2015	2015-02-26	Siphlophis compressus	Red-eyed Tree Snake	Reptile	1	Waxing Gibbous (61.5% Full)	Semi-bright	Dry	7:30 - 10:30	12:17:00	00:14:00	0
February	2015	2015-02-27	Micrurus alleni	Allen's Coral Snake	Reptile	1	Waxing Gibbous (70.2% Full)	Semi-bright	Dry	5:30 - 8:00	13:08:00	01:06:00	2.5
March	2015	2015-03-01	Leptodeira septentrionalis	Northern Cat-eyed Snake	Reptile	1	Waxing Gibbous (86.7% Full)	Bright	Dry	7:30 - 10:30	14:47:00	02:43:00	3
March	2015	2015-03-01	Leptodeira septentrionalis	Northern Cat-eyed Snake	Reptile	1	Waxing Gibbous (86.7% Full)	Bright	Dry	7:30 - 10:30	14:47:00	02:43:00	0
March	2015	2015-03-03	Phrynonax poecilonotus	Neotropical Birdsnake	Reptile	1	Waxing Gibbous (96.4% Full)	Bright	Dry	5:30 - 8:00	16:20:00	04:12:00	2.5
March	2015	2015-03-04	Leptodeira septentrionalis	Northern Cat-eyed Snake	Reptile	1	Waxing Gibbous (99.2% Full)	Bright	Dry	7:30 - 10:15	17:06:00	04:53:00	2.75
March	2015	2015-03-05	Imantodes cenchoa	Chunk-headed Snake	Reptile	1	Full Moon (100% Full)	Bright	Dry	8:00 - 10:20	17:51:00	05:34:00	2.25
March	2015	2015-03-06	Imantodes cenchoa	Chunk-headed Snake	Reptile	1	Waning Gibbous (99.1% Full)	Dark	Dry	5:30 - 8:00	18:36:00	06:14:00	2.5
March	2015	2015-03-06	Leptodeira septentrionalis	Northern Cat-eyed Snake	Reptile	1	Waning Gibbous (99.1% Full)	Dark	Dry	5:30 - 8:00	18:36:00	06:14:00	0
March	2015	2015-03-06	Imantodes cenchoa	Chunk-headed Snake	Reptile	1	Waning Gibbous (98.9% Full)	Bright	Dry	7:30 - 10:30	18:36:00	06:14:00	0
March	2015	2015-03-06	Leptodeira septentrionalis	Northern Cat-eyed Snake	Reptile	1	Waning Gibbous (98.9% Full)	Bright	Dry	7:30 - 10:30	18:36:00	06:14:00	3
March	2015	2015-03-06	Leptodeira septentrionalis	Northern Cat-eyed Snake	Reptile	1	Waning Gibbous (98.9% Full)	Bright	Dry	7:30 - 10:30	18:36:00	06:14:00	0
March	2015	2015-03-07	Imantodes cenchoa	Chunk-headed Snake	Reptile	1	Waning Gibbous (96.4% Full)	Dark	Dry	5:30 - 8:00	19:21:00	06:54:00	2.5
March	2015	2015-03-08	Imantodes cenchoa	Chunk-headed Snake	Reptile	1	Waning Gibbous (91.7% Full)	Dark	Dry	7:30 - 10:00	20:06:00	07:34:00	2.5
March	2015	2015-03-08	Leptodeira septentrionalis	Northern Cat-eyed Snake	Reptile	1	Waning Gibbous (91.7% Full)	Dark	Dry	7:30 - 10:00	20:06:00	07:34:00	0
March	2015	2015-03-10	Leptodeira septentrionalis	Northern Cat-eyed Snake	Reptile	1	Waning Gibbous (78% Full)	Dark	Dry	7:30 - 10:30	21:42:00	09:00:00	3
March	2015	2015-03-11	Leptodeira septentrionalis	Northern Cat-eyed Snake	Reptile	1	Waning Gibbous (69% Full)	Dark	Dry	7:30 - 10:30	22:33:00	09:46:00	3
March	2015	2015-03-12	Leptodeira septentrionalis	Northern Cat-eyed Snake	Reptile	3	Waning Gibbous (59.3% Full)	Dark	Dry	7:30 - 10:30	23:26:00	10:35:00	3
March	2015	2015-03-13	Imantodes cenchoa	Chunk-headed Snake	Reptile	1	Last Quarter (49.8% Full)	Dark	Dry	7:30 - 10:30	-	11:27:00	0
March	2015	2015-03-13	Siphlophis compressus	Red-eyed Tree Snake	Reptile	1	Last Quarter (49.8% Full)	Dark	Dry	7:30 - 10:30	-	11:27:00	3
March	2015	2015-03-14	Leptodeira septentrionalis	Northern Cat-eyed Snake	Reptile	1	Waning Crescent (37.6% Full)	Dark	Dry	7:30 - 10:15	00:20:00	12:22:00	2.75
March	2015	2015-03-16	Leptodeira septentrionalis	Northern Cat-eyed Snake	Reptile	2	Waning Crescent (17.9% Full)	Dark	Dry	7:30 - 10:15	02:11:00	14:18:00	2.75
March	2015	2015-03-17	Leptodeira septentrionalis	Northern Cat-eyed Snake	Reptile	1	Waning Crescent (10.2% Full)	Dark	Dry	6:00 - 8:00	03:06:00	15:18:00	2
March	2015	2015-03-18	Boa imperator	Boa Constrictor	Reptile	1	Waning Crescent (3.9% Full)	Dark	Dry	6:00 - 8:00	04:00:00	16:17:00	2
March	2015	2015-03-18	Siphlophis compressus	Red-eyed Tree Snake	Reptile	1	Waning Crescent (3.9% Full)	Dark	Dry	6:00 - 8:00	04:00:00	16:17:00	0
March	2015	2015-03-18	Siphlophis compressus	Red-eyed Tree Snake	Reptile	1	Waning Crescent (3.6% Full)	Dark	Dry	7:30 - 10:15	04:00:00	16:17:00	0
March	2015	2015-03-20	Imantodes cenchoa	Chunk-headed Snake	Reptile	1	New Moon (0.2% Full)	Dark	Dry	7:30 - 10:30	05:46:00	18:15:00	3
March	2015	2015-03-21	Clelia clelia	Mussurana	Reptile	1	Waxing Crescent (3.2% Full)	Dark	Dry	8:00 - 10:30	06:38:00	19:13:00	2.5
March	2015	2015-03-21	Leptodeira septentrionalis	Northern Cat-eyed Snake	Reptile	1	Waxing Crescent (3.2% Full)	Dark	Dry	8:00 - 10:30	06:38:00	19:13:00	0
March	2015	2015-03-21	Mastigodryas melanolomus	Neotropical Racer	Reptile	1	Waxing Crescent (3.2% Full)	Dark	Dry	8:00 - 10:30	06:38:00	19:13:00	0
March	2015	2015-03-22	Imantodes cenchoa	Chunk-headed Snake	Reptile	1	Waxing Crescent (8.6% Full)	Dark	Dry	7:30 - 10:15	07:31:00	20:11:00	2.75
March	2015	2015-03-22	Leptodeira septentrionalis	Northern Cat-eyed Snake	Reptile	1	Waxing Crescent (8.6% Full)	Dark	Dry	7:30 - 10:15	07:31:00	20:11:00	0
March	2015	2015-03-22	Leptodeira septentrionalis	Northern Cat-eyed Snake	Reptile	1	Waxing Crescent (8.6% Full)	Dark	Dry	7:30 - 10:15	07:31:00	20:11:00	0
March	2015	2015-03-24	Imantodes cenchoa	Chunk-headed Snake	Reptile	1	Waxing Crescent (24.5% Full)	Dark	Dry	5:30 - 8:00	09:17:00	22:05:00	2.5
March	2015	2015-03-26	Imantodes cenchoa	Chunk-headed Snake	Reptile	1	Waxing Crescent (45% Full)	Dark	Dry	7:30 - 10:30	11:02:00	23:50:00	3
March	2015	2015-03-28	Leptodeira septentrionalis	Northern Cat-eyed Snake	Reptile	1	Waxing Gibbous (65% Full)	Dark	Dry	7:30 - 10:40	12:43:00	00:39:00	3.25
March	2015	2015-03-29	Leptodeira septentrionalis	Northern Cat-eyed Snake	Reptile	1	Waxing Gibbous (73.9% Full)	Dark	Dry	8:00 - 10:30	13:31:00	01:26:00	2.5
March	2015	2015-03-30	Leptodeira septentrionalis	Northern Cat-eyed Snake	Reptile	1	Waxing Gibbous (81.6% Full)	Bright	Dry	7:30 - 10:30	14:18:00	02:10:00	3
March	2015	2015-03-31	Leptodeira septentrionalis	Northern Cat-eyed Snake	Reptile	1	Waxing Gibbous (88.3% Full)	Bright	Dry	7:30 - 10:40	15:03:00	02:52:00	3
April	2015	2015-04-01	Leptodeira septentrionalis	Northern Cat-eyed Snake	Reptile	1	Waxing Gibbous (93.7% Full)	Bright	Dry	7:30 - 10:30	15:48:00	03:33:00	2
April	2015	2015-04-03	Imantodes cenchoa	Chunk-headed Snake	Reptile	1	Waxing Gibbous (99.5% Full)	Bright	Dry	6:30 - 8:45	17:18:00	04:53:00	0
April	2015	2015-04-03	Leptodeira septentrionalis	Northern Cat-eyed Snake	Reptile	1	Waxing Gibbous (99.5% Full)	Bright	Dry	6:30 - 8:45	17:18:00	04:53:00	2.25
April	2015	2015-04-04	Imantodes cenchoa	Chunk-headed Snake	Reptile	1	Full Moon (99.9% Full)	Bright	Dry	7:30 - 10:40	18:04:00	05:35:00	3
April	2015	2015-04-05	Leptodeira septentrionalis	Northern Cat-eyed Snake	Reptile	1	Waning Gibbous (98.5% Full)	Dark	Dry	5:45 - 8:00	18:51:00	06:15:00	2.25
April	2015	2015-04-07	Leptodeira septentrionalis	Northern Cat-eyed Snake	Reptile	1	Waning Gibbous (89.5% Full)	Dark	Dry	7:30 - 10:30	20:30:00	07:44:00	3
April	2015	2015-04-08	Leptodeira septentrionalis	Northern Cat-eyed Snake	Reptile	1	Waning Gibbous (82.5% Full)	Dark	Dry	7:30 - 10:30	21:22:00	08:33:00	3
April	2015	2015-04-09	Siphlophis compressus	Red-eyed Tree Snake	Reptile	1	Waning Gibbous (74% Full)	Dark	Dry	7:30 - 10:30	22:14:00	09:23:00	3
April	2015	2015-04-10	Enuliophis sclateri	Sock-headed Snake	Reptile	1	Waning Gibbous (64.7% Full)	Dark	Dry	6:00 - 8:00	23:08:00	10:16:00	2
April	2015	2015-04-11	Leptodeira septentrionalis	Northern Cat-eyed Snake	Reptile	1	Last Quarter (53.5% Full)	Dark	Light Rain	7:30 - 10:30	-	11:11:00	3
April	2015	2015-04-12	Imantodes cenchoa	Chunk-headed Snake	Reptile	1	Waning Crescent (42.5% Full)	Dark	Dry	7:30 - 10:30	00:02:00	12:08:00	3
April	2015	2015-04-13	Enuliophis sclateri	Sock-headed Snake	Reptile	1	Waning Crescent (31.4% Full)	Dark	Dry	7:30 - 10:15	00:55:00	13:05:00	2.75
April	2015	2015-04-13	Leptodeira septentrionalis	Northern Cat-eyed Snake	Reptile	1	Waning Crescent (31.4% Full)	Dark	Dry	7:30 - 10:15	00:55:00	13:05:00	0
April	2015	2015-04-13	Mastigodryas melanolomus	Neotropical Racer	Reptile	1	Waning Crescent (31.4% Full)	Dark	Dry	7:30 - 10:15	00:55:00	13:05:00	0
April	2015	2015-04-14	Leptodeira septentrionalis	Northern Cat-eyed Snake	Reptile	1	Waning Crescent (20.8% Full)	Dark	Dry	8:00 - 10:00	01:48:00	14:02:00	2
April	2015	2015-04-14	Mastigodryas melanolomus	Neotropical Racer	Reptile	1	Waning Crescent (20.8% Full)	Dark	Dry	8:00 - 10:00	01:48:00	14:02:00	0
April	2015	2015-04-17	Chironius flavopictus	Keeled Whip Snake	Reptile	1	Waning Crescent (1.2% Full)	Dark	Dry	7:30 - 10:45	04:23:00	16:55:00	3.25
April	2015	2015-04-17	Enuliophis sclateri	Sock-headed Snake	Reptile	1	Waning Crescent (1.2% Full)	Dark	Dry	7:30 - 10:45	04:23:00	16:55:00	0
April	2015	2015-04-17	Leptodeira septentrionalis	Northern Cat-eyed Snake	Reptile	1	Waning Crescent (1.2% Full)	Dark	Dry	7:30 - 10:45	04:23:00	16:55:00	0
April	2015	2015-04-17	Mastigodryas melanolomus	Neotropical Racer	Reptile	1	Waning Crescent (1.2% Full)	Dark	Dry	7:30 - 10:45	04:23:00	16:55:00	0
April	2015	2015-04-17	Siphlophis compressus	Red-eyed Tree Snake	Reptile	1	Waning Crescent (1.2% Full)	Dark	Dry	7:30 - 10:45	04:23:00	16:55:00	0
April	2015	2015-04-18	Leptophis ahaetulla	Giant Parrot Snake	Reptile	1	New Moon (0% Full)	Dark	Dry	7:30 - 10:30	05:15:00	17:53:00	3
April	2015	2015-04-19	Boa imperator	Boa Constrictor	Reptile	1	Waxing Crescent (1.6% Full)	Dark	Dry	7:30 - 10:30	06:08:00	18:52:00	0
April	2015	2015-04-19	Imantodes cenchoa	Chunk-headed Snake	Reptile	1	Waxing Crescent (1.6% Full)	Dark	Dry	7:30 - 10:30	06:08:00	18:52:00	0
April	2015	2015-04-19	Leptodeira septentrionalis	Northern Cat-eyed Snake	Reptile	1	Waxing Crescent (1.6% Full)	Dark	Dry	7:30 - 10:30	06:08:00	18:52:00	3
April	2015	2015-04-22	Leptophis nebulosus	Yellow-lipped Parrot Snake	Reptile	1	Waxing Crescent (20% Full)	Dark	Dry	7:30 - 10:30	08:51:00	21:41:00	3
April	2015	2015-04-27	Imantodes cenchoa	Chunk-headed Snake	Reptile	2	Waxing Gibbous (67.1% Full)	Dark	Dry	7:30 - 10:30	12:59:00	00:49:00	0
April	2015	2015-04-27	Leptodeira septentrionalis	Northern Cat-eyed Snake	Reptile	1	Waxing Gibbous (67.1% Full)	Dark	Dry	7:30 - 10:30	12:59:00	00:49:00	3
April	2015	2015-04-30	Leptodeira septentrionalis	Northern Cat-eyed Snake	Reptile	1	Waxing Gibbous (89.9% Full)	Semi-bright	Dry	7:30 - 10:30	15:14:00	02:51:00	3
May	2015	2015-05-01	Leptodeira septentrionalis	Northern Cat-eyed Snake	Reptile	1	Waxing Gibbous (94.6% Full)	Dark	Dry	6:00 - 8:00	16:00:00	03:31:00	2
May	2015	2015-05-01	Enuliophis sclateri	Sock-headed Snake	Reptile	1	Waxing Gibbous (95% Full)	Bright	Dry	7:30 - 10:30	16:00:00	03:31:00	3
May	2015	2015-05-04	Imantodes cenchoa	Chunk-headed Snake	Reptile	1	Waning Gibbous (99.5% Full)	Semi-bright	Dry	7:30 - 10:30	18:26:00	05:41:00	0
May	2015	2015-05-04	Leptodeira septentrionalis	Northern Cat-eyed Snake	Reptile	3	Waning Gibbous (99.5% Full)	Semi-bright	Dry	7:30 - 10:30	18:26:00	05:41:00	3
May	2015	2015-05-04	Leptodeira septentrionalis	Northern Cat-eyed Snake	Reptile	1	Waning Gibbous (99.5% Full)	Semi-bright	Dry	7:30 - 10:30	18:26:00	05:41:00	0
May	2015	2015-05-11	Leptodeira septentrionalis	Northern Cat-eyed Snake	Reptile	2	Last Quarter (45.5% Full)	Dark	Dry	7:30 - 10:30	-	11:54:00	3
May	2015	2015-05-12	Imantodes cenchoa	Chunk-headed Snake	Reptile	1	Waning Crescent (34.3% Full)	Dark	Dry	7:30 - 10:10	00:33:00	12:50:00	2.25
May	2015	2015-05-12	Leptodeira septentrionalis	Northern Cat-eyed Snake	Reptile	2	Waning Crescent (34.3% Full)	Dark	Dry	7:30 - 10:10	00:33:00	12:50:00	0
May	2015	2015-05-13	Dendrophidion percarinatum	Barred Forest Racer	Reptile	1	Waning Crescent (23.8% Full)	Dark	Dry	7:30 - 10:20	01:23:00	13:46:00	3
May	2015	2015-05-13	Leptophis ahaetulla	Giant Parrot Snake	Reptile	1	Waning Crescent (23.8% Full)	Dark	Dry	7:30 - 10:20	01:23:00	13:46:00	0
May	2015	2015-05-17	Leptodeira septentrionalis	Northern Cat-eyed Snake	Reptile	1	New Moon (0.1% Full)	Dark	Dry	7:30 - 10:15	04:48:00	17:33:00	2.75
May	2015	2015-05-21	Imantodes cenchoa	Chunk-headed Snake	Reptile	1	Waxing Crescent (15.4% Full)	Dark	Dry	7:30 - 10:20	08:25:00	21:12:00	0
May	2015	2015-05-21	Leptodeira septentrionalis	Northern Cat-eyed Snake	Reptile	3	Waxing Crescent (15.4% Full)	Dark	Dry	7:30 - 10:20	08:25:00	21:12:00	2.75
May	2015	2015-05-21	Oxyrhopus petolarius	Banded Calico Snake	Reptile	1	Waxing Crescent (15.4% Full)	Dark	Dry	7:30 - 10:20	08:25:00	21:12:00	0
May	2015	2015-05-27	Imantodes cenchoa	Chunk-headed Snake	Reptile	2	Waxing Gibbous (69.5% Full)	Semi-bright	Dry	7:30 - 10:05	13:09:00	00:48:00	2.5
May	2015	2015-05-27	Leptodeira septentrionalis	Northern Cat-eyed Snake	Reptile	2	Waxing Gibbous (69.5% Full)	Semi-bright	Dry	7:30 - 10:05	13:09:00	00:48:00	0
May	2015	2015-05-28	Enuliophis sclateri	Sock-headed Snake	Reptile	1	Waxing Gibbous (78% Full)	Bright	Dry	7:30 - 10:10	13:54:00	01:28:00	2.25
May	2015	2015-05-28	Imantodes cenchoa	Chunk-headed Snake	Reptile	1	Waxing Gibbous (78% Full)	Bright	Dry	7:30 - 10:10	13:54:00	01:28:00	0
May	2015	2015-05-28	Leptodeira septentrionalis	Northern Cat-eyed Snake	Reptile	1	Waxing Gibbous (78% Full)	Bright	Dry	7:30 - 10:10	13:54:00	01:28:00	0
June	2015	2015-06-01	Enuliophis sclateri	Sock-headed Snake	Reptile	1	Waxing Gibbous (99.3% Full)	Bright	Light Rain	7:45 - 10:00	17:10:00	04:22:00	0
June	2015	2015-06-01	Leptodeira septentrionalis	Northern Cat-eyed Snake	Reptile	1	Waxing Gibbous (99.3% Full)	Bright	Light Rain	7:45 - 10:00	17:10:00	04:22:00	2.25
June	2015	2015-06-02	Imantodes cenchoa	Chunk-headed Snake	Reptile	1	Full Moon (100% Full)	Semi-bright	Dry	7:30 - 10:15	18:04:00	05:13:00	2.25
June	2015	2015-06-04	Leptodeira septentrionalis	Northern Cat-eyed Snake	Reptile	1	Waning Gibbous (94.4% Full)	Dark	Light Rain	8:00 - 10:00	19:53:00	07:01:00	2
June	2015	2015-06-06	Imantodes cenchoa	Chunk-headed Snake	Reptile	1	Waning Gibbous (80.1% Full)	Dark	Dry	7:30 - 10:30	21:40:00	08:54:00	3
June	2015	2015-06-12	Imantodes cenchoa	Chunk-headed Snake	Reptile	1	Waning Crescent (16.5% Full)	Dark	Dry	7:50 - 10:25	01:48:00	14:26:00	2.25
June	2015	2015-06-12	Leptodeira septentrionalis	Northern Cat-eyed Snake	Reptile	1	Waning Crescent (16.5% Full)	Dark	Dry	7:50 - 10:25	01:48:00	14:26:00	0
June	2015	2015-06-21	Leptodeira septentrionalis	Northern Cat-eyed Snake	Reptile	1	Waxing Crescent (26.3% Full)	Dark	Dry	8:00 - 10:00	09:33:00	22:04:00	2
June	2015	2015-06-24	Leptodeira septentrionalis	Northern Cat-eyed Snake	Reptile	1	First Quarter (53.6% Full)	Dark	Dry	7:30 - 10:25	11:48:00	-	3
June	2015	2015-06-25	Leptodeira septentrionalis	Northern Cat-eyed Snake	Reptile	1	Waxing Gibbous (62.7% Full)	Semi-bright	Dry	6:15 - 8:45	12:33:00	00:05:00	2.5
June	2015	2015-06-26	Boa imperator	Boa Constrictor	Reptile	1	Waxing Gibbous (72.2% Full)	Semi-bright	Dry	7:30 - 10:30	13:20:00	00:46:00	3
July	2015	2015-07-08	Leptodeira septentrionalis	Northern Cat-eyed Snake	Reptile	1	Last Quarter (50.1% Full)	Dark	Dry	7:30 - 10:30	23:46:00	11:27:00	3
July	2015	2015-07-10	Siphlophis compressus	Red-eyed Tree Snake	Reptile	1	Waning Crescent (28.2% Full)	Dark	Light Rain	7:30 - 10:15	00:36:00	13:16:00	2.75
July	2015	2015-07-12	Imantodes cenchoa	Chunk-headed Snake	Reptile	1	Waning Crescent (11.1% Full)	Dark	Light Rain	7:30 - 10:30	02:18:00	15:07:00	3
July	2015	2015-07-13	Imantodes cenchoa	Chunk-headed Snake	Reptile	1	Waning Crescent (5.6% Full)	Dark	Dry	6:00 - 8:00	03:11:00	16:01:00	2
July	2015	2015-07-13	Leptodeira septentrionalis	Northern Cat-eyed Snake	Reptile	1	Waning Crescent (5.6% Full)	Dark	Dry	6:00 - 8:00	03:11:00	16:01:00	0
July	2015	2015-07-13	Imantodes cenchoa	Chunk-headed Snake	Reptile	1	Waning Crescent (5.1% Full)	Dark	Dry	8:00 - 10:00	03:11:00	16:01:00	2
July	2015	2015-07-14	Imantodes cenchoa	Chunk-headed Snake	Reptile	1	Waning Crescent (1.5% Full)	Dark	Dry	7:30 - 10:40	04:04:00	16:54:00	3
July	2015	2015-07-17	Leptodeira septentrionalis	Northern Cat-eyed Snake	Reptile	1	Waxing Crescent (3% Full)	Dark	Light Rain	6:00 - 8:00	06:39:00	19:17:00	2
July	2015	2015-07-17	Imantodes cenchoa	Chunk-headed Snake	Reptile	1	Waxing Crescent (3.3% Full)	Dark	Dry	7:30 - 10:20	06:39:00	19:17:00	3
July	2015	2015-07-18	Leptodeira septentrionalis	Northern Cat-eyed Snake	Reptile	2	Waxing Crescent (7.5% Full)	Dark	Dry	7:30 - 10:20	07:27:00	20:00:00	3
July	2015	2015-07-22	Dendrophidion percarinatum	Barred Forest Racer	Reptile	1	Waxing Crescent (37% Full)	Dark	Rainy	6:00 - 8:00	10:28:00	22:42:00	2
July	2015	2015-07-25	Enuliophis sclateri	Sock-headed Snake	Reptile	1	Waxing Gibbous (66.3% Full)	Semi-bright	Dry	7:30 - 10:20	12:49:00	00:07:00	0
July	2015	2015-07-25	Leptodeira septentrionalis	Northern Cat-eyed Snake	Reptile	1	Waxing Gibbous (66.3% Full)	Semi-bright	Dry	7:30 - 10:20	12:49:00	00:07:00	3
July	2015	2015-07-26	Imantodes cenchoa	Chunk-headed Snake	Reptile	1	Waxing Gibbous (75.7% Full)	Semi-bright	Dry	7:15 - 9:30	13:40:00	00:53:00	2.25
July	2015	2015-07-27	Bothriechis schlegelii	Eyelash Pit-Viper	Reptile	1	Waxing Gibbous (84% Full)	Semi-bright	Light Rain	7:30 - 10:30	14:33:00	01:42:00	3
July	2015	2015-07-29	Dendrophidion percarinatum	Barred Forest Racer	Reptile	1	Waxing Gibbous (96.5% Full)	Semi-bright	Light Rain	7:30 - 10:15	16:24:00	03:31:00	2.75
August	2015	2015-08-01	Boa imperator	Boa Constrictor	Reptile	1	Waning Gibbous (97.1% Full)	Bright	Dry	7:30 - 10:30	19:10:00	06:28:00	3
August	2015	2015-08-01	Siphlophis compressus	Red-eyed Tree Snake	Reptile	1	Waning Gibbous (97.1% Full)	Bright	Dry	7:30 - 10:30	19:10:00	06:28:00	0
August	2015	2015-08-03	Imantodes cenchoa	Chunk-headed Snake	Reptile	1	Waning Gibbous (84.8% Full)	Dark	Dry	5:30 - 7:55	20:53:00	08:24:00	2.5
August	2015	2015-08-03	Imantodes cenchoa	Chunk-headed Snake	Reptile	2	Waning Gibbous (83.8% Full)	Dark	Dry	8:00 - 9:45	20:53:00	08:24:00	2.75
August	2015	2015-08-04	Leptodeira septentrionalis	Northern Cat-eyed Snake	Reptile	1	Waning Gibbous (74.5% Full)	Dark	Dry	7:30 - 10:20	21:43:00	09:20:00	3
August	2015	2015-08-07	Leptodeira septentrionalis	Northern Cat-eyed Snake	Reptile	1	Waning Crescent (41.5% Full)	Dark	Light Rain	7:30 - 10:40	-	12:07:00	3
August	2015	2015-08-12	Imantodes cenchoa	Chunk-headed Snake	Reptile	1	Waning Crescent (3% Full)	Dark	Dry	7:30 - 10:30	03:43:00	16:28:00	3
August	2015	2015-08-13	Imantodes cenchoa	Chunk-headed Snake	Reptile	2	Waning Crescent (0.7% Full)	Dark	Rainy	6:00 - 7:15	04:33:00	17:14:00	2.25
August	2015	2015-08-13	Leptodeira septentrionalis	Northern Cat-eyed Snake	Reptile	1	Waning Crescent (0.7% Full)	Dark	Rainy	6:00 - 7:15	04:33:00	17:14:00	0
August	2015	2015-08-14	Imantodes cenchoa	Chunk-headed Snake	Reptile	1	New Moon (0% Full)	Dark	Dry	7:30 - 10:15	05:22:00	17:57:00	2.75
August	2015	2015-08-17	Imantodes cenchoa	Chunk-headed Snake	Reptile	1	Waxing Crescent (9.3% Full)	Dark	Dry	7:30 - 10:20	07:39:00	20:00:00	0
August	2015	2015-08-17	Leptodeira septentrionalis	Northern Cat-eyed Snake	Reptile	1	Waxing Crescent (9.3% Full)	Dark	Dry	7:30 - 10:20	07:39:00	20:00:00	3
August	2015	2015-08-18	Leptodeira septentrionalis	Northern Cat-eyed Snake	Reptile	1	Waxing Crescent (15.5% Full)	Dark	Light Rain	7:30 - 10:30	08:24:00	20:40:00	3
August	2015	2015-08-18	Mastigodryas melanolomus	Neotropical Racer	Reptile	1	Waxing Crescent (15.5% Full)	Dark	Light Rain	7:30 - 10:30	08:24:00	20:40:00	0
August	2015	2015-08-22	Leptodeira septentrionalis	Northern Cat-eyed Snake	Reptile	1	First Quarter (50.5% Full)	Dark	Rainy	7:30 - 10:30	11:31:00	23:33:00	3
August	2015	2015-08-23	Leptodeira septentrionalis	Northern Cat-eyed Snake	Reptile	1	Waxing Gibbous (60.6% Full)	Dark	Dry	7:30 - 10:30	12:22:00	-	3
August	2015	2015-08-24	Enuliophis sclateri	Sock-headed Snake	Reptile	1	Waxing Gibbous (70.8% Full)	Dark	Light Rain	7:45 - 10:15	13:15:00	00:23:00	2.5
August	2015	2015-08-26	Imantodes cenchoa	Chunk-headed Snake	Reptile	1	Waxing Gibbous (88% Full)	Semi-bright	Dry	7:30 - 10:15	15:05:00	02:12:00	2.75
August	2015	2015-08-27	Siphlophis compressus	Red-eyed Tree Snake	Reptile	1	Waxing Gibbous (94.6% Full)	Bright	Dry	7:30 - 10:30	16:00:00	03:11:00	3
September	2015	2015-09-01	Leptodeira septentrionalis	Northern Cat-eyed Snake	Reptile	2	Waning Gibbous (86.4% Full)	Dark	Dry	7:30 - 10:30	20:26:00	08:05:00	3
September	2015	2015-09-05	Leptodeira septentrionalis	Northern Cat-eyed Snake	Reptile	1	Last Quarter (45.2% Full)	Dark	Dry	7:30 - 10:15	23:57:00	11:52:00	2.75
September	2015	2015-09-07	Leptodeira septentrionalis	Northern Cat-eyed Snake	Reptile	1	Waning Crescent (25.6% Full)	Dark	Light Rain	7:30 - 10:30	00:49:00	13:37:00	3
September	2015	2015-09-11	Leptodeira septentrionalis	Northern Cat-eyed Snake	Reptile	1	Waning Crescent (1.8% Full)	Dark	Light Rain	7:30 - 10:15	04:06:00	16:38:00	2.75
September	2015	2015-09-11	Mastigodryas melanolomus	Neotropical Racer	Reptile	1	Waning Crescent (1.8% Full)	Dark	Light Rain	7:30 - 10:15	04:06:00	16:38:00	0
September	2015	2015-09-12	Enuliophis sclateri	Sock-headed Snake	Reptile	1	Waning Crescent (0.1% Full)	Dark	Dry	7:30 - 10:30	04:52:00	17:19:00	3
September	2015	2015-09-14	Leptodeira septentrionalis	Northern Cat-eyed Snake	Reptile	1	Waxing Crescent (2.3% Full)	Dark	Dry	7:30 - 10:15	06:21:00	18:39:00	0
September	2015	2015-09-14	Mastigodryas melanolomus	Neotropical Racer	Reptile	1	Waxing Crescent (2.3% Full)	Dark	Dry	7:30 - 10:15	06:21:00	18:39:00	2.75
September	2015	2015-09-18	Imantodes cenchoa	Chunk-headed Snake	Reptile	1	Waxing Crescent (25.7% Full)	Dark	Dry	7:30 - 10:30	09:26:00	21:29:00	3
September	2015	2015-09-19	Enuliophis sclateri	Sock-headed Snake	Reptile	1	Waxing Crescent (34.8% Full)	Dark	Dry	7:30 - 10:30	10:15:00	22:17:00	3
September	2015	2015-09-20	Leptodeira septentrionalis	Northern Cat-eyed Snake	Reptile	1	Waxing Crescent (44.7% Full)	Dark	Light Rain	7:30 - 10:30	11:06:00	23:07:00	0
September	2015	2015-09-20	Phrynonax poecilonotus	Neotropical Birdsnake	Reptile	1	Waxing Crescent (44.7% Full)	Dark	Light Rain	7:30 - 10:30	11:06:00	23:07:00	3
September	2015	2015-09-24	Imantodes cenchoa	Chunk-headed Snake	Reptile	1	Waxing Gibbous (84.9% Full)	Semi-bright	Dry	7:30 - 10:30	14:39:00	01:52:00	0
September	2015	2015-09-24	Leptodeira septentrionalis	Northern Cat-eyed Snake	Reptile	1	Waxing Gibbous (84.9% Full)	Semi-bright	Dry	7:30 - 10:30	14:39:00	01:52:00	3
November	2015	2015-11-04	Leptodeira septentrionalis	Northern Cat-eyed Snake	Reptile	3	Waning Crescent (37.4% Full)	Dark	Dry	7:30 - 10:15	-	12:36:00	2.75
November	2015	2015-11-06	Boa imperator	Boa Constrictor	Reptile	1	Waning Crescent (20.3% Full)	Dark	Light Rain	7:30 - 10:15	01:32:00	13:58:00	2.75
November	2015	2015-11-06	Leptodeira septentrionalis	Northern Cat-eyed Snake	Reptile	1	Waning Crescent (20.3% Full)	Dark	Light Rain	7:30 - 10:15	01:32:00	13:58:00	0
November	2015	2015-11-09	Boa imperator	Boa Constrictor	Reptile	1	Waning Crescent (3.2% Full)	Dark	Dry	7:30 - 10:25	03:46:00	15:58:00	3
November	2015	2015-11-11	Leptodeira septentrionalis	Northern Cat-eyed Snake	Reptile	1	New Moon (0% Full)	Dark	Dry	7:30 - 10:30	05:20:00	17:24:00	3
November	2015	2015-11-13	Enuliophis sclateri	Sock-headed Snake	Reptile	1	Waxing Crescent (4.4% Full)	Dark	Light Rain	7:30 - 10:30	06:58:00	19:00:00	3
November	2015	2015-11-20	Rhadinella godmani	Yellow-bellied Litter Snake	Reptile	1	Waxing Gibbous (67.6% Full)	Semi-bright	Light Rain	7:30 - 10:45	12:54:00	00:20:00	3.25
November	2015	2015-11-22	Rhadinella godmani	Yellow-bellied Litter Snake	Reptile	1	Waxing Gibbous (87.2% Full)	Bright	Dry	8:00 - 10:00	14:34:00	02:11:00	2
November	2015	2015-11-23	Leptodeira septentrionalis	Northern Cat-eyed Snake	Reptile	1	Waxing Gibbous (93.9% Full)	Bright	Dry	7:30 - 10:15	15:27:00	03:09:00	2.75
November	2015	2015-11-24	Boa imperator	Boa Constrictor	Reptile	1	Waxing Gibbous (98.5% Full)	Bright	Light Rain	7:30 - 10:15	16:21:00	04:07:00	2.75
November	2015	2015-11-26	Enuliophis sclateri	Sock-headed Snake	Reptile	1	Waning Gibbous (98.8% Full)	Bright	Dry	7:30 - 10:30	18:14:00	06:06:00	3
November	2015	2015-11-29	Enuliophis sclateri	Sock-headed Snake	Reptile	1	Waning Gibbous (81.9% Full)	Dark	Light Rain	7:30 - 10:15	21:00:00	08:55:00	2.75
November	2015	2015-11-29	Leptodeira septentrionalis	Northern Cat-eyed Snake	Reptile	1	Waning Gibbous (81.9% Full)	Dark	Light Rain	7:30 - 10:15	21:00:00	08:55:00	0
November	2015	2015-11-29	Leptodeira septentrionalis	Northern Cat-eyed Snake	Reptile	1	Waning Gibbous (81.9% Full)	Dark	Light Rain	7:30 - 10:15	21:00:00	08:55:00	0
November	2015	2015-11-29	Siphlophis compressus	Red-eyed Tree Snake	Reptile	1	Waning Gibbous (81.9% Full)	Dark	Light Rain	7:30 - 10:15	21:00:00	08:55:00	0
November	2015	2015-11-30	Leptodeira septentrionalis	Northern Cat-eyed Snake	Reptile	2	Waning Gibbous (73.4% Full)	Dark	Dry	7:30 - 10:30	21:51:00	09:44:00	3
November	2015	2015-11-30	Mastigodryas melanolomus	Neotropical Racer	Reptile	1	Waning Gibbous (73.4% Full)	Dark	Dry	7:30 - 10:30	21:51:00	09:44:00	0
December	2015	2015-12-01	Enuliophis sclateri	Sock-headed Snake	Reptile	1	Waning Gibbous (65% Full)	Dark	Dry	5:30 - 8:00	22:40:00	10:30:00	2.5
December	2015	2015-12-02	Mastigodryas melanolomus	Neotropical Racer	Reptile	1	Waning Gibbous (54.7% Full)	Dark	Dry	7:30 - 10:15	23:13:00	11:27:00	2.75
December	2015	2015-12-04	Boa imperator	Boa Constrictor	Reptile	1	Waning Crescent (35.9% Full)	Dark	Dry	7:30 - 10:30	00:12:00	12:35:00	0
December	2015	2015-12-04	Enuliophis sclateri	Sock-headed Snake	Reptile	1	Waning Crescent (35.9% Full)	Dark	Dry	7:30 - 10:30	00:12:00	12:35:00	3
December	2015	2015-12-06	Rhadinella godmani	Yellow-bellied Litter Snake	Reptile	1	Waning Crescent (19.1% Full)	Dark	Light Rain	7:30 - 10:30	01:42:00	13:55:00	3
December	2015	2015-12-07	Leptodeira septentrionalis	Northern Cat-eyed Snake	Reptile	1	Waning Crescent (12.2% Full)	Dark	Dry	7:30 - 10:30	02:27:00	14:36:00	3
December	2015	2015-12-09	Enuliophis sclateri	Sock-headed Snake	Reptile	1	Waning Crescent (2.4% Full)	Dark	Dry	7:30 - 10:40	04:02:00	16:05:00	3
December	2015	2015-12-09	Imantodes cenchoa	Chunk-headed Snake	Reptile	1	Waning Crescent (2.4% Full)	Dark	Dry	7:30 - 10:40	04:02:00	16:05:00	0
December	2015	2015-12-09	Leptodeira septentrionalis	Northern Cat-eyed Snake	Reptile	1	Waning Crescent (2.4% Full)	Dark	Dry	7:30 - 10:40	04:02:00	16:05:00	0
December	2015	2015-12-10	Leptodeira septentrionalis	Northern Cat-eyed Snake	Reptile	1	Waning Crescent (0.4% Full)	Dark	Dry	6:00 - 8:00	04:52:00	16:54:00	2
December	2015	2015-12-10	Imantodes cenchoa	Chunk-headed Snake	Reptile	1	Waning Crescent (0.4% Full)	Dark	Dry	7:30 - 10:40	04:52:00	16:54:00	3.25
December	2015	2015-12-10	Leptodeira septentrionalis	Northern Cat-eyed Snake	Reptile	1	Waning Crescent (0.4% Full)	Dark	Dry	7:30 - 10:40	04:52:00	16:54:00	0
December	2015	2015-12-14	Leptodeira septentrionalis	Northern Cat-eyed Snake	Reptile	1	Waxing Crescent (12.6% Full)	Dark	Dry	7:30 - 10:30	08:22:00	20:27:00	3
December	2015	2015-12-18	Mastigodryas melanolomus	Neotropical Racer	Reptile	1	First Quarter (52.7% Full)	Dark	Dry	8:00 - 10:15	11:40:00	-	2.25
December	2015	2015-12-20	Bothrops asper	Fer-de-lance	Reptile	1	Waxing Gibbous (73.5% Full)	Semi-bright	Dry	5:30 - 7:55	13:19:00	01:00:00	2.5
December	2015	2015-12-22	Boa imperator	Boa Constrictor	Reptile	1	Waxing Gibbous (91.6% Full)	Bright	Dry	8:00 - 10:00	15:04:00	02:53:00	2
December	2015	2015-12-23	Imantodes cenchoa	Chunk-headed Snake	Reptile	1	Waxing Gibbous (96.8% Full)	Bright	Dry	7:30 - 10:30	15:59:00	03:51:00	3
December	2015	2015-12-24	Imantodes cenchoa	Chunk-headed Snake	Reptile	1	Waxing Gibbous (99.5% Full)	Bright	Dry	7:30 - 10:20	4:55PM	04:49:00	3
December	2015	2015-12-25	Imantodes cenchoa	Chunk-headed Snake	Reptile	1	Full Moon (99.8% Full)	Bright	Dry	5:30 - 8:00	5:51PM	05:47:00	2.5
December	2015	2015-12-25	Imantodes cenchoa	Chunk-headed Snake	Reptile	1	Full Moon (99.7% Full)	Bright	Dry	7:30 - 10:15	5:51PM	05:47:00	2.75
December	2015	2015-12-25	Leptophis ahaetulla	Giant Parrot Snake	Reptile	1	Full Moon (99.7% Full)	Bright	Dry	7:30 - 10:15	5:51PM	05:47:00	0
December	2015	2015-12-28	Leptodeira septentrionalis	Northern Cat-eyed Snake	Reptile	1	Waning Gibbous (87.8% Full)	Dark	Dry	6:00 - 8:00	20:30:00	08:21:00	2
December	2015	2015-12-28	Clelia clelia	Mussurana	Reptile	1	Waning Gibbous (87.2% Full)	Dark	Dry	8:00 - 10:15	20:30:00	08:21:00	2.25
December	2015	2015-12-28	Leptodeira septentrionalis	Northern Cat-eyed Snake	Reptile	1	Waning Gibbous (87.2% Full)	Dark	Dry	8:00 - 10:15	20:30:00	08:21:00	0
December	2015	2015-12-29	Leptodeira septentrionalis	Northern Cat-eyed Snake	Reptile	1	Waning Gibbous (80% Full)	Dark	Light Rain	7:30 - 10:30	21:19:00	09:07:00	3
January	2016	2016-01-01	Leptophis ahaetulla	Giant Parrot Snake	Reptile	1	Last Quarter (54.4% Full)	Dark	Dry	6:00 - 8:00	23:35:00	11:11:00	2
January	2016	2016-01-01	Leptodeira septentrionalis	Northern Cat-eyed Snake	Reptile	1	Last Quarter (53.6% Full)	Dark	Dry	7:30 - 10:15	23:35:00	11:11:00	2.75
January	2016	2016-01-02	Imantodes cenchoa	Chunk-headed Snake	Reptile	1	Waning Crescent (44.9% Full)	Dark	Dry	5:30 - 7:55	-	11:51:00	0
January	2016	2016-01-02	Leptodeira septentrionalis	Northern Cat-eyed Snake	Reptile	1	Waning Crescent (44.9% Full)	Dark	Dry	5:30 - 7:55	-	11:51:00	2.5
January	2016	2016-01-03	Leptodeira septentrionalis	Northern Cat-eyed Snake	Reptile	1	Waning Crescent (34.9% Full)	Dark	Dry	7:30 - 10:15	00:20:00	12:31:00	2.75
January	2016	2016-01-04	Enuliophis sclateri	Sock-headed Snake	Reptile	1	Waning Crescent (26.1% Full)	Dark	Dry	7:30 - 10:30	01:06:00	13:14:00	3
January	2016	2016-01-04	Enuliophis sclateri	Sock-headed Snake	Reptile	1	Waning Crescent (26.1% Full)	Dark	Dry	7:30 - 10:30	01:06:00	13:14:00	0
January	2016	2016-01-05	Bothrops asper	Fer-de-lance	Reptile	1	Waning Crescent (18.2% Full)	Dark	Dry	7:30 - 10:15	01:53:00	13:58:00	2.75
January	2016	2016-01-11	Dendrophidion percarinatum	Barred Forest Racer	Reptile	1	Waxing Crescent (3.9% Full)	Dark	Dry	7:30 - 10:30	07:07:00	19:15:00	0
January	2016	2016-01-11	Leptodeira septentrionalis	Northern Cat-eyed Snake	Reptile	1	Waxing Crescent (3.9% Full)	Dark	Dry	7:30 - 10:30	07:07:00	19:15:00	3
January	2016	2016-01-16	Bothrops asper	Fer-de-lance	Reptile	1	First Quarter (% Full)	Dark	Dry	7:30 - 10:15	11:16:00	23:51:00	2.75
January	2016	2016-01-17	Leptophis ahaetulla	Giant Parrot Snake	Reptile	1	Waxing Gibbous (59.9% Full)	Dark	Dry	7:30 - 10:15	12:06:00	-	2.75
January	2016	2016-01-21	Leptodeira septentrionalis	Northern Cat-eyed Snake	Reptile	1	Waxing Gibbous (94.5% Full)	Semi-bright	Dry	7:30 - 10:15	15:41:00	03:36:00	2.75
January	2016	2016-01-22	Leptodeira septentrionalis	Northern Cat-eyed Snake	Reptile	1	Waxing Gibbous (98.4% Full)	Bright	Dry	7:30 - 10:15	16:35:00	04:31:00	2.75
January	2016	2016-01-25	Imantodes cenchoa	Chunk-headed Snake	Reptile	1	Waning Gibbous (96.7% Full)	Dark	Dry	7:30 - 10:30	19:10:00	06:59:00	3
January	2016	2016-01-25	Leptodeira septentrionalis	Northern Cat-eyed Snake	Reptile	1	Waning Gibbous (96.7% Full)	Dark	Dry	7:30 - 10:30	19:10:00	06:59:00	0
January	2016	2016-01-30	Enuliophis sclateri	Sock-headed Snake	Reptile	1	Waning Gibbous (61.8% Full)	Dark	Dry	8:00 - 10:00	22:59:00	10:26:00	2
February	2016	2016-02-01	Leptodeira septentrionalis	Northern Cat-eyed Snake	Reptile	1	Waning Crescent (43.2% Full)	Dark	Dry	7:30 - 10:25	-	11:51:00	3
February	2016	2016-02-02	Imantodes cenchoa	Chunk-headed Snake	Reptile	1	Waning Crescent (33.8% Full)	Dark	Dry	7:30 - 10:20	00:32:00	12:36:00	3
February	2016	2016-02-04	Enuliophis sclateri	Sock-headed Snake	Reptile	1	Waning Crescent (16.5% Full)	Dark	Dry	7:30 - 10:30	02:13:00	14:14:00	3
February	2016	2016-02-05	Bothriechis schlegelii	Eyelash Viper	Reptile	1	Waning Crescent (9.6% Full)	Dark	Dry	8:00 - 10:00	03:06:00	15:08:00	2
February	2016	2016-02-06	Imantodes cenchoa	Chunk-headed Snake	Reptile	1	Waning Crescent (4.1% Full)	Dark	Dry	7:30 - 10:20	04:00:00	16:04:00	3
February	2016	2016-02-06	Leptodeira septentrionalis	Northern Cat-eyed Snake	Reptile	1	Waning Crescent (4.1% Full)	Dark	Dry	7:30 - 10:20	04:00:00	16:04:00	0
February	2016	2016-02-06	Leptodeira septentrionalis	Northern Cat-eyed Snake	Reptile	1	Waning Crescent (4.1% Full)	Dark	Dry	7:30 - 10:20	04:00:00	16:04:00	0
February	2016	2016-02-06	Siphlophis compressus	Red-eyed Tree Snake	Reptile	1	Waning Crescent (4.1% Full)	Dark	Dry	7:30 - 10:20	04:00:00	16:04:00	0
February	2016	2016-02-07	Siphlophis compressus	Red-eyed Tree Snake	Reptile	1	Waning Crescent (0.7% Full)	Dark	Dry	7:30 - 10:20	04:54:00	17:01:00	3
February	2016	2016-02-09	Leptodeira septentrionalis	Northern Cat-eyed Snake	Reptile	2	Waxing Crescent (2.1% Full)	Dark	Dry	7:30 - 10:00	06:40:00	18:56:00	2.5
February	2016	2016-02-10	Leptodeira septentrionalis	Northern Cat-eyed Snake	Reptile	1	Waxing Crescent (6.8% Full)	Dark	Dry	7:30 - 10:25	07:32:00	19:53:00	3
February	2016	2016-02-11	Leptodeira septentrionalis	Northern Cat-eyed Snake	Reptile	1	Waxing Crescent (13.9% Full)	Dark	Dry	7:30 - 10:30	08:22:00	20:49:00	3
February	2016	2016-02-16	Enuliophis sclateri	Sock-headed Snake	Reptile	1	Waxing Gibbous (66.9% Full)	Semi-bright	Dry	8:00 - 10:00	12:41:00	00:35:00	2
February	2016	2016-02-18	Leptodeira septentrionalis	Northern Cat-eyed Snake	Reptile	1	Waxing Gibbous (84.8% Full)	Bright	Dry	7:30 - 10:20	14:29:00	02:25:00	2.75
February	2016	2016-02-22	Enuliophis sclateri	Sock-headed Snake	Reptile	1	Full Moon (100% Full)	Bright	Dry	7:30 - 10:15	17:51:00	05:39:00	2.75
March	2016	2016-03-01	Boa imperator	Boa Constrictor	Reptile	1	Last Quarter (51.1% Full)	Dark	Dry	7:30 - 10:30	-	11:15:00	3
March	2016	2016-03-01	Leptodeira septentrionalis	Northern Cat-eyed Snake	Reptile	1	Last Quarter (51.1% Full)	Dark	Dry	7:30 - 10:30	-	11:15:00	0
March	2016	2016-03-01	Siphlophis compressus	Red-eyed Tree Snake	Reptile	1	Last Quarter (51.1% Full)	Dark	Dry	7:30 - 10:30	-	11:15:00	0
March	2016	2016-03-03	Leptodeira septentrionalis	Northern Cat-eyed Snake	Reptile	1	Waning Crescent (32.1% Full)	Dark	Dry	6:00 - 7:30	00:54:00	12:55:00	2.5
March	2016	2016-03-04	Leptodeira septentrionalis	Northern Cat-eyed Snake	Reptile	1	Waning Crescent (22.2% Full)	Dark	Dry	7:30 - 10:30	01:46:00	13:48:00	3
March	2016	2016-03-05	Boa imperator	Boa Constrictor	Reptile	1	Waning Crescent (13.6% Full)	Dark	Light Rain	7:30 - 10:30	02:39:00	14:44:00	3
March	2016	2016-03-05	Enuliophis sclateri	Sock-headed Snake	Reptile	1	Waning Crescent (13.6% Full)	Dark	Light Rain	7:30 - 10:30	02:39:00	14:44:00	0
March	2016	2016-03-05	Leptodeira septentrionalis	Northern Cat-eyed Snake	Reptile	1	Waning Crescent (13.6% Full)	Dark	Light Rain	7:30 - 10:30	02:39:00	14:44:00	0
March	2016	2016-03-09	Phrynonax poecilonotus	Neotropical Birdsnake	Reptile	1	Waxing Crescent (0.9% Full)	Dark	Dry	7:30 - 10:30	06:10:00	18:35:00	3
March	2016	2016-03-11	Enuliophis sclateri	Sock-headed Snake	Reptile	1	Waxing Crescent (11.4% Full)	Dark	Dry	8:00 - 10:00	07:54:00	20:32:00	2
March	2016	2016-03-12	Imantodes cenchoa	Chunk-headed Snake	Reptile	1	Waxing Crescent (19.6% Full)	Dark	Dry	7:30 - 10:30	08:48:00	21:30:00	3
March	2016	2016-03-18	Imantodes cenchoa	Chunk-headed Snake	Reptile	1	Waxing Gibbous (80.9% Full)	Dark	Dry	8:00 - 10:00	14:10:00	02:04:00	2
March	2016	2016-03-18	Leptodeira septentrionalis	Northern Cat-eyed Snake	Reptile	1	Waxing Gibbous (80.9% Full)	Dark	Dry	8:00 - 10:00	14:10:00	02:04:00	0
March	2016	2016-03-20	Leptodeira septentrionalis	Northern Cat-eyed Snake	Reptile	1	Waxing Gibbous (93.6% Full)	Semi-bright	Light Rain	7:30 - 10:30	15:48:00	03:37:00	3
March	2016	2016-03-23	Leptodeira septentrionalis	Northern Cat-eyed Snake	Reptile	1	Full Moon (100% Full)	Semi-bright	Dry	7:30 - 10:30	18:05:00	05:42:00	3
March	2016	2016-03-23	Leptophis ahaetulla	Giant Parrot Snake	Reptile	1	Full Moon (100% Full)	Semi-bright	Dry	7:30 - 10:30	18:05:00	05:42:00	0
March	2016	2016-03-24	Boa imperator	Boa Constrictor	Reptile	1	Waning Gibbous (98.2% Full)	Semi-bright	Dry	7:30 - 10:15	18:50:00	06:22:00	0
March	2016	2016-03-24	Leptodeira septentrionalis	Northern Cat-eyed Snake	Reptile	1	Waning Gibbous (98.2% Full)	Semi-bright	Dry	7:30 - 10:15	18:50:00	06:22:00	2.75
March	2016	2016-03-26	Leptodeira septentrionalis	Northern Cat-eyed Snake	Reptile	1	Waning Gibbous (90% Full)	Dark	Dry	8:00 - 10:00	20:21:00	07:44:00	2
March	2016	2016-03-28	Boa imperator	Boa Constrictor	Reptile	1	Waning Gibbous (76.3% Full)	Dark	Dry	7:30 - 10:15	21:56:00	09:11:00	2.75
March	2016	2016-03-28	Imantodes cenchoa	Chunk-headed Snake	Reptile	1	Waning Gibbous (76.3% Full)	Dark	Dry	7:30 - 10:15	21:56:00	09:11:00	0
March	2016	2016-03-28	Leptodeira septentrionalis	Northern Cat-eyed Snake	Reptile	2	Waning Gibbous (76.3% Full)	Dark	Dry	7:30 - 10:15	21:56:00	09:11:00	0
March	2016	2016-03-30	Enuliophis sclateri	Sock-headed Snake	Reptile	1	Waning Gibbous (57.8% Full)	Dark	Dry	8:00 - 10:00	23:36:00	10:46:00	2
April	2016	2016-04-02	Leptodeira septentrionalis	Northern Cat-eyed Snake	Reptile	1	Waning Crescent (27.4% Full)	Dark	Dry	7:30 - 10:30	01:19:00	13:25:00	3
April	2016	2016-04-03	Imantodes cenchoa	Chunk-headed Snake	Reptile	2	Waning Crescent (17.7% Full)	Dark	Dry	8:00 - 10:00	02:11:00	14:21:00	2
April	2016	2016-04-05	Imantodes cenchoa	Chunk-headed Snake	Reptile	1	Waning Crescent (3.9% Full)	Dark	Dry	7:30 - 10:15	03:54:00	16:16:00	2.75
April	2016	2016-04-05	Leptodeira septentrionalis	Northern Cat-eyed Snake	Reptile	1	Waning Crescent (3.9% Full)	Dark	Dry	7:30 - 10:15	03:54:00	16:16:00	0
April	2016	2016-04-06	Enuliophis sclateri	Sock-headed Snake	Reptile	1	Waning Crescent (0.5% Full)	Dark	Dry	7:30 - 10:45	04:46:00	17:14:00	3.25
April	2016	2016-04-06	Imantodes cenchoa	Chunk-headed Snake	Reptile	1	Waning Crescent (0.5% Full)	Dark	Dry	7:30 - 10:45	04:46:00	17:14:00	0
April	2016	2016-04-06	Leptodeira septentrionalis	Northern Cat-eyed Snake	Reptile	1	Waning Crescent (0.5% Full)	Dark	Dry	7:30 - 10:45	04:46:00	17:14:00	0
April	2016	2016-04-06	Leptodeira septentrionalis	Northern Cat-eyed Snake	Reptile	1	Waning Crescent (0.5% Full)	Dark	Dry	7:30 - 10:45	04:46:00	17:14:00	0
April	2016	2016-04-06	Mastigodryas melanolomus	Neotropical Racer	Reptile	1	Waning Crescent (0.5% Full)	Dark	Dry	7:30 - 10:45	04:46:00	17:14:00	0
April	2016	2016-04-09	Leptodeira septentrionalis	Northern Cat-eyed Snake	Reptile	1	Waxing Crescent (8% Full)	Dark	Dry	5:30 - 8:30	07:28:00	20:14:00	3
April	2016	2016-04-10	Enuliophis sclateri	Sock-headed Snake	Reptile	1	Waxing Crescent (15.7% Full)	Dark	Dry	6:00 - 8:00	08:25:00	21:14:00	0
April	2016	2016-04-10	Imantodes cenchoa	Chunk-headed Snake	Reptile	1	Waxing Crescent (15.7% Full)	Dark	Dry	6:00 - 8:00	08:25:00	21:14:00	2
April	2016	2016-04-10	Imantodes cenchoa	Chunk-headed Snake	Reptile	1	Waxing Crescent (16.5% Full)	Dark	Dry	8:00 - 10:00	08:25:00	21:14:00	2
April	2016	2016-04-12	Imantodes cenchoa	Chunk-headed Snake	Reptile	1	Waxing Crescent (35.9% Full)	Dark	Dry	7:30 - 10:30	10:18:00	23:08:00	0
April	2016	2016-04-12	Mastigodryas melanolomus	Neotropical Racer	Reptile	1	Waxing Crescent (35.9% Full)	Dark	Dry	7:30 - 10:30	10:18:00	23:08:00	3
April	2016	2016-04-13	Imantodes cenchoa	Chunk-headed Snake	Reptile	1	First Quarter (46.5% Full)	Dark	Dry	7:30 - 10:45	11:13:00	-	3.25
April	2016	2016-04-21	Bothrops asper	Fer-de-lance	Reptile	1	Full Moon (99.9% Full)	Bright	Dry	7:15 - 9:30	17:33:00	05:02:00	2.25
April	2016	2016-04-24	Leptodeira septentrionalis	Northern Cat-eyed Snake	Reptile	1	Waning Gibbous (93.8% Full)	Dark	Dry	7:30 - 10:15	19:54:00	07:09:00	2.75
April	2016	2016-04-29	Imantodes cenchoa	Chunk-headed Snake	Reptile	1	Last Quarter (53.2% Full)	Dark	Light Rain	7:30 - 10:30	-	11:16:00	3
June	2016	2016-06-01	Leptodeira septentrionalis	Northern Cat-eyed Snake	Reptile	1	Waning Crescent (15% Full)	Dark	Dry	7:30 - 10:30	02:04:00	14:37:00	3
June	2016	2016-06-03	Leptodeira septentrionalis	Northern Cat-eyed Snake	Reptile	2	Waning Crescent (2.3% Full)	Dark	Dry	7:30 - 10:20	03:50:00	16:36:00	3
June	2016	2016-06-03	Mastigodryas melanolomus	Neotropical Racer	Reptile	1	Waning Crescent (2.3% Full)	Dark	Dry	7:30 - 10:20	03:50:00	16:36:00	0
June	2016	2016-06-04	Leptodeira septentrionalis	Northern Cat-eyed Snake	Reptile	1	New Moon (0% Full)	Dark	Dry	7:30 - 10:15	04:47:00	17:38:00	2.75
June	2016	2016-06-04	Leptodeira septentrionalis	Northern Cat-eyed Snake	Reptile	1	New Moon (0% Full)	Dark	Dry	7:30 - 10:15	04:47:00	17:38:00	0
June	2016	2016-06-10	Imantodes cenchoa	Chunk-headed Snake	Reptile	1	Waxing Crescent (35.6% Full)	Dark	Light Rain	7:30 - 10:15	10:23:00	22:56:00	2.75
June	2016	2016-06-14	Imantodes cenchoa	Chunk-headed Snake	Reptile	1	Waxing Gibbous (73.1% Full)	Dark	Light Rain	7:30 - 10:15	13:27:00	00:59:00	2.75
June	2016	2016-06-16	Leptodeira septentrionalis	Northern Cat-eyed Snake	Reptile	1	Waxing Gibbous (88.1% Full)	Semi-bright	Dry	8:00 - 10:00	14:58:00	02:20:00	2
June	2016	2016-06-19	Imantodes cenchoa	Chunk-headed Snake	Reptile	1	Waxing Gibbous (99.7% Full)	Semi-bright	Light Rain	8:00 - 10:00	17:24:00	04:35:00	2
June	2016	2016-06-23	Enuliophis sclateri	Sock-headed Snake	Reptile	1	Waning Gibbous (88% Full)	Dark	Dry	8:00 - 11:00	20:47:00	08:02:00	0
June	2016	2016-06-23	Leptodeira septentrionalis	Northern Cat-eyed Snake	Reptile	1	Waning Gibbous (88% Full)	Dark	Dry	8:00 - 11:00	20:47:00	08:02:00	3
June	2016	2016-06-29	Leptodeira septentrionalis	Northern Cat-eyed Snake	Reptile	1	Waning Crescent (26.8% Full)	Dark	Dry	7:30 - 10:15	00:48:00	13:25:00	2.75
June	2016	2016-06-29	Leptodeira septentrionalis	Northern Cat-eyed Snake	Reptile	1	Waning Crescent (26.8% Full)	Dark	Dry	7:30 - 10:15	00:48:00	13:25:00	2.75
July	2016	2016-07-08	Leptodeira septentrionalis	Northern Cat-eyed Snake	Reptile	1	Waxing Crescent (21.1% Full)	Dark	Dry	8:00 - 11:00	09:03:00	21:33:00	3
July	2016	2016-07-08	Leptodeira septentrionalis	Northern Cat-eyed Snake	Reptile	1	Waxing Crescent (21.1% Full)	Dark	Dry	8:00 - 11:00	09:03:00	21:33:00	0
July	2016	2016-07-09	Enuliophis sclateri	Sock-headed Snake	Reptile	1	Waxing Crescent (29.6% Full)	Dark	Dry	7:30 - 10:15	09:50:00	22:15:00	2.75
July	2016	2016-07-19	Enuliophis sclateri	Sock-headed Snake	Reptile	1	Full Moon (100% Full)	Semi-bright	Light Rain	7:30 - 10:30	17:51:00	05:01:00	3
July	2016	2016-07-19	Mastigodryas melanolomus	Neotropical Racer	Reptile	1	Full Moon (100% Full)	Semi-bright	Light Rain	7:30 - 10:30	17:51:00	05:01:00	0
July	2016	2016-07-21	Imantodes cenchoa	Chunk-headed Snake	Reptile	1	Waning Gibbous (95.8% Full)	Semi-bright	Dry	7:30 - 10:30	19:32:00	06:49:00	3
July	2016	2016-07-23	Leptodeira septentrionalis	Northern Cat-eyed Snake	Reptile	1	Waning Gibbous (82.5% Full)	Dark	Rainy	7:30 - 10:30	21:09:00	08:37:00	3
July	2016	2016-07-26	Leptodeira septentrionalis	Northern Cat-eyed Snake	Reptile	1	Last Quarter (51.3% Full)	Dark	Dry	7:30 - 10:30	23:36:00	11:20:00	3
July	2016	2016-07-26	Leptodeira septentrionalis	Northern Cat-eyed Snake	Reptile	1	Last Quarter (51.3% Full)	Dark	Dry	7:30 - 10:30	23:36:00	11:20:00	0
July	2016	2016-07-28	Leptodeira septentrionalis	Northern Cat-eyed Snake	Reptile	1	Waning Crescent (28.9% Full)	Dark	Dry	7:30 - 10:15	00:28:00	13:14:00	2.75
July	2016	2016-07-31	Leptodeira septentrionalis	Northern Cat-eyed Snake	Reptile	1	Waning Crescent (4.9% Full)	Dark	Dry	7:30 - 10:30	03:15:00	16:07:00	3
August	2016	2016-08-04	Imantodes cenchoa	Chunk-headed Snake	Reptile	1	Waxing Crescent (4.1% Full)	Dark	Dry	5:30 - 8:00	06:53:00	19:27:00	2.5
August	2016	2016-08-04	Leptodeira septentrionalis	Northern Cat-eyed Snake	Reptile	1	Waxing Crescent (4.5% Full)	Dark	Dry	7:30 - 10:15	06:53:00	19:27:00	2.75
August	2016	2016-08-07	Boa imperator	Boa Constrictor	Reptile	1	Waxing Crescent (23.7% Full)	Dark	Light Rain	7:30 - 10:30	09:16:00	21:33:00	3
August	2016	2016-08-08	Leptodeira septentrionalis	Northern Cat-eyed Snake	Reptile	1	Waxing Crescent (32.4% Full)	Dark	Light Rain	7:30 - 10:30	10:01:00	22:13:00	3
August	2016	2016-08-10	Leptodeira septentrionalis	Northern Cat-eyed Snake	Reptile	1	First Quarter (50.9% Full)	Dark	Light Rain	7:30 - 10:30	11:33:00	23:37:00	3
August	2016	2016-08-12	Enuliophis sclateri	Sock-headed Snake	Reptile	1	Waxing Gibbous (69.5% Full)	Dark	Dry	7:30 - 10:30	13:08:00	00:22:00	3
August	2016	2016-08-16	Corallus ruschenbergerii	Northern Tree Boa	Reptile	1	Waxing Gibbous (97.2% Full)	Bright	Dry	8:00 - 10:00	16:32:00	03:43:00	2
August	2016	2016-08-17	Leptodeira septentrionalis	Northern Cat-eyed Snake	Reptile	1	Waxing Gibbous (99.7% Full)	Bright	Dry	7:30 - 10:40	17:23:00	04:38:00	3
August	2016	2016-08-19	Corallus ruschenbergerii	Northern Tree Boa	Reptile	1	Waning Gibbous (97.2% Full)	Semi-bright	Dry	7:30 - 10:15	19:04:00	06:29:00	2.75
August	2016	2016-08-21	Imantodes cenchoa	Chunk-headed Snake	Reptile	1	Waning Gibbous (84.8% Full)	Dark	Rainy	7:30 - 10:30	20:43:00	08:20:00	3
August	2016	2016-08-22	Leptodeira septentrionalis	Northern Cat-eyed Snake	Reptile	1	Waning Gibbous (75.1% Full)	Dark	Dry	7:30 - 10:25	21:34:00	09:15:00	3
August	2016	2016-08-27	Leptodeira septentrionalis	Northern Cat-eyed Snake	Reptile	1	Waning Crescent (21.6% Full)	Dark	Dry	7:30 - 10:40	01:09:00	14:00:00	3
August	2016	2016-08-30	Leptophis ahaetulla	Giant Parrot Snake	Reptile	1	Waning Crescent (2.4% Full)	Dark	Light Rain	7:30 - 10:30	03:53:00	16:35:00	3
September	2016	2016-09-06	Leptodeira septentrionalis	Northern Cat-eyed Snake	Reptile	1	Waxing Crescent (25.9% Full)	Dark	Dry	7:30 - 10:20	09:27:00	21:33:00	3
September	2016	2016-09-08	Leptodeira septentrionalis	Northern Cat-eyed Snake	Reptile	1	Waxing Crescent (43.8% Full)	Dark	Dry	7:30 - 10:20	11:01:00	23:01:00	3
September	2016	2016-09-18	Imantodes cenchoa	Chunk-headed Snake	Reptile	1	Waning Gibbous (93.9% Full)	Semi-bright	Dry	7:30 - 10:30	19:26:00	07:04:00	3
November	2016	2016-11-06	Imantodes cenchoa	Chunk-headed Snake	Reptile	1	Waxing Crescent (40.1% Full)	Dark	Dry	7:30 - 10:30	10:53:00	22:56:00	3
November	2016	2016-11-07	Imantodes cenchoa	Chunk-headed Snake	Reptile	1	First Quarter (50.4% Full)	Dark	Dry	7:30 - 10:30	11:41:00	23:48:00	3
November	2016	2016-11-13	Leptodeira septentrionalis	Northern Cat-eyed Snake	Reptile	1	Waxing Gibbous (99.3% Full)	Semi-bright	Rainy	7:30 - 10:15	16:42:00	04:24:00	2.75
November	2016	2016-11-15	Leptodeira septentrionalis	Northern Cat-eyed Snake	Reptile	1	Waning Gibbous (97.4% Full)	Dark	Rainy	8:00 - 10:15	18:38:00	06:28:00	2.25
November	2016	2016-11-25	Mastigodryas melanolomus	Neotropical Racer	Reptile	1	Waning Crescent (11.6% Full)	Dark	Light Rain	7:30 - 10:30	02:32:00	14:46:00	3
November	2016	2016-11-30	Clelia clelia	Mussurana	Reptile	1	Waxing Crescent (1.7% Full)	Dark	Light Rain	7:30 - 10:30	06:24:00	18:23:00	3
November	2016	2016-11-30	Leptodeira septentrionalis	Northern Cat-eyed Snake	Reptile	1	Waxing Crescent (1.7% Full)	Dark	Light Rain	7:30 - 10:30	06:24:00	18:23:00	0
December	2016	2016-12-16	Leptodeira septentrionalis	Northern Cat-eyed Snake	Reptile	1	Waning Gibbous (89% Full)	Dark	Dry	7:30 - 10:30	20:17:00	08:10:00	3
December	2016	2016-12-19	Imantodes cenchoa	Chunk-headed Snake	Reptile	1	Waning Gibbous (63.1% Full)	Dark	Dry	5:30 - 7:50	22:55:00	10:39:00	2.25
December	2016	2016-12-19	Leptophis ahaetulla	Giant Parrot Snake	Reptile	1	Waning Gibbous (62.1% Full)	Dark	Dry	8:00 - 10:00	22:55:00	10:39:00	2
December	2016	2016-12-21	Imantodes cenchoa	Chunk-headed Snake	Reptile	1	Waning Crescent (42.7% Full)	Dark	Dry	7:30 - 10:30	-	12:04:00	3
December	2016	2016-12-22	Imantodes cenchoa	Chunk-headed Snake	Reptile	1	Waning Crescent (33% Full)	Dark	Dry	8:00 - 10:15	00:28:00	12:44:00	2.25
December	2016	2016-12-23	Clelia clelia	Mussurana	Reptile	1	Waning Crescent (24.8% Full)	Dark	Dry	7:30 - 10:30	01:14:00	13:25:00	3
January	2017	2017-01-01	Leptodeira septentrionalis	Northern Cat-eyed Snake	Reptile	1	Waxing Crescent (12.4% Full)	Dark	Dry	7:30 - 10:00	08:24:00	20:31:00	2.5
January	2017	2017-01-02	Leptodeira septentrionalis	Northern Cat-eyed Snake	Reptile	1	Waxing Crescent (19.3% Full)	Dark	Dry	5:30 - 7:50	09:11:00	21:22:00	2.25
January	2017	2017-01-02	Leptodeira septentrionalis	Northern Cat-eyed Snake	Reptile	1	Waxing Crescent (20.2% Full)	Dark	Dry	7:45 - 10:15	09:11:00	21:22:00	2.5
January	2017	2017-01-05	Rhadinella godmani	Yellow-bellied Litter Snake	Reptile	1	First Quarter (50.9% Full)	Dark	Dry	7:30 - 10:15	11:30:00	23:59:00	2.75
January	2017	2017-01-15	Clelia clelia	Mussurana	Reptile	1	Waning Gibbous (87% Full)	Dark	Dry	5:30 - 7:50	20:44:00	08:30:00	2.25
January	2017	2017-01-15	Leptodeira septentrionalis	Northern Cat-eyed Snake	Reptile	1	Waning Gibbous (86.2% Full)	Dark	Dry	7:30 - 10:30	20:44:00	08:30:00	3
January	2017	2017-01-18	Imantodes cenchoa	Chunk-headed Snake	Reptile	1	Waning Gibbous (60.4% Full)	Dark	Dry	7:30 - 10:40	23:08:00	10:40:00	3
January	2017	2017-01-18	Leptodeira septentrionalis	Northern Cat-eyed Snake	Reptile	1	Waning Gibbous (60.4% Full)	Dark	Dry	7:30 - 10:40	23:08:00	10:40:00	0
January	2017	2017-01-20	Leptodeira septentrionalis	Northern Cat-eyed Snake	Reptile	1	Waning Crescent (41.3% Full)	Dark	Dry	7:30 - 10:30	-	12:02:00	3
January	2017	2017-01-22	Leptodeira septentrionalis	Northern Cat-eyed Snake	Reptile	1	Waning Crescent (23.9% Full)	Dark	Dry	7:30 - 10:30	01:26:00	13:28:00	3
January	2017	2017-01-23	Leptodeira septentrionalis	Northern Cat-eyed Snake	Reptile	1	Waning Crescent (16.2% Full)	Dark	Dry	7:30 - 10:30	02:13:00	14:13:00	3
January	2017	2017-01-26	Bothriechis schlegelii	Eyelash Pit Viper	Reptile	1	Waning Crescent (1.4% Full)	Dark	Dry	7:30 - 10:30	04:41:00	16:41:00	3
January	2017	2017-01-26	Leptodeira septentrionalis	Northern Cat-eyed Snake	Reptile	1	Waning Crescent (1.4% Full)	Dark	Dry	7:30 - 10:30	04:41:00	16:41:00	0
January	2017	2017-01-26	Leptophis ahaetulla	Giant Parrot Snake	Reptile	1	Waning Crescent (1.4% Full)	Dark	Dry	7:30 - 10:30	04:41:00	16:41:00	0
January	2017	2017-01-27	Clelia clelia	Mussurana	Reptile	1	New Moon (0% Full)	Dark	Dry	7:30 - 10:30	05:31:00	17:33:00	3
January	2017	2017-01-28	Bothrops asper	Fer-de-lance	Reptile	1	Waxing Crescent (0.8% Full)	Dark	Dry	7:30 - 10:30	06:20:00	18:26:00	3
January	2017	2017-01-29	Leptodeira septentrionalis	Northern Cat-eyed Snake	Reptile	2	Waxing Crescent (3.8% Full)	Dark	Dry	7:30 - 10:30	07:08:00	19:18:00	3
February	2017	2017-02-02	Leptodeira septentrionalis	Northern Cat-eyed Snake	Reptile	2	Waxing Crescent (35.2% Full)	Dark	Dry	7:30 - 10:30	10:16:00	22:49:00	3
February	2017	2017-02-11	Leptodeira septentrionalis	Northern Cat-eyed Snake	Reptile	2	Waning Gibbous (99.1% Full)	Semi-bright	Dry	7:30 - 10:30	18:31:00	06:18:00	3
February	2017	2017-02-14	Leptodeira septentrionalis	Northern Cat-eyed Snake	Reptile	2	Waning Gibbous (84.6% Full)	Dark	Dry	7:30 - 10:30	20:59:00	08:33:00	3
February	2017	2017-02-20	Leptodeira septentrionalis	Northern Cat-eyed Snake	Reptile	2	Waning Crescent (31.9% Full)	Dark	Dry	5:45 - 7:55	00:53:00	12:53:00	2.25
February	2017	2017-02-20	Imantodes cenchoa	Chunk-headed Snake	Reptile	1	Waning Crescent (31.2% Full)	Dark	Dry	7:30 - 10:30	00:53:00	12:53:00	3
February	2017	2017-02-22	Imantodes cenchoa	Chunk-headed Snake	Reptile	1	Waning Crescent (15.4% Full)	Dark	Dry	6:00 - 7:00	02:31:00	14:31:00	1
February	2017	2017-02-25	Leptodeira septentrionalis	Northern Cat-eyed Snake	Reptile	1	Waning Crescent (0.7% Full)	Dark	Dry	7:30 - 10:30	05:00:00	17:09:00	3
February	2017	2017-02-25	Leptodeira septentrionalis	Northern Cat-eyed Snake	Reptile	1	Waning Crescent (0.7% Full)	Dark	Dry	7:30 - 10:30	05:00:00	17:09:00	0
February	2017	2017-02-27	Leptodeira septentrionalis	Northern Cat-eyed Snake	Reptile	1	Waxing Crescent (1.9% Full)	Dark	Dry	7:30 - 10:30	06:37:00	18:56:00	3
March	2017	2017-03-02	Leptodeira septentrionalis	Northern Cat-eyed Snake	Reptile	1	Waxing Crescent (21.5% Full)	Dark	Dry	7:30 - 10:15	09:02:00	21:40:00	2.75
March	2017	2017-03-03	Imantodes cenchoa	Chunk-headed Snake	Reptile	1	Waxing Crescent (31.6% Full)	Dark	Dry	7:30 - 10:30	09:54:00	22:37:00	0
March	2017	2017-03-03	Leptodeira septentrionalis	Northern Cat-eyed Snake	Reptile	1	Waxing Crescent (31.6% Full)	Dark	Dry	7:30 - 10:30	09:54:00	22:37:00	3
March	2017	2017-03-04	Leptodeira septentrionalis	Northern Cat-eyed Snake	Reptile	1	Waxing Crescent (42.7% Full)	Dark	Dry	7:30 - 10:30	10:47:00	23:35:00	0
March	2017	2017-03-04	Leptophis ahaetulla	Giant Parrot Snake	Reptile	1	Waxing Crescent (42.7% Full)	Dark	Dry	7:30 - 10:30	10:47:00	23:35:00	3
March	2017	2017-03-05	Leptodeira septentrionalis	Northern Cat-eyed Snake	Reptile	1	First Quarter (54.1% Full)	Dark	Dry	7:30 - 10:30	11:42:00	-	3
March	2017	2017-03-07	Boa imperator	Boa Constrictor	Reptile	1	Waxing Gibbous (75.5% Full)	Semi-bright	Dry	7:30 - 10:30	13:36:00	01:31:00	3
March	2017	2017-03-07	Leptophis ahaetulla	Giant Parrot Snake	Reptile	1	Waxing Gibbous (75.5% Full)	Semi-bright	Dry	7:30 - 10:30	13:36:00	01:31:00	0
March	2017	2017-03-10	Leptodeira septentrionalis	Northern Cat-eyed Snake	Reptile	2	Waxing Gibbous (96.6% Full)	Bright	Dry	7:30 - 10:30	16:22:00	04:11:00	3
March	2017	2017-03-14	Enuliophis sclateri	Sock-headed Snake	Reptile	1	Waning Gibbous (94.8% Full)	Dark	Dry	7:30 - 10:15	19:38:00	07:10:00	2.75
March	2017	2017-03-16	Leptodeira septentrionalis	Northern Cat-eyed Snake	Reptile	1	Waning Gibbous (83.1% Full)	Dark	Dry	7:30 - 10:30	21:11:00	08:34:00	3
March	2017	2017-03-20	Leptodeira septentrionalis	Northern Cat-eyed Snake	Reptile	1	Last Quarter (48.4% Full)	Dark	Dry	7:30 - 10:45	-	11:32:00	3.25
March	2017	2017-03-23	Mastigodryas melanolomus	Neotropical Racer	Reptile	1	Waning Crescent (20.7% Full)	Dark	Dry	7:30 - 10:15	02:00:00	14:03:00	2.75
March	2017	2017-03-27	Mastigodryas melanolomus	Neotropical Racer	Reptile	1	New Moon (0.1% Full)	Dark	Dry	8:00 - 10:00	05:15:00	17:38:00	2
March	2017	2017-03-30	Enuliophis sclateri	Sock-headed Snake	Reptile	1	Waxing Crescent (10.5% Full)	Dark	Dry	8:00 - 10:00	07:47:00	20:29:00	2
March	2017	2017-03-31	Mastigodryas melanolomus	Neotropical Racer	Reptile	1	Waxing Crescent (18.5% Full)	Dark	Dry	7:30 - 10:15	08:41:00	21:28:00	2.75
March	2017	2017-03-31	Spilotes pullatus	Tiger Rat Snake	Reptile	1	Waxing Crescent (18.5% Full)	Dark	Dry	7:30 - 10:15	08:41:00	21:28:00	0
April	2017	2017-04-05	Leptodeira septentrionalis	Northern Cat-eyed Snake ( neonate )	Reptile	1	Waxing Gibbous (72% Full)	Semi-bright	Dry	7:30 - 10:15	13:24:00	01:17:00	2.75
April	2017	2017-04-10	Mastigodryas melanolomus	Neotropical Racer	Reptile	1	Waxing Gibbous (99.9% Full)	Bright	Dry	7:30 - 10:15	17:33:00	05:06:00	2.75
April	2017	2017-04-11	Enuliophis sclateri	Sock-headed Snake	Reptile	1	Full Moon (99.6% Full)	Semi-bright	Dry	8:00 - 10:00	18:19:00	05:48:00	2
April	2017	2017-04-14	Boa imperator	Boa Constrictor	Reptile	1	Waning Gibbous (88.1% Full)	Dark	Dry	7:30 - 10:15	20:40:00	07:56:00	2.75
April	2017	2017-04-16	Leptodeira septentrionalis	Northern Cat-eyed Snake	Reptile	1	Waning Gibbous (73.5% Full)	Dark	Dry	8:00 - 10:15	22:16:00	09:26:00	2.25
April	2017	2017-04-19	Mastigodryas melanolomus	Neotropical Racer	Reptile	1	Last Quarter (45.8% Full)	Dark	Light Rain	7:30 - 10:15	-	11:53:00	2.75
April	2017	2017-04-23	Leptodeira septentrionalis	Northern Cat-eyed Snake	Reptile	1	Waning Crescent (9.7% Full)	Dark	Dry	7:30 - 10:30	03:02:00	15:21:00	3
April	2017	2017-04-24	Leptodeira septentrionalis	Northern Cat-eyed Snake	Reptile	1	Waning Crescent (3.9% Full)	Dark	Dry	7:30 - 10:15	03:50:00	16:16:00	2.75
April	2017	2017-04-25	Boa imperator	Boa Constrictor	Reptile	1	Waning Crescent (0.6% Full)	Dark	Light Rain	7:30 - 10:15	04:40:00	17:14:00	2.75
April	2017	2017-04-27	Mastigodryas melanolomus	Neotropical Racer	Reptile	1	Waxing Crescent (2.7% Full)	Dark	Dry	7:30 - 10:45	06:27:00	19:13:00	3.25
May	2017	2017-05-06	Boa imperator	Boa Constrictor	Reptile	1	Waxing Gibbous (85.1% Full)	Semi-bright	Rainy	7:30 - 10:30	14:43:00	02:23:00	0
May	2017	2017-05-06	Imantodes cenchoa	Chunk-headed Snake	Reptile	1	Waxing Gibbous (85.1% Full)	Semi-bright	Rainy	7:30 - 10:30	14:43:00	02:23:00	3
May	2017	2017-05-16	Imantodes cenchoa	Chunk-headed Snake	Reptile	1	Waning Gibbous (71% Full)	Dark	Dry	7:30 - 10:30	22:34:00	09:47:00	3
May	2017	2017-05-16	Leptodeira septentrionalis	Northern Cat-eyed Snake	Reptile	1	Waning Gibbous (71% Full)	Dark	Dry	7:30 - 10:30	22:34:00	09:47:00	0
May	2017	2017-05-17	Leptodeira septentrionalis	Northern Cat-eyed Snake	Reptile	1	Waning Gibbous (61.8% Full)	Dark	Dry	7:30 - 10:30	23:21:00	10:36:00	3
May	2017	2017-05-18	Imantodes cenchoa	Chunk-headed Snake	Reptile	1	Last Quarter (51.8% Full)	Dark	Dry	7:30 - 10:30	-	11:26:00	3
May	2017	2017-05-30	Imantodes cenchoa	Chunk-headed Snake	Reptile	1	Waxing Crescent (32.1% Full)	Dark	Light Rain	7:30 - 10:15	10:06:00	22:50:00	2.75
May	2017	2017-05-30	Leptodeira septentrionalis	Northern Cat-eyed Snake	Reptile	1	Waxing Crescent (32.1% Full)	Dark	Light Rain	7:30 - 10:15	10:06:00	22:50:00	0
June	2017	2017-06-01	Imantodes cenchoa	Chunk-headed Snake	Reptile	1	First Quarter (53.3% Full)	Dark	Dry	7:45 - 10:30	11:52:00	-	2.75
June	2017	2017-06-11	Imantodes cenchoa	Chunk-headed Snake	Reptile	1	Waning Gibbous (95.1% Full)	Semi-bright	Dry	8:00 - 10:00	19:45:00	06:55:00	2
June	2017	2017-06-20	Mastigodryas melanolomus	Neotropical Racer	Reptile	1	Waning Crescent (15.3% Full)	Dark	Dry	8:00 - 10:30	01:56:00	14:35:00	2.5
June	2017	2017-06-21	Leptodeira septentrionalis	Northern Cat-eyed Snake	Reptile	1	Waning Crescent (7.7% Full)	Dark	Rainy	7:30 - 10:15	02:49:00	15:35:00	2.75
June	2017	2017-06-22	Imantodes cenchoa	Chunk-headed Snake	Reptile	1	Waning Crescent (2.4% Full)	Dark	Dry	7:30 - 10:30	03:46:00	16:37:00	3
June	2017	2017-06-30	Imantodes cenchoa	Chunk-headed Snake	Reptile	1	First Quarter (48.5% Full)	Dark	Dry	8:00 - 10:00	11:24:00	23:45:00	2
July	2017	2017-07-05	Leptodeira septentrionalis	Northern Cat-eyed Snake	Reptile	1	Waxing Gibbous (90.1% Full)	Bright	Dry	7:30 - 10:15	15:17:00	02:33:00	2.75
July	2017	2017-07-06	Leptodeira septentrionalis	Northern Cat-eyed Snake	Reptile	1	Waxing Gibbous (95.1% Full)	Semi-bright	Light Rain	7:30 - 10:30	16:05:00	03:17:00	3
July	2017	2017-07-06	Mastigodryas melanolomus	Neotropical Racer	Reptile	1	Waxing Gibbous (95.1% Full)	Semi-bright	Light Rain	7:30 - 10:30	16:05:00	03:17:00	0
July	2017	2017-07-10	Leptodeira septentrionalis	Northern Cat-eyed Snake	Reptile	1	Waning Gibbous (97.3% Full)	Semi-bright	Dry	7:30 - 10:30	19:17:00	06:30:00	3
July	2017	2017-07-12	Imantodes cenchoa	Chunk-headed Snake	Reptile	1	Waning Gibbous (87.3% Full)	Dark	Dry	7:30 - 10:30	20:48:00	08:09:00	3
July	2017	2017-07-12	Mastigodryas melanolomus	Neotropical Racer	Reptile	1	Waning Gibbous (87.3% Full)	Dark	Dry	7:30 - 10:30	20:48:00	08:09:00	0
July	2017	2017-07-13	Leptodeira septentrionalis	Northern Cat-eyed Snake	Reptile	1	Waning Gibbous (79.8% Full)	Dark	Dry	7:30 - 10:15	21:33:00	08:59:00	2.75
July	2017	2017-07-24	Leptodeira septentrionalis	Northern Cat-eyed Snake	Reptile	1	Waxing Crescent (2.9% Full)	Dark	Light Rain	7:30 - 10:30	06:33:00	19:18:00	3
July	2017	2017-07-27	Leptodeira septentrionalis	Northern Cat-eyed Snake	Reptile	1	Waxing Crescent (23.3% Full)	Dark	Dry	7:30 - 10:30	09:15:00	21:40:00	3
July	2017	2017-07-29	Imantodes cenchoa	Chunk-headed Snake	Reptile	1	Waxing Crescent (42.2% Full)	Dark	Light Rain	7:30 - 10:15	10:52:00	23:05:00	2.75
July	2017	2017-07-31	Leptodeira septentrionalis	Northern Cat-eyed Snake	Reptile	1	Waxing Gibbous (61.5% Full)	Semi-bright	Dry	7:30 - 10:30	12:26:00	-	3
August	2017	2017-08-03	Leptodeira septentrionalis	Northern Cat-eyed Snake	Reptile	1	Waxing Gibbous (85.9% Full)	Semi-bright	Dry	7:30 - 10:30	14:48:00	01:59:00	3
August	2017	2017-08-06	Mastigodryas melanolomus	Neotropical Racer	Reptile	1	Waxing Gibbous (99.2% Full)	Semi-bright	Rainy	7:30 - 10:30	17:13:00	04:25:00	3
August	2017	2017-08-07	Leptodeira septentrionalis	Northern Cat-eyed Snake	Reptile	2	Full Moon (100% Full)	Semi-bright	Dry	7:30 - 10:15	18:00:00	05:15:00	2.75
August	2017	2017-08-13	Leptodeira septentrionalis	Northern Cat-eyed Snake	Reptile	1	Waning Gibbous (63.5% Full)	Dark	Dry	7:30 - 10:30	22:36:00	10:20:00	3
August	2017	2017-08-13	Mastigodryas melanolomus	Neotropical Racer	Reptile	1	Waning Gibbous (63.5% Full)	Dark	Dry	7:30 - 10:30	22:36:00	10:20:00	0
August	2017	2017-08-18	Clelia clelia	Mussurana	Reptile	1	Waning Crescent (11.4% Full)	Dark	Dry	7:30 - 10:30	02:16:00	15:10:00	3
August	2017	2017-08-18	Imantodes cenchoa	Chunk-headed Snake	Reptile	1	Waning Crescent (11.4% Full)	Dark	Dry	7:30 - 10:30	02:16:00	15:10:00	0
August	2017	2017-08-21	Mastigodryas melanolomus	Neotropical Racer	Reptile	1	New Moon (0% Full)	Dark	Dry	7:30 - 10:30	05:14:00	17:56:00	3
August	2017	2017-08-22	Leptodeira septentrionalis	Northern Cat-eyed Snake	Reptile	1	Waxing Crescent (1.5% Full)	Dark	Dry	7:30 - 10:30	06:10:00	18:45:00	3
August	2017	2017-08-22	Mastigodryas melanolomus	Neotropical Racer	Reptile	1	Waxing Crescent (1.5% Full)	Dark	Dry	7:30 - 10:30	06:10:00	18:45:00	0
November	2017	2017-11-01	Imantodes cenchoa	Chunk-headed Snake	Reptile	1	Waxing Gibbous (92.5% Full)	Bright	Dry	7:30 - 10:30	15:27:00	03:00:00	3
November	2017	2017-11-10	Rhadinella godmani	Yellow-bellied Litter Snake	Reptile	1	Last Quarter (50.5% Full)	Dark	Dry	7:30 - 10:15	23:49:00	11:40:00	2.75
November	2017	2017-11-17	Phrynonax poecilonotus	Neotropical Birdsnake	Reptile	1	Waning Crescent (1% Full)	Dark	Dry	7:00 - 9:00	04:46:00	16:53:00	2
November	2017	2017-11-19	Imantodes cenchoa	Chunk-headed Snake	Reptile	1	Waxing Crescent (1.7% Full)	Dark	Dry	7:30 - 10:30	06:22:00	18:22:00	3
November	2017	2017-11-20	Imantodes cenchoa	Chunk-headed Snake	Reptile	1	Waxing Crescent (5% Full)	Dark	Dry	7:30 - 10:30	07:11:00	19:08:00	3
November	2017	2017-11-21	Imantodes cenchoa	Chunk-headed Snake	Reptile	1	Waxing Crescent (9.9% Full)	Dark	Light Rain	7:30 - 10:30	07:59:00	19:56:00	3
November	2017	2017-11-22	Imantodes cenchoa	Chunk-headed Snake	Reptile	1	Waxing Crescent (16.2% Full)	Dark	Dry	7:30 - 10:30	08:47:00	20:44:00	3
December	2017	2017-12-05	Imantodes cenchoa	Chunk-headed Snake	Reptile	1	Waning Gibbous (93% Full)	Semi-bright	Dry	7:30 - 10:30	19:39:00	07:33:00	3
December	2017	2017-12-08	Imantodes cenchoa	Chunk-headed Snake	Reptile	1	Waning Gibbous (66.1% Full)	Dark	Dry	7:30 - 10:30	22:37:00	10:26:00	0
December	2017	2017-12-08	Leptodeira septentrionalis	Northern Cat-eyed Snake	Reptile	1	Waning Gibbous (66.1% Full)	Dark	Dry	7:30 - 10:30	22:37:00	10:26:00	3
December	2017	2017-12-11	Bothrops asper	Fer-de-lance	Reptile	1	Waning Crescent (35% Full)	Dark	Dry	6:00 - 8:00	00:20:00	12:45:00	2
December	2017	2017-12-12	Leptodeira septentrionalis	Northern Cat-eyed Snake	Reptile	1	Waning Crescent (25.4% Full)	Dark	Dry	7:30 - 10:45	01:09:00	13:27:00	3.25
December	2017	2017-12-15	Leptodeira septentrionalis	Northern Cat-eyed Snake	Reptile	1	Waning Crescent (5.3% Full)	Dark	Dry	7:30 - 10:30	03:31:00	15:35:00	3
December	2017	2017-12-17	Ninia maculata	Banded Coffee Snake	Reptile	1	Waning Crescent (0.1% Full)	Dark	Dry	7:30 - 10:30	05:07:00	17:05:00	3
December	2017	2017-12-23	Imantodes cenchoa	Chunk-headed Snake	Reptile	1	Waxing Crescent (25.7% Full)	Dark	Dry	7:30 - 10:15	09:45:00	21:52:00	2.75
December	2017	2017-12-24	Imantodes cenchoa	Chunk-headed Snake	Reptile	1	Waxing Crescent (34.9% Full)	Dark	Dry	8:00 - 10:00	10:28:00	22:40:00	2
December	2017	2017-12-26	Enuliophis sclateri	Sock-headed Snake	Reptile	1	First Quarter (55.1% Full)	Dark	Dry	7:30 - 10:30	11:55:00	-	5.75
December	2017	2017-12-27	Leptodeira septentrionalis	Northern Cat-eyed Snake	Reptile	1	Waxing Gibbous (64.7% Full)	Dark	Dry	5:30 - 7:50	12:40:00	00:19:00	2.5
December	2017	2017-12-27	Enuliophis sclateri	Sock-headed Snake	Reptile	1	Waxing Gibbous (65.7% Full)	Dark	Dry	7:30 - 10:30	12:40:00	00:19:00	3
December	2017	2017-12-28	Micrurus alleni	Allen's Coral Snake	Reptile	1	Waxing Gibbous (75% Full)	Semi-bright	Dry	6:00 - 8:00	13:28:00	01:11:00	4
December	2017	2017-12-30	Leptodeira septentrionalis	Northern Cat-eyed Snake	Reptile	1	Waxing Gibbous (92.4% Full)	Semi-bright	Dry	7:30 - 10:30	15:15:00	15:05:00	5

## Sheet: Sheet4
Sum of Number Spotted	Column Labels
Row Labels	January	February	March	April	May	June	July	August	September	October	November	December	(blank)	Grand Total
2012	1													1
Imantodes cenchoa	1													1
2013	37	30	30	27	19	14	34	8	15	5	29	27		275
Enuliophis sclateri	2	2	2	2	3	2	5	1			1	6		26
Imantodes cenchoa	7	6	8	5	5	2	4		1		3	6		47
Leptodeira septentrionalis	20	21	18	19	9	10	23	7	13	5	22	14		181
Mastigodryas melanolomus	7	1	1				2							11
Siphlophis compressus	1		1	1	2				1		3	1		10
2014	20	25	15	28	11	20	9	28	20	12	25	32		245
Enuliophis sclateri		5	1			3		3	2	3	1	4		22
Imantodes cenchoa	8	5	2	7	3	5	1	7	3	2	6	10		59
Leptodeira septentrionalis	9	14	11	19	7	10	6	16	11	6	15	16		140
Mastigodryas melanolomus	2	1		1		1	1		2		3			11
Siphlophis compressus	1		1	1	1	1	1	2	2	1		2		13
2015	34	24	37	26	24	10	14	20	14		15	19		237
Enuliophis sclateri	3	1		3	2	1	1	1	2		3	3		20
Imantodes cenchoa	13	5	10	6	6	3	6	9	2			6		66
Leptodeira septentrionalis	16	16	23	12	16	6	6	7	8		10	8		128
Mastigodryas melanolomus	2		1	3				1	2		1	2		12
Siphlophis compressus		2	3	2			1	2			1			11
2016	12	15	18	19		14	11	9	3		6	4		111
Enuliophis sclateri	3	3	3	2		1	2	1						15
Imantodes cenchoa	2	2	3	9		3	1	2	1		2	3		28
Leptodeira septentrionalis	7	8	11	6		9	7	6	2		3	1		60
Mastigodryas melanolomus				2		1	1				1			5
Siphlophis compressus		2	1											3
2017	12	13	14	8	7	6	11	10			5	11		97
Enuliophis sclateri			2	1								2		5
Imantodes cenchoa	1	2	1		4	4	2	1			5	4		24
Leptodeira septentrionalis	11	11	8	4	3	1	7	5				5		55
Mastigodryas melanolomus			3	3		1	2	4						13
(blank)
(blank)
Grand Total	116	107	114	108	61	64	79	75	52	17	80	93		966

## Sheet: 5+comunes
Month	Year	Date	Species	Common Name	Type	Number Spotted	Moon Phase	Light Conditions	Weather Conditions	Time	Moonrise	Moonset	Field Hours
January	2012	2012-01-02	Imantodes cenchoa	Chunk-headed Snake	Reptile	1	Waxing Gibbous (63.8% Full)	Semi-bright	Dry	8:00 - 10:00	No Record	No Record	0
January	2013	2013-01-01	Mastigodryas melanolomus	Neotropical Racer	Reptile	1	Waning Gibbous (85.5% Full)	Dark	Light Rain	7:45 - 10:00	21:04:00	No Record	2.25
January	2013	2013-01-02	Imantodes cenchoa	Chunk-headed Snake	Reptile	1	Waning Gibbous (72.1% Full)	Dark	Rainy	7:30 - 10:15	21:52:00	No Record	2.75
January	2013	2013-01-03	Mastigodryas melanolomus	Neotropical Racer	Reptile	1	Waning Gibbous (68.1% Full)	Dark	Dry	6:00 - 10:00	22:43:00	No Record	2
January	2013	2013-01-03	Mastigodryas melanolomus	Neonate Neotropical Racer	Reptile	1	Waning Gibbous (68.1% Full)	Dark	Dry	8:00 - 10:00	22:43:00	No Record	2
January	2013	2013-01-03	Mastigodryas melanolomus	Neotropical Racer	Reptile	1	Waning Gibbous (68.1% Full)	Dark	Dry	8:00 - 10:00	22:43:00	No Record	0
January	2013	2013-01-04	Leptodeira septentrionalis	Northern Cat-eyed Snake	Reptile	1	Last Quarter (58.3% Full)	Dark	Dry	8:00 - 10:00	23:35:00	No Record	2
January	2013	2013-01-05	Leptodeira septentrionalis	Northern Cat-eyed Snake	Reptile	2	Waning Crescent (47.3% Full)	Dark	Dry	6:00 - 8:00	-	No Record	2
January	2013	2013-01-05	Leptodeira septentrionalis	Northern Cat-eyed Snake	Reptile	2	Waning Crescent (47.3% Full)	Dark	Dry	7:30 - 10:00	-	No Record	0
January	2013	2013-01-06	Imantodes cenchoa	Chunk-headed Snake	Reptile	1	Waning Crescent (36% Full)	Dark	Dry	7:30 - 10:30	00:29:00	No Record	3
January	2013	2013-01-06	Leptodeira septentrionalis	Northern Cat-eyed Snake	Reptile	2	Waning Crescent (36% Full)	Dark	Dry	7:30 - 10:30	00:29:00	No Record	0
January	2013	2013-01-10	Leptodeira septentrionalis	Northern Cat-eyed Snake	Reptile	1	Waning Crescent (2.8% Full)	Dark	Dry	7:30 - 10:00	04:33:00	No Record	2.5
January	2013	2013-01-10	Leptodeira septentrionalis	Northern Cat-eyed Snake	Reptile	1	Waning Crescent (2.8% Full)	Dark	Dry	7:30 - 10:00	04:33:00	No Record	0
January	2013	2013-01-11	Leptodeira septentrionalis	Northern Cat-eyed Snake	Reptile	2	New Moon (0.2% Full)	Dark	Dry	7:30 - 10:00	05:33:00	No Record	2.5
January	2013	2013-01-12	Leptodeira septentrionalis	Northern Cat-eyed Snake	Reptile	1	Waxing Crescent (0.5% Full)	Dark	Dry	7:30 - 10:00	06:29:00	No Record	2.5
January	2013	2013-01-13	Enuliophis sclateri	Sock-headed Snake	Reptile	1	Waxing Crescent (3.7% Full)	Dark	Dry	5:45 - 7:45	07:21:00	No Record	2
January	2013	2013-01-13	Leptodeira septentrionalis	Northern Cat-eyed Snake	Reptile	1	Waxing Crescent (3.7% Full)	Dark	Dry	7:30 - 10:15	07:21:00	No Record	2.75
January	2013	2013-01-14	Enuliophis sclateri	Sock-headed Snake	Reptile	1	Waxing Crescent (9.0% Full)	Dark	Dry	7:44 - 9:20	08:10:00	No Record	0
January	2013	2013-01-14	Imantodes cenchoa	Chunk-headed Snake	Reptile	1	Waxing Crescent (9.0% Full)	Dark	Dry	7:44 - 9:20	08:10:00	No Record	0
January	2013	2013-01-15	Imantodes cenchoa	Chunk-headed Snake	Reptile	1	Waxing Crescent (16.5% Full)	Dark	Dry	7:30 -10:30	08:56:00	No Record	3
January	2013	2013-01-15	Leptodeira septentrionalis	Northern Cat-eyed Snake	Reptile	1	Waxing Crescent (16.5% Full)	Dark	Dry	7:30 -10:30	08:56:00	No Record	0
January	2013	2013-01-15	Siphlophis compressus	Red-eyed Tree Snake	Reptile	1	Waxing Crescent (16.5% Full)	Dark	Dry	7:30 -10:30	08:56:00	No Record	0
January	2013	2013-01-16	Leptodeira septentrionalis	Northern Cat-eyed Snake	Reptile	1	Waxing Crescent (24.9% Full)	Dark	Light Rain	7:30 -10:00	09:40:00	No Record	2.5
January	2013	2013-01-17	Mastigodryas melanolomus	Neotropical Racer	Reptile	1	Waxing Crescent (34.4% Full)	Dark	Dry	7:30 -10:00	10:22:00	No Record	2.5
January	2013	2013-01-18	Leptodeira septentrionalis	Northern Cat-eyed Snake	Reptile	1	First Quarter (44.0% Full)	Dark	Dry	7:30 -10:00	11:05:00	No Record	2.5
January	2013	2013-01-18	Mastigodryas melanolomus	Neotropical Racer	Reptile	1	First Quarter (44.0% Full)	Dark	Dry	7:30 -10:00	11:05:00	No Record	0
January	2013	2013-01-24	Imantodes cenchoa	Chunk-headed Snake	Reptile	1	Waxing Gibbous (94.6% Full)	Bright	Dry	8:00 - 10:00	15:43:00	No Record	0
January	2013	2013-01-24	Leptodeira septentrionalis	Northern Cat-eyed Snake	Reptile	1	Waxing Gibbous (94.6% Full)	Bright	Dry	8:00 - 10:00	15:43:00	No Record	2
January	2013	2013-01-26	Imantodes cenchoa	Chunk-headed Snake	Reptile	1	Waxing Gibbous (99.6% Full)	Bright	Dry	7:30 - 10:15	17:22:00	No Record	0
January	2013	2013-01-26	Leptodeira septentrionalis	Northern Cat-eyed Snake	Reptile	1	Waxing Gibbous (99.6% Full)	Bright	Dry	7:30 - 10:15	17:22:00	No Record	2.75
January	2013	2013-01-27	Leptodeira septentrionalis	Northern Cat-eyed Snake	Reptile	1	Full Moon (100% Full)	Bright	Dry	6:00 - 8:00	18:12:00	No Record	2
January	2013	2013-01-30	Imantodes cenchoa	Chunk-headed Snake	Reptile	1	Waning Gibbous (89.7% Full)	Dark	Dry	8:00 - 10:00	20:40:00	No Record	2
January	2013	2013-01-30	Leptodeira septentrionalis	Northern Cat-eyed Snake	Reptile	1	Waning Gibbous (89.7% Full)	Dark	Dry	8:00 - 10:15	20:40:00	No Record	2.25
January	2013	2013-01-31	Mastigodryas melanolomus	Neotropical Racer	Reptile	1	Waning Gibbous (82.1% Full)	Dark	Dry	7:30 - 10:00	21:31:00	No Record	2.5
February	2013	2013-02-02	Imantodes cenchoa	Chunk-headed Snake	Reptile	1	Waning Gibbous (62.6% Full)	Dark	Dry	7:30 - 10:15	23:20:00	No Record	2.25
February	2013	2013-02-02	Imantodes cenchoa	Juvenile Chunk-headed Snake	Reptile	1	Waning Gibbous (62.6% Full)	Dark	Dry	7:30 - 10:15	23:20:00	No Record	0
February	2013	2013-02-02	Leptodeira septentrionalis	Juvenile Northern Cat-eyed Snake	Reptile	1	Waning Gibbous (62.6% Full)	Dark	Dry	7:30 - 10:15	23:20:00	No Record	0
February	2013	2013-02-03	Leptodeira septentrionalis	Northern Cat-eyed Snake	Reptile	1	Last Quarter (51.6% Full)	Dark	Dry	8:00 - 10:00	-	No Record	2
February	2013	2013-02-03	Leptodeira septentrionalis	Juvenile Northern Cat-eyed Snake	Reptile	1	Last Quarter (51.6% Full)	Dark	Dry	8:00 - 10:00	-	No Record	0
February	2013	2013-02-04	Enuliophis sclateri	Sock-headed Snake	Reptile	1	Waning Crescent (40.6% Full)	Dark	Dry	8:00 - 10:15	00:18:00	No Record	2.25
February	2013	2013-02-04	Leptodeira septentrionalis	Northern Cat-eyed Snake	Reptile	1	Waning Crescent (40.6% Full)	Dark	Dry	8:00 - 10:15	00:18:00	No Record	0
February	2013	2013-02-05	Leptodeira septentrionalis	Northern Cat-eyed Snake	Reptile	1	Waning Crescent (29.8% Full)	Dark	Dry	7:30 - 10:00	01:17:00	No Record	2.5
February	2013	2013-02-06	Leptodeira septentrionalis	Northern Cat-eyed Snake	Reptile	2	Waning Crescent (19.5% Full)	Dark	Dry	7:30 - 10:00	02:17:00	No Record	2.5
February	2013	2013-02-10	Imantodes cenchoa	Chunk-headed Snake	Reptile	1	New Moon (0.0% Full)	Dark	Dry	7:30 - 10:30	05:57:00	No Record	3
February	2013	2013-02-10	Leptodeira septentrionalis	Northern Cat-eyed Snake	Reptile	1	New Moon (0.0% Full)	Dark	Dry	7:30 - 10:30	05:57:00	No Record	0
February	2013	2013-02-11	Leptodeira septentrionalis	Northern Cat-eyed Snake	Reptile	2	Waxing Crescent (0.7% Full)	Dark	Dry	7:30 - 11:00	06:45:00	No Record	2.5
February	2013	2013-02-12	Leptodeira septentrionalis	Northern Cat-eyed Snake	Reptile	1	Waxing Crescent (5.6% Full)	Dark	Dry	7:30 - 10:30	07:30:00	No Record	3
February	2013	2013-02-13	Leptodeira septentrionalis	Northern Cat-eyed Snake	Reptile	1	Waxing Crescent (15.9% Full)	Dark	Dry	7:30 - 10:20	08:14:00	No Record	3
February	2013	2013-02-19	Enuliophis sclateri	Sock-headed Snake	Reptile	1	Waxing Gibbous (69.9% Full)	Semi-bright	Dry	7:30 - 10:00	12:47:00	No Record	2.5
February	2013	2013-02-20	Mastigodryas melanolomus	Neotropical Racer	Reptile	1	Waxing Gibbous (73.2% Full)	Semi-bright	Dry	7:30 - 10:00	13:36:00	No Record	2.5
February	2013	2013-02-21	Imantodes cenchoa	Chunk-headed Snake	Reptile	1	Waxing Gibbous (81.2% Full)	Bright	Dry	7:30 - 10:15	14:25:00	No Record	2.75
February	2013	2013-02-21	Leptodeira septentrionalis	Northern Cat-eyed Snake	Reptile	1	Waxing Gibbous (81.2% Full)	Bright	Dry	7:30 - 10:15	14:25:00	No Record	0
February	2013	2013-02-22	Imantodes cenchoa	Chunk-headed Snake	Reptile	1	Waxing Gibbous (90.8% Full)	Bright	Dry	7:30 - 10:00	15:15:00	No Record	2.5
February	2013	2013-02-22	Leptodeira septentrionalis	Northern Cat-eyed Snake	Reptile	2	Waxing Gibbous (90.8% Full)	Bright	Dry	7:30 - 10:00	15:15:00	No Record	0
February	2013	2013-02-23	Leptodeira septentrionalis	Northern Cat-eyed Snake	Reptile	1	Waxing Gibbous (95.6% Full)	Bright	Dry	6:00 - 8:00	16:04:00	No Record	2
February	2013	2013-02-26	Leptodeira septentrionalis	Northern Cat-eyed Snake	Reptile	1	Waning Gibbous (98.8% Full)	Semi-bright	Dry	8:00 - 10:00	18:35:00	No Record	2
February	2013	2013-02-26	Leptodeira septentrionalis	Northern Cat-eyed Snake	Reptile	1	Waning Gibbous (98.8% Full)	Semi-bright	Dry	8:00 - 10:00	18:35:00	No Record	0
February	2013	2013-02-27	Imantodes cenchoa	Chunk-headed Snake	Reptile	1	Waning Gibbous (95.5% Full)	Dark	Dry	7:30 - 10:30	19:27:00	No Record	0
February	2013	2013-02-27	Leptodeira septentrionalis	Northern Cat-eyed Snake	Reptile	2	Waning Gibbous (95.5% Full)	Dark	Dry	7:30 - 10:30	19:27:00	No Record	3
February	2013	2013-02-28	Leptodeira septentrionalis	Northern Cat-eyed Snake	Reptile	1	Waning Gibbous (89.7% Full)	Dark	Dry	7:30 - 10:00	20:20:00	No Record	2.5
March	2013	2013-03-01	Imantodes cenchoa	Chunk-headed Snake	Reptile	1	Waning Gibbous (82.1% Full)	Dark	Rainy	7:30 - 10:15	21:15:00	No Record	0
March	2013	2013-03-01	Leptodeira septentrionalis	Northern Cat-eyed Snake	Reptile	1	Waning Gibbous (82.1% Full)	Dark	Rainy	7:30 - 10:15	21:15:00	No Record	0
March	2013	2013-03-01	Leptodeira septentrionalis	Northern Cat-eyed Snake	Reptile	1	Waning Gibbous (82.1% Full)	Dark	Rainy	7:30 - 10:15	21:15:00	No Record	2.75
March	2013	2013-03-02	Enuliophis sclateri	Sock-headed Snake	Reptile	1	Waning Gibbous (72.5% Full)	Dark	Dry	7:30 - 10:15	22:12:00	No Record	2.75
March	2013	2013-03-02	Imantodes cenchoa	Chunk-headed Snake	Reptile	1	Waning Gibbous (72.5% Full)	Dark	Dry	7:30 - 10:15	22:12:00	No Record	0
March	2013	2013-03-02	Leptodeira septentrionalis	Northern Cat-eyed Snake	Reptile	1	Waning Gibbous (72.5% Full)	Dark	Dry	7:30 - 10:15	22:12:00	No Record	0
March	2013	2013-03-03	Leptodeira septentrionalis	Northern Cat-eyed Snake	Reptile	1	Waning Gibbous (62.0% Full)	Dark	Dry	7:30 - 10:15	23:11:00	No Record	2.75
March	2013	2013-03-05	Leptodeira septentrionalis	Northern Cat-eyed Snake	Reptile	1	Waning Crescent (39% Full)	Dark	Dry	7:45 - 10:00	00:10:00	No Record	2.25
March	2013	2013-03-06	Leptodeira septentrionalis	Northern Cat-eyed Snake	Reptile	1	Waning Crescent (28.4% Full)	Dark	Dry	7:30 - 10:15	01:08:00	No Record	2.75
March	2013	2013-03-08	Imantodes cenchoa	Chunk-headed Snake	Reptile	1	Waning Crescent (10.6% Full)	Dark	Dry	7:30 - 10:15	02:58:00	No Record	0
March	2013	2013-03-09	Leptodeira septentrionalis	Northern Cat-eyed Snake	Reptile	1	Waning Crescent (4.7% Full)	Dark	Dry	7:30 - 10:15	03:48:00	No Record	2.75
March	2013	2013-03-10	Leptodeira septentrionalis	Northern Cat-eyed Snake	Reptile	2	Waning Crescent (1.2% Full)	Dark	Dry	7:30 - 10:15	04:36:00	No Record	0
March	2013	2013-03-10	Mastigodryas melanolomus	Neotropical Racer	Reptile	1	Waning Crescent (1.2% Full)	Dark	Dry	7:30 - 10:15	04:36:00	No Record	0
March	2013	2013-03-11	Leptodeira septentrionalis	Northern Cat-eyed Snake	Reptile	1	New Moon (0.0% Full)	Dark	Dry	7:30 - 10:30	05:21:00	No Record	3
March	2013	2013-03-13	Imantodes cenchoa	Chunk-headed Snake Feeding	Reptile	1	Waxing Crescent (4.6% Full)	Dark	Dry	7:30 - 10:30	06:50:00	No Record	3
March	2013	2013-03-13	Leptodeira septentrionalis	Northern Cat-eyed Snake	Reptile	1	Waxing Crescent (4.6% Full)	Dark	Dry	7:30 - 10:30	06:50:00	No Record	0
March	2013	2013-03-15	Leptodeira septentrionalis	Northern Cat-eyed Snake	Reptile	1	Waxing Crescent (16.5% Full)	Dark	Dry	8:00 - 10:00	08:20:00	No Record	2
March	2013	2013-03-18	Leptodeira septentrionalis	Northern Cat-eyed Snake	Reptile	1	Waxing Crescent (41.8% Full)	Dark	Dry	7:30 - 10:30	10:40:00	No Record	3
March	2013	2013-03-18	Siphlophis compressus	Red-eyed Tree Snake	Reptile	1	Waxing Crescent (41.8% Full)	Dark	Dry	7:30 - 10:30	10:40:00	No Record	0
March	2013	2013-03-19	Leptodeira septentrionalis	Northern Cat-eyed Snake	Reptile	2	First Quarter (51.2% Full)	Dark	Dry	7:30 - 10:00	11:28:00	No Record	2.5
March	2013	2013-03-22	Enuliophis sclateri	Sock-headed Snake	Reptile	1	Waxing Gibbous (78.6% Full)	Dark	Dry	8:00 - 10:00	13:55:00	No Record	0
March	2013	2013-03-22	Leptodeira septentrionalis	Northern Cat-eyed Snake	Reptile	1	Waxing Gibbous (78.6% Full)	Dark	Dry	8:00 - 10:00	13:55:00	No Record	2
March	2013	2013-03-26	Imantodes cenchoa	Chunk-headed Snake	Reptile	1	Waxing Gibbous (99.6% Full)	Semi-bright	Light Rain	7:30 - 10:00	17:17:00	No Record	2.5
March	2013	2013-03-27	Imantodes cenchoa	Chunk-headed Snake	Reptile	1	Full Moon (99.8% Full)	Bright	Dry	8:00 - 10:00	18:11:00	No Record	2
March	2013	2013-03-29	Leptodeira septentrionalis	Northern Cat-eyed Snake	Reptile	1	Waning Gibbous (92.3 % Full)	Dark	Dry	7:30 - 10:15	20:05:00	No Record	2.75
March	2013	2013-03-30	Imantodes cenchoa	Chunk-headed Snake	Reptile	1	Waning Gibbous (84.7% Full)	Dark	Dry	8:00 - 10:00	21:04:00	No Record	2
March	2013	2013-03-31	Imantodes cenchoa	Chunk-headed Snake	Reptile	1	Waning Gibbous (76.5% Full)	Dark	Dry	5:30 - 7:45	22:04:00	No Record	2.25
March	2013	2013-03-31	Leptodeira septentrionalis	Northern Cat-eyed Snake	Reptile	1	Waning Gibbous (75.7% Full)	Dark	Dry	7:30 - 10:00	22:04:00	No Record	2.5
April	2013	2013-04-02	Leptodeira septentrionalis	Northern Cat-eyed Snake	Reptile	1	First Quarter (54.6% Full)	Dark	Light Rain	6:00 - 8:00	23:59:00	No Record	2
April	2013	2013-04-02	Leptodeira septentrionalis	Northern Cat-eyed Snake	Reptile	1	First Quarter (53.9% Full)	Dark	Dry	7:30 - 10:00	23:59:00	No Record	2.5
April	2013	2013-04-04	Enuliophis sclateri	Sock-headed Snake	Reptile	1	Waning Crescent (31.7%Full)	Dark	Dry	7:30 - 10:15	00:54:00	No Record	2.75
April	2013	2013-04-04	Leptodeira septentrionalis	Northern Cat-eyed Snake	Reptile	2	Waning Crescent (31.7%Full)	Dark	Dry	7:30 - 10:15	00:54:00	No Record	0
April	2013	2013-04-07	Leptodeira septentrionalis	Northern Cat-eyed Snake	Reptile	4	Waning Crescent (7%Full)	Dark	Dry	6:00 - 8:00	03:17:00	No Record	2
April	2013	2013-04-09	Imantodes cenchoa	Chunk-headed Snake	Reptile	1	Waning Crescent (0.3%Full)	Dark	Dry	8:00 - 10:00	04:45:00	No Record	2
April	2013	2013-04-09	Leptodeira septentrionalis	Northern Cat-eyed Snake	Reptile	1	Waning Crescent (0.3%Full)	Dark	Dry	8:00 - 10:00	04:45:00	No Record	0
April	2013	2013-04-10	Leptodeira septentrionalis	Northern Cat-eyed Snake	Reptile	1	New Moon (0.2% Full)	Dark	Dry	7:30 - 10:15	05:29:00	No Record	2.75
April	2013	2013-04-14	Enuliophis sclateri	Sock-headed Snake	Reptile	1	Waxing Crescent (17.8% Full)	Dark	Dry	7:30 - 10:45	08:33:00	No Record	3.25
April	2013	2013-04-14	Imantodes cenchoa	Chunk-headed Snake	Reptile	1	Waxing Crescent (17.8% Full)	Dark	Dry	7:30 - 10:45	08:33:00	No Record	0
April	2013	2013-04-14	Leptodeira septentrionalis	Northern Cat-eyed Snake	Reptile	1	Waxing Crescent (17.8% Full)	Dark	Dry	7:30 - 10:45	08:33:00	No Record	0
April	2013	2013-04-15	Imantodes cenchoa	Chunk-headed Snake	Reptile	1	Waxing Crescent (25.7% Full)	Dark	Light Rain	7:30 - 10:15	09:21:00	No Record	2.75
April	2013	2013-04-15	Leptodeira septentrionalis	Northern Cat-eyed Snake	Reptile	1	Waxing Crescent (25.7% Full)	Dark	Light Rain	7:30 - 10:15	09:21:00	No Record	0
April	2013	2013-04-16	Leptodeira septentrionalis	Northern Cat-eyed Snake	Reptile	3	Waxing Crescent (34.1% Full)	Dark	Dry	7:30 - 10:30	10:09:00	No Record	3
April	2013	2013-04-16	Leptodeira septentrionalis	Northern Cat-eyed Snake	Reptile	1	Waxing Crescent (34.1% Full)	Dark	Dry	7:30 - 10:30	10:09:00	No Record	0
April	2013	2013-04-18	Imantodes cenchoa	Chunk-headed Snake	Reptile	1	First Quarter (53.4% Full)	Dark	Dry	8:00 - 10:00	11:46:00	No Record	2
April	2013	2013-04-21	Imantodes cenchoa	Chunk-headed Snake	Reptile	1	Waxing Gibbous (81.1% Full)	Dark	Dry	7:30 - 10:30	14:12:00	No Record	0
April	2013	2013-04-21	Leptodeira septentrionalis	Northern Cat-eyed Snake	Reptile	1	Waxing Gibbous (81.1% Full)	Dark	Dry	7:30 - 10:30	14:12:00	No Record	3
April	2013	2013-04-21	Siphlophis compressus	Red-eyed Tree Snake	Reptile	1	Waxing Gibbous (81.1% Full)	Dark	Dry	7:30 - 10:30	14:12:00	No Record	0
April	2013	2013-04-23	Leptodeira septentrionalis	Northern Cat-eyed Snake	Reptile	1	Waxing Gibbous (94.7% Full)	Bright	Dry	7:30 - 10:30	15:56:00	No Record	3
April	2013	2013-04-25	Leptodeira septentrionalis	Northern Cat-eyed Snake	Reptile	1	Full Moon (100% Full)	Semi-bright	Dry	7:30 - 10:30	17:50:00	No Record	3
May	2013	2013-05-06	Enuliophis sclateri	Sock-headed Snake	Reptile	1	Waning Crescent (9.6% Full)	Dark	Dry	7:30 - 10:30	02:43:00	No Record	0
May	2013	2013-05-06	Enuliophis sclateri	Sock-headed Snake	Reptile	1	Waning Crescent (9.6% Full)	Dark	Dry	7:30 - 10:30	02:43:00	No Record	0
May	2013	2013-05-06	Imantodes cenchoa	Chunk-headed Snake	Reptile	1	Waning Crescent (9.6% Full)	Dark	Dry	7:30 - 10:30	02:43:00	No Record	0
May	2013	2013-05-06	Leptodeira septentrionalis	Northern Cat-eyed Snake	Reptile	1	Waning Crescent (9.6% Full)	Dark	Dry	7:30 - 10:30	02:43:00	No Record	3
May	2013	2013-05-06	Siphlophis compressus	Red-eyed Tree Snake	Reptile	1	Waning Crescent (9.6% Full)	Dark	Dry	7:30 - 10:30	02:43:00	No Record	0
May	2013	2013-05-13	Imantodes cenchoa	Chunk-headed Snake	Reptile	1	Waxing Crescent (12.9% Full)	Dark	Light Rain	7:30 - 10:30	08:04:00	No Record	3
May	2013	2013-05-13	Imantodes cenchoa	Chunk-headed Snake	Reptile	1	Waxing Crescent (12.9% Full)	Dark	Light Rain	7:30 - 10:30	08:04:00	No Record	0
May	2013	2013-05-13	Leptodeira septentrionalis	Northern Cat-eyed Snake	Reptile	1	Waxing Crescent (12.9% Full)	Dark	Light Rain	7:30 - 10:30	08:04:00	No Record	0
May	2013	2013-05-16	Leptodeira septentrionalis	Northern Cat-eyed Snake	Reptile	1	Waxing Crescent (36.9% Full)	Dark	Dry	7:30 - 10:30	10:27:00	No Record	3
May	2013	2013-05-17	Leptodeira septentrionalis	Northern Cat-eyed Snake	Reptile	1	First Quarter (46.7% Full)	Dark	Dry	7:30 - 10:30	11:15:00	No Record	3
May	2013	2013-05-18	Enuliophis sclateri	Sock-headed Snake	Reptile	1	Waxing Gibbous (56.5% Full)	Dark	Dry	7:30 - 10:30	12:03:00	No Record	0
May	2013	2013-05-18	Imantodes cenchoa	Chunk-headed Snake	Reptile	1	Waxing Gibbous (56.5% Full)	Dark	Dry	7:30 - 10:30	12:03:00	No Record	3
May	2013	2013-05-22	Siphlophis compressus	Red-eyed Tree Snake	Reptile	1	Waxing Gibbous (92.3% Full)	Dark	Light Rain	7:45 - 10:00	15:32:00	No Record	0
May	2013	2013-05-24	Leptodeira septentrionalis	Northern Cat-eyed Snake	Reptile	1	Full Moon (99.8% Full)	Semi-bright	Dry	8:00 - 10:15	17:34:00	No Record	0
May	2013	2013-05-25	Leptodeira septentrionalis	Northern Cat-eyed Snake	Reptile	2	Waning Gibous (99.3% Full)	Bright	Dry	8:00 - 10:15	18:37:00	No Record	2.25
May	2013	2013-05-31	Imantodes cenchoa	Chunk-headed Snake	Reptile	1	Last Quarter (49.1% Full)	Dark	Dry	8:00 - 10:00	23:59:00	No Record	0
May	2013	2013-05-31	Leptodeira septentrionalis	Northern Cat-eyed Snake	Reptile	2	Last Quarter (49.1% Full)	Dark	Dry	8:00 - 10:00	23:59:00	No Record	2
June	2013	2013-06-01	Leptodeira septentrionalis	Leptodeira septentrionalis	Reptile	1	Waning Crescent (38.8% Full)	Dark	Dry	7:30 - 10:00	-	No Record	2.5
June	2013	2013-06-03	Imantodes cenchoa	Chunk-headed Snake	Reptile	1	Waning Crescent (20.5% Full)	Dark	Light Rain	7:30 - 10:30	01:26:00	No Record	3
June	2013	2013-06-03	Leptodeira septentrionalis	Leptodeira septentrionalis	Reptile	1	Waning Crescent (20.5% Full)	Dark	Light Rain	7:30 - 10:30	01:26:00	No Record	0
June	2013	2013-06-17	Leptodeira septentrionalis	Northern Cat-eyed Snake	Reptile	2	Waxing Gibbous (62.1% Full)	Dark	Light Rain	8:00 - 10:00	12:24:00	No Record	2
June	2013	2013-06-24	Leptodeira septentrionalis	Northern Cat-eyed Snake	Reptile	2	Waning Gibbous (96.9% Full)	Semi-bright	Dry	8:00 - 10:00	19:21:00	No Record	2
June	2013	2013-06-25	Leptodeira septentrionalis	Leptodeira septentrionalis	Reptile	1	Waning Gibbous (91.6% Full)	Dark	Dry	7:30 - 10:00	20:16:00	No Record	2.5
June	2013	2013-06-26	Enuliophis sclateri	Sock-headed Snake	Reptile	2	Waning Gibbous (83.9% Full)	Dark	Dry	7:30 - 10:20	21:07:00	No Record	3
June	2013	2013-06-28	Leptodeira septentrionalis	Northern Cat-eyed Snake	Reptile	3	Waning Gibbous (64% Full)	Dark	Dry	8:00 - 10:00	22:40:00	No Record	2
June	2013	2013-06-30	Imantodes cenchoa	Chunk-headed Snake	Reptile	1	Waning Crescent (43.7% Full)	Dark	Dry	7:30 - 10:00	-	No Record	2.5
July	2013	2013-07-01	Enuliophis sclateri	Sock-headed Snake	Reptile	1	Waning Crescent (33.7% Full)	Dark	Dry	7:30 - 10:45	00:08:00	No Record	3.25
July	2013	2013-07-01	Imantodes cenchoa	Chunk-headed Snake	Reptile	1	Waning Crescent (33.7% Full)	Dark	Dry	7:30 - 10:45	00:08:00	No Record	0
July	2013	2013-07-01	Leptodeira septentrionalis	Northern Cat-eyed Snake	Reptile	2	Waning Crescent (33.7% Full)	Dark	Dry	7:30 - 10:45	00:08:00	No Record	0
July	2013	2013-07-03	Enuliophis sclateri	Sock-headed Snake	Reptile	1	Waning Crescent (16.8% Full)	Dark	Light Rain	7:30 - 10:15	01:36:00	No Record	2.75
July	2013	2013-07-03	Leptodeira septentrionalis	Northern Cat-eyed Snake	Reptile	1	Waning Crescent (16.8% Full)	Dark	Light Rain	7:30 - 10:15	01:36:00	No Record	0
July	2013	2013-07-06	Leptodeira septentrionalis	Northern Cat-eyed Snake	Reptile	1	Waning Crescent (1.9% Full)	Dark	Dry	7:30 - 10:00	03:57:00	No Record	2.5
July	2013	2013-07-07	Leptodeira septentrionalis	Northern Cat-eyed Snake	Reptile	1	Waning Crescent (0.2% Full)	Dark	Rainy	7:30 - 10:30	04:45:00	No Record	3
July	2013	2013-07-11	Imantodes cenchoa	Chunk-headed Snake	Reptile	1	Waxing Crescent (11% Full)	Dark	Dry	6:00 - 8:00	07:56:00	No Record	2
July	2013	2013-07-11	Enuliophis sclateri	Sock-headed Snake	Reptile	1	Waxing Crescent (11.4% Full)	Dark	Dry	7:30 - 10:30	07:56:00	No Record	0
July	2013	2013-07-11	Leptodeira septentrionalis	Northern Cat-eyed Snake	Reptile	1	Waxing Crescent (11.4% Full)	Dark	Dry	7:30 - 10:30	07:56:00	No Record	3
July	2013	2013-07-12	Enuliophis sclateri	Sock-headed Snake	Reptile	1	Waxing Crescent (18.5% Full)	Dark	Dry	7:30 - 10:30	08:43:00	No Record	0
July	2013	2013-07-12	Leptodeira septentrionalis	Northern Cat-eyed Snake	Reptile	1	Waxing Crescent (18.5% Full)	Dark	Dry	7:30 - 10:30	08:43:00	No Record	3
July	2013	2013-07-13	Leptodeira septentrionalis	Northern Cat-eyed Snake	Reptile	1	Waxing Crescent (26.8% Full)	Dark	Dry	7:30 - 10:30	09:30:00	No Record	3
July	2013	2013-07-14	Imantodes cenchoa	Chunk-headed Snake	Reptile	1	Waxing Crescent (36.3% Full)	Dark	Light Rain	7:30 - 10:30	10:19:00	No Record	3
July	2013	2013-07-14	Leptodeira septentrionalis	Northern Cat-eyed Snake	Reptile	1	Waxing Crescent (36.3% Full)	Dark	Light Rain	7:30 - 10:30	10:19:00	No Record	0
July	2013	2013-07-15	Leptodeira septentrionalis	Northern Cat-eyed Snake	Reptile	1	First Quarter (46.7% Full)	Dark	Light Rain	7:30 - 9:30	11:10:00	No Record	2
July	2013	2013-07-16	Imantodes cenchoa	Chunk-headed Snake	Reptile	1	Waxing Gibbous (57.7% Full)	Semi-bright	Dry	7:45 - 10:30	12:03:00	No Record	0
July	2013	2013-07-16	Leptodeira septentrionalis	Northern Cat-eyed Snake	Reptile	2	Waxing Gibbous (57.7% Full)	Semi-bright	Dry	7:45 - 10:30	12:03:00	No Record	2.75
July	2013	2013-07-17	Leptodeira septentrionalis	Northern Cat-eyed Snake	Reptile	2	Waxing Gibbous (68.5% Full)	Dark	Rainy	7:30 - 10:15	12:59:00	No Record	2.75
July	2013	2013-07-19	Leptodeira septentrionalis	Northern Cat-eyed Snake	Reptile	1	Waxing Gibbous (87.7% Full)	Bright	Dry	7:30 - 10:30	15:00:00	No Record	3
July	2013	2013-07-22	Leptodeira septentrionalis	Northern Cat-eyed Snake	Reptile	1	Full Moon (100% Full)	Bright	Dry	7:45 - 10:00	18:00:00	No Record	2.25
July	2013	2013-07-24	Enuliophis sclateri	Sock-headed Snake	Reptile	1	Waning Gibbous (93.6% Full)	Dark	Dry	7:30 - 10:30	19:45:00	No Record	3
July	2013	2013-07-24	Mastigodryas melanolomus	Neotropical Racer	Reptile	1	Waning Gibbous (93.6% Full)	Dark	Dry	7:30 - 10:30	19:45:00	No Record	0
July	2013	2013-07-25	Leptodeira septentrionalis	Northern Cat-eyed Snake	Reptile	1	Waning Gibbous (87.3% Full)	Dark	Dry	6:00 - 8:00	20:33:00	No Record	2
July	2013	2013-07-25	Leptodeira septentrionalis	Northern Cat-eyed Snake	Reptile	3	Waning Gibbous (86.9% Full)	Dark	Dry	7:30 - 10:30	20:33:00	No Record	3
July	2013	2013-07-25	Mastigodryas melanolomus	Neotropical Racer	Reptile	1	Waning Gibbous (86.9% Full)	Dark	Dry	7:30 - 10:30	20:33:00	No Record	0
July	2013	2013-07-27	Leptodeira septentrionalis	Northern Cat-eyed Snake	Reptile	1	Waning Gibbous (69.1% Full)	Dark	Dry	7:30 - 10:40	22:04:00	No Record	3
July	2013	2013-07-28	Leptodeira septentrionalis	Northern Cat-eyed Snake	Reptile	1	Waning Gibbous (59.1% Full)	Dark	Light Rain	7:30 - 10:40	22:48:00	No Record	3
July	2013	2013-07-30	Leptodeira septentrionalis	Northern Cat-eyed Snake	Reptile	1	Waning Crescent (39.3% Full)	Dark	Dry	7:30 - 10:15	-	No Record	2.75
August	2013	2013-08-01	Leptodeira septentrionalis	Northern Cat-eyed Snake	Reptile	1	Waning Crescent (21.9% Full)	Dark	Rainy	7:30 - 10:15	01:06:00	No Record	2.75
August	2013	2013-08-01	Leptodeira septentrionalis	Northern Cat-eyed Snake	Reptile	1	Waning Crescent (21.9% Full)	Dark	Rainy	7:30 - 10:15	01:06:00	No Record	0
August	2013	2013-08-02	Leptodeira septentrionalis	Northern Cat-eyed Snake	Reptile	1	Waning Crescent (14.5% Full)	Dark	Dry	7:30 - 10:15	01:54:00	No Record	2.75
August	2013	2013-08-05	Leptodeira septentrionalis	Northern Cat-eyed Snake	Reptile	1	Waning Crescent (1.1% Full)	Dark	Rainy	7:30 - 10:15	04:18:00	No Record	2.75
August	2013	2013-08-06	Enuliophis sclateri	Sock-headed Snake	Reptile	1	New Moon (0.0% Full)	Dark	Dry	7:00 - 9:00	05:06:00	No Record	2
August	2013	2013-08-23	Leptodeira septentrionalis	Northern Cat-eyed Snake	Reptile	1	Waning Gibbous (90.2% Full)	Dark	Dry	7:30 - 10:15	19:55:00	No Record	2.75
August	2013	2013-08-26	Leptodeira septentrionalis	Northern Cat-eyed Snake	Reptile	1	Waning Gibbous (65% Full)	Dark	Dry	7:30 - 10:20	22:14:00	No Record	3
August	2013	2013-08-29	Leptodeira septentrionalis	Northern Cat-eyed Snake	Reptile	1	Waning Crescent (36.4% Full)	Dark	Dry	7:30 - 10:20	none	No Record	3
September	2013	2013-09-10	Leptodeira septentrionalis	Northern Cat-eyed Snake	Reptile	4	Waxing Crescent (28.9% Full)	Dark	Rainy	5:45 - 8:00	09:44:00	No Record	2.25
September	2013	2013-09-10	Siphlophis compressus	Red-eyed Tree Snake	Reptile	1	Waxing Crescent (28.9% Full)	Dark	Rainy	5:45 - 8:00	09:44:00	No Record	0
September	2013	2013-09-11	Leptodeira septentrionalis	Common Cat-eyed Snake	Reptile	1	Waxing Crescent (40.3% Full)	Dark	Light Rain	7:30 - 10:20	10:41:00	No Record	3
September	2013	2013-09-11	Leptodeira septentrionalis	Northern Cat-eyed Snake	Reptile	3	Waxing Crescent (40.3% Full)	Dark	Light Rain	7:30 - 10:20	10:41:00	No Record	0
September	2013	2013-09-12	Leptodeira septentrionalis	Northern Cat-eyed Snake	Reptile	1	First Quartet (51.9% Full)	Dark	Dry	7:30 - 10:10	11:40:00	No Record	2.5
September	2013	2013-09-16	Leptodeira septentrionalis	Northern Cat-eyed Snake	Reptile	1	Waxing Gibbous (90.0% Full)	Bright	Light Rain	7:30 - 10:10	15:20:00	No Record	0
September	2013	2013-09-21	Imantodes cenchoa	Chunk-headed Snake	Reptile	1	Waning Gibbous (93.4% Full)	Semi-bright	Light Rain	7:30 - 10:20	19:18:00	No Record	0
September	2013	2013-09-21	Leptodeira septentrionalis	Northern Cat-eyed Snake	Reptile	1	Waning Gibbous (93.4% Full)	Semi-bright	Light Rain	7:30 - 10:20	19:18:00	No Record	3
September	2013	2013-09-23	Leptodeira septentrionalis	Northern Cat-eyed Snake	Reptile	1	Waning Gibbous (79.9% Full)	Dark	Dry	7:30 - 10:00	20:53:00	No Record	2.5
September	2013	2013-09-25	Leptodeira septentrionalis	Northern Cat-eyed Snake	Reptile	1	Waning Gibbous (62.5% Full)	Dark	Light Rain	7:15 - 9:45	22:30:00	No Record	2.5
October	2013	2013-10-20	Leptodeira septentrionalis	Northern Cat-eyed Snake	Reptile	1	Waning Gibbous (96.3% Full)	Semi-bright	Dry	7:30 - 10:50	18:44:00	No Record	3.5
October	2013	2013-10-20	Leptodeira septentrionalis	Northern Cat-eyed Snake	Reptile	1	Waning Gibbous (96.3% Full)	Semi-bright	Dry	7:30 - 10:50	18:44:00	No Record	0
October	2013	2013-10-21	Leptodeira septentrionalis	Northern Cat-eyed Snake	Reptile	1	Waning Gibbous (91.6% Full)	Dark	Dry	7:30 - 10:30	19:33:00	No Record	3
October	2013	2013-10-23	Leptodeira septentrionalis	Northern Cat-eyed Snake	Reptile	2	Waning Gibbous (81.5% Full)	Dark	Dry	7:30 - 10:00	21:10:00	No Record	2.5
November	2013	2013-11-04	Leptodeira septentrionalis	Northern Cat-eyed Snake	Reptile	1	Waxing Crescent (2.3% Full)	Dark	Dry	7:30 - 10:00	06:24:00	No Record	2.5
November	2013	2013-11-05	Leptodeira septentrionalis	Northern Cat-eyed Snake	Reptile	10	Waxing Crescent (7.3% Full)	Dark	Dry	8:00 - 10:00	07:24:00	No Record	2
November	2013	2013-11-08	Leptodeira septentrionalis	Northern Cat-eyed Snake	Reptile	1	Waxing Crescent (34.1% Full)	Dark	Light Rain	7:30 - 10:15	10:20:00	No Record	2.75
November	2013	2013-11-09	Leptodeira septentrionalis	Northern Cat-eyed Snake	Reptile	1	First Quarter (45.3% Full)	Dark	Dry	7:30 - 10:00	11:13:00	No Record	0
November	2013	2013-11-09	Siphlophis compressus	Red-eyed Tree Snake	Reptile	1	First Quarter (45.3% Full)	Dark	Dry	7:30 - 10:00	11:13:00	No Record	2.5
November	2013	2013-11-10	Leptodeira septentrionalis	Northern Cat-eyed Snake	Reptile	1	Waxing Gibbous (56.9% Full)	Dark	Rainy	8:00 - 10:00	12:02:00	No Record	2
November	2013	2013-11-13	Enuliophis sclateri	Sock-headed Snake	Reptile	1	Waxing Gibbous (85.7% Full)	Bright	Dry	8:00 - 10:20	14:20:00	No Record	2.5
November	2013	2013-11-16	Leptodeira septentrionalis	Northern Cat-eyed Snake	Reptile	1	Waxing Gibbous (99.4% Full)	Bright	Dry	7:30 - 10:15	16:38:00	No Record	2.75
November	2013	2013-11-17	Imantodes cenchoa	Chunk-headed Snake	Reptile	1	Full Moon (100% Full)	Bright	Dry	7:30 - 10:30	17:26:00	No Record	0
November	2013	2013-11-17	Siphlophis compressus	Red-eyed Tree Snake	Reptile	1	Full Moon (100% Full)	Bright	Dry	7:30 - 10:30	17:26:00	No Record	3
November	2013	2013-11-19	Imantodes cenchoa	Chunk-headed Snake	Reptile	1	Waning Gibbous (95.4% Full)	Semi-bright	Dry	7:30 - 10:18	19:03:00	No Record	0
November	2013	2013-11-19	Leptodeira septentrionalis	Northern Cat-eyed Snake	Reptile	1	Waning Gibbous (95.4% Full)	Semi-bright	Dry	7:30 - 10:18	19:03:00	No Record	2.75
November	2013	2013-11-21	Leptodeira septentrionalis	Northern Cat-eyed Snake	Reptile	1	Waning Gibbous (84.3% Full)	Dark	Dry	7:30 - 10:20	20:40:00	No Record	3
November	2013	2013-11-23	Leptodeira septentrionalis	Northern Cat-eyed Snake	Reptile	1	Waning Gibbous (68.3% Full)	Dark	Rainy	7:30 - 10:00	22:13:00	No Record	2.5
November	2013	2013-11-25	Leptodeira septentrionalis	Northern Cat-eyed Snake	Reptile	1	Last Quarter (50.2% Full)	Dark	Rainy	6:00 - 8:00	23:46:00	No Record	2
November	2013	2013-11-27	Imantodes cenchoa	Chunk-headed Snake	Reptile	1	Waning Crescent (30.4% Full)	Dark	Dry	7:30 - 10:15	00:34:00	No Record	0
November	2013	2013-11-27	Leptodeira septentrionalis	Northern Cat-eyed Snake	Reptile	1	Waning Crescent (30.4% Full)	Dark	Dry	7:30 - 10:15	00:34:00	No Record	2.75
November	2013	2013-11-28	Leptodeira septentrionalis	Northern Cat-eyed Snake	Reptile	1	Waning Crescent (20.8% Full)	Dark	Dry	8:00 - 10:30	01:22:00	No Record	2.5
November	2013	2013-11-30	Leptodeira septentrionalis	Northern Cat-eyed Snake	Reptile	1	Waning Crescent (6.4% Full)	Dark	Dry	7:30 - 10:30	03:08:00	No Record	0
November	2013	2013-11-30	Siphlophis compressus	Red-eyed Tree Snake	Reptile	1	Waning Crescent (6.4% Full)	Dark	Dry	7:30 - 10:30	03:08:00	No Record	3
December	2013	2013-12-02	Enuliophis sclateri	Sock-headed Snake	Reptile	1	New Moon (0% Full)	Dark	Dry	7:30 - 10:30	05:06:00	No Record	3
December	2013	2013-12-04	Imantodes cenchoa	Chunk-headed Snake	Reptile	1	Waxing Crescent (4.9% Full)	Dark	Dry	7:30 - 10:30	07:10:00	No Record	3
December	2013	2013-12-04	Leptodeira septentrionalis	Northern Cat-eyed Snake	Reptile	1	Waxing Crescent (4.9% Full)	Dark	Dry	7:30 - 10:30	07:10:00	No Record	0
December	2013	2013-12-06	Leptodeira septentrionalis	Northern Cat-eyed Snake	Reptile	1	Waxing Crescent (20% Full)	Dark	Dry	7:30 - 10:15	09:06:00	No Record	0
December	2013	2013-12-07	Enuliophis sclateri	Sock-headed Snake	Reptile	1	Waxing Crescent (30.2% Full)	Dark	Dry	8:00 - 10:15	09:58:00	No Record	0
December	2013	2013-12-07	Leptodeira septentrionalis	Northern Cat-eyed Snake	Reptile	1	Waxing Crescent (30.2% Full)	Dark	Dry	8:00 - 10:15	09:58:00	No Record	2.25
December	2013	2013-12-09	Leptodeira septentrionalis	Northern Cat-eyed Snake	Reptile	1	First Quarter (52.1% Full)	Dark	Light Rain	7:30 - 10:30	11:35:00	No Record	3
December	2013	2013-12-10	Enuliophis sclateri	Sock-headed Snake	Reptile	1	Waxing Gibbous (62.8% Full)	Bright	Dry	7:30 - 10:30	00:20:00	No Record	3
December	2013	2013-12-11	Enuliophis sclateri	Sock-headed Snake	Reptile	2	Waxing Gibbous (72..5% Full)	Bright	Dry	7:30 - 10:00	13:05:00	No Record	2.5
December	2013	2013-12-13	Leptodeira septentrionalis	Northern Cat-eyed Snake	Reptile	1	Waxing Gibbous (88.7% Full)	Bright	Dry	8:00 - 10:00	14:35:00	No Record	2
December	2013	2013-12-14	Imantodes cenchoa	Chunk-headed Snake	Reptile	1	Waxing Gibbous (94% Full)	Bright	Dry	7:30 - 10:30	15:22:00	No Record	3
December	2013	2013-12-17	Imantodes cenchoa	Chunk-headed Snake	Reptile	1	Full Moon (99.8% Full)	Bright	Light Rain	8:00 - 10:25	17:46:00	No Record	2.5
December	2013	2013-12-17	Leptodeira septentrionalis	Northern Cat-eyed Snake	Reptile	1	Full Moon (99.8% Full)	Bright	Light Rain	8:00 - 10:25	17:46:00	No Record	0
December	2013	2013-12-20	Leptodeira septentrionalis	Northern Cat-eyed Snake	Reptile	1	Waning Gibbous (89.5% Full)	Dark	Dry	7:30 - 10:15	20:09:00	No Record	2.75
December	2013	2013-12-22	Siphlophis compressus	Red-eyed Tree Snake	Reptile	1	Waning Gibbous (75.3% Full)	Dark	Dry	7:30 - 10:15	21:41:00	No Record	2.75
December	2013	2013-12-23	Leptodeira septentrionalis	Northern Cat-eyed Snake	Reptile	1	Waning Gibbous (67.4% Full)	Dark	Dry	6:00 - 8:00	22:27:00	No Record	2
December	2013	2013-12-23	Imantodes cenchoa	Chunk-headed Snake	Reptile	1	Waning Gibbous (66.7% Full)	Dark	Dry	7:30 - 10:00	22:27:00	No Record	2.5
December	2013	2013-12-25	Enuliophis sclateri	Sock-headed Snake	Reptile	1	Last Quarter (47.2% Full)	Dark	Dry	7:30 - 10:00	none	No Record	0
December	2013	2013-12-25	Imantodes cenchoa	Chunk-headed Snake	Reptile	1	Last Quarter (47.2% Full)	Dark	Dry	7:30 - 10:00	none	No Record	0
December	2013	2013-12-26	Imantodes cenchoa	Chunk-headed Snake	Reptile	1	Waning Crescent (37.9% Full)	Dark	Dry	5:30 - 7:45	00:03:00	No Record	2.75
December	2013	2013-12-26	Leptodeira septentrionalis	Northern Cat-eyed Snake	Reptile	1	Waning Crescent (37.9% Full)	Dark	Dry	5:30 - 7:45	00:03:00	No Record	0
December	2013	2013-12-27	Leptodeira septentrionalis	Northern Cat-eyed Snake	Reptile	1	Waning Crescent (26.7% Full)	Dark	Dry	8:00 - 10:00	00:54:00	No Record	2
December	2013	2013-12-28	Leptodeira septentrionalis	Northern Cat-eyed Snake	Reptile	1	Waning Crescent (18.2% Full)	Dark	Dry	6:00 - 8:30	01:54:00	No Record	2.5
December	2013	2013-12-29	Leptodeira septentrionalis	Northern Cat-eyed Snake	Reptile	1	Waning Crescent 10.3(% Full)	Dark	Dry	6:00 - 8:00	02:46:00	No Record	2
December	2013	2013-12-30	Leptodeira septentrionalis	Northern Cat-eyed Snake	Reptile	2	Waning Crescent (3.8% Full)	Dark	Dry	8:00 - 10:00	03:46:00	No Record	2
January	2014	2014-01-01	Imantodes cenchoa	Chunk-headed Snake	Reptile	1	New Moon (0.2% Full)	Dark	Rainy	8:00 - 10:00	05:50:00	17:55:00	2
January	2014	2014-01-02	Imantodes cenchoa	Chunk-headed Snake	Reptile	1	Waxing Crescent (2.9% Full)	Dark	Dry	7:30 - 10:00	06:50:00	18:58:00	2.5
January	2014	2014-01-04	Leptodeira septentrionalis	Northern Cat-eyed Snake	Reptile	1	Waxing Crescent (15.4% Full)	Dark	Light Rain	5:30 - 7:45	08:39:00	20:56:00	2.75
January	2014	2014-01-04	Imantodes cenchoa	Chunk-headed Snake	Reptile	1	Waxing Crescent (16.3% Full)	Dark	Dry	7:30 - 10:00	08:39:00	20:56:00	2.5
January	2014	2014-01-04	Leptodeira septentrionalis	Northern Cat-eyed Snake	Reptile	1	Waxing Crescent (16.3% Full)	Dark	Dry	7:30 - 10:00	08:39:00	20:56:00	0
January	2014	2014-01-07	Leptodeira septentrionalis	Northern Cat-eyed Snake	Reptile	1	First Quarter (45.6% Full)	Dark	Dry	5:30 - 7:30	11:02:00	23:36:00	2
January	2014	2014-01-10	Imantodes cenchoa	Chunk-headed Snake	Reptile	1	Waxing Gibbous (75.4% Full)	Semi-bright	Dry	6:00 - 8:00	13:20:00	01:17:00	2
January	2014	2014-01-10	Mastigodryas melanolomus	Juvenile Neotropical Racer	Reptile	1	Waxing Gibbous (75.4% Full)	Semi-bright	Dry	6:00 - 8:00	13:20:00	01:17:00	0
January	2014	2014-01-10	Mastigodryas melanolomus	Juvenile Neotropical Racer	Reptile	1	Waxing Gibbous (76% Full)	Semi-bright	Dry	7:45 - 10:00	13:20:00	01:17:00	0
January	2014	2014-01-10	Siphlophis compressus	Red-eyed Tree Snake	Reptile	1	Waxing Gibbous (76% Full)	Semi-bright	Dry	7:45 - 10:00	13:20:00	01:17:00	2.25
January	2014	2014-01-11	Leptodeira septentrionalis	Northern Cat-eyed Snake	Reptile	1	Waxing Gibbous (83.7% Full)	Bright	Dry	7:30 - 10:30	14:07:00	02:06:00	3
January	2014	2014-01-13	Imantodes cenchoa	Chunk-headed Snake	Reptile	1	Waxing Gibbous (95.2% Full)	Bright	Dry	7:30 - 10:00	15:43:00	03:45:00	2.5
January	2014	2014-01-15	Leptodeira septentrionalis	Northern Cat-eyed Snake	Reptile	1	Full Moon (99.9% Full)	Bright	Dry	7:30 - 10:00	17:19:00	05:18:00	2.5
January	2014	2014-01-16	Leptodeira septentrionalis	Northern Cat-eyed Snake	Reptile	1	Waning Gibbous (99.6% Full)	Bright	Dry	7:30 - 10:30	18:06:00	06:02:00	3
January	2014	2014-01-25	Imantodes cenchoa	Chunk-headed Snake	Reptile	2	Waning Crescent (32.7% Full)	Dark	Dry	7:30 - 10:30	00:32:00	12:35:00	3
January	2014	2014-01-25	Leptodeira septentrionalis	Northern Cat-eyed Snake	Reptile	1	Waning Crescent (32.7% Full)	Dark	Dry	7:30 - 10:30	00:32:00	12:35:00	0
January	2014	2014-01-26	Leptodeira septentrionalis	Northern Cat-eyed Snake	Reptile	1	Waning Crescent (22.6% Full)	Dark	Dry	7:30 - 10:30	01:29:00	13:31:00	3
January	2014	2014-01-26	Leptodeira septentrionalis	Northern Cat-eyed Snake	Reptile	1	Waning Crescent (22.6% Full)	Dark	Dry	7:30 - 10:30	01:29:00	13:31:00	0
January	2014	2014-01-28	Imantodes cenchoa	Chunk-headed Snake	Reptile	1	Waning Crescent (6.5% Full)	Dark	Dry	7:30 - 10:00	03:29:00	15:33:00	2.5
February	2014	2014-02-06	Imantodes cenchoa	Chunk-headed Snake	Reptile	1	First Quarter (50.3% Full)	Dark	Dry	7:30 - 10:30	11:16:00	none	3
February	2014	2014-02-11	Enuliophis sclateri	Sock-headed Snake	Reptile	4	Waxing Gibbous (91.1% Full)	Bright	Dry	7:30 - 10:15	15:15:00	03:15:00	2.75
February	2014	2014-02-13	Leptodeira septentrionalis	Northern Cat-eyed Snake	Reptile	1	Waxing Gibbous (98.6% Full)	Bright	Dry	6:00 - 8:00	16:50:00	04:43:00	2
February	2014	2014-02-13	Leptodeira septentrionalis	Northern Cat-eyed Snake	Reptile	1	Waxing Gibbous (98.8% Full)	Bright	Dry	8:00 - 10:00	16:50:00	04:43:00	0
February	2014	2014-02-13	Mastigodryas melanolomus	Neotropical Racer	Reptile	1	Waxing Gibbous (98.8% Full)	Bright	Dry	8:00 - 10:00	16:50:00	04:43:00	2
February	2014	2014-02-16	Imantodes cenchoa	Chunk-headed Snake	Reptile	1	Waning Gibbous(96.9% Full)	Bright	Dry	7:30 - 10:15	19:08:00	06:48:00	0
February	2014	2014-02-16	Leptodeira septentrionalis	Northern Cat-eyed Snake	Reptile	1	Waning Gibbous(96.9% Full)	Bright	Dry	7:30 - 10:15	19:08:00	06:48:00	2.75
February	2014	2014-02-17	Enuliophis sclateri	Sock-headed Snake	Reptile	1	Waning Gibbous(92.7% Full)	Bright	Dry	6:00 - 8:00	19:55:00	07:29:00	2
February	2014	2014-02-17	Leptodeira septentrionalis	Northern Cat-eyed Snake	Reptile	1	Waning Gibbous(92.7% Full)	Bright	Dry	6:00 - 8:00	19:55:00	07:29:00	0
February	2014	2014-02-21	Leptodeira septentrionalis	Northern Cat-eyed Snake	Reptile	1	Waning Gibbous(60.3% Full)	Dark	Dry	5:30 - 7:45	23:20:00	10:30:00	2.25
February	2014	2014-02-22	Imantodes cenchoa	Chunk-headed Snake	Reptile	1	Last Quarter (48.5% Full)	Dark	Dry	7:30 - 10:30	-	11:22:00	3
February	2014	2014-02-22	Leptodeira septentrionalis	Northern Cat-eyed Snake	Reptile	1	Last Quarter (48.5% Full)	Dark	Dry	7:30 - 10:30	-	11:22:00	0
February	2014	2014-02-23	Leptodeira septentrionalis	Northern Cat-eyed Snake	Reptile	1	Waning Crescent (37.4% Full)	Dark	Dry	7:30 - 10:30	00:17:00	12:18:00	3
February	2014	2014-02-24	Leptodeira septentrionalis	Northern Cat-eyed Snake	Reptile	1	Waning Crescent (26.8% Full)	Dark	Dry	7:30 - 10:10	01:15:00	13:17:00	2.75
February	2014	2014-02-25	Imantodes cenchoa	Chunk-headed Snake	Reptile	1	Waning Crescent (17.6% Full)	Dark	Dry	7:30 - 10:30	02:13:00	14:17:00	3
February	2014	2014-02-25	Leptodeira septentrionalis	Northern Cat-eyed Snake	Reptile	1	Waning Crescent (17.6% Full)	Dark	Dry	7:30 - 10:30	02:13:00	14:17:00	0
February	2014	2014-02-25	Leptodeira septentrionalis	Northern Cat-eyed Snake	Reptile	1	Waning Crescent (17.6% Full)	Dark	Dry	7:30 - 10:30	02:13:00	14:17:00	0
February	2014	2014-02-27	Imantodes cenchoa	Chunk-headed Snake	Reptile	1	Waning Crescent (3.3% Full)	Dark	Dry	7:30 - 10:30	04:06:00	16:18:00	3
February	2014	2014-02-27	Leptodeira septentrionalis	Northern Cat-eyed Snake	Reptile	3	Waning Crescent (3.3% Full)	Dark	Dry	7:30 - 10:30	04:06:00	16:18:00	0
February	2014	2014-02-28	Leptodeira septentrionalis	Northern Cat-eyed Snake	Reptile	1	Waning Crescent (0.4% Full)	Dark	Light Rain	7:30 - 10:30	05:00:00	17:17:00	3
March	2014	2014-03-01	Leptodeira septentrionalis	Northern Cat-eyed Snake	Reptile	1	New Moon (0.3% Full)	Dark	Dry	7:30 - 10:20	05:51:00	18:14:00	0
March	2014	2014-03-07	Leptodeira septentrionalis	Northern Cat-eyed Snake	Reptile	1	Waxing Crescent (42.9% Full)	Dark	Dry	7:30 - 10:15	10:45:00	23:34:00	2.75
March	2014	2014-03-08	Leptodeira septentrionalis	Northern Cat-eyed Snake	Reptile	2	First Quarter (52.6% Full)	Dark	Dry	7:30 - 10:15	11:34:00	-	2.75
March	2014	2014-03-10	Leptodeira septentrionalis	Northern Cat-eyed Snake	Reptile	1	Waxing Gibbous (71.1% Full)	Bright	Dry	7:30 - 10:20	13:11:00	01:11:00	3
March	2014	2014-03-10	Siphlophis compressus	Red-eyed Tree Snake	Reptile	1	Waxing Gibbous (71.1% Full)	Bright	Dry	7:30 - 10:20	13:11:00	01:11:00	0
March	2014	2014-03-12	Imantodes cenchoa	Chunk-headed Snake	Reptile	1	Waxing Gibbous (86.3% Full)	Bright	Dry	7:30 - 10:30	14:45:00	02:40:00	3
March	2014	2014-03-14	Leptodeira septentrionalis	Northern Cat-eyed Snake	Reptile	1	Waxing Gibbous (96.6% Full)	Bright	Dry	7:30 - 10:15	16:18:00	04:04:00	2.75
March	2014	2014-03-17	Leptodeira septentrionalis	Northern Cat-eyed Snake	Reptile	1	Waning Gibbbous (98.7% Full)	Bright	Dry	7:30 - 10:15	18:40:00	06:09:00	2.75
March	2014	2014-03-25	Leptodeira septentrionalis	Northern Cat-eyed Snake	Reptile	1	Waning Crescent (31.1% Full)	Dark	Dry	5:30 - 7:45	01:01:00	13:06:00	2.25
March	2014	2014-03-27	Imantodes cenchoa	Chunk-headed Snake	Reptile	1	Waning Crescent (11.5% Full)	Dark	Dry	7:30 - 10:15	02:48:00	15:02:00	2.75
March	2014	2014-03-29	Leptodeira septentrionalis	Northern Cat-eyed Snake	Reptile	1	Waning Crescent (1.4% Full)	Dark	Dry	5:30 - 7:45	04:29:00	16:54:00	2.25
March	2014	2014-03-29	Enuliophis sclateri	Sock-headed Snake	Reptile	1	Waning Crescent (1.2% Full)	Dark	Dry	7:30 - 10:30	04:29:00	16:54:00	3
March	2014	2014-03-29	Leptodeira septentrionalis	Northern Cat-eyed Snake	Reptile	1	Waning Crescent (1.2% Full)	Dark	Dry	7:30 - 10:30	04:29:00	16:54:00	0
March	2014	2014-03-31	Leptodeira septentrionalis	Northern Cat-eyed Snake	Reptile	1	Waxing Crescent (1.4% Full)	Dark	Dry	7:30 - 10:15	06:07:00	18:44:00	2.75
April	2014	2014-04-01	Leptodeira septentrionalis	Northern Cat-eyed Snake	Reptile	1	Waxing Crescent (5.3% Full)	Dark	Dry	8:00 - 10:00	05:56:00	19:38:00	2
April	2014	2014-04-02	Leptodeira septentrionalis	Northern Cat-eyed Snake	Reptile	1	Waxing Crescent (10.4% Full)	Dark	Dry	5:30 - 7:45	07:45:00	20:32:00	2.25
April	2014	2014-04-02	Leptodeira septentrionalis	Northern Cat-eyed Snake	Reptile	1	Waxing Crescent (11.1% Full)	Dark	Dry	7:30 - 10:30	07:45:00	20:32:00	3
April	2014	2014-04-07	Siphlophis compressus	Red-eyed Tree Snake	Reptile	1	First Quarter (54.5% Full)	Dark	Dry	7:30 - 10:15	11:52:00	-	2.75
April	2014	2014-04-08	Leptodeira septentrionalis	Northern Cat-eyed Snake	Reptile	2	Waxing Gibbous (64.8% Full)	Dark	Dry	7:30 - 10:15	12:39:00	00:35:00	2.75
April	2014	2014-04-13	Leptodeira septentrionalis	Northern Cat-eyed Snake	Reptile	1	Waxing Gibbous (97.7% Full)	Bright	Dry	8:00 - 9:30	16:34:00	04:05:00	1.5
April	2014	2014-04-14	Leptodeira septentrionalis	Northern Cat-eyed Snake	Reptile	1	Waxing Gibbous (99.7% Full)	Bright	Dry	6:00 - 8:00	17:24:00	04:48:00	2
April	2014	2014-04-15	Leptodeira septentrionalis	Northern Cat-eyed Snake	Reptile	1	Full Moon (99.8% Full)	Dark	Dry	6:00 - 8:00	18:16:00	05:34:00	2
April	2014	2014-04-18	Leptodeira septentrionalis	Northern Cat-eyed Snake	Reptile	1	Waning Gibbous (85.6% Full)	Dark	Dry	7:30 - 10:15	21:03:00	08:08:00	2.75
April	2014	2014-04-20	Leptodeira septentrionalis	Northern Cat-eyed Snake	Reptile	1	Waning Gibbous (67.4% Full)	Dark	Dry	6:00 - 8:00	22:57:00	10:03:00	2
April	2014	2014-04-20	Leptodeira septentrionalis	Northern Cat-eyed Snake	Reptile	1	Waning Gibbous (66.4% Full)	Dark	Dry	8:00 - 10:00	22:57:00	10:03:00	2
April	2014	2014-04-21	Imantodes cenchoa	Chunk-headed Snake	Reptile	3	Waning Gibbous (55.3% Full)	Dark	Dry	8:00 - 10:00	23:51:00	11:01:00	2
April	2014	2014-04-23	Leptodeira septentrionalis	Northern Cat-eyed Snake	Reptile	1	Waning Crescent (33% Full)	Dark	Dry	7:30 - 10:30	00:43:00	12:55:00	3
April	2014	2014-04-26	Imantodes cenchoa	Chunk-headed Snake	Reptile	1	Waning Crescent (7.2% Full)	Dark	Dry	6:00 - 8:00	03:10:00	15:38:00	2
April	2014	2014-04-26	Imantodes cenchoa	Chunk-headed Snake	Reptile	1	Waning Crescent (7% Full)	Dark	Dry	7:30 - 10:20	03:10:00	15:38:00	0
April	2014	2014-04-26	Leptodeira septentrionalis	Northern Cat-eyed Snake	Reptile	4	Waning Crescent (7% Full)	Dark	Dry	7:30 - 10:20	03:10:00	15:38:00	2.75
April	2014	2014-04-26	Mastigodryas melanolomus	Neotropical Racer	Reptile	1	Waning Crescent (7% Full)	Dark	Dry	7:30 - 10:20	03:10:00	15:38:00	0
April	2014	2014-04-27	Leptodeira septentrionalis	Northern Cat-eyed Snake	Reptile	2	Waning Crescent (2.4% Full)	Dark	Dry	7:30 - 10:20	03:58:00	16:32:00	2.75
April	2014	2014-04-28	Imantodes cenchoa	Chunk-headed Snake	Reptile	1	Waning Crescent (0.2% Full)	Dark	Light Rain	8:00 - 10:00	04:46:00	17:26:00	0
April	2014	2014-04-28	Leptodeira septentrionalis	Northern Cat-eyed Snake	Reptile	1	Waning Crescent (0.2% Full)	Dark	Light Rain	8:00 - 10:00	04:46:00	17:26:00	2
April	2014	2014-04-29	Imantodes cenchoa	Chunk-headed Snake	Reptile	1	New Moon (0.4% Full)	Dark	Dry	7:30 - 10:00	05:35:00	18:20:00	2.5
May	2014	2014-05-01	Leptodeira septentrionalis	Northern Cat-eyed Snake	Reptile	2	Waxing Crescent (7.3% Full)	Dark	Light Rain	8:00 - 10:00	07:15:00	20:05:00	2
May	2014	2014-05-03	Leptodeira septentrionalis	Northern Cat-eyed Snake	Reptile	2	Waxing Crescent (20.5% Full)	Dark	Dry	7:30 - 10:30	08:55:00	21:43:00	3
May	2014	2014-05-07	Leptodeira septentrionalis	Northern Cat-eyed Snake	Reptile	1	Waxing Gibbous (56.8% Full)	Dark	Dry	8:00 - 9:30	12:05:00	-	1.5
May	2014	2014-05-10	Imantodes cenchoa	Chunk-headed Snake	Reptile	1	Waxing Gibbous (83.1% Full)	Dark	Rainy	7:30 - 10:30	14:24:00	01:59:00	3
May	2014	2014-05-12	Imantodes cenchoa	Chunk-headed Snake	Reptile	1	Waxing Gibbous (95.6% Full)	Bright	Dry	7:30 - 10:30	16:05:00	03:26:00	3
May	2014	2014-05-16	Imantodes cenchoa	Chunk-headed Snake	Reptile	1	Waning Gibbous (94.5% Full)	Dark	Rainy	7:30 - 10:30	19:52:00	06:56:00	3
May	2014	2014-05-21	Siphlophis compressus	Red-eyed Tree Snake	Reptile	1	Last Quarter (46.8% Full)	Dark	Light Rain	7:30 - 10:30	-	11:47:00	3
May	2014	2014-05-23	Leptodeira septentrionalis	Northern Cat-eyed Snake	Reptile	1	Waning Crescent (25.7% Full)	Dark	Dry	6:00 - 10:00	01:07:00	13:33:00	2
May	2014	2014-05-29	Leptodeira septentrionalis	Northern Cat-eyed Snake	Reptile	1	Waxing Crescent (1.2% Full)	Dark	Light Rain	8:00 - 10:00	05:57:00	18:47:00	2
June	2014	2014-06-03	Leptodeira septentrionalis	Northern Cat-eyed Snake	Reptile	1	Waxing Crescent (31.3% Full)	Dark	Dry	7:30 - 10:30	09:59:00	22:33:00	3
June	2014	2014-06-04	Imantodes cenchoa	Chunk-headed Snake	Reptile	1	Waxing Crescent (40.2% Full)	Dark	Dry	7:30 - 10:30	10:45:00	23:13:00	3
June	2014	2014-06-05	Leptodeira septentrionalis	Northern Cat-eyed Snake	Reptile	1	First Quarter (49.3% Full)	Dark	Dry	6:30 - 9:30	11:30:00	23:54:00	3
June	2014	2014-06-05	Siphlophis compressus	Red-eyed Tree Snake	Reptile	1	First Quarter (49.3% Full)	Dark	Dry	6:30 - 9:30	11:30:00	23:54:00	0
June	2014	2014-06-10	Imantodes cenchoa	Chunk-headed Snake	Reptile	1	Waxing Gibbous (92.8% Full)	Bright	Dry	7:30 - 10:15	15:40:00	02:51:00	2.75
June	2014	2014-06-12	Leptodeira septentrionalis	Northern Cat-eyed Snake	Reptile	1	Full Moon (99.8% Full)	Dark	Dry	7:30 - 9:45	17:37:00	04:40:00	2.75
June	2014	2014-06-13	Imantodes cenchoa	Chunk-headed Snake	Reptile	1	Waning Gibbous (99.3% Full)	Dark	Light Rain	7:30 - 10:15	18:38:00	05:40:00	2.75
June	2014	2014-06-14	Enuliophis sclateri	Sock-headed Snake	Reptile	1	Waning Gibbous (95.8% Full)	Bright	Dry	7:30 - 10:30	19:37:00	06:42:00	3
June	2014	2014-06-14	Leptodeira septentrionalis	Northern Cat-eyed Snake	Reptile	1	Waning Gibbous (95.8% Full)	Bright	Dry	7:30 - 10:30	19:37:00	06:42:00	0
June	2014	2014-06-17	Enuliophis sclateri	Sock-headed Snake	Reptile	1	Waning Gibbous (71.6% Full)	Dark	Dry	7:30 - 10:30	22:18:00	09:41:00	0
June	2014	2014-06-18	Imantodes cenchoa	Chunk-headed Snake	Reptile	1	Waning Gibbous (60.7% Full)	Dark	Dry	7:30 - 10:15	23:06:00	10:37:00	0
June	2014	2014-06-19	Leptodeira septentrionalis	Northern Cat-eyed Snake	Reptile	1	Last Quarter (49.2% Full)	Dark	Dry	7:30 - 10:15	23:53:00	11:30:00	2.75
June	2014	2014-06-22	Imantodes cenchoa	Chunk-headed Snake	Reptile	1	Waning Crescent (18.9% Full)	Dark	Light Rain	8:00 - 9:45	01:27:00	14:07:00	1.75
June	2014	2014-06-22	Leptodeira septentrionalis	Northern Cat-eyed Snake	Reptile	1	Waning Crescent (18.9% Full)	Dark	Light Rain	8:00 - 9:45	01:27:00	14:07:00	0
June	2014	2014-06-24	Enuliophis sclateri	Sock-headed Snake	Reptile	1	Waning Crescent (6.3% Full)	Dark	Light Rain	8:00 - 10:00	03:03:00	15:51:00	2
June	2014	2014-06-24	Leptodeira septentrionalis	Northern Cat-eyed Snake	Reptile	2	Waning Crescent (6.3% Full)	Dark	Light Rain	8:00 - 10:00	03:03:00	15:51:00	0
June	2014	2014-06-25	Leptodeira septentrionalis	Northern Cat-eyed Snake	Reptile	1	Waning Crescent (2.2% Full)	Dark	Light Rain	7:30 - 10:15	03:52:00	16:42:00	2.75
June	2014	2014-06-27	Mastigodryas melanolomus	Neotropical Racer	Reptile	1	New Moon (0.3% Full)	Dark	Dry	8:00 - 10:00	05:31:00	18:19:00	2
June	2014	2014-06-30	Leptodeira septentrionalis	Northern Cat-eyed Snake	Reptile	1	Waxing Crescent (11.2% Full)	Dark	Rainy	8:00 - 10:00	07:55:00	20:30:00	2
July	2014	2014-07-02	Leptodeira septentrionalis	Northern Cat-eyed Snake	Reptile	1	Waxing Crescent (25.3% Full)	Dark	Dry	7:30 - 10:15	09:26:00	21:51:00	2.75
July	2014	2014-07-02	Mastigodryas melanolomus	Neotropical Racer	Reptile	1	Waxing Crescent (25.3% Full)	Dark	Dry	7:30 - 10:15	09:26:00	21:51:00	0
July	2014	2014-07-06	Leptodeira septentrionalis	Northern Cat-eyed Snake	Reptile	2	Waxing Gibbous (63.8% Full)	Dark	Rainy	8:00 - 10:30	12:33:00	-	2.5
July	2014	2014-07-07	Leptodeira septentrionalis	Northern Cat-eyed Snake	Reptile	1	Waxing Gibbous (73.3% Full)	Bright	Dry	7:30 - 10:15	13:25:00	00:41:00	2.75
July	2014	2014-07-11	Imantodes cenchoa	Chunk-headed Snake	Reptile	1	Waxing Gibbous (99.2% Full)	Bright	Dry	6:00 - 8:00	17:19:00	04:22:00	2
July	2014	2014-07-11	Leptodeira septentrionalis	Northern Cat-eyed Snake	Reptile	1	Waxing Gibbous (99.2% Full)	Bright	Dry	6:00 - 8:00	17:19:00	04:22:00	0
July	2014	2014-07-15	Leptodeira septentrionalis	Northern Cat-eyed Snake	Reptile	1	Waning Gibbous (83.5% Full)	Dark	Light Rain	8:00 - 10:00	21:01:00	08:27:00	2
July	2014	2014-07-16	Siphlophis compressus	Red-eyed Tree Snake	Reptile	1	Waning Gibbous (74.2% Full)	Dark	Dry	7:30 - 10:30	21:50:00	09:23:00	0
August	2014	2014-08-01	Leptodeira septentrionalis	Northern Cat-eyed Snake	Reptile	2	Waxing Crescent (28.6% Full)	Dark	Dry	7:30 - 10:30	09:40:00	21:53:00	3
August	2014	2014-08-04	Imantodes cenchoa	Chunk-headed Snake	Reptile	1	Waxing Gibbous (58.9% Full)	Dark	Light Rain	8:00 - 10:00	12:09:00	-	0
August	2014	2014-08-04	Leptodeira septentrionalis	Northern Cat-eyed Snake	Reptile	1	Waxing Gibbous (58.9% Full)	Dark	Light Rain	8:00 - 10:00	12:09:00	-	2
August	2014	2014-08-05	Enuliophis sclateri	Sock-headed Snake	Reptile	1	Waxing Gibbous (69% Full)	Dark	Dry	7:30 - 10:15	13:04:00	00:12:00	2.75
August	2014	2014-08-05	Imantodes cenchoa	Chunk-headed Snake	Reptile	1	Waxing Gibbous (69% Full)	Dark	Dry	7:30 - 10:15	13:04:00	00:12:00	0
August	2014	2014-08-06	Imantodes cenchoa	Chunk-headed Snake	Reptile	1	Waxing Gibbous (79% Full)	Dark	Dry	7:30 - 10:30	14:02:00	01:06:00	0
August	2014	2014-08-06	Leptodeira septentrionalis	Northern Cat-eyed Snake	Reptile	1	Waxing Gibbous (79% Full)	Dark	Dry	7:30 - 10:30	14:02:00	01:06:00	3
August	2014	2014-08-06	Leptodeira septentrionalis	Northern Cat-eyed Snake	Reptile	1	Waxing Gibbous (79% Full)	Dark	Dry	7:30 - 10:30	14:02:00	01:06:00	0
August	2014	2014-08-08	Siphlophis compressus	Red-eyed Tree Snake	Reptile	1	Waxing Gibbous (94.3% Full)	Bright	Dry	7:30 - 10:30	16:00:00	03:04:00	3
August	2014	2014-08-09	Enuliophis sclateri	Sock-headed Snake	Reptile	1	Waxing Gibbous (98.7% Full)	Bright	Dry	7:30 - 10:30	16:58:00	04:06:00	3
August	2014	2014-08-12	Leptodeira septentrionalis	Northern Cat-eyed Snake	Reptile	1	Waning Gibbous (93.3% Full)	Dark	Dry	8:00 - 10:00	19:39:00	07:08:00	2
August	2014	2014-08-18	Leptodeira septentrionalis	Northern Cat-eyed Snake	Reptile	1	Waning Crescent (36.6% Full)	Dark	Dry	7:30 - 10:15	-	12:35:00	2.75
August	2014	2014-08-19	Leptodeira septentrionalis	Northern Cat-eyed Snake	Reptile	1	Waning Crescent (27.5% Full)	Dark	Dry	7:30 - 10:30	00:36:00	13:25:00	3
August	2014	2014-08-19	Leptodeira septentrionalis	Northern Cat-eyed Snake	Reptile	1	Waning Crescent (27.5% Full)	Dark	Dry	7:30 - 10:30	00:36:00	13:25:00	0
August	2014	2014-08-20	Leptodeira septentrionalis	Northern Cat-eyed Snake	Reptile	1	Waning Crescent (19.3% Full)	Dark	Light Rain	7:30 - 10:30	01:25:00	14:14:00	3
August	2014	2014-08-21	Enuliophis sclateri	Sock-headed Snake	Reptile	1	Waning Crescent (12.1% Full)	Dark	Dry	8:00 - 10:00	02:14:00	15:00:00	0
August	2014	2014-08-21	Imantodes cenchoa	Chunk-headed Snake	Reptile	2	Waning Crescent (12.1% Full)	Dark	Dry	8:00 - 10:00	02:14:00	15:00:00	2
August	2014	2014-08-24	Leptodeira septentrionalis	Northern Cat-eyed Snake	Reptile	1	Waning Crescent (0.5% Full)	Dark	Dry	7:30 - 10:15	04:35:00	17:10:00	2.75
August	2014	2014-08-26	Leptodeira septentrionalis	Northern Cat-eyed Snake	Reptile	1	Waxing Crescent (1.4% Full)	Dark	Light Rain	8:00 - 10:00	06:06:00	18:31:00	2
August	2014	2014-08-27	Imantodes cenchoa	Chunk-headed Snake	Reptile	1	Waxing Crescent (4.5% Full)	Dark	Light Rain	7:30 - 10:45	06:52:00	19:11:00	3.25
August	2014	2014-08-29	Leptodeira septentrionalis	Northern Cat-eyed Snake	Reptile	2	Waxing Crescent (16% Full)	Dark	Dry	7:30 - 10:20	09:13:00	21:20:00	2.75
August	2014	2014-08-31	Imantodes cenchoa	Chunk-headed Snake	Reptile	1	Waxing Crescent (33.2% Full)	Dark	Dry	7:30 - 10:30	10:04:00	22:07:00	0
August	2014	2014-08-31	Leptodeira septentrionalis	Northern Cat-eyed Snake	Reptile	2	Waxing Crescent (33.2% Full)	Dark	Dry	7:30 - 10:30	10:04:00	22:07:00	3
August	2014	2014-08-31	Siphlophis compressus	Red-eyed Tree Snake	Reptile	1	Waxing Crescent (33.2% Full)	Dark	Dry	7:30 - 10:30	10:04:00	22:07:00	0
September	2014	2014-09-01	Enuliophis sclateri	Sock-headed Snake	Reptile	1	Waxing Crescent (43.4% Full)	Dark	Dry	7:30 - 11:00	10:56:00	22:58:00	0
September	2014	2014-09-01	Leptodeira septentrionalis	Northern Cat-eyed Snake	Reptile	2	Waxing Crescent (43.4% Full)	Dark	Dry	7:30 - 11:00	10:56:00	22:58:00	3.5
September	2014	2014-09-01	Siphlophis compressus	Red-eyed Tree Snake	Reptile	1	Waxing Crescent (43.4% Full)	Dark	Dry	7:30 - 11:00	10:56:00	22:58:00	0
September	2014	2014-09-03	Imantodes cenchoa	Chunk-headed Snake	Reptile	1	Waxing Gibbous (65% Full)	Dark	Light Rain	7:30 - 10:30	12:48:00	-	3
September	2014	2014-09-03	Leptodeira septentrionalis	Northern Cat-eyed Snake	Reptile	1	Waxing Gibbous (65% Full)	Dark	Light Rain	7:30 - 10:30	12:48:00	-	0
September	2014	2014-09-05	Leptodeira septentrionalis	Northern Cat-eyed Snake	Reptile	1	Waxing Gibbous (86.2% Full)	Bright	Dry	8:00 - 10:00	14:42:00	01:49:00	0
September	2014	2014-09-05	Mastigodryas melanolomus	Neotropical Racer	Reptile	1	Waxing Gibbous (86.2% Full)	Bright	Dry	8:00 - 10:00	14:42:00	01:49:00	2
September	2014	2014-09-06	Imantodes cenchoa	Chunk-headed Snake	Reptile	1	Waxing Gibbous (92.6% Full)	Bright	Light Rain	7:30 - 10:30	15:37:00	02:49:00	3
September	2014	2014-09-07	Leptodeira septentrionalis	Northern Cat-eyed Snake	Reptile	1	Waxing Gibbous (97.74% Full)	Semi-bright	Rainy	7:30 - 10:30	16:31:00	03:49:00	3
September	2014	2014-09-11	Imantodes cenchoa	Chunk-headed Snake	Reptile	1	Waning Gibbous (89.5% Full)	Dark	Light Rain	7:30 - 10:30	19:57:00	07:42:00	0
September	2014	2014-09-11	Leptodeira septentrionalis	Northern Cat-eyed Snake	Reptile	1	Waning Gibbous (89.5% Full)	Dark	Light Rain	7:30 - 10:30	19:57:00	07:42:00	3
September	2014	2014-09-15	Leptodeira septentrionalis	Northern Cat-eyed Snake	Reptile	4	Last Quarter (52.5% Full)	Dark	Light Rain	7:30 - 10:30	23:20:00	11:19:00	3
September	2014	2014-09-15	Siphlophis compressus	Red-eyed Tree Snake	Reptile	1	Last Quarter (52.5% Full)	Dark	Light Rain	7:30 - 10:30	23:20:00	11:19:00	0
September	2014	2014-09-16	Enuliophis sclateri	Sock-headed Snake	Reptile	1	Waning Crescent (42.6% Full)	Dark	Dry	7:30 - 10:45	-	00:09:00	0
September	2014	2014-09-16	Leptodeira septentrionalis	Northern Cat-eyed Snake	Reptile	1	Waning Crescent (42.6% Full)	Dark	Dry	7:30 - 10:45	-	00:09:00	0
September	2014	2014-09-16	Mastigodryas melanolomus	Neotropical Racer	Reptile	1	Waning Crescent (42.6% Full)	Dark	Dry	7:30 - 10:45	-	00:09:00	0
October	2014	2014-10-17	Enuliophis sclateri	Sock-headed Snake	Reptile	1	Waning Crescent (31.4% Full)	Dark	Light Rain	7:00 - 10:00	00:28:00	13:05:00	0
October	2014	2014-10-17	Leptodeira septentrionalis	Northern Cat-eyed Snake	Reptile	2	Waning Crescent (31.4% Full)	Dark	Light Rain	7:00 - 10:00	00:28:00	13:05:00	3
October	2014	2014-10-18	Imantodes cenchoa	Chunk-headed Snake	Reptile	1	Waning Crescent (23.7% Full)	Dark	Rainy	7:30 - 10:00	01:14:00	13:47:00	2.5
October	2014	2014-10-18	Leptodeira septentrionalis	Northern Cat-eyed Snake	Reptile	1	Waning Crescent (23.7% Full)	Dark	Rainy	7:30 - 10:00	01:14:00	13:47:00	0
October	2014	2014-10-19	Enuliophis sclateri	Sock-headed Snake	Reptile	1	Waning Crescent (15.2% Full)	Dark	Dry	7:45 - 10:00	01:59:00	14:27:00	0
October	2014	2014-10-19	Leptodeira septentrionalis	Northern Cat-eyed Snake	Reptile	1	Waning Crescent (15.2% Full)	Dark	Dry	7:45 - 10:00	01:59:00	14:27:00	0
October	2014	2014-10-19	Siphlophis compressus	Red-eyed Tree Snake	Reptile	1	Waning Crescent (15.2% Full)	Dark	Dry	7:45 - 10:00	01:59:00	14:27:00	2.25
October	2014	2014-10-20	Imantodes cenchoa	Chunk-headed Snake	Reptile	1	Waning Crescent (9% Full)	Dark	Rainy	7:45 - 10:00	02:45:00	15:07:00	2.25
October	2014	2014-10-20	Leptodeira septentrionalis	Northern Cat-eyed Snake	Reptile	1	Waning Crescent (9% Full)	Dark	Rainy	7:45 - 10:00	02:45:00	15:07:00	0
October	2014	2014-10-22	Enuliophis sclateri	Sock-headed Snake	Reptile	1	Waning Crescent (1.1% Full)	Dark	Dry	7:45 - 10:15	04:18:00	16:32:00	2.5
October	2014	2014-10-22	Leptodeira septentrionalis	Northern Cat-eyed Snake	Reptile	1	Waning Crescent (1.1% Full)	Dark	Dry	7:45 - 10:15	04:18:00	16:32:00	0
November	2014	2014-11-05	Imantodes cenchoa	Chunk-headed Snake	Reptile	1	Waxing Gibbous (98.3% Full)	Dark	Light Rain	5:30 - 7:45	16:23:00	04:07:00	2.25
November	2014	2014-11-05	Imantodes cenchoa	Chunk-headed Snake	Reptile	1	Waxing Gibbous (99.6% Full)	Bright	Light Rain	7:30 - 10:30	16:23:00	04:07:00	3
November	2014	2014-11-07	Imantodes cenchoa	Chunk-headed Snake	Reptile	1	Waning Gibbous (98.9% Full)	Bright	Dry	8:00 - 10:00	18:06:00	05:59:00	2
November	2014	2014-11-07	Leptodeira septentrionalis	Northern Cat-eyed Snake	Reptile	1	Waning Gibbous (98.9% Full)	Bright	Dry	8:00 - 10:00	18:06:00	05:59:00	0
November	2014	2014-11-10	Leptodeira septentrionalis	Northern Cat-eyed Snake	Reptile	1	Waning Gibbous (83.6% Full)	Dark	Dry	7:30 - 10:30	20:43:00	08:41:00	3
November	2014	2014-11-12	Leptodeira septentrionalis	Northern Cat-eyed Snake	Reptile	2	Waning Gibbous (66.5% Full)	Dark	Dry	7:30 - 10:30	22:21:00	10:16:00	3
November	2014	2014-11-14	Leptodeira septentrionalis	Northern Cat-eyed Snake	Reptile	2	Last Quarter (48.2% Full)	Dark	Dry	7:30 - 10:30	23:54:00	11:43:00	3
November	2014	2014-11-15	Leptodeira septentrionalis	Northern Cat-eyed Snake	Reptile	1	Waning Crescent (38.8% Full)	Dark	Dry	7:30 - 10:40	-	12:24:00	0
November	2014	2014-11-16	Leptodeira septentrionalis	Northern Cat-eyed Snake	Reptile	1	Waning Crescent (29.9% Full)	Dark	Rainy	7:30 - 10:00	00:39:00	13:04:00	2.5
November	2014	2014-11-18	Mastigodryas melanolomus	Neotropical Racer	Reptile	1	Waning Crescent (14% Full)	Dark	Dry	7:30 - 10:20	02:10:00	14:26:00	3
November	2014	2014-11-19	Leptodeira septentrionalis	Northern Cat-eyed Snake	Reptile	2	Waning Crescent (7.8% Full)	Dark	Dry	7:30 - 10:40	02:58:00	15:09:00	3.25
November	2014	2014-11-22	Mastigodryas melanolomus	Neotropical Racer	Reptile	1	New Moon (0.1% Full)	Dark	Dry	7:30 - 10:26	05:33:00	17:36:00	3
November	2014	2014-11-24	Enuliophis sclateri	Sock-headed Snake	Reptile	1	Waxing Crescent (6.5% Full)	Dark	Dry	7:30 - 10:40	07:26:00	19:29:00	3
November	2014	2014-11-24	Imantodes cenchoa	Chunk-headed Snake	Reptile	1	Waxing Crescent (6.5% Full)	Dark	Dry	7:30 - 10:40	07:26:00	19:29:00	0
November	2014	2014-11-24	Imantodes cenchoa	Chunk-headed Snake	Reptile	1	Waxing Crescent (6.5% Full)	Dark	Dry	7:30 - 10:40	07:26:00	19:29:00	0
November	2014	2014-11-24	Leptodeira septentrionalis	Northern Cat-eyed Snake	Reptile	1	Waxing Crescent (6.5% Full)	Dark	Dry	7:30 - 10:40	07:26:00	19:29:00	0
November	2014	2014-11-26	Leptodeira septentrionalis	Northern Cat-eyed Snake	Reptile	1	Waxing Crescent (21.2% Full)	Dark	Dry	5:30 - 7:55	09:18:00	21:25:00	0
November	2014	2014-11-26	Leptodeira septentrionalis	Northern Cat-eyed Snake	Reptile	1	Waxing Crescent (22.1% Full)	Dark	Dry	7:30 - 10:30	09:18:00	21:25:00	3
November	2014	2014-11-28	Leptodeira septentrionalis	Northern Cat-eyed Snake	Reptile	1	Waxing Crescent (43.3% Full)	Dark	Dry	7:30 - 10:30	11:02:00	23:18:00	3
November	2014	2014-11-29	Leptodeira septentrionalis	Northern Cat-eyed Snake	Reptile	1	First Quarter (54.6% Full)	Semi-bright	Dry	7:30 - 10:30	11:52:00	-	3
November	2014	2014-11-29	Mastigodryas melanolomus	Neotropical Racer	Reptile	1	First Quarter (54.6% Full)	Semi-bright	Dry	7:30 - 10:30	11:52:00	-	0
November	2014	2014-11-30	Imantodes cenchoa	Chunk-headed Snake	Reptile	1	Waxing Gibbous (65.8% Full)	Semi-bright	Dry	7:30 - 10:30	12:40:00	00:12:00	0
December	2014	2014-12-01	Imantodes cenchoa	Chunk-headed Snake	Reptile	3	Waxing Gibbous (76% Full)	Bright	Dry	7:30 - 10:30	13:28:00	01:06:00	3
December	2014	2014-12-06	Leptodeira septentrionalis	Northern Cat-eyed Snake	Reptile	1	Full Moon (99.9% Full)	Dark	Light Rain	5:30 - 7:50	17:40:00	05:37:00	2.5
December	2014	2014-12-08	Enuliophis sclateri	Sock-headed Snake	Reptile	1	Waning Gibbous (94.4% Full)	Semi-bright	Light Rain	7:00 - 9:45	19:23:00	07:21:00	2.75
December	2014	2014-12-08	Leptodeira septentrionalis	Northern Cat-eyed Snake	Reptile	1	Waning Gibbous (94.4% Full)	Semi-bright	Light Rain	7:00 - 9:45	19:23:00	07:21:00	0
December	2014	2014-12-10	Leptodeira septentrionalis	Northern Cat-eyed Snake	Reptile	1	Waning Gibbous (82% Full)	Dark	Dry	8:00 - 10:30	21:01:00	08:54:00	2.5
December	2014	2014-12-15	Imantodes cenchoa	Chunk-headed Snake	Reptile	1	Waning Crescent (37.6% Full)	Dark	Dry	7:30 - 10:30	00:02:00	12:20:00	3
December	2014	2014-12-17	Leptodeira septentrionalis	Northern Cat-eyed Snake	Reptile	2	Waning Crescent (19.8% Full)	Dark	Light Rain	7:30 - 10:45	01:36:00	13:46:00	3.25
December	2014	2014-12-18	Leptodeira septentrionalis	Northern Cat-eyed Snake	Reptile	1	Waning Crescent (12.3% Full)	Dark	Light Rain	7:30 - 10:20	02:26:00	14:33:00	3
December	2014	2014-12-20	Imantodes cenchoa	Chunk-headed Snake	Reptile	1	Waning Crescent (2.2% Full)	Dark	Dry	6:00 - 8:00	04:14:00	16:17:00	2
December	2014	2014-12-20	Leptodeira septentrionalis	Northern Cat-eyed Snake	Reptile	1	Waning Crescent (2.2% Full)	Dark	Dry	6:00 - 8:00	04:14:00	16:17:00	0
December	2014	2014-12-20	Imantodes cenchoa	Chunk-headed Snake	Reptile	1	Waning Crescent (1.9% Full)	Dark	Rainy	7:30 - 10:15	04:14:00	16:17:00	0
December	2014	2014-12-20	Leptodeira septentrionalis	Northern Cat-eyed Snake	Reptile	1	Waning Crescent (1.9% Full)	Dark	Rainy	7:30 - 10:15	04:14:00	16:17:00	2.75
December	2014	2014-12-21	Leptodeira septentrionalis	Northern Cat-eyed Snake	Reptile	1	New Moon (0.1% Full)	Dark	Light Rain	7:30 - 10:30	05:12:00	17:15:00	3
December	2014	2014-12-22	Leptodeira septentrionalis	Northern Cat-eyed Snake	Reptile	1	Waxing Crescent (0.6% Full)	Dark	Dry	5:30 - 8:00	06:10:00	18:14:00	2.5
December	2014	2014-12-25	Enuliophis sclateri	Sock-headed Snake	Reptile	1	Waxing Crescent (18.2% Full)	Dark	Dry	6:00 - 8:00	08:58:00	21:12:00	0
December	2014	2014-12-25	Imantodes cenchoa	Chunk-headed Snake	Reptile	1	Waxing Crescent (18.2% Full)	Dark	Dry	6:00 - 8:00	08:58:00	21:12:00	2
December	2014	2014-12-25	Leptodeira septentrionalis	Northern Cat-eyed Snake	Reptile	1	Waxing Crescent (18.2% Full)	Dark	Dry	6:00 - 8:00	08:58:00	21:12:00	0
December	2014	2014-12-25	Enuliophis sclateri	Sock-headed Snake	Reptile	1	Waxing Crescent (18.7% Full)	Dark	Dry	7:30 - 10:45	08:58:00	21:12:00	3.25
December	2014	2014-12-25	Siphlophis compressus	Red-eyed Tree Snake	Reptile	1	Waxing Crescent (18.7% Full)	Dark	Dry	7:30 - 10:45	08:58:00	21:12:00	0
December	2014	2014-12-26	Enuliophis sclateri	Sock-headed Snake	Reptile	1	Waxing Crescent (27.6% Full)	Dark	Dry	5:30 - 8:00	09:49:00	22:08:00	0
December	2014	2014-12-26	Imantodes cenchoa	Chunk-headed Snake	Reptile	1	Waxing Crescent (27.6% Full)	Dark	Dry	5:30 - 8:00	09:49:00	22:08:00	0
December	2014	2014-12-26	Leptodeira septentrionalis	Northern Cat-eyed Snake	Reptile	1	Waxing Crescent (27.6% Full)	Dark	Dry	5:30 - 8:00	09:49:00	22:08:00	0
December	2014	2014-12-26	Siphlophis compressus	Red-eyed Tree Snake	Reptile	1	Waxing Crescent (27.6% Full)	Dark	Dry	5:30 - 8:00	09:49:00	22:08:00	2.5
December	2014	2014-12-27	Imantodes cenchoa	Chunk-headed Snake	Reptile	1	Waxing Crescent (38.7% Full)	Dark	Dry	6:00 - 8:00	10:38:00	23:03:00	2
December	2014	2014-12-27	Leptodeira septentrionalis	Northern Cat-eyed Snake	Reptile	1	Waxing Crescent (39.5% Full)	Dark	Dry	7:30 - 10:30	10:38:00	23:03:00	3
December	2014	2014-12-29	Leptodeira septentrionalis	Northern Cat-eyed Snake	Reptile	1	Waxing Gibbous (61.7% Full)	Dark	Dry	7:30 - 10:30	12:15:00	-	0
December	2014	2014-12-29	Leptodeira septentrionalis	Northern Cat-eyed Snake	Reptile	1	Waxing Gibbous (61.7% Full)	Dark	Dry	7:30 - 10:30	12:15:00	-	0
December	2014	2014-12-30	Imantodes cenchoa	Chunk-headed Snake	Reptile	1	Waxing Gibbous (72.2% Full)	Dark	Dry	7:30 - 10:30	13:03:00	00:50:00	0
December	2014	2014-12-30	Leptodeira septentrionalis	Northern Cat-eyed Snake	Reptile	1	Waxing Gibbous (72.2% Full)	Dark	Dry	7:30 - 10:30	13:03:00	00:50:00	3
January	2015	2015-01-02	Imantodes cenchoa	Chunk-headed Snake	Reptile	1	Waxing Gibbous (94% Full)	Bright	Dry	5:30 - 7:55	15:33:00	03:30:00	2.5
January	2015	2015-01-02	Imantodes cenchoa	Chunk-headed Snake	Reptile	1	Waxing Gibbous (94.5% Full)	Bright	Dry	7:30 - 10:30	15:33:00	03:30:00	0
January	2015	2015-01-02	Leptodeira septentrionalis	Northern Cat-eyed Snake	Reptile	1	Waxing Gibbous (94.5% Full)	Bright	Dry	7:30 - 10:30	15:33:00	03:30:00	3
January	2015	2015-01-05	Imantodes cenchoa	Chunk-headed Snake	Reptile	1	Waning Gibbous (99.6% Full)	Bright	Dry	7:30 - 10:30	18:05:00	06:02:00	3
January	2015	2015-01-05	Leptodeira septentrionalis	Northern Cat-eyed Snake	Reptile	1	Waning Gibbous (99.6% Full)	Bright	Dry	7:30 - 10:30	18:05:00	06:02:00	0
January	2015	2015-01-06	Imantodes cenchoa	Chunk-headed Snake	Reptile	1	Waning Gibbous (97.7% Full)	Dark	Dry	5:30 - 7:55	18:54:00	06:49:00	2.5
January	2015	2015-01-06	Leptodeira septentrionalis	Northern Cat-eyed Snake	Reptile	1	Waning Gibbous (97.3% Full)	Bright	Dry	8:00 - 10:00	18:54:00	06:49:00	2
January	2015	2015-01-07	Imantodes cenchoa	Chunk-headed Snake	Reptile	1	Waning Gibbous (93.8% Full)	Dark	Dry	5:30 - 7:55	19:41:00	07:33:00	2.5
January	2015	2015-01-08	Imantodes cenchoa	Chunk-headed Snake	Reptile	1	Waning Gibbous (88.1% Full)	Dark	Dry	7:30 - 10:30	20:27:00	08:15:00	3
January	2015	2015-01-08	Leptodeira septentrionalis	Northern Cat-eyed Snake	Reptile	2	Waning Gibbous (88.1% Full)	Dark	Dry	7:30 - 10:30	20:27:00	08:15:00	0
January	2015	2015-01-09	Imantodes cenchoa	Chunk-headed Snake	Reptile	1	Waning Gibbous (81.2% Full)	Dark	Dry	7:30 - 10:40	21:11:00	08:56:00	3
January	2015	2015-01-10	Leptodeira septentrionalis	Northern Cat-eyed Snake	Reptile	3	Waning Gibbous (73.3% Full)	Dark	Dry	7:30 - 10:30	21:56:00	09:36:00	3
January	2015	2015-01-11	Leptodeira septentrionalis	Northern Cat-eyed Snake	Reptile	1	Waning Gibbous (64.6% Full)	Dark	Dry	7:30 - 10:30	22:41:00	10:18:00	3
January	2015	2015-01-11	Leptodeira septentrionalis	Northern Cat-eyed Snake	Reptile	1	Waning Gibbous (64.6% Full)	Dark	Dry	7:30 - 10:30	22:41:00	10:18:00	0
January	2015	2015-01-13	Enuliophis sclateri	Sock-headed Snake	Reptile	1	Last Quarter (45.7% Full)	Dark	Dry	7:30 - 10:30	-	11:38:00	3
January	2015	2015-01-13	Imantodes cenchoa	Chunk-headed Snake	Reptile	1	Last Quarter (45.7% Full)	Dark	Dry	7:30 - 10:30	-	11:38:00	0
January	2015	2015-01-15	Leptodeira septentrionalis	Northern Cat-eyed Snake	Reptile	1	Waning Crescent (26.4% Full)	Dark	Light Rain	7:30 - 10:30	01:05:00	13:10:00	3
January	2015	2015-01-17	Leptodeira septentrionalis	Northern Cat-eyed Snake	Reptile	1	Waning Crescent (10% Full)	Dark	Light Rain	7:30 - 10:45	02:54:00	14:57:00	3.25
January	2015	2015-01-23	Enuliophis sclateri	Sock-headed Snake	Reptile	1	Waxing Crescent (14.4% Full)	Dark	Dry	5:30 - 8:00	08:32:00	20:54:00	2.5
January	2015	2015-01-23	Enuliophis sclateri	Sock-headed Snake	Reptile	1	Waxing Crescent (15.1% Full)	Dark	Dry	7:30 - 10:30	08:32:00	20:54:00	0
January	2015	2015-01-23	Leptodeira septentrionalis	Northern Cat-eyed Snake	Reptile	1	Waxing Crescent (15.1% Full)	Dark	Dry	7:30 - 10:30	08:32:00	20:54:00	3
January	2015	2015-01-24	Imantodes cenchoa	Chunk-headed Snake	Reptile	1	Waxing Crescent (24.6% Full)	Dark	Dry	7:30 - 10:30	09:22:00	21:50:00	3
January	2015	2015-01-25	Leptodeira septentrionalis	Northern Cat-eyed Snake	Reptile	1	Waxing Crescent (35% Full)	Dark	Dry	7:30 - 10:15	10:11:00	22:45:00	2.75
January	2015	2015-01-26	Imantodes cenchoa	Chunk-headed Snake	Reptile	1	First Quarter (46% Full)	Dark	Dry	7:30 - 10:15	11:01:00	23:39:00	2.75
January	2015	2015-01-28	Leptodeira septentrionalis	Northern Cat-eyed Snake	Reptile	1	Waxing Gibbous (66.3% Full)	Dark	Light Rain	5:30 - 8:00	12:40:00	00:33:00	2.5
January	2015	2015-01-28	Imantodes cenchoa	Chunk-headed Snake	Reptile	1	Waxing Gibbous (67.4% Full)	Dark	Dry	7:30 - 10:30	12:40:00	00:33:00	3
January	2015	2015-01-29	Imantodes cenchoa	Chunk-headed Snake	Reptile	1	Waxing Gibbous (76.5% Full)	Bright	Dry	7:30 - 10:30	13:30:00	01:26:00	3
January	2015	2015-01-30	Mastigodryas melanolomus	Neotropical Racer	Reptile	1	Waxing Gibbous (83.9% Full)	Semi-bright	Dry	5:30 - 8:00	14:21:00	02:19:00	2.5
January	2015	2015-01-30	Imantodes cenchoa	Chunk-headed Snake	Reptile	1	Waxing Gibbous (84.6% Full)	Semi-bright	Dry	7:30 - 10:15	14:21:00	02:19:00	2.75
January	2015	2015-01-30	Mastigodryas melanolomus	Neotropical Racer	Reptile	1	Waxing Gibbous (84.6% Full)	Semi-bright	Dry	7:30 - 10:15	14:21:00	02:19:00	0
January	2015	2015-01-31	Leptodeira septentrionalis	Northern Cat-eyed Snake	Reptile	1	Waxing Gibbous (91% Full)	Bright	Dry	7:30 - 10:45	15:11:00	03:09:00	3.25
February	2015	2015-02-06	Leptodeira septentrionalis	Northern Cat-eyed Snake	Reptile	1	Waning Gibbous (92.6% Full)	Dark	Light Rain	8:00 - 10:15	19:53:00	07:34:00	0
February	2015	2015-02-09	Leptodeira septentrionalis	Northern Cat-eyed Snake	Reptile	2	Waning Gibbous (71.9% Full)	Dark	Light Rain	7:30 - 10:15	22:09:00	09:35:00	2.75
February	2015	2015-02-17	Imantodes cenchoa	Chunk-headed Snake	Reptile	1	Waning Crescent (2.3% Full)	Dark	Dry	5:30 - 8:00	03:30:00	15:36:00	2.5
February	2015	2015-02-17	Enuliophis sclateri	Sock-headed Snake	Reptile	1	Waning Crescent (2% Full)	Dark	Dry	7:30 - 10:20	03:30:00	15:36:00	3
February	2015	2015-02-17	Leptodeira septentrionalis	Northern Cat-eyed Snake	Reptile	1	Waning Crescent (2% Full)	Dark	Dry	7:30 - 10:20	03:30:00	15:36:00	0
February	2015	2015-02-18	Leptodeira septentrionalis	Northern Cat-eyed Snake	Reptile	1	New Moon (0.1% Full)	Dark	Dry	5:30 - 8:00	05:23:00	17:38:00	2.5
February	2015	2015-02-18	Leptodeira septentrionalis	Northern Cat-eyed Snake	Reptile	1	New Moon (0% Full)	Dark	Dry	7:30 - 10:15	05:23:00	17:38:00	2.75
February	2015	2015-02-19	Leptodeira septentrionalis	Northern Cat-eyed Snake	Reptile	1	Waxing Crescent (0.9% Full)	Dark	Dry	6:00 - 8:00	06:17:00	18:38:00	2
February	2015	2015-02-19	Imantodes cenchoa	Chunk-headed Snake	Reptile	1	Waxing Crescent (1.1% Full)	Dark	Dry	7:30 - 10:15	06:17:00	18:38:00	0
February	2015	2015-02-19	Leptodeira septentrionalis	Northern Cat-eyed Snake	Reptile	1	Waxing Crescent (1.1% Full)	Dark	Dry	7:30 - 10:15	06:17:00	18:38:00	0
February	2015	2015-02-21	Leptodeira septentrionalis	Northern Cat-eyed Snake	Reptile	1	Waxing Crescent (11.7% Full)	Dark	Dry	7:30 - 10:30	08:01:00	20:34:00	3
February	2015	2015-02-21	Leptodeira septentrionalis	Northern Cat-eyed Snake	Reptile	1	Waxing Crescent (11.7% Full)	Dark	Dry	7:30 - 10:30	08:01:00	20:34:00	0
February	2015	2015-02-22	Leptodeira septentrionalis	Northern Cat-eyed Snake	Reptile	1	Waxing Crescent (19.5% Full)	Dark	Dry	5:30 - 8:00	08:53:00	21:30:00	2.5
February	2015	2015-02-22	Imantodes cenchoa	Chunk-headed Snake	Reptile	1	Waxing Crescent (20.5% Full)	Dark	Dry	7:30 - 10:30	08:53:00	21:30:00	0
February	2015	2015-02-22	Leptodeira septentrionalis	Northern Cat-eyed Snake	Reptile	1	Waxing Crescent (20.5% Full)	Dark	Dry	7:30 - 10:30	08:53:00	21:30:00	3
February	2015	2015-02-23	Leptodeira septentrionalis	Northern Cat-eyed Snake	Reptile	2	Waxing Crescent (28.3% Full)	Dark	Dry	5:30 - 8:00	09:44:00	22:26:00	2.5
February	2015	2015-02-23	Imantodes cenchoa	Chunk-headed Snake	Reptile	1	Waxing Crescent (30.6% Full)	Dark	Dry	8:00 - 10:15	09:44:00	22:26:00	2.25
February	2015	2015-02-25	Imantodes cenchoa	Chunk-headed Snake	Reptile	1	First Quarter (50.4% Full)	Dark	Dry	5:30 - 8:00	11:26:00	-	2.5
February	2015	2015-02-25	Siphlophis compressus	Red-eyed Tree Snake	Reptile	1	First Quarter (50.4% Full)	Dark	Dry	5:30 - 8:00	11:26:00	-	0
February	2015	2015-02-25	Leptodeira septentrionalis	Northern Cat-eyed Snake	Reptile	1	First Quarter (51.3% Full)	Dark	Dry	7:30 - 10:15	11:26:00	-	2.75
February	2015	2015-02-26	Leptodeira septentrionalis	Northern Cat-eyed Snake	Reptile	1	Waxing Gibbous (61.5% Full)	Semi-bright	Dry	7:30 - 10:30	12:17:00	00:14:00	3
February	2015	2015-02-26	Siphlophis compressus	Red-eyed Tree Snake	Reptile	1	Waxing Gibbous (61.5% Full)	Semi-bright	Dry	7:30 - 10:30	12:17:00	00:14:00	0
March	2015	2015-03-01	Leptodeira septentrionalis	Northern Cat-eyed Snake	Reptile	1	Waxing Gibbous (86.7% Full)	Bright	Dry	7:30 - 10:30	14:47:00	02:43:00	3
March	2015	2015-03-01	Leptodeira septentrionalis	Northern Cat-eyed Snake	Reptile	1	Waxing Gibbous (86.7% Full)	Bright	Dry	7:30 - 10:30	14:47:00	02:43:00	0
March	2015	2015-03-04	Leptodeira septentrionalis	Northern Cat-eyed Snake	Reptile	1	Waxing Gibbous (99.2% Full)	Bright	Dry	7:30 - 10:15	17:06:00	04:53:00	2.75
March	2015	2015-03-05	Imantodes cenchoa	Chunk-headed Snake	Reptile	1	Full Moon (100% Full)	Bright	Dry	8:00 - 10:20	17:51:00	05:34:00	2.25
March	2015	2015-03-06	Imantodes cenchoa	Chunk-headed Snake	Reptile	1	Waning Gibbous (99.1% Full)	Dark	Dry	5:30 - 8:00	18:36:00	06:14:00	2.5
March	2015	2015-03-06	Leptodeira septentrionalis	Northern Cat-eyed Snake	Reptile	1	Waning Gibbous (99.1% Full)	Dark	Dry	5:30 - 8:00	18:36:00	06:14:00	0
March	2015	2015-03-06	Imantodes cenchoa	Chunk-headed Snake	Reptile	1	Waning Gibbous (98.9% Full)	Bright	Dry	7:30 - 10:30	18:36:00	06:14:00	0
March	2015	2015-03-06	Leptodeira septentrionalis	Northern Cat-eyed Snake	Reptile	1	Waning Gibbous (98.9% Full)	Bright	Dry	7:30 - 10:30	18:36:00	06:14:00	3
March	2015	2015-03-06	Leptodeira septentrionalis	Northern Cat-eyed Snake	Reptile	1	Waning Gibbous (98.9% Full)	Bright	Dry	7:30 - 10:30	18:36:00	06:14:00	0
March	2015	2015-03-07	Imantodes cenchoa	Chunk-headed Snake	Reptile	1	Waning Gibbous (96.4% Full)	Dark	Dry	5:30 - 8:00	19:21:00	06:54:00	2.5
March	2015	2015-03-08	Imantodes cenchoa	Chunk-headed Snake	Reptile	1	Waning Gibbous (91.7% Full)	Dark	Dry	7:30 - 10:00	20:06:00	07:34:00	2.5
March	2015	2015-03-08	Leptodeira septentrionalis	Northern Cat-eyed Snake	Reptile	1	Waning Gibbous (91.7% Full)	Dark	Dry	7:30 - 10:00	20:06:00	07:34:00	0
March	2015	2015-03-10	Leptodeira septentrionalis	Northern Cat-eyed Snake	Reptile	1	Waning Gibbous (78% Full)	Dark	Dry	7:30 - 10:30	21:42:00	09:00:00	3
March	2015	2015-03-11	Leptodeira septentrionalis	Northern Cat-eyed Snake	Reptile	1	Waning Gibbous (69% Full)	Dark	Dry	7:30 - 10:30	22:33:00	09:46:00	3
March	2015	2015-03-12	Leptodeira septentrionalis	Northern Cat-eyed Snake	Reptile	3	Waning Gibbous (59.3% Full)	Dark	Dry	7:30 - 10:30	23:26:00	10:35:00	3
March	2015	2015-03-13	Imantodes cenchoa	Chunk-headed Snake	Reptile	1	Last Quarter (49.8% Full)	Dark	Dry	7:30 - 10:30	-	11:27:00	0
March	2015	2015-03-13	Siphlophis compressus	Red-eyed Tree Snake	Reptile	1	Last Quarter (49.8% Full)	Dark	Dry	7:30 - 10:30	-	11:27:00	3
March	2015	2015-03-14	Leptodeira septentrionalis	Northern Cat-eyed Snake	Reptile	1	Waning Crescent (37.6% Full)	Dark	Dry	7:30 - 10:15	00:20:00	12:22:00	2.75
March	2015	2015-03-16	Leptodeira septentrionalis	Northern Cat-eyed Snake	Reptile	2	Waning Crescent (17.9% Full)	Dark	Dry	7:30 - 10:15	02:11:00	14:18:00	2.75
March	2015	2015-03-17	Leptodeira septentrionalis	Northern Cat-eyed Snake	Reptile	1	Waning Crescent (10.2% Full)	Dark	Dry	6:00 - 8:00	03:06:00	15:18:00	2
March	2015	2015-03-18	Siphlophis compressus	Red-eyed Tree Snake	Reptile	1	Waning Crescent (3.9% Full)	Dark	Dry	6:00 - 8:00	04:00:00	16:17:00	0
March	2015	2015-03-18	Siphlophis compressus	Red-eyed Tree Snake	Reptile	1	Waning Crescent (3.6% Full)	Dark	Dry	7:30 - 10:15	04:00:00	16:17:00	0
March	2015	2015-03-20	Imantodes cenchoa	Chunk-headed Snake	Reptile	1	New Moon (0.2% Full)	Dark	Dry	7:30 - 10:30	05:46:00	18:15:00	3
March	2015	2015-03-21	Leptodeira septentrionalis	Northern Cat-eyed Snake	Reptile	1	Waxing Crescent (3.2% Full)	Dark	Dry	8:00 - 10:30	06:38:00	19:13:00	0
March	2015	2015-03-21	Mastigodryas melanolomus	Neotropical Racer	Reptile	1	Waxing Crescent (3.2% Full)	Dark	Dry	8:00 - 10:30	06:38:00	19:13:00	0
March	2015	2015-03-22	Imantodes cenchoa	Chunk-headed Snake	Reptile	1	Waxing Crescent (8.6% Full)	Dark	Dry	7:30 - 10:15	07:31:00	20:11:00	2.75
March	2015	2015-03-22	Leptodeira septentrionalis	Northern Cat-eyed Snake	Reptile	1	Waxing Crescent (8.6% Full)	Dark	Dry	7:30 - 10:15	07:31:00	20:11:00	0
March	2015	2015-03-22	Leptodeira septentrionalis	Northern Cat-eyed Snake	Reptile	1	Waxing Crescent (8.6% Full)	Dark	Dry	7:30 - 10:15	07:31:00	20:11:00	0
March	2015	2015-03-24	Imantodes cenchoa	Chunk-headed Snake	Reptile	1	Waxing Crescent (24.5% Full)	Dark	Dry	5:30 - 8:00	09:17:00	22:05:00	2.5
March	2015	2015-03-26	Imantodes cenchoa	Chunk-headed Snake	Reptile	1	Waxing Crescent (45% Full)	Dark	Dry	7:30 - 10:30	11:02:00	23:50:00	3
March	2015	2015-03-28	Leptodeira septentrionalis	Northern Cat-eyed Snake	Reptile	1	Waxing Gibbous (65% Full)	Dark	Dry	7:30 - 10:40	12:43:00	00:39:00	3.25
March	2015	2015-03-29	Leptodeira septentrionalis	Northern Cat-eyed Snake	Reptile	1	Waxing Gibbous (73.9% Full)	Dark	Dry	8:00 - 10:30	13:31:00	01:26:00	2.5
March	2015	2015-03-30	Leptodeira septentrionalis	Northern Cat-eyed Snake	Reptile	1	Waxing Gibbous (81.6% Full)	Bright	Dry	7:30 - 10:30	14:18:00	02:10:00	3
March	2015	2015-03-31	Leptodeira septentrionalis	Northern Cat-eyed Snake	Reptile	1	Waxing Gibbous (88.3% Full)	Bright	Dry	7:30 - 10:40	15:03:00	02:52:00	3
April	2015	2015-04-01	Leptodeira septentrionalis	Northern Cat-eyed Snake	Reptile	1	Waxing Gibbous (93.7% Full)	Bright	Dry	7:30 - 10:30	15:48:00	03:33:00	2
April	2015	2015-04-03	Imantodes cenchoa	Chunk-headed Snake	Reptile	1	Waxing Gibbous (99.5% Full)	Bright	Dry	6:30 - 8:45	17:18:00	04:53:00	0
April	2015	2015-04-03	Leptodeira septentrionalis	Northern Cat-eyed Snake	Reptile	1	Waxing Gibbous (99.5% Full)	Bright	Dry	6:30 - 8:45	17:18:00	04:53:00	2.25
April	2015	2015-04-04	Imantodes cenchoa	Chunk-headed Snake	Reptile	1	Full Moon (99.9% Full)	Bright	Dry	7:30 - 10:40	18:04:00	05:35:00	3
April	2015	2015-04-05	Leptodeira septentrionalis	Northern Cat-eyed Snake	Reptile	1	Waning Gibbous (98.5% Full)	Dark	Dry	5:45 - 8:00	18:51:00	06:15:00	2.25
April	2015	2015-04-07	Leptodeira septentrionalis	Northern Cat-eyed Snake	Reptile	1	Waning Gibbous (89.5% Full)	Dark	Dry	7:30 - 10:30	20:30:00	07:44:00	3
April	2015	2015-04-08	Leptodeira septentrionalis	Northern Cat-eyed Snake	Reptile	1	Waning Gibbous (82.5% Full)	Dark	Dry	7:30 - 10:30	21:22:00	08:33:00	3
April	2015	2015-04-09	Siphlophis compressus	Red-eyed Tree Snake	Reptile	1	Waning Gibbous (74% Full)	Dark	Dry	7:30 - 10:30	22:14:00	09:23:00	3
April	2015	2015-04-10	Enuliophis sclateri	Sock-headed Snake	Reptile	1	Waning Gibbous (64.7% Full)	Dark	Dry	6:00 - 8:00	23:08:00	10:16:00	2
April	2015	2015-04-11	Leptodeira septentrionalis	Northern Cat-eyed Snake	Reptile	1	Last Quarter (53.5% Full)	Dark	Light Rain	7:30 - 10:30	-	11:11:00	3
April	2015	2015-04-12	Imantodes cenchoa	Chunk-headed Snake	Reptile	1	Waning Crescent (42.5% Full)	Dark	Dry	7:30 - 10:30	00:02:00	12:08:00	3
April	2015	2015-04-13	Enuliophis sclateri	Sock-headed Snake	Reptile	1	Waning Crescent (31.4% Full)	Dark	Dry	7:30 - 10:15	00:55:00	13:05:00	2.75
April	2015	2015-04-13	Leptodeira septentrionalis	Northern Cat-eyed Snake	Reptile	1	Waning Crescent (31.4% Full)	Dark	Dry	7:30 - 10:15	00:55:00	13:05:00	0
April	2015	2015-04-13	Mastigodryas melanolomus	Neotropical Racer	Reptile	1	Waning Crescent (31.4% Full)	Dark	Dry	7:30 - 10:15	00:55:00	13:05:00	0
April	2015	2015-04-14	Leptodeira septentrionalis	Northern Cat-eyed Snake	Reptile	1	Waning Crescent (20.8% Full)	Dark	Dry	8:00 - 10:00	01:48:00	14:02:00	2
April	2015	2015-04-14	Mastigodryas melanolomus	Neotropical Racer	Reptile	1	Waning Crescent (20.8% Full)	Dark	Dry	8:00 - 10:00	01:48:00	14:02:00	0
April	2015	2015-04-17	Enuliophis sclateri	Sock-headed Snake	Reptile	1	Waning Crescent (1.2% Full)	Dark	Dry	7:30 - 10:45	04:23:00	16:55:00	0
April	2015	2015-04-17	Leptodeira septentrionalis	Northern Cat-eyed Snake	Reptile	1	Waning Crescent (1.2% Full)	Dark	Dry	7:30 - 10:45	04:23:00	16:55:00	0
April	2015	2015-04-17	Mastigodryas melanolomus	Neotropical Racer	Reptile	1	Waning Crescent (1.2% Full)	Dark	Dry	7:30 - 10:45	04:23:00	16:55:00	0
April	2015	2015-04-17	Siphlophis compressus	Red-eyed Tree Snake	Reptile	1	Waning Crescent (1.2% Full)	Dark	Dry	7:30 - 10:45	04:23:00	16:55:00	0
April	2015	2015-04-19	Imantodes cenchoa	Chunk-headed Snake	Reptile	1	Waxing Crescent (1.6% Full)	Dark	Dry	7:30 - 10:30	06:08:00	18:52:00	0
April	2015	2015-04-19	Leptodeira septentrionalis	Northern Cat-eyed Snake	Reptile	1	Waxing Crescent (1.6% Full)	Dark	Dry	7:30 - 10:30	06:08:00	18:52:00	3
April	2015	2015-04-27	Imantodes cenchoa	Chunk-headed Snake	Reptile	2	Waxing Gibbous (67.1% Full)	Dark	Dry	7:30 - 10:30	12:59:00	00:49:00	0
April	2015	2015-04-27	Leptodeira septentrionalis	Northern Cat-eyed Snake	Reptile	1	Waxing Gibbous (67.1% Full)	Dark	Dry	7:30 - 10:30	12:59:00	00:49:00	3
April	2015	2015-04-30	Leptodeira septentrionalis	Northern Cat-eyed Snake	Reptile	1	Waxing Gibbous (89.9% Full)	Semi-bright	Dry	7:30 - 10:30	15:14:00	02:51:00	3
May	2015	2015-05-01	Leptodeira septentrionalis	Northern Cat-eyed Snake	Reptile	1	Waxing Gibbous (94.6% Full)	Dark	Dry	6:00 - 8:00	16:00:00	03:31:00	2
May	2015	2015-05-01	Enuliophis sclateri	Sock-headed Snake	Reptile	1	Waxing Gibbous (95% Full)	Bright	Dry	7:30 - 10:30	16:00:00	03:31:00	3
May	2015	2015-05-04	Imantodes cenchoa	Chunk-headed Snake	Reptile	1	Waning Gibbous (99.5% Full)	Semi-bright	Dry	7:30 - 10:30	18:26:00	05:41:00	0
May	2015	2015-05-04	Leptodeira septentrionalis	Northern Cat-eyed Snake	Reptile	3	Waning Gibbous (99.5% Full)	Semi-bright	Dry	7:30 - 10:30	18:26:00	05:41:00	3
May	2015	2015-05-04	Leptodeira septentrionalis	Northern Cat-eyed Snake	Reptile	1	Waning Gibbous (99.5% Full)	Semi-bright	Dry	7:30 - 10:30	18:26:00	05:41:00	0
May	2015	2015-05-11	Leptodeira septentrionalis	Northern Cat-eyed Snake	Reptile	2	Last Quarter (45.5% Full)	Dark	Dry	7:30 - 10:30	-	11:54:00	3
May	2015	2015-05-12	Imantodes cenchoa	Chunk-headed Snake	Reptile	1	Waning Crescent (34.3% Full)	Dark	Dry	7:30 - 10:10	00:33:00	12:50:00	2.25
May	2015	2015-05-12	Leptodeira septentrionalis	Northern Cat-eyed Snake	Reptile	2	Waning Crescent (34.3% Full)	Dark	Dry	7:30 - 10:10	00:33:00	12:50:00	0
May	2015	2015-05-17	Leptodeira septentrionalis	Northern Cat-eyed Snake	Reptile	1	New Moon (0.1% Full)	Dark	Dry	7:30 - 10:15	04:48:00	17:33:00	2.75
May	2015	2015-05-21	Imantodes cenchoa	Chunk-headed Snake	Reptile	1	Waxing Crescent (15.4% Full)	Dark	Dry	7:30 - 10:20	08:25:00	21:12:00	0
May	2015	2015-05-21	Leptodeira septentrionalis	Northern Cat-eyed Snake	Reptile	3	Waxing Crescent (15.4% Full)	Dark	Dry	7:30 - 10:20	08:25:00	21:12:00	2.75
May	2015	2015-05-27	Imantodes cenchoa	Chunk-headed Snake	Reptile	2	Waxing Gibbous (69.5% Full)	Semi-bright	Dry	7:30 - 10:05	13:09:00	00:48:00	2.5
May	2015	2015-05-27	Leptodeira septentrionalis	Northern Cat-eyed Snake	Reptile	2	Waxing Gibbous (69.5% Full)	Semi-bright	Dry	7:30 - 10:05	13:09:00	00:48:00	0
May	2015	2015-05-28	Enuliophis sclateri	Sock-headed Snake	Reptile	1	Waxing Gibbous (78% Full)	Bright	Dry	7:30 - 10:10	13:54:00	01:28:00	2.25
May	2015	2015-05-28	Imantodes cenchoa	Chunk-headed Snake	Reptile	1	Waxing Gibbous (78% Full)	Bright	Dry	7:30 - 10:10	13:54:00	01:28:00	0
May	2015	2015-05-28	Leptodeira septentrionalis	Northern Cat-eyed Snake	Reptile	1	Waxing Gibbous (78% Full)	Bright	Dry	7:30 - 10:10	13:54:00	01:28:00	0
June	2015	2015-06-01	Enuliophis sclateri	Sock-headed Snake	Reptile	1	Waxing Gibbous (99.3% Full)	Bright	Light Rain	7:45 - 10:00	17:10:00	04:22:00	0
June	2015	2015-06-01	Leptodeira septentrionalis	Northern Cat-eyed Snake	Reptile	1	Waxing Gibbous (99.3% Full)	Bright	Light Rain	7:45 - 10:00	17:10:00	04:22:00	2.25
June	2015	2015-06-02	Imantodes cenchoa	Chunk-headed Snake	Reptile	1	Full Moon (100% Full)	Semi-bright	Dry	7:30 - 10:15	18:04:00	05:13:00	2.25
June	2015	2015-06-04	Leptodeira septentrionalis	Northern Cat-eyed Snake	Reptile	1	Waning Gibbous (94.4% Full)	Dark	Light Rain	8:00 - 10:00	19:53:00	07:01:00	2
June	2015	2015-06-06	Imantodes cenchoa	Chunk-headed Snake	Reptile	1	Waning Gibbous (80.1% Full)	Dark	Dry	7:30 - 10:30	21:40:00	08:54:00	3
June	2015	2015-06-12	Imantodes cenchoa	Chunk-headed Snake	Reptile	1	Waning Crescent (16.5% Full)	Dark	Dry	7:50 - 10:25	01:48:00	14:26:00	2.25
June	2015	2015-06-12	Leptodeira septentrionalis	Northern Cat-eyed Snake	Reptile	1	Waning Crescent (16.5% Full)	Dark	Dry	7:50 - 10:25	01:48:00	14:26:00	0
June	2015	2015-06-21	Leptodeira septentrionalis	Northern Cat-eyed Snake	Reptile	1	Waxing Crescent (26.3% Full)	Dark	Dry	8:00 - 10:00	09:33:00	22:04:00	2
June	2015	2015-06-24	Leptodeira septentrionalis	Northern Cat-eyed Snake	Reptile	1	First Quarter (53.6% Full)	Dark	Dry	7:30 - 10:25	11:48:00	-	3
June	2015	2015-06-25	Leptodeira septentrionalis	Northern Cat-eyed Snake	Reptile	1	Waxing Gibbous (62.7% Full)	Semi-bright	Dry	6:15 - 8:45	12:33:00	00:05:00	2.5
July	2015	2015-07-08	Leptodeira septentrionalis	Northern Cat-eyed Snake	Reptile	1	Last Quarter (50.1% Full)	Dark	Dry	7:30 - 10:30	23:46:00	11:27:00	3
July	2015	2015-07-10	Siphlophis compressus	Red-eyed Tree Snake	Reptile	1	Waning Crescent (28.2% Full)	Dark	Light Rain	7:30 - 10:15	00:36:00	13:16:00	2.75
July	2015	2015-07-12	Imantodes cenchoa	Chunk-headed Snake	Reptile	1	Waning Crescent (11.1% Full)	Dark	Light Rain	7:30 - 10:30	02:18:00	15:07:00	3
July	2015	2015-07-13	Imantodes cenchoa	Chunk-headed Snake	Reptile	1	Waning Crescent (5.6% Full)	Dark	Dry	6:00 - 8:00	03:11:00	16:01:00	2
July	2015	2015-07-13	Leptodeira septentrionalis	Northern Cat-eyed Snake	Reptile	1	Waning Crescent (5.6% Full)	Dark	Dry	6:00 - 8:00	03:11:00	16:01:00	0
July	2015	2015-07-13	Imantodes cenchoa	Chunk-headed Snake	Reptile	1	Waning Crescent (5.1% Full)	Dark	Dry	8:00 - 10:00	03:11:00	16:01:00	2
July	2015	2015-07-14	Imantodes cenchoa	Chunk-headed Snake	Reptile	1	Waning Crescent (1.5% Full)	Dark	Dry	7:30 - 10:40	04:04:00	16:54:00	3
July	2015	2015-07-17	Leptodeira septentrionalis	Northern Cat-eyed Snake	Reptile	1	Waxing Crescent (3% Full)	Dark	Light Rain	6:00 - 8:00	06:39:00	19:17:00	2
July	2015	2015-07-17	Imantodes cenchoa	Chunk-headed Snake	Reptile	1	Waxing Crescent (3.3% Full)	Dark	Dry	7:30 - 10:20	06:39:00	19:17:00	3
July	2015	2015-07-18	Leptodeira septentrionalis	Northern Cat-eyed Snake	Reptile	2	Waxing Crescent (7.5% Full)	Dark	Dry	7:30 - 10:20	07:27:00	20:00:00	3
July	2015	2015-07-25	Enuliophis sclateri	Sock-headed Snake	Reptile	1	Waxing Gibbous (66.3% Full)	Semi-bright	Dry	7:30 - 10:20	12:49:00	00:07:00	0
July	2015	2015-07-25	Leptodeira septentrionalis	Northern Cat-eyed Snake	Reptile	1	Waxing Gibbous (66.3% Full)	Semi-bright	Dry	7:30 - 10:20	12:49:00	00:07:00	3
July	2015	2015-07-26	Imantodes cenchoa	Chunk-headed Snake	Reptile	1	Waxing Gibbous (75.7% Full)	Semi-bright	Dry	7:15 - 9:30	13:40:00	00:53:00	2.25
August	2015	2015-08-01	Siphlophis compressus	Red-eyed Tree Snake	Reptile	1	Waning Gibbous (97.1% Full)	Bright	Dry	7:30 - 10:30	19:10:00	06:28:00	0
August	2015	2015-08-03	Imantodes cenchoa	Chunk-headed Snake	Reptile	1	Waning Gibbous (84.8% Full)	Dark	Dry	5:30 - 7:55	20:53:00	08:24:00	2.5
August	2015	2015-08-03	Imantodes cenchoa	Chunk-headed Snake	Reptile	2	Waning Gibbous (83.8% Full)	Dark	Dry	8:00 - 9:45	20:53:00	08:24:00	2.75
August	2015	2015-08-04	Leptodeira septentrionalis	Northern Cat-eyed Snake	Reptile	1	Waning Gibbous (74.5% Full)	Dark	Dry	7:30 - 10:20	21:43:00	09:20:00	3
August	2015	2015-08-07	Leptodeira septentrionalis	Northern Cat-eyed Snake	Reptile	1	Waning Crescent (41.5% Full)	Dark	Light Rain	7:30 - 10:40	-	12:07:00	3
August	2015	2015-08-12	Imantodes cenchoa	Chunk-headed Snake	Reptile	1	Waning Crescent (3% Full)	Dark	Dry	7:30 - 10:30	03:43:00	16:28:00	3
August	2015	2015-08-13	Imantodes cenchoa	Chunk-headed Snake	Reptile	2	Waning Crescent (0.7% Full)	Dark	Rainy	6:00 - 7:15	04:33:00	17:14:00	2.25
August	2015	2015-08-13	Leptodeira septentrionalis	Northern Cat-eyed Snake	Reptile	1	Waning Crescent (0.7% Full)	Dark	Rainy	6:00 - 7:15	04:33:00	17:14:00	0
August	2015	2015-08-14	Imantodes cenchoa	Chunk-headed Snake	Reptile	1	New Moon (0% Full)	Dark	Dry	7:30 - 10:15	05:22:00	17:57:00	2.75
August	2015	2015-08-17	Imantodes cenchoa	Chunk-headed Snake	Reptile	1	Waxing Crescent (9.3% Full)	Dark	Dry	7:30 - 10:20	07:39:00	20:00:00	0
August	2015	2015-08-17	Leptodeira septentrionalis	Northern Cat-eyed Snake	Reptile	1	Waxing Crescent (9.3% Full)	Dark	Dry	7:30 - 10:20	07:39:00	20:00:00	3
August	2015	2015-08-18	Leptodeira septentrionalis	Northern Cat-eyed Snake	Reptile	1	Waxing Crescent (15.5% Full)	Dark	Light Rain	7:30 - 10:30	08:24:00	20:40:00	3
August	2015	2015-08-18	Mastigodryas melanolomus	Neotropical Racer	Reptile	1	Waxing Crescent (15.5% Full)	Dark	Light Rain	7:30 - 10:30	08:24:00	20:40:00	0
August	2015	2015-08-22	Leptodeira septentrionalis	Northern Cat-eyed Snake	Reptile	1	First Quarter (50.5% Full)	Dark	Rainy	7:30 - 10:30	11:31:00	23:33:00	3
August	2015	2015-08-23	Leptodeira septentrionalis	Northern Cat-eyed Snake	Reptile	1	Waxing Gibbous (60.6% Full)	Dark	Dry	7:30 - 10:30	12:22:00	-	3
August	2015	2015-08-24	Enuliophis sclateri	Sock-headed Snake	Reptile	1	Waxing Gibbous (70.8% Full)	Dark	Light Rain	7:45 - 10:15	13:15:00	00:23:00	2.5
August	2015	2015-08-26	Imantodes cenchoa	Chunk-headed Snake	Reptile	1	Waxing Gibbous (88% Full)	Semi-bright	Dry	7:30 - 10:15	15:05:00	02:12:00	2.75
August	2015	2015-08-27	Siphlophis compressus	Red-eyed Tree Snake	Reptile	1	Waxing Gibbous (94.6% Full)	Bright	Dry	7:30 - 10:30	16:00:00	03:11:00	3
September	2015	2015-09-01	Leptodeira septentrionalis	Northern Cat-eyed Snake	Reptile	2	Waning Gibbous (86.4% Full)	Dark	Dry	7:30 - 10:30	20:26:00	08:05:00	3
September	2015	2015-09-05	Leptodeira septentrionalis	Northern Cat-eyed Snake	Reptile	1	Last Quarter (45.2% Full)	Dark	Dry	7:30 - 10:15	23:57:00	11:52:00	2.75
September	2015	2015-09-07	Leptodeira septentrionalis	Northern Cat-eyed Snake	Reptile	1	Waning Crescent (25.6% Full)	Dark	Light Rain	7:30 - 10:30	00:49:00	13:37:00	3
September	2015	2015-09-11	Leptodeira septentrionalis	Northern Cat-eyed Snake	Reptile	1	Waning Crescent (1.8% Full)	Dark	Light Rain	7:30 - 10:15	04:06:00	16:38:00	2.75
September	2015	2015-09-11	Mastigodryas melanolomus	Neotropical Racer	Reptile	1	Waning Crescent (1.8% Full)	Dark	Light Rain	7:30 - 10:15	04:06:00	16:38:00	0
September	2015	2015-09-12	Enuliophis sclateri	Sock-headed Snake	Reptile	1	Waning Crescent (0.1% Full)	Dark	Dry	7:30 - 10:30	04:52:00	17:19:00	3
September	2015	2015-09-14	Leptodeira septentrionalis	Northern Cat-eyed Snake	Reptile	1	Waxing Crescent (2.3% Full)	Dark	Dry	7:30 - 10:15	06:21:00	18:39:00	0
September	2015	2015-09-14	Mastigodryas melanolomus	Neotropical Racer	Reptile	1	Waxing Crescent (2.3% Full)	Dark	Dry	7:30 - 10:15	06:21:00	18:39:00	2.75
September	2015	2015-09-18	Imantodes cenchoa	Chunk-headed Snake	Reptile	1	Waxing Crescent (25.7% Full)	Dark	Dry	7:30 - 10:30	09:26:00	21:29:00	3
September	2015	2015-09-19	Enuliophis sclateri	Sock-headed Snake	Reptile	1	Waxing Crescent (34.8% Full)	Dark	Dry	7:30 - 10:30	10:15:00	22:17:00	3
September	2015	2015-09-20	Leptodeira septentrionalis	Northern Cat-eyed Snake	Reptile	1	Waxing Crescent (44.7% Full)	Dark	Light Rain	7:30 - 10:30	11:06:00	23:07:00	0
September	2015	2015-09-24	Imantodes cenchoa	Chunk-headed Snake	Reptile	1	Waxing Gibbous (84.9% Full)	Semi-bright	Dry	7:30 - 10:30	14:39:00	01:52:00	0
September	2015	2015-09-24	Leptodeira septentrionalis	Northern Cat-eyed Snake	Reptile	1	Waxing Gibbous (84.9% Full)	Semi-bright	Dry	7:30 - 10:30	14:39:00	01:52:00	3
November	2015	2015-11-04	Leptodeira septentrionalis	Northern Cat-eyed Snake	Reptile	3	Waning Crescent (37.4% Full)	Dark	Dry	7:30 - 10:15	-	12:36:00	2.75
November	2015	2015-11-06	Leptodeira septentrionalis	Northern Cat-eyed Snake	Reptile	1	Waning Crescent (20.3% Full)	Dark	Light Rain	7:30 - 10:15	01:32:00	13:58:00	0
November	2015	2015-11-11	Leptodeira septentrionalis	Northern Cat-eyed Snake	Reptile	1	New Moon (0% Full)	Dark	Dry	7:30 - 10:30	05:20:00	17:24:00	3
November	2015	2015-11-13	Enuliophis sclateri	Sock-headed Snake	Reptile	1	Waxing Crescent (4.4% Full)	Dark	Light Rain	7:30 - 10:30	06:58:00	19:00:00	3
November	2015	2015-11-23	Leptodeira septentrionalis	Northern Cat-eyed Snake	Reptile	1	Waxing Gibbous (93.9% Full)	Bright	Dry	7:30 - 10:15	15:27:00	03:09:00	2.75
November	2015	2015-11-26	Enuliophis sclateri	Sock-headed Snake	Reptile	1	Waning Gibbous (98.8% Full)	Bright	Dry	7:30 - 10:30	18:14:00	06:06:00	3
November	2015	2015-11-29	Enuliophis sclateri	Sock-headed Snake	Reptile	1	Waning Gibbous (81.9% Full)	Dark	Light Rain	7:30 - 10:15	21:00:00	08:55:00	2.75
November	2015	2015-11-29	Leptodeira septentrionalis	Northern Cat-eyed Snake	Reptile	1	Waning Gibbous (81.9% Full)	Dark	Light Rain	7:30 - 10:15	21:00:00	08:55:00	0
November	2015	2015-11-29	Leptodeira septentrionalis	Northern Cat-eyed Snake	Reptile	1	Waning Gibbous (81.9% Full)	Dark	Light Rain	7:30 - 10:15	21:00:00	08:55:00	0
November	2015	2015-11-29	Siphlophis compressus	Red-eyed Tree Snake	Reptile	1	Waning Gibbous (81.9% Full)	Dark	Light Rain	7:30 - 10:15	21:00:00	08:55:00	0
November	2015	2015-11-30	Leptodeira septentrionalis	Northern Cat-eyed Snake	Reptile	2	Waning Gibbous (73.4% Full)	Dark	Dry	7:30 - 10:30	21:51:00	09:44:00	3
November	2015	2015-11-30	Mastigodryas melanolomus	Neotropical Racer	Reptile	1	Waning Gibbous (73.4% Full)	Dark	Dry	7:30 - 10:30	21:51:00	09:44:00	0
December	2015	2015-12-01	Enuliophis sclateri	Sock-headed Snake	Reptile	1	Waning Gibbous (65% Full)	Dark	Dry	5:30 - 8:00	22:40:00	10:30:00	2.5
December	2015	2015-12-02	Mastigodryas melanolomus	Neotropical Racer	Reptile	1	Waning Gibbous (54.7% Full)	Dark	Dry	7:30 - 10:15	23:13:00	11:27:00	2.75
December	2015	2015-12-04	Enuliophis sclateri	Sock-headed Snake	Reptile	1	Waning Crescent (35.9% Full)	Dark	Dry	7:30 - 10:30	00:12:00	12:35:00	3
December	2015	2015-12-07	Leptodeira septentrionalis	Northern Cat-eyed Snake	Reptile	1	Waning Crescent (12.2% Full)	Dark	Dry	7:30 - 10:30	02:27:00	14:36:00	3
December	2015	2015-12-09	Enuliophis sclateri	Sock-headed Snake	Reptile	1	Waning Crescent (2.4% Full)	Dark	Dry	7:30 - 10:40	04:02:00	16:05:00	3
December	2015	2015-12-09	Imantodes cenchoa	Chunk-headed Snake	Reptile	1	Waning Crescent (2.4% Full)	Dark	Dry	7:30 - 10:40	04:02:00	16:05:00	0
December	2015	2015-12-09	Leptodeira septentrionalis	Northern Cat-eyed Snake	Reptile	1	Waning Crescent (2.4% Full)	Dark	Dry	7:30 - 10:40	04:02:00	16:05:00	0
December	2015	2015-12-10	Leptodeira septentrionalis	Northern Cat-eyed Snake	Reptile	1	Waning Crescent (0.4% Full)	Dark	Dry	6:00 - 8:00	04:52:00	16:54:00	2
December	2015	2015-12-10	Imantodes cenchoa	Chunk-headed Snake	Reptile	1	Waning Crescent (0.4% Full)	Dark	Dry	7:30 - 10:40	04:52:00	16:54:00	3.25
December	2015	2015-12-10	Leptodeira septentrionalis	Northern Cat-eyed Snake	Reptile	1	Waning Crescent (0.4% Full)	Dark	Dry	7:30 - 10:40	04:52:00	16:54:00	0
December	2015	2015-12-14	Leptodeira septentrionalis	Northern Cat-eyed Snake	Reptile	1	Waxing Crescent (12.6% Full)	Dark	Dry	7:30 - 10:30	08:22:00	20:27:00	3
December	2015	2015-12-18	Mastigodryas melanolomus	Neotropical Racer	Reptile	1	First Quarter (52.7% Full)	Dark	Dry	8:00 - 10:15	11:40:00	-	2.25
December	2015	2015-12-23	Imantodes cenchoa	Chunk-headed Snake	Reptile	1	Waxing Gibbous (96.8% Full)	Bright	Dry	7:30 - 10:30	15:59:00	03:51:00	3
December	2015	2015-12-24	Imantodes cenchoa	Chunk-headed Snake	Reptile	1	Waxing Gibbous (99.5% Full)	Bright	Dry	7:30 - 10:20	4:55PM	04:49:00	3
December	2015	2015-12-25	Imantodes cenchoa	Chunk-headed Snake	Reptile	1	Full Moon (99.8% Full)	Bright	Dry	5:30 - 8:00	5:51PM	05:47:00	2.5
December	2015	2015-12-25	Imantodes cenchoa	Chunk-headed Snake	Reptile	1	Full Moon (99.7% Full)	Bright	Dry	7:30 - 10:15	5:51PM	05:47:00	2.75
December	2015	2015-12-28	Leptodeira septentrionalis	Northern Cat-eyed Snake	Reptile	1	Waning Gibbous (87.8% Full)	Dark	Dry	6:00 - 8:00	20:30:00	08:21:00	2
December	2015	2015-12-28	Leptodeira septentrionalis	Northern Cat-eyed Snake	Reptile	1	Waning Gibbous (87.2% Full)	Dark	Dry	8:00 - 10:15	20:30:00	08:21:00	0
December	2015	2015-12-29	Leptodeira septentrionalis	Northern Cat-eyed Snake	Reptile	1	Waning Gibbous (80% Full)	Dark	Light Rain	7:30 - 10:30	21:19:00	09:07:00	3
January	2016	2016-01-01	Leptodeira septentrionalis	Northern Cat-eyed Snake	Reptile	1	Last Quarter (53.6% Full)	Dark	Dry	7:30 - 10:15	23:35:00	11:11:00	2.75
January	2016	2016-01-02	Imantodes cenchoa	Chunk-headed Snake	Reptile	1	Waning Crescent (44.9% Full)	Dark	Dry	5:30 - 7:55	-	11:51:00	0
January	2016	2016-01-02	Leptodeira septentrionalis	Northern Cat-eyed Snake	Reptile	1	Waning Crescent (44.9% Full)	Dark	Dry	5:30 - 7:55	-	11:51:00	2.5
January	2016	2016-01-03	Leptodeira septentrionalis	Northern Cat-eyed Snake	Reptile	1	Waning Crescent (34.9% Full)	Dark	Dry	7:30 - 10:15	00:20:00	12:31:00	2.75
January	2016	2016-01-04	Enuliophis sclateri	Sock-headed Snake	Reptile	1	Waning Crescent (26.1% Full)	Dark	Dry	7:30 - 10:30	01:06:00	13:14:00	3
January	2016	2016-01-04	Enuliophis sclateri	Sock-headed Snake	Reptile	1	Waning Crescent (26.1% Full)	Dark	Dry	7:30 - 10:30	01:06:00	13:14:00	0
January	2016	2016-01-11	Leptodeira septentrionalis	Northern Cat-eyed Snake	Reptile	1	Waxing Crescent (3.9% Full)	Dark	Dry	7:30 - 10:30	07:07:00	19:15:00	3
January	2016	2016-01-21	Leptodeira septentrionalis	Northern Cat-eyed Snake	Reptile	1	Waxing Gibbous (94.5% Full)	Semi-bright	Dry	7:30 - 10:15	15:41:00	03:36:00	2.75
January	2016	2016-01-22	Leptodeira septentrionalis	Northern Cat-eyed Snake	Reptile	1	Waxing Gibbous (98.4% Full)	Bright	Dry	7:30 - 10:15	16:35:00	04:31:00	2.75
January	2016	2016-01-25	Imantodes cenchoa	Chunk-headed Snake	Reptile	1	Waning Gibbous (96.7% Full)	Dark	Dry	7:30 - 10:30	19:10:00	06:59:00	3
January	2016	2016-01-25	Leptodeira septentrionalis	Northern Cat-eyed Snake	Reptile	1	Waning Gibbous (96.7% Full)	Dark	Dry	7:30 - 10:30	19:10:00	06:59:00	0
January	2016	2016-01-30	Enuliophis sclateri	Sock-headed Snake	Reptile	1	Waning Gibbous (61.8% Full)	Dark	Dry	8:00 - 10:00	22:59:00	10:26:00	2
February	2016	2016-02-01	Leptodeira septentrionalis	Northern Cat-eyed Snake	Reptile	1	Waning Crescent (43.2% Full)	Dark	Dry	7:30 - 10:25	-	11:51:00	3
February	2016	2016-02-02	Imantodes cenchoa	Chunk-headed Snake	Reptile	1	Waning Crescent (33.8% Full)	Dark	Dry	7:30 - 10:20	00:32:00	12:36:00	3
February	2016	2016-02-04	Enuliophis sclateri	Sock-headed Snake	Reptile	1	Waning Crescent (16.5% Full)	Dark	Dry	7:30 - 10:30	02:13:00	14:14:00	3
February	2016	2016-02-06	Imantodes cenchoa	Chunk-headed Snake	Reptile	1	Waning Crescent (4.1% Full)	Dark	Dry	7:30 - 10:20	04:00:00	16:04:00	3
February	2016	2016-02-06	Leptodeira septentrionalis	Northern Cat-eyed Snake	Reptile	1	Waning Crescent (4.1% Full)	Dark	Dry	7:30 - 10:20	04:00:00	16:04:00	0
February	2016	2016-02-06	Leptodeira septentrionalis	Northern Cat-eyed Snake	Reptile	1	Waning Crescent (4.1% Full)	Dark	Dry	7:30 - 10:20	04:00:00	16:04:00	0
February	2016	2016-02-06	Siphlophis compressus	Red-eyed Tree Snake	Reptile	1	Waning Crescent (4.1% Full)	Dark	Dry	7:30 - 10:20	04:00:00	16:04:00	0
February	2016	2016-02-07	Siphlophis compressus	Red-eyed Tree Snake	Reptile	1	Waning Crescent (0.7% Full)	Dark	Dry	7:30 - 10:20	04:54:00	17:01:00	3
February	2016	2016-02-09	Leptodeira septentrionalis	Northern Cat-eyed Snake	Reptile	2	Waxing Crescent (2.1% Full)	Dark	Dry	7:30 - 10:00	06:40:00	18:56:00	2.5
February	2016	2016-02-10	Leptodeira septentrionalis	Northern Cat-eyed Snake	Reptile	1	Waxing Crescent (6.8% Full)	Dark	Dry	7:30 - 10:25	07:32:00	19:53:00	3
February	2016	2016-02-11	Leptodeira septentrionalis	Northern Cat-eyed Snake	Reptile	1	Waxing Crescent (13.9% Full)	Dark	Dry	7:30 - 10:30	08:22:00	20:49:00	3
February	2016	2016-02-16	Enuliophis sclateri	Sock-headed Snake	Reptile	1	Waxing Gibbous (66.9% Full)	Semi-bright	Dry	8:00 - 10:00	12:41:00	00:35:00	2
February	2016	2016-02-18	Leptodeira septentrionalis	Northern Cat-eyed Snake	Reptile	1	Waxing Gibbous (84.8% Full)	Bright	Dry	7:30 - 10:20	14:29:00	02:25:00	2.75
February	2016	2016-02-22	Enuliophis sclateri	Sock-headed Snake	Reptile	1	Full Moon (100% Full)	Bright	Dry	7:30 - 10:15	17:51:00	05:39:00	2.75
March	2016	2016-03-01	Leptodeira septentrionalis	Northern Cat-eyed Snake	Reptile	1	Last Quarter (51.1% Full)	Dark	Dry	7:30 - 10:30	-	11:15:00	0
March	2016	2016-03-01	Siphlophis compressus	Red-eyed Tree Snake	Reptile	1	Last Quarter (51.1% Full)	Dark	Dry	7:30 - 10:30	-	11:15:00	0
March	2016	2016-03-03	Leptodeira septentrionalis	Northern Cat-eyed Snake	Reptile	1	Waning Crescent (32.1% Full)	Dark	Dry	6:00 - 7:30	00:54:00	12:55:00	2.5
March	2016	2016-03-04	Leptodeira septentrionalis	Northern Cat-eyed Snake	Reptile	1	Waning Crescent (22.2% Full)	Dark	Dry	7:30 - 10:30	01:46:00	13:48:00	3
March	2016	2016-03-05	Enuliophis sclateri	Sock-headed Snake	Reptile	1	Waning Crescent (13.6% Full)	Dark	Light Rain	7:30 - 10:30	02:39:00	14:44:00	0
March	2016	2016-03-05	Leptodeira septentrionalis	Northern Cat-eyed Snake	Reptile	1	Waning Crescent (13.6% Full)	Dark	Light Rain	7:30 - 10:30	02:39:00	14:44:00	0
March	2016	2016-03-11	Enuliophis sclateri	Sock-headed Snake	Reptile	1	Waxing Crescent (11.4% Full)	Dark	Dry	8:00 - 10:00	07:54:00	20:32:00	2
March	2016	2016-03-12	Imantodes cenchoa	Chunk-headed Snake	Reptile	1	Waxing Crescent (19.6% Full)	Dark	Dry	7:30 - 10:30	08:48:00	21:30:00	3
March	2016	2016-03-18	Imantodes cenchoa	Chunk-headed Snake	Reptile	1	Waxing Gibbous (80.9% Full)	Dark	Dry	8:00 - 10:00	14:10:00	02:04:00	2
March	2016	2016-03-18	Leptodeira septentrionalis	Northern Cat-eyed Snake	Reptile	1	Waxing Gibbous (80.9% Full)	Dark	Dry	8:00 - 10:00	14:10:00	02:04:00	0
March	2016	2016-03-20	Leptodeira septentrionalis	Northern Cat-eyed Snake	Reptile	1	Waxing Gibbous (93.6% Full)	Semi-bright	Light Rain	7:30 - 10:30	15:48:00	03:37:00	3
March	2016	2016-03-23	Leptodeira septentrionalis	Northern Cat-eyed Snake	Reptile	1	Full Moon (100% Full)	Semi-bright	Dry	7:30 - 10:30	18:05:00	05:42:00	3
March	2016	2016-03-24	Leptodeira septentrionalis	Northern Cat-eyed Snake	Reptile	1	Waning Gibbous (98.2% Full)	Semi-bright	Dry	7:30 - 10:15	18:50:00	06:22:00	2.75
March	2016	2016-03-26	Leptodeira septentrionalis	Northern Cat-eyed Snake	Reptile	1	Waning Gibbous (90% Full)	Dark	Dry	8:00 - 10:00	20:21:00	07:44:00	2
March	2016	2016-03-28	Imantodes cenchoa	Chunk-headed Snake	Reptile	1	Waning Gibbous (76.3% Full)	Dark	Dry	7:30 - 10:15	21:56:00	09:11:00	0
March	2016	2016-03-28	Leptodeira septentrionalis	Northern Cat-eyed Snake	Reptile	2	Waning Gibbous (76.3% Full)	Dark	Dry	7:30 - 10:15	21:56:00	09:11:00	0
March	2016	2016-03-30	Enuliophis sclateri	Sock-headed Snake	Reptile	1	Waning Gibbous (57.8% Full)	Dark	Dry	8:00 - 10:00	23:36:00	10:46:00	2
April	2016	2016-04-02	Leptodeira septentrionalis	Northern Cat-eyed Snake	Reptile	1	Waning Crescent (27.4% Full)	Dark	Dry	7:30 - 10:30	01:19:00	13:25:00	3
April	2016	2016-04-03	Imantodes cenchoa	Chunk-headed Snake	Reptile	2	Waning Crescent (17.7% Full)	Dark	Dry	8:00 - 10:00	02:11:00	14:21:00	2
April	2016	2016-04-05	Imantodes cenchoa	Chunk-headed Snake	Reptile	1	Waning Crescent (3.9% Full)	Dark	Dry	7:30 - 10:15	03:54:00	16:16:00	2.75
April	2016	2016-04-05	Leptodeira septentrionalis	Northern Cat-eyed Snake	Reptile	1	Waning Crescent (3.9% Full)	Dark	Dry	7:30 - 10:15	03:54:00	16:16:00	0
April	2016	2016-04-06	Enuliophis sclateri	Sock-headed Snake	Reptile	1	Waning Crescent (0.5% Full)	Dark	Dry	7:30 - 10:45	04:46:00	17:14:00	3.25
April	2016	2016-04-06	Imantodes cenchoa	Chunk-headed Snake	Reptile	1	Waning Crescent (0.5% Full)	Dark	Dry	7:30 - 10:45	04:46:00	17:14:00	0
April	2016	2016-04-06	Leptodeira septentrionalis	Northern Cat-eyed Snake	Reptile	1	Waning Crescent (0.5% Full)	Dark	Dry	7:30 - 10:45	04:46:00	17:14:00	0
April	2016	2016-04-06	Leptodeira septentrionalis	Northern Cat-eyed Snake	Reptile	1	Waning Crescent (0.5% Full)	Dark	Dry	7:30 - 10:45	04:46:00	17:14:00	0
April	2016	2016-04-06	Mastigodryas melanolomus	Neotropical Racer	Reptile	1	Waning Crescent (0.5% Full)	Dark	Dry	7:30 - 10:45	04:46:00	17:14:00	0
April	2016	2016-04-09	Leptodeira septentrionalis	Northern Cat-eyed Snake	Reptile	1	Waxing Crescent (8% Full)	Dark	Dry	5:30 - 8:30	07:28:00	20:14:00	3
April	2016	2016-04-10	Enuliophis sclateri	Sock-headed Snake	Reptile	1	Waxing Crescent (15.7% Full)	Dark	Dry	6:00 - 8:00	08:25:00	21:14:00	0
April	2016	2016-04-10	Imantodes cenchoa	Chunk-headed Snake	Reptile	1	Waxing Crescent (15.7% Full)	Dark	Dry	6:00 - 8:00	08:25:00	21:14:00	2
April	2016	2016-04-10	Imantodes cenchoa	Chunk-headed Snake	Reptile	1	Waxing Crescent (16.5% Full)	Dark	Dry	8:00 - 10:00	08:25:00	21:14:00	2
April	2016	2016-04-12	Imantodes cenchoa	Chunk-headed Snake	Reptile	1	Waxing Crescent (35.9% Full)	Dark	Dry	7:30 - 10:30	10:18:00	23:08:00	0
April	2016	2016-04-12	Mastigodryas melanolomus	Neotropical Racer	Reptile	1	Waxing Crescent (35.9% Full)	Dark	Dry	7:30 - 10:30	10:18:00	23:08:00	3
April	2016	2016-04-13	Imantodes cenchoa	Chunk-headed Snake	Reptile	1	First Quarter (46.5% Full)	Dark	Dry	7:30 - 10:45	11:13:00	-	3.25
April	2016	2016-04-24	Leptodeira septentrionalis	Northern Cat-eyed Snake	Reptile	1	Waning Gibbous (93.8% Full)	Dark	Dry	7:30 - 10:15	19:54:00	07:09:00	2.75
April	2016	2016-04-29	Imantodes cenchoa	Chunk-headed Snake	Reptile	1	Last Quarter (53.2% Full)	Dark	Light Rain	7:30 - 10:30	-	11:16:00	3
June	2016	2016-06-01	Leptodeira septentrionalis	Northern Cat-eyed Snake	Reptile	1	Waning Crescent (15% Full)	Dark	Dry	7:30 - 10:30	02:04:00	14:37:00	3
June	2016	2016-06-03	Leptodeira septentrionalis	Northern Cat-eyed Snake	Reptile	2	Waning Crescent (2.3% Full)	Dark	Dry	7:30 - 10:20	03:50:00	16:36:00	3
June	2016	2016-06-03	Mastigodryas melanolomus	Neotropical Racer	Reptile	1	Waning Crescent (2.3% Full)	Dark	Dry	7:30 - 10:20	03:50:00	16:36:00	0
June	2016	2016-06-04	Leptodeira septentrionalis	Northern Cat-eyed Snake	Reptile	1	New Moon (0% Full)	Dark	Dry	7:30 - 10:15	04:47:00	17:38:00	2.75
June	2016	2016-06-04	Leptodeira septentrionalis	Northern Cat-eyed Snake	Reptile	1	New Moon (0% Full)	Dark	Dry	7:30 - 10:15	04:47:00	17:38:00	0
June	2016	2016-06-10	Imantodes cenchoa	Chunk-headed Snake	Reptile	1	Waxing Crescent (35.6% Full)	Dark	Light Rain	7:30 - 10:15	10:23:00	22:56:00	2.75
June	2016	2016-06-14	Imantodes cenchoa	Chunk-headed Snake	Reptile	1	Waxing Gibbous (73.1% Full)	Dark	Light Rain	7:30 - 10:15	13:27:00	00:59:00	2.75
June	2016	2016-06-16	Leptodeira septentrionalis	Northern Cat-eyed Snake	Reptile	1	Waxing Gibbous (88.1% Full)	Semi-bright	Dry	8:00 - 10:00	14:58:00	02:20:00	2
June	2016	2016-06-19	Imantodes cenchoa	Chunk-headed Snake	Reptile	1	Waxing Gibbous (99.7% Full)	Semi-bright	Light Rain	8:00 - 10:00	17:24:00	04:35:00	2
June	2016	2016-06-23	Enuliophis sclateri	Sock-headed Snake	Reptile	1	Waning Gibbous (88% Full)	Dark	Dry	8:00 - 11:00	20:47:00	08:02:00	0
June	2016	2016-06-23	Leptodeira septentrionalis	Northern Cat-eyed Snake	Reptile	1	Waning Gibbous (88% Full)	Dark	Dry	8:00 - 11:00	20:47:00	08:02:00	3
June	2016	2016-06-29	Leptodeira septentrionalis	Northern Cat-eyed Snake	Reptile	1	Waning Crescent (26.8% Full)	Dark	Dry	7:30 - 10:15	00:48:00	13:25:00	2.75
June	2016	2016-06-29	Leptodeira septentrionalis	Northern Cat-eyed Snake	Reptile	1	Waning Crescent (26.8% Full)	Dark	Dry	7:30 - 10:15	00:48:00	13:25:00	2.75
July	2016	2016-07-08	Leptodeira septentrionalis	Northern Cat-eyed Snake	Reptile	1	Waxing Crescent (21.1% Full)	Dark	Dry	8:00 - 11:00	09:03:00	21:33:00	3
July	2016	2016-07-08	Leptodeira septentrionalis	Northern Cat-eyed Snake	Reptile	1	Waxing Crescent (21.1% Full)	Dark	Dry	8:00 - 11:00	09:03:00	21:33:00	0
July	2016	2016-07-09	Enuliophis sclateri	Sock-headed Snake	Reptile	1	Waxing Crescent (29.6% Full)	Dark	Dry	7:30 - 10:15	09:50:00	22:15:00	2.75
July	2016	2016-07-19	Enuliophis sclateri	Sock-headed Snake	Reptile	1	Full Moon (100% Full)	Semi-bright	Light Rain	7:30 - 10:30	17:51:00	05:01:00	3
July	2016	2016-07-19	Mastigodryas melanolomus	Neotropical Racer	Reptile	1	Full Moon (100% Full)	Semi-bright	Light Rain	7:30 - 10:30	17:51:00	05:01:00	0
July	2016	2016-07-21	Imantodes cenchoa	Chunk-headed Snake	Reptile	1	Waning Gibbous (95.8% Full)	Semi-bright	Dry	7:30 - 10:30	19:32:00	06:49:00	3
July	2016	2016-07-23	Leptodeira septentrionalis	Northern Cat-eyed Snake	Reptile	1	Waning Gibbous (82.5% Full)	Dark	Rainy	7:30 - 10:30	21:09:00	08:37:00	3
July	2016	2016-07-26	Leptodeira septentrionalis	Northern Cat-eyed Snake	Reptile	1	Last Quarter (51.3% Full)	Dark	Dry	7:30 - 10:30	23:36:00	11:20:00	3
July	2016	2016-07-26	Leptodeira septentrionalis	Northern Cat-eyed Snake	Reptile	1	Last Quarter (51.3% Full)	Dark	Dry	7:30 - 10:30	23:36:00	11:20:00	0
July	2016	2016-07-28	Leptodeira septentrionalis	Northern Cat-eyed Snake	Reptile	1	Waning Crescent (28.9% Full)	Dark	Dry	7:30 - 10:15	00:28:00	13:14:00	2.75
July	2016	2016-07-31	Leptodeira septentrionalis	Northern Cat-eyed Snake	Reptile	1	Waning Crescent (4.9% Full)	Dark	Dry	7:30 - 10:30	03:15:00	16:07:00	3
August	2016	2016-08-04	Imantodes cenchoa	Chunk-headed Snake	Reptile	1	Waxing Crescent (4.1% Full)	Dark	Dry	5:30 - 8:00	06:53:00	19:27:00	2.5
August	2016	2016-08-04	Leptodeira septentrionalis	Northern Cat-eyed Snake	Reptile	1	Waxing Crescent (4.5% Full)	Dark	Dry	7:30 - 10:15	06:53:00	19:27:00	2.75
August	2016	2016-08-08	Leptodeira septentrionalis	Northern Cat-eyed Snake	Reptile	1	Waxing Crescent (32.4% Full)	Dark	Light Rain	7:30 - 10:30	10:01:00	22:13:00	3
August	2016	2016-08-10	Leptodeira septentrionalis	Northern Cat-eyed Snake	Reptile	1	First Quarter (50.9% Full)	Dark	Light Rain	7:30 - 10:30	11:33:00	23:37:00	3
August	2016	2016-08-12	Enuliophis sclateri	Sock-headed Snake	Reptile	1	Waxing Gibbous (69.5% Full)	Dark	Dry	7:30 - 10:30	13:08:00	00:22:00	3
August	2016	2016-08-17	Leptodeira septentrionalis	Northern Cat-eyed Snake	Reptile	1	Waxing Gibbous (99.7% Full)	Bright	Dry	7:30 - 10:40	17:23:00	04:38:00	3
August	2016	2016-08-21	Imantodes cenchoa	Chunk-headed Snake	Reptile	1	Waning Gibbous (84.8% Full)	Dark	Rainy	7:30 - 10:30	20:43:00	08:20:00	3
August	2016	2016-08-22	Leptodeira septentrionalis	Northern Cat-eyed Snake	Reptile	1	Waning Gibbous (75.1% Full)	Dark	Dry	7:30 - 10:25	21:34:00	09:15:00	3
August	2016	2016-08-27	Leptodeira septentrionalis	Northern Cat-eyed Snake	Reptile	1	Waning Crescent (21.6% Full)	Dark	Dry	7:30 - 10:40	01:09:00	14:00:00	3
September	2016	2016-09-06	Leptodeira septentrionalis	Northern Cat-eyed Snake	Reptile	1	Waxing Crescent (25.9% Full)	Dark	Dry	7:30 - 10:20	09:27:00	21:33:00	3
September	2016	2016-09-08	Leptodeira septentrionalis	Northern Cat-eyed Snake	Reptile	1	Waxing Crescent (43.8% Full)	Dark	Dry	7:30 - 10:20	11:01:00	23:01:00	3
September	2016	2016-09-18	Imantodes cenchoa	Chunk-headed Snake	Reptile	1	Waning Gibbous (93.9% Full)	Semi-bright	Dry	7:30 - 10:30	19:26:00	07:04:00	3
November	2016	2016-11-06	Imantodes cenchoa	Chunk-headed Snake	Reptile	1	Waxing Crescent (40.1% Full)	Dark	Dry	7:30 - 10:30	10:53:00	22:56:00	3
November	2016	2016-11-07	Imantodes cenchoa	Chunk-headed Snake	Reptile	1	First Quarter (50.4% Full)	Dark	Dry	7:30 - 10:30	11:41:00	23:48:00	3
November	2016	2016-11-13	Leptodeira septentrionalis	Northern Cat-eyed Snake	Reptile	1	Waxing Gibbous (99.3% Full)	Semi-bright	Rainy	7:30 - 10:15	16:42:00	04:24:00	2.75
November	2016	2016-11-15	Leptodeira septentrionalis	Northern Cat-eyed Snake	Reptile	1	Waning Gibbous (97.4% Full)	Dark	Rainy	8:00 - 10:15	18:38:00	06:28:00	2.25
November	2016	2016-11-25	Mastigodryas melanolomus	Neotropical Racer	Reptile	1	Waning Crescent (11.6% Full)	Dark	Light Rain	7:30 - 10:30	02:32:00	14:46:00	3
November	2016	2016-11-30	Leptodeira septentrionalis	Northern Cat-eyed Snake	Reptile	1	Waxing Crescent (1.7% Full)	Dark	Light Rain	7:30 - 10:30	06:24:00	18:23:00	0
December	2016	2016-12-16	Leptodeira septentrionalis	Northern Cat-eyed Snake	Reptile	1	Waning Gibbous (89% Full)	Dark	Dry	7:30 - 10:30	20:17:00	08:10:00	3
December	2016	2016-12-19	Imantodes cenchoa	Chunk-headed Snake	Reptile	1	Waning Gibbous (63.1% Full)	Dark	Dry	5:30 - 7:50	22:55:00	10:39:00	2.25
December	2016	2016-12-21	Imantodes cenchoa	Chunk-headed Snake	Reptile	1	Waning Crescent (42.7% Full)	Dark	Dry	7:30 - 10:30	-	12:04:00	3
December	2016	2016-12-22	Imantodes cenchoa	Chunk-headed Snake	Reptile	1	Waning Crescent (33% Full)	Dark	Dry	8:00 - 10:15	00:28:00	12:44:00	2.25
January	2017	2017-01-01	Leptodeira septentrionalis	Northern Cat-eyed Snake	Reptile	1	Waxing Crescent (12.4% Full)	Dark	Dry	7:30 - 10:00	08:24:00	20:31:00	2.5
January	2017	2017-01-02	Leptodeira septentrionalis	Northern Cat-eyed Snake	Reptile	1	Waxing Crescent (19.3% Full)	Dark	Dry	5:30 - 7:50	09:11:00	21:22:00	2.25
January	2017	2017-01-02	Leptodeira septentrionalis	Northern Cat-eyed Snake	Reptile	1	Waxing Crescent (20.2% Full)	Dark	Dry	7:45 - 10:15	09:11:00	21:22:00	2.5
January	2017	2017-01-15	Leptodeira septentrionalis	Northern Cat-eyed Snake	Reptile	1	Waning Gibbous (86.2% Full)	Dark	Dry	7:30 - 10:30	20:44:00	08:30:00	3
January	2017	2017-01-18	Imantodes cenchoa	Chunk-headed Snake	Reptile	1	Waning Gibbous (60.4% Full)	Dark	Dry	7:30 - 10:40	23:08:00	10:40:00	3
January	2017	2017-01-18	Leptodeira septentrionalis	Northern Cat-eyed Snake	Reptile	1	Waning Gibbous (60.4% Full)	Dark	Dry	7:30 - 10:40	23:08:00	10:40:00	0
January	2017	2017-01-20	Leptodeira septentrionalis	Northern Cat-eyed Snake	Reptile	1	Waning Crescent (41.3% Full)	Dark	Dry	7:30 - 10:30	-	12:02:00	3
January	2017	2017-01-22	Leptodeira septentrionalis	Northern Cat-eyed Snake	Reptile	1	Waning Crescent (23.9% Full)	Dark	Dry	7:30 - 10:30	01:26:00	13:28:00	3
January	2017	2017-01-23	Leptodeira septentrionalis	Northern Cat-eyed Snake	Reptile	1	Waning Crescent (16.2% Full)	Dark	Dry	7:30 - 10:30	02:13:00	14:13:00	3
January	2017	2017-01-26	Leptodeira septentrionalis	Northern Cat-eyed Snake	Reptile	1	Waning Crescent (1.4% Full)	Dark	Dry	7:30 - 10:30	04:41:00	16:41:00	0
January	2017	2017-01-29	Leptodeira septentrionalis	Northern Cat-eyed Snake	Reptile	2	Waxing Crescent (3.8% Full)	Dark	Dry	7:30 - 10:30	07:08:00	19:18:00	3
February	2017	2017-02-02	Leptodeira septentrionalis	Northern Cat-eyed Snake	Reptile	2	Waxing Crescent (35.2% Full)	Dark	Dry	7:30 - 10:30	10:16:00	22:49:00	3
February	2017	2017-02-11	Leptodeira septentrionalis	Northern Cat-eyed Snake	Reptile	2	Waning Gibbous (99.1% Full)	Semi-bright	Dry	7:30 - 10:30	18:31:00	06:18:00	3
February	2017	2017-02-14	Leptodeira septentrionalis	Northern Cat-eyed Snake	Reptile	2	Waning Gibbous (84.6% Full)	Dark	Dry	7:30 - 10:30	20:59:00	08:33:00	3
February	2017	2017-02-20	Leptodeira septentrionalis	Northern Cat-eyed Snake	Reptile	2	Waning Crescent (31.9% Full)	Dark	Dry	5:45 - 7:55	00:53:00	12:53:00	2.25
February	2017	2017-02-20	Imantodes cenchoa	Chunk-headed Snake	Reptile	1	Waning Crescent (31.2% Full)	Dark	Dry	7:30 - 10:30	00:53:00	12:53:00	3
February	2017	2017-02-22	Imantodes cenchoa	Chunk-headed Snake	Reptile	1	Waning Crescent (15.4% Full)	Dark	Dry	6:00 - 7:00	02:31:00	14:31:00	1
February	2017	2017-02-25	Leptodeira septentrionalis	Northern Cat-eyed Snake	Reptile	1	Waning Crescent (0.7% Full)	Dark	Dry	7:30 - 10:30	05:00:00	17:09:00	3
February	2017	2017-02-25	Leptodeira septentrionalis	Northern Cat-eyed Snake	Reptile	1	Waning Crescent (0.7% Full)	Dark	Dry	7:30 - 10:30	05:00:00	17:09:00	0
February	2017	2017-02-27	Leptodeira septentrionalis	Northern Cat-eyed Snake	Reptile	1	Waxing Crescent (1.9% Full)	Dark	Dry	7:30 - 10:30	06:37:00	18:56:00	3
March	2017	2017-03-02	Leptodeira septentrionalis	Northern Cat-eyed Snake	Reptile	1	Waxing Crescent (21.5% Full)	Dark	Dry	7:30 - 10:15	09:02:00	21:40:00	2.75
March	2017	2017-03-03	Imantodes cenchoa	Chunk-headed Snake	Reptile	1	Waxing Crescent (31.6% Full)	Dark	Dry	7:30 - 10:30	09:54:00	22:37:00	0
March	2017	2017-03-03	Leptodeira septentrionalis	Northern Cat-eyed Snake	Reptile	1	Waxing Crescent (31.6% Full)	Dark	Dry	7:30 - 10:30	09:54:00	22:37:00	3
March	2017	2017-03-04	Leptodeira septentrionalis	Northern Cat-eyed Snake	Reptile	1	Waxing Crescent (42.7% Full)	Dark	Dry	7:30 - 10:30	10:47:00	23:35:00	0
March	2017	2017-03-05	Leptodeira septentrionalis	Northern Cat-eyed Snake	Reptile	1	First Quarter (54.1% Full)	Dark	Dry	7:30 - 10:30	11:42:00	-	3
March	2017	2017-03-10	Leptodeira septentrionalis	Northern Cat-eyed Snake	Reptile	2	Waxing Gibbous (96.6% Full)	Bright	Dry	7:30 - 10:30	16:22:00	04:11:00	3
March	2017	2017-03-14	Enuliophis sclateri	Sock-headed Snake	Reptile	1	Waning Gibbous (94.8% Full)	Dark	Dry	7:30 - 10:15	19:38:00	07:10:00	2.75
March	2017	2017-03-16	Leptodeira septentrionalis	Northern Cat-eyed Snake	Reptile	1	Waning Gibbous (83.1% Full)	Dark	Dry	7:30 - 10:30	21:11:00	08:34:00	3
March	2017	2017-03-20	Leptodeira septentrionalis	Northern Cat-eyed Snake	Reptile	1	Last Quarter (48.4% Full)	Dark	Dry	7:30 - 10:45	-	11:32:00	3.25
March	2017	2017-03-23	Mastigodryas melanolomus	Neotropical Racer	Reptile	1	Waning Crescent (20.7% Full)	Dark	Dry	7:30 - 10:15	02:00:00	14:03:00	2.75
March	2017	2017-03-27	Mastigodryas melanolomus	Neotropical Racer	Reptile	1	New Moon (0.1% Full)	Dark	Dry	8:00 - 10:00	05:15:00	17:38:00	2
March	2017	2017-03-30	Enuliophis sclateri	Sock-headed Snake	Reptile	1	Waxing Crescent (10.5% Full)	Dark	Dry	8:00 - 10:00	07:47:00	20:29:00	2
March	2017	2017-03-31	Mastigodryas melanolomus	Neotropical Racer	Reptile	1	Waxing Crescent (18.5% Full)	Dark	Dry	7:30 - 10:15	08:41:00	21:28:00	2.75
April	2017	2017-04-05	Leptodeira septentrionalis	Northern Cat-eyed Snake ( neonate )	Reptile	1	Waxing Gibbous (72% Full)	Semi-bright	Dry	7:30 - 10:15	13:24:00	01:17:00	2.75
April	2017	2017-04-10	Mastigodryas melanolomus	Neotropical Racer	Reptile	1	Waxing Gibbous (99.9% Full)	Bright	Dry	7:30 - 10:15	17:33:00	05:06:00	2.75
April	2017	2017-04-11	Enuliophis sclateri	Sock-headed Snake	Reptile	1	Full Moon (99.6% Full)	Semi-bright	Dry	8:00 - 10:00	18:19:00	05:48:00	2
April	2017	2017-04-16	Leptodeira septentrionalis	Northern Cat-eyed Snake	Reptile	1	Waning Gibbous (73.5% Full)	Dark	Dry	8:00 - 10:15	22:16:00	09:26:00	2.25
April	2017	2017-04-19	Mastigodryas melanolomus	Neotropical Racer	Reptile	1	Last Quarter (45.8% Full)	Dark	Light Rain	7:30 - 10:15	-	11:53:00	2.75
April	2017	2017-04-23	Leptodeira septentrionalis	Northern Cat-eyed Snake	Reptile	1	Waning Crescent (9.7% Full)	Dark	Dry	7:30 - 10:30	03:02:00	15:21:00	3
April	2017	2017-04-24	Leptodeira septentrionalis	Northern Cat-eyed Snake	Reptile	1	Waning Crescent (3.9% Full)	Dark	Dry	7:30 - 10:15	03:50:00	16:16:00	2.75
April	2017	2017-04-27	Mastigodryas melanolomus	Neotropical Racer	Reptile	1	Waxing Crescent (2.7% Full)	Dark	Dry	7:30 - 10:45	06:27:00	19:13:00	3.25
May	2017	2017-05-06	Imantodes cenchoa	Chunk-headed Snake	Reptile	1	Waxing Gibbous (85.1% Full)	Semi-bright	Rainy	7:30 - 10:30	14:43:00	02:23:00	3
May	2017	2017-05-16	Imantodes cenchoa	Chunk-headed Snake	Reptile	1	Waning Gibbous (71% Full)	Dark	Dry	7:30 - 10:30	22:34:00	09:47:00	3
May	2017	2017-05-16	Leptodeira septentrionalis	Northern Cat-eyed Snake	Reptile	1	Waning Gibbous (71% Full)	Dark	Dry	7:30 - 10:30	22:34:00	09:47:00	0
May	2017	2017-05-17	Leptodeira septentrionalis	Northern Cat-eyed Snake	Reptile	1	Waning Gibbous (61.8% Full)	Dark	Dry	7:30 - 10:30	23:21:00	10:36:00	3
May	2017	2017-05-18	Imantodes cenchoa	Chunk-headed Snake	Reptile	1	Last Quarter (51.8% Full)	Dark	Dry	7:30 - 10:30	-	11:26:00	3
May	2017	2017-05-30	Imantodes cenchoa	Chunk-headed Snake	Reptile	1	Waxing Crescent (32.1% Full)	Dark	Light Rain	7:30 - 10:15	10:06:00	22:50:00	2.75
May	2017	2017-05-30	Leptodeira septentrionalis	Northern Cat-eyed Snake	Reptile	1	Waxing Crescent (32.1% Full)	Dark	Light Rain	7:30 - 10:15	10:06:00	22:50:00	0
June	2017	2017-06-01	Imantodes cenchoa	Chunk-headed Snake	Reptile	1	First Quarter (53.3% Full)	Dark	Dry	7:45 - 10:30	11:52:00	-	2.75
June	2017	2017-06-11	Imantodes cenchoa	Chunk-headed Snake	Reptile	1	Waning Gibbous (95.1% Full)	Semi-bright	Dry	8:00 - 10:00	19:45:00	06:55:00	2
June	2017	2017-06-20	Mastigodryas melanolomus	Neotropical Racer	Reptile	1	Waning Crescent (15.3% Full)	Dark	Dry	8:00 - 10:30	01:56:00	14:35:00	2.5
June	2017	2017-06-21	Leptodeira septentrionalis	Northern Cat-eyed Snake	Reptile	1	Waning Crescent (7.7% Full)	Dark	Rainy	7:30 - 10:15	02:49:00	15:35:00	2.75
June	2017	2017-06-22	Imantodes cenchoa	Chunk-headed Snake	Reptile	1	Waning Crescent (2.4% Full)	Dark	Dry	7:30 - 10:30	03:46:00	16:37:00	3
June	2017	2017-06-30	Imantodes cenchoa	Chunk-headed Snake	Reptile	1	First Quarter (48.5% Full)	Dark	Dry	8:00 - 10:00	11:24:00	23:45:00	2
July	2017	2017-07-05	Leptodeira septentrionalis	Northern Cat-eyed Snake	Reptile	1	Waxing Gibbous (90.1% Full)	Bright	Dry	7:30 - 10:15	15:17:00	02:33:00	2.75
July	2017	2017-07-06	Leptodeira septentrionalis	Northern Cat-eyed Snake	Reptile	1	Waxing Gibbous (95.1% Full)	Semi-bright	Light Rain	7:30 - 10:30	16:05:00	03:17:00	3
July	2017	2017-07-06	Mastigodryas melanolomus	Neotropical Racer	Reptile	1	Waxing Gibbous (95.1% Full)	Semi-bright	Light Rain	7:30 - 10:30	16:05:00	03:17:00	0
July	2017	2017-07-10	Leptodeira septentrionalis	Northern Cat-eyed Snake	Reptile	1	Waning Gibbous (97.3% Full)	Semi-bright	Dry	7:30 - 10:30	19:17:00	06:30:00	3
July	2017	2017-07-12	Imantodes cenchoa	Chunk-headed Snake	Reptile	1	Waning Gibbous (87.3% Full)	Dark	Dry	7:30 - 10:30	20:48:00	08:09:00	3
July	2017	2017-07-12	Mastigodryas melanolomus	Neotropical Racer	Reptile	1	Waning Gibbous (87.3% Full)	Dark	Dry	7:30 - 10:30	20:48:00	08:09:00	0
July	2017	2017-07-13	Leptodeira septentrionalis	Northern Cat-eyed Snake	Reptile	1	Waning Gibbous (79.8% Full)	Dark	Dry	7:30 - 10:15	21:33:00	08:59:00	2.75
July	2017	2017-07-24	Leptodeira septentrionalis	Northern Cat-eyed Snake	Reptile	1	Waxing Crescent (2.9% Full)	Dark	Light Rain	7:30 - 10:30	06:33:00	19:18:00	3
July	2017	2017-07-27	Leptodeira septentrionalis	Northern Cat-eyed Snake	Reptile	1	Waxing Crescent (23.3% Full)	Dark	Dry	7:30 - 10:30	09:15:00	21:40:00	3
July	2017	2017-07-29	Imantodes cenchoa	Chunk-headed Snake	Reptile	1	Waxing Crescent (42.2% Full)	Dark	Light Rain	7:30 - 10:15	10:52:00	23:05:00	2.75
July	2017	2017-07-31	Leptodeira septentrionalis	Northern Cat-eyed Snake	Reptile	1	Waxing Gibbous (61.5% Full)	Semi-bright	Dry	7:30 - 10:30	12:26:00	-	3
August	2017	2017-08-03	Leptodeira septentrionalis	Northern Cat-eyed Snake	Reptile	1	Waxing Gibbous (85.9% Full)	Semi-bright	Dry	7:30 - 10:30	14:48:00	01:59:00	3
August	2017	2017-08-06	Mastigodryas melanolomus	Neotropical Racer	Reptile	1	Waxing Gibbous (99.2% Full)	Semi-bright	Rainy	7:30 - 10:30	17:13:00	04:25:00	3
August	2017	2017-08-07	Leptodeira septentrionalis	Northern Cat-eyed Snake	Reptile	2	Full Moon (100% Full)	Semi-bright	Dry	7:30 - 10:15	18:00:00	05:15:00	2.75
August	2017	2017-08-13	Leptodeira septentrionalis	Northern Cat-eyed Snake	Reptile	1	Waning Gibbous (63.5% Full)	Dark	Dry	7:30 - 10:30	22:36:00	10:20:00	3
August	2017	2017-08-13	Mastigodryas melanolomus	Neotropical Racer	Reptile	1	Waning Gibbous (63.5% Full)	Dark	Dry	7:30 - 10:30	22:36:00	10:20:00	0
August	2017	2017-08-18	Imantodes cenchoa	Chunk-headed Snake	Reptile	1	Waning Crescent (11.4% Full)	Dark	Dry	7:30 - 10:30	02:16:00	15:10:00	0
August	2017	2017-08-21	Mastigodryas melanolomus	Neotropical Racer	Reptile	1	New Moon (0% Full)	Dark	Dry	7:30 - 10:30	05:14:00	17:56:00	3
August	2017	2017-08-22	Leptodeira septentrionalis	Northern Cat-eyed Snake	Reptile	1	Waxing Crescent (1.5% Full)	Dark	Dry	7:30 - 10:30	06:10:00	18:45:00	3
August	2017	2017-08-22	Mastigodryas melanolomus	Neotropical Racer	Reptile	1	Waxing Crescent (1.5% Full)	Dark	Dry	7:30 - 10:30	06:10:00	18:45:00	0
November	2017	2017-11-01	Imantodes cenchoa	Chunk-headed Snake	Reptile	1	Waxing Gibbous (92.5% Full)	Bright	Dry	7:30 - 10:30	15:27:00	03:00:00	3
November	2017	2017-11-19	Imantodes cenchoa	Chunk-headed Snake	Reptile	1	Waxing Crescent (1.7% Full)	Dark	Dry	7:30 - 10:30	06:22:00	18:22:00	3
November	2017	2017-11-20	Imantodes cenchoa	Chunk-headed Snake	Reptile	1	Waxing Crescent (5% Full)	Dark	Dry	7:30 - 10:30	07:11:00	19:08:00	3
November	2017	2017-11-21	Imantodes cenchoa	Chunk-headed Snake	Reptile	1	Waxing Crescent (9.9% Full)	Dark	Light Rain	7:30 - 10:30	07:59:00	19:56:00	3
November	2017	2017-11-22	Imantodes cenchoa	Chunk-headed Snake	Reptile	1	Waxing Crescent (16.2% Full)	Dark	Dry	7:30 - 10:30	08:47:00	20:44:00	3
December	2017	2017-12-05	Imantodes cenchoa	Chunk-headed Snake	Reptile	1	Waning Gibbous (93% Full)	Semi-bright	Dry	7:30 - 10:30	19:39:00	07:33:00	3
December	2017	2017-12-08	Imantodes cenchoa	Chunk-headed Snake	Reptile	1	Waning Gibbous (66.1% Full)	Dark	Dry	7:30 - 10:30	22:37:00	10:26:00	0
December	2017	2017-12-08	Leptodeira septentrionalis	Northern Cat-eyed Snake	Reptile	1	Waning Gibbous (66.1% Full)	Dark	Dry	7:30 - 10:30	22:37:00	10:26:00	3
December	2017	2017-12-12	Leptodeira septentrionalis	Northern Cat-eyed Snake	Reptile	1	Waning Crescent (25.4% Full)	Dark	Dry	7:30 - 10:45	01:09:00	13:27:00	3.25
December	2017	2017-12-15	Leptodeira septentrionalis	Northern Cat-eyed Snake	Reptile	1	Waning Crescent (5.3% Full)	Dark	Dry	7:30 - 10:30	03:31:00	15:35:00	3
December	2017	2017-12-23	Imantodes cenchoa	Chunk-headed Snake	Reptile	1	Waxing Crescent (25.7% Full)	Dark	Dry	7:30 - 10:15	09:45:00	21:52:00	2.75
December	2017	2017-12-24	Imantodes cenchoa	Chunk-headed Snake	Reptile	1	Waxing Crescent (34.9% Full)	Dark	Dry	8:00 - 10:00	10:28:00	22:40:00	2
December	2017	2017-12-26	Enuliophis sclateri	Sock-headed Snake	Reptile	1	First Quarter (55.1% Full)	Dark	Dry	7:30 - 10:30	11:55:00	-	5.75
December	2017	2017-12-27	Leptodeira septentrionalis	Northern Cat-eyed Snake	Reptile	1	Waxing Gibbous (64.7% Full)	Dark	Dry	5:30 - 7:50	12:40:00	00:19:00	2.5
December	2017	2017-12-27	Enuliophis sclateri	Sock-headed Snake	Reptile	1	Waxing Gibbous (65.7% Full)	Dark	Dry	7:30 - 10:30	12:40:00	00:19:00	3
December	2017	2017-12-30	Leptodeira septentrionalis	Northern Cat-eyed Snake	Reptile	1	Waxing Gibbous (92.4% Full)	Semi-bright	Dry	7:30 - 10:30	15:15:00	15:05:00	5

## Sheet: tables
Number of sightings based on lunar illumination
Sum of Number Spotted	Column Labels
Row Labels	Bright	Dark	Semi-bright	Grand Total
Boa imperator	7	24	7	38
Bothriechis schlegelii	1	7	5	13
Bothrops asper	2	8	2	12
Chironius flavopictus		2		2
Clelia clelia	1	10	1	12
Coniophanes fissidens		3		3
Corallus ruschenbergerii	1	12	1	14
Dendrophidion percarinatum	2	7	2	11
Enuliophis sclateri	20	86	7	113
Hydrophis platurus		1		1
Imantodes cenchoa	45	226	45	316
Leptodeira septentrionalis	71	633	82	786
Leptophis ahaetulla	6	15	2	23
Leptophis nebulosus		3	1	4
Mastigodryas melanolomus	4	45	18	67
Micrurus alleni	1	3	2	6
Ninia maculata		4		4
Oxyrhopus petolarius		1		1
Phrynonax poecilonotus	3	9	1	13
Rhadinella godmani	1	3	2	6
Sibon nebulatus	1			1
Siphlophis compressus	7	36	6	49
Spilotes pullatus		1		1
Stenorrhina degenhardtii			2	2
Tantilla supracincta			1	1
Grand Total	173	1139	187	1499
Number of sightings based on weather conditions
Sum of Number Spotted	Column Labels
Row Labels	Dry	Light Rain	Rainy	Grand Total
Boa imperator	28	9	1	38
Bothriechis schlegelii	12	1		13
Bothrops asper	11	1		12
Chironius flavopictus	1	1		2
Clelia clelia	10	2		12
Coniophanes fissidens	3			3
Corallus ruschenbergerii	13		1	14
Dendrophidion percarinatum	9	1	1	11
Enuliophis sclateri	100	12	1	113
Hydrophis platurus			1	1
Imantodes cenchoa	263	37	16	316
Leptodeira septentrionalis	644	104	38	786
Leptophis ahaetulla	22	1		23
Leptophis nebulosus	3	1		4
Mastigodryas melanolomus	57	8	2	67
Micrurus alleni	6			6
Ninia maculata	4			4
Oxyrhopus petolarius	1			1
Phrynonax poecilonotus	10	3		13
Rhadinella godmani	4	2		6
Sibon nebulatus	1			1
Siphlophis compressus	41	6	2	49
Spilotes pullatus	1			1
Stenorrhina degenhardtii	1	1		2
Tantilla supracincta	1			1
Grand Total	1246	190	63	1499
Number of sightings per month
Sum of Number Spotted	Column Labels
Row Labels	January	February	March	April	May	June	July	August	September	October	November	December	Grand Total
Boa imperator	3	2	7	5	2	9	1	2	1		4	2	38
Bothriechis schlegelii	1	3	1	1			3				3	1	13
Bothrops asper	3			1	2		2					4	12
Chironius flavopictus				1							1		2
Clelia clelia	3	1	1				1	1			2	3	12
Coniophanes fissidens			1								1	1	3
Corallus ruschenbergerii		1	3		1	1	1	2	1		2	2	14
Dendrophidion percarinatum	4		1	1	1		3				1		11
Enuliophis sclateri	10	12	10	11	9	9	10	9	6	3	8	16	113
Hydrophis platurus					1								1
Imantodes cenchoa	44	34	30	39	20	24	19	22	8	3	30	43	316
Leptodeira septentrionalis	97	96	89	90	50	48	82	58	37	12	64	63	786
Leptophis ahaetulla	3	2	6	2	2		1	1	1		1	4	23
Leptophis nebulosus				3			1						4
Mastigodryas melanolomus	13	3	5	11		4	6	6	4		7	8	67
Micrurus alleni	1	2								1	1	1	6
Ninia maculata	1	1		1								1	4
Oxyrhopus petolarius					1								1
Phrynonax poecilonotus	2		4	1	1		1		1		1	2	13
Rhadinella godmani	1	1									3	1	6
Sibon nebulatus		1											1
Siphlophis compressus	4	4	6	6	3	2	2	8	3	1	6	4	49
Spilotes pullatus			1										1
Stenorrhina degenhardtii				1								1	2
Tantilla supracincta	1												1
Grand Total	191	163	165	174	93	97	133	109	62	20	135	157	1499
Number of sightings per year
Sum of Number Spotted	Column Labels
Row Labels	2012	2013	2014	2015	2016	2017	Grand Total
Boa imperator	4	11	3	11	5	4	38
Bothriechis schlegelii	6	1	2	2	1	1	13
Bothrops asper	2	3	1	1	3	2	12
Chironius flavopictus		1		1			2
Clelia clelia	1		2	4	2	3	12
Coniophanes fissidens		1	2				3
Corallus ruschenbergerii		8	4		2		14
Dendrophidion percarinatum	3	3	1	3	1		11
Enuliophis sclateri	25	26	22	20	15	5	113
Hydrophis platurus	1						1
Imantodes cenchoa	92	47	59	66	28	24	316
Leptodeira septentrionalis	221	182	140	128	60	55	786
Leptophis ahaetulla	4	4	4	3	5	3	23
Leptophis nebulosus	3			1			4
Mastigodryas melanolomus	15	11	11	12	5	13	67
Micrurus alleni	1	2		2		1	6
Ninia maculata		1	1	1		1	4
Oxyrhopus petolarius				1			1
Phrynonax poecilonotus	3	5		3	1	1	13
Rhadinella godmani		1		3		2	6
Sibon nebulatus	1						1
Siphlophis compressus	12	10	13	11	3		49
Spilotes pullatus						1	1
Stenorrhina degenhardtii	2						2
Tantilla supracincta	1						1
Grand Total	397	317	265	273	131	116	1499
Number of field hours per year
Row Labels	Sum of Field Hours
2012	675
2013	640
2014	679.75
2015	765.5
2016	633.5
2017	667.75
Grand Total	4061.5
Number of field hours per month
Row Labels	Sum of Field Hours
January	483.5
February	453.5
March	496
April	437.75
May	198.25
June	255.25
July	364
August	345.75
September	101
October	44.25
November	343.5
December	538.75
Grand Total	4061.5
Number of field hours per month and year
Sum of Field Hours	Column Labels
Row Labels	January	February	March	April	May	June	July	August	September	October	November	December	Grand Total
2012	81.5	75.5	53.75	76	41.75	40.75	70	62.5	7.75	5	70	90.5	675
2013	68.5	69.75	80.5	76	40.75	30	72.25	31.75	18	13.25	53.25	86	640
2014	85.75	63	78.25	57	38.25	50.25	40	59.25	22.75	18	71	96.25	679.75
2015	89.5	82	109.5	76.75	44.25	41.5	60	69	35	2.75	60	95.25	765.5
2016	69.5	90.25	87.75	71		50.25	60.25	70.5	17.5		40.5	76	633.5
2017	88.75	73	86.25	81	33.25	42.5	61.5	52.75		5.25	48.75	94.75	667.75
Grand Total	483.5	453.5	496	437.75	198.25	255.25	364	345.75	101	44.25	343.5	538.75	4061.5

## Sheet: Boa imperator
Species	Year	Month	Number spotted	Field Hours	Number spotted/field hours				Sum of Number spotted/field hours	Column Labels
Boa imperator	2012	Jan	1	81.5	0.0122699				Row Labels	Jan	Feb	Mar	Apr	May	Jun	Jul	Aug	Sep	Oct	Nov	Dec	Grand Total
Boa imperator	2012	Feb	0	75.5	0				2012	0.0122699	0	0	0.0131579	0	0.0245399	0.0142857	0	0	0	0	0	0.0642534
Boa imperator	2012	Mar	0	53.75	0				2013	0.0291971	0	0.0124224	0	0.0245399	0.166667	0	0	0.0555556	0	0.0187793	0	0.307161
Boa imperator	2012	Apr	1	76	0.0131579				2014	0	0	0	0.0175439	0	0.039801	0	0	0	0	0	0	0.0573449
Boa imperator	2012	May	0	41.75	0				2015	0	0.0243902	0.00913242	0.0130293	0	0.0240964	0	0.0144928	0	0	0.05	0.0209974	0.156138
Boa imperator	2012	Jun	1	40.75	0.0245399				2016	0	0	0.045584	0	#DIV/0!	0	0	0.0141844	0	#DIV/0!	0	0	#DIV/0!
Boa imperator	2012	Jul	1	70	0.0142857				2017	0	0	0.0115942	0.0246914	0.0300752	0	0	0	#DIV/0!	0	0	0	#DIV/0!
Boa imperator	2012	Aug	0	62.5	0				Grand Total	0.041467	0.0243902	0.078733	0.0684224	#DIV/0!	0.255104	0.0142857	0.0286772	#DIV/0!	#DIV/0!	0.0687793	0.0209974	#DIV/0!
Boa imperator	2012	Sep	0	7.75	0
Boa imperator	2012	Oct	0	5	0
Boa imperator	2012	Nov	0	70	0
Boa imperator	2012	Dec	0	90.5	0
Boa imperator	2013	Jan	2	68.5	0.0291971
Boa imperator	2013	Feb	0	69.75	0
Boa imperator	2013	Mar	1	80.5	0.0124224
Boa imperator	2013	Apr	0	76	0
Boa imperator	2013	May	1	40.75	0.0245399
Boa imperator	2013	Jun	5	30	0.166667
Boa imperator	2013	Jul	0	72.25	0
Boa imperator	2013	Aug	0	31.75	0
Boa imperator	2013	Sep	1	18	0.0555556
Boa imperator	2013	Oct	0	13.25	0
Boa imperator	2013	Nov	1	53.25	0.0187793
Boa imperator	2013	Dec	0	86	0
Boa imperator	2014	Jan	0	85.75	0
Boa imperator	2014	Feb	0	63	0
Boa imperator	2014	Mar	0	78.25	0
Boa imperator	2014	Apr	1	57	0.0175439
Boa imperator	2014	May	0	38.25	0
Boa imperator	2014	Jun	2	50.25	0.039801
Boa imperator	2014	Jul	0	40	0
Boa imperator	2014	Aug	0	59.25	0
Boa imperator	2014	Sep	0	22.75	0
Boa imperator	2014	Oct	0	18	0
Boa imperator	2014	Nov	0	71	0
Boa imperator	2014	Dec	0	96.25	0
Boa imperator	2015	Jan	0	89.5	0
Boa imperator	2015	Feb	2	82	0.0243902
Boa imperator	2015	Mar	1	109.5	0.00913242
Boa imperator	2015	Apr	1	76.75	0.0130293
Boa imperator	2015	May	0	44.25	0
Boa imperator	2015	Jun	1	41.5	0.0240964
Boa imperator	2015	Jul	0	60	0
Boa imperator	2015	Aug	1	69	0.0144928
Boa imperator	2015	Sep	0	35	0
Boa imperator	2015	Oct	0	2.75	0
Boa imperator	2015	Nov	3	60	0.05
Boa imperator	2015	Dec	2	95.25	0.0209974
Boa imperator	2016	Jan	0	69.5	0
Boa imperator	2016	Feb	0	90.25	0
Boa imperator	2016	Mar	4	87.75	0.045584
Boa imperator	2016	Apr	0	71	0
Boa imperator	2016	May	0	0	#DIV/0!
Boa imperator	2016	Jun	0	50.25	0
Boa imperator	2016	Jul	0	60.25	0
Boa imperator	2016	Aug	1	70.5	0.0141844
Boa imperator	2016	Sep	0	17.5	0
Boa imperator	2016	Oct	0	0	#DIV/0!
Boa imperator	2016	Nov	0	40.5	0
Boa imperator	2016	Dec	0	76	0
Boa imperator	2017	Jan	0	88.75	0
Boa imperator	2017	Feb	0	73	0
Boa imperator	2017	Mar	1	86.25	0.0115942
Boa imperator	2017	Apr	2	81	0.0246914
Boa imperator	2017	May	1	33.25	0.0300752
Boa imperator	2017	Jun	0	42.5	0
Boa imperator	2017	Jul	0	61.5	0
Boa imperator	2017	Aug	0	52.75	0
Boa imperator	2017	Sep	0	0	#DIV/0!
Boa imperator	2017	Oct	0	5.25	0
Boa imperator	2017	Nov	0	48.75	0
Boa imperator	2017	Dec	0	94.75	0

## Sheet: Bothriechis schlegelii
Species	Year	Month	Number spotted	Field Hours	Number spotted/field hours				Sum of Number spotted/field hours	Column Labels
Bothriechis schlegelii	2012	Jan	0	81.5	0				Row Labels	Jan	Feb	Mar	Apr	May	Jun	Jul	Aug	Sep	Oct	Nov	Dec	(blank)	Grand Total
Bothriechis schlegelii	2012	Feb	0	75.5	0				2012	0	0	0	0	0	0	0.0285714	0	0	0	0.0428571	0.0110497		0.0824783
Bothriechis schlegelii	2012	Mar	0	53.75	0				2013	0	0.0143369	0	0	0	0	0	0	0	0	0	0		0.0143369
Bothriechis schlegelii	2012	Apr	0	76	0				2014	0	0	0.0127796	0.0175439	0	0	0	0	0	0	0	0		0.0303234
Bothriechis schlegelii	2012	May	0	41.75	0				2015	0	0.0121951	0	0	0	0	0.0166667	0	0	0	0	0		0.0288618
Bothriechis schlegelii	2012	Jun	0	40.75	0				2016	0	0.0110803	0	0	#DIV/0!	0	0	0	0	#DIV/0!	0	0		#DIV/0!
Bothriechis schlegelii	2012	Jul	2	70	0.0285714				2017	0.0112676	0	0	0	0	0	0	0	#DIV/0!	0	0	0		#DIV/0!
Bothriechis schlegelii	2012	Aug	0	62.5	0				(blank)
Bothriechis schlegelii	2012	Sep	0	7.75	0				Grand Total	0.0112676	0.0376124	0.0127796	0.0175439	#DIV/0!	0	0.0452381	0	#DIV/0!	#DIV/0!	0.0428571	0.0110497		#DIV/0!
Bothriechis schlegelii	2012	Oct	0	5	0
Bothriechis schlegelii	2012	Nov	3	70	0.0428571
Bothriechis schlegelii	2012	Dec	1	90.5	0.0110497
Bothriechis schlegelii	2013	Jan	0	68.5	0
Bothriechis schlegelii	2013	Feb	1	69.75	0.0143369
Bothriechis schlegelii	2013	Mar	0	80.5	0
Bothriechis schlegelii	2013	Apr	0	76	0
Bothriechis schlegelii	2013	May	0	40.75	0
Bothriechis schlegelii	2013	Jun	0	30	0
Bothriechis schlegelii	2013	Jul	0	72.25	0
Bothriechis schlegelii	2013	Aug	0	31.75	0
Bothriechis schlegelii	2013	Sep	0	18	0
Bothriechis schlegelii	2013	Oct	0	13.25	0
Bothriechis schlegelii	2013	Nov	0	53.25	0
Bothriechis schlegelii	2013	Dec	0	86	0
Bothriechis schlegelii	2014	Jan	0	85.75	0
Bothriechis schlegelii	2014	Feb	0	63	0
Bothriechis schlegelii	2014	Mar	1	78.25	0.0127796
Bothriechis schlegelii	2014	Apr	1	57	0.0175439
Bothriechis schlegelii	2014	May	0	38.25	0
Bothriechis schlegelii	2014	Jun	0	50.25	0
Bothriechis schlegelii	2014	Jul	0	40	0
Bothriechis schlegelii	2014	Aug	0	59.25	0
Bothriechis schlegelii	2014	Sep	0	22.75	0
Bothriechis schlegelii	2014	Oct	0	18	0
Bothriechis schlegelii	2014	Nov	0	71	0
Bothriechis schlegelii	2014	Dec	0	96.25	0
Bothriechis schlegelii	2015	Jan	0	89.5	0
Bothriechis schlegelii	2015	Feb	1	82	0.0121951
Bothriechis schlegelii	2015	Mar	0	109.5	0
Bothriechis schlegelii	2015	Apr	0	76.75	0
Bothriechis schlegelii	2015	May	0	44.25	0
Bothriechis schlegelii	2015	Jun	0	41.5	0
Bothriechis schlegelii	2015	Jul	1	60	0.0166667
Bothriechis schlegelii	2015	Aug	0	69	0
Bothriechis schlegelii	2015	Sep	0	35	0
Bothriechis schlegelii	2015	Oct	0	2.75	0
Bothriechis schlegelii	2015	Nov	0	60	0
Bothriechis schlegelii	2015	Dec	0	95.25	0
Bothriechis schlegelii	2016	Jan	0	69.5	0
Bothriechis schlegelii	2016	Feb	1	90.25	0.0110803
Bothriechis schlegelii	2016	Mar	0	87.75	0
Bothriechis schlegelii	2016	Apr	0	71	0
Bothriechis schlegelii	2016	May	0	0	#DIV/0!
Bothriechis schlegelii	2016	Jun	0	50.25	0
Bothriechis schlegelii	2016	Jul	0	60.25	0
Bothriechis schlegelii	2016	Aug	0	70.5	0
Bothriechis schlegelii	2016	Sep	0	17.5	0
Bothriechis schlegelii	2016	Oct	0	0	#DIV/0!
Bothriechis schlegelii	2016	Nov	0	40.5	0
Bothriechis schlegelii	2016	Dec	0	76	0
Bothriechis schlegelii	2017	Jan	1	88.75	0.0112676
Bothriechis schlegelii	2017	Feb	0	73	0
Bothriechis schlegelii	2017	Mar	0	86.25	0
Bothriechis schlegelii	2017	Apr	0	81	0
Bothriechis schlegelii	2017	May	0	33.25	0
Bothriechis schlegelii	2017	Jun	0	42.5	0
Bothriechis schlegelii	2017	Jul	0	61.5	0
Bothriechis schlegelii	2017	Aug	0	52.75	0
Bothriechis schlegelii	2017	Sep	0	0	#DIV/0!
Bothriechis schlegelii	2017	Oct	0	5.25	0
Bothriechis schlegelii	2017	Nov	0	48.75	0
Bothriechis schlegelii	2017	Dec	0	94.75	0

## Sheet: Bothrops asper
Species	Year	Month	Number spotted	Field Hours	Number spotted/field hours				Sum of Number spotted/field hours	Column Labels
Bothrops asper	2012	Jan	0	81.5	0				Row Labels	Jan	Feb	Mar	Apr	May	Jun	Jul	Aug	Sep	Oct	Nov	Dec	(blank)	Grand Total
Bothrops asper	2012	Feb	0	75.5	0				2012	0	0	0	0	0	0	0	0	0	0	0	0.0220994		0.0220994
Bothrops asper	2012	Mar	0	53.75	0				2013	0	0	0	0	0.0490798	0	0.0138408	0	0	0	0	0		0.0629206
Bothrops asper	2012	Apr	0	76	0				2014	0	0	0	0	0	0	0.025	0	0	0	0	0		0.025
Bothrops asper	2012	May	0	41.75	0				2015	0	0	0	0	0	0	0	0	0	0	0	0.0104987		0.0104987
Bothrops asper	2012	Jun	0	40.75	0				2016	0.028777	0	0	0.0140845	#DIV/0!	0	0	0	0	#DIV/0!	0	0		#DIV/0!
Bothrops asper	2012	Jul	0	70	0				2017	0.0112676	0	0	0	0	0	0	0	#DIV/0!	0	0	0.0105541		#DIV/0!
Bothrops asper	2012	Aug	0	62.5	0				(blank)
Bothrops asper	2012	Sep	0	7.75	0				Grand Total	0.0400446	0	0	0.0140845	#DIV/0!	0	0.0388408	0	#DIV/0!	#DIV/0!	0	0.0431522		#DIV/0!
Bothrops asper	2012	Oct	0	5	0
Bothrops asper	2012	Nov	0	70	0
Bothrops asper	2012	Dec	2	90.5	0.0220994
Bothrops asper	2013	Jan	0	68.5	0
Bothrops asper	2013	Feb	0	69.75	0
Bothrops asper	2013	Mar	0	80.5	0
Bothrops asper	2013	Apr	0	76	0
Bothrops asper	2013	May	2	40.75	0.0490798
Bothrops asper	2013	Jun	0	30	0
Bothrops asper	2013	Jul	1	72.25	0.0138408
Bothrops asper	2013	Aug	0	31.75	0
Bothrops asper	2013	Sep	0	18	0
Bothrops asper	2013	Oct	0	13.25	0
Bothrops asper	2013	Nov	0	53.25	0
Bothrops asper	2013	Dec	0	86	0
Bothrops asper	2014	Jan	0	85.75	0
Bothrops asper	2014	Feb	0	63	0
Bothrops asper	2014	Mar	0	78.25	0
Bothrops asper	2014	Apr	0	57	0
Bothrops asper	2014	May	0	38.25	0
Bothrops asper	2014	Jun	0	50.25	0
Bothrops asper	2014	Jul	1	40	0.025
Bothrops asper	2014	Aug	0	59.25	0
Bothrops asper	2014	Sep	0	22.75	0
Bothrops asper	2014	Oct	0	18	0
Bothrops asper	2014	Nov	0	71	0
Bothrops asper	2014	Dec	0	96.25	0
Bothrops asper	2015	Jan	0	89.5	0
Bothrops asper	2015	Feb	0	82	0
Bothrops asper	2015	Mar	0	109.5	0
Bothrops asper	2015	Apr	0	76.75	0
Bothrops asper	2015	May	0	44.25	0
Bothrops asper	2015	Jun	0	41.5	0
Bothrops asper	2015	Jul	0	60	0
Bothrops asper	2015	Aug	0	69	0
Bothrops asper	2015	Sep	0	35	0
Bothrops asper	2015	Oct	0	2.75	0
Bothrops asper	2015	Nov	0	60	0
Bothrops asper	2015	Dec	1	95.25	0.0104987
Bothrops asper	2016	Jan	2	69.5	0.028777
Bothrops asper	2016	Feb	0	90.25	0
Bothrops asper	2016	Mar	0	87.75	0
Bothrops asper	2016	Apr	1	71	0.0140845
Bothrops asper	2016	May	0	0	#DIV/0!
Bothrops asper	2016	Jun	0	50.25	0
Bothrops asper	2016	Jul	0	60.25	0
Bothrops asper	2016	Aug	0	70.5	0
Bothrops asper	2016	Sep	0	17.5	0
Bothrops asper	2016	Oct	0	0	#DIV/0!
Bothrops asper	2016	Nov	0	40.5	0
Bothrops asper	2016	Dec	0	76	0
Bothrops asper	2017	Jan	1	88.75	0.0112676
Bothrops asper	2017	Feb	0	73	0
Bothrops asper	2017	Mar	0	86.25	0
Bothrops asper	2017	Apr	0	81	0
Bothrops asper	2017	May	0	33.25	0
Bothrops asper	2017	Jun	0	42.5	0
Bothrops asper	2017	Jul	0	61.5	0
Bothrops asper	2017	Aug	0	52.75	0
Bothrops asper	2017	Sep	0	0	#DIV/0!
Bothrops asper	2017	Oct	0	5.25	0
Bothrops asper	2017	Nov	0	48.75	0
Bothrops asper	2017	Dec	1	94.75	0.0105541

## Sheet: Chironius flavopictus
Species	Year	Month	Number spotted	Field Hours	Number spotted/field hours				Sum of Number spotted/field hours	Column Labels
Chironius flavopictus	2012	Jan	0	81.5	0				Row Labels	Jan	Feb	Mar	Apr	May	Jun	Jul	Aug	Sep	Oct	Nov	Dec	(blank)	Grand Total
Chironius flavopictus	2012	Feb	0	75.5	0				2012	0	0	0	0	0	0	0	0	0	0	0	0		0
Chironius flavopictus	2012	Mar	0	53.75	0				2013	0	0	0	0	0	0	0	0	0	0	0.0187793	0		0.0187793
Chironius flavopictus	2012	Apr	0	76	0				2014	0	0	0	0	0	0	0	0	0	0	0	0		0
Chironius flavopictus	2012	May	0	41.75	0				2015	0	0	0	0.0130293	0	0	0	0	0	0	0	0		0.0130293
Chironius flavopictus	2012	Jun	0	40.75	0				2016	0	0	0	0	#DIV/0!	0	0	0	0	#DIV/0!	0	0		#DIV/0!
Chironius flavopictus	2012	Jul	0	70	0				2017	0	0	0	0	0	0	0	0	#DIV/0!	0	0	0		#DIV/0!
Chironius flavopictus	2012	Aug	0	62.5	0				(blank)
Chironius flavopictus	2012	Sep	0	7.75	0				Grand Total	0	0	0	0.0130293	#DIV/0!	0	0	0	#DIV/0!	#DIV/0!	0.0187793	0		#DIV/0!
Chironius flavopictus	2012	Oct	0	5	0
Chironius flavopictus	2012	Nov	0	70	0
Chironius flavopictus	2012	Dec	0	90.5	0
Chironius flavopictus	2013	Jan	0	68.5	0
Chironius flavopictus	2013	Feb	0	69.75	0
Chironius flavopictus	2013	Mar	0	80.5	0
Chironius flavopictus	2013	Apr	0	76	0
Chironius flavopictus	2013	May	0	40.75	0
Chironius flavopictus	2013	Jun	0	30	0
Chironius flavopictus	2013	Jul	0	72.25	0
Chironius flavopictus	2013	Aug	0	31.75	0
Chironius flavopictus	2013	Sep	0	18	0
Chironius flavopictus	2013	Oct	0	13.25	0
Chironius flavopictus	2013	Nov	1	53.25	0.0187793
Chironius flavopictus	2013	Dec	0	86	0
Chironius flavopictus	2014	Jan	0	85.75	0
Chironius flavopictus	2014	Feb	0	63	0
Chironius flavopictus	2014	Mar	0	78.25	0
Chironius flavopictus	2014	Apr	0	57	0
Chironius flavopictus	2014	May	0	38.25	0
Chironius flavopictus	2014	Jun	0	50.25	0
Chironius flavopictus	2014	Jul	0	40	0
Chironius flavopictus	2014	Aug	0	59.25	0
Chironius flavopictus	2014	Sep	0	22.75	0
Chironius flavopictus	2014	Oct	0	18	0
Chironius flavopictus	2014	Nov	0	71	0
Chironius flavopictus	2014	Dec	0	96.25	0
Chironius flavopictus	2015	Jan	0	89.5	0
Chironius flavopictus	2015	Feb	0	82	0
Chironius flavopictus	2015	Mar	0	109.5	0
Chironius flavopictus	2015	Apr	1	76.75	0.0130293
Chironius flavopictus	2015	May	0	44.25	0
Chironius flavopictus	2015	Jun	0	41.5	0
Chironius flavopictus	2015	Jul	0	60	0
Chironius flavopictus	2015	Aug	0	69	0
Chironius flavopictus	2015	Sep	0	35	0
Chironius flavopictus	2015	Oct	0	2.75	0
Chironius flavopictus	2015	Nov	0	60	0
Chironius flavopictus	2015	Dec	0	95.25	0
Chironius flavopictus	2016	Jan	0	69.5	0
Chironius flavopictus	2016	Feb	0	90.25	0
Chironius flavopictus	2016	Mar	0	87.75	0
Chironius flavopictus	2016	Apr	0	71	0
Chironius flavopictus	2016	May	0	0	#DIV/0!
Chironius flavopictus	2016	Jun	0	50.25	0
Chironius flavopictus	2016	Jul	0	60.25	0
Chironius flavopictus	2016	Aug	0	70.5	0
Chironius flavopictus	2016	Sep	0	17.5	0
Chironius flavopictus	2016	Oct	0	0	#DIV/0!
Chironius flavopictus	2016	Nov	0	40.5	0
Chironius flavopictus	2016	Dec	0	76	0
Chironius flavopictus	2017	Jan	0	88.75	0
Chironius flavopictus	2017	Feb	0	73	0
Chironius flavopictus	2017	Mar	0	86.25	0
Chironius flavopictus	2017	Apr	0	81	0
Chironius flavopictus	2017	May	0	33.25	0
Chironius flavopictus	2017	Jun	0	42.5	0
Chironius flavopictus	2017	Jul	0	61.5	0
Chironius flavopictus	2017	Aug	0	52.75	0
Chironius flavopictus	2017	Sep	0	0	#DIV/0!
Chironius flavopictus	2017	Oct	0	5.25	0
Chironius flavopictus	2017	Nov	0	48.75	0
Chironius flavopictus	2017	Dec	0	94.75	0

## Sheet: Clelia clelia
Species	Year	Month	Number spotted	Field Hours	Number spotted/field hours				Sum of Number spotted/field hours	Column Labels
Clelia clelia	2012	Jan	0	81.5	0				Row Labels	Jan	Feb	Mar	Apr	May	Jun	Jul	Aug	Sep	Oct	Nov	Dec	(blank)	Grand Total
Clelia clelia	2012	Feb	0	75.5	0				2012	0	0	0	0	0	0	0.0142857	0	0	0	0	0		0.0142857
Clelia clelia	2012	Mar	0	53.75	0				2013	0	0	0	0	0	0	0	0	0	0	0	0		0
Clelia clelia	2012	Apr	0	76	0				2014	0	0	0	0	0	0	0	0	0	0	0.0140845	0.0103896		0.0244741
Clelia clelia	2012	May	0	41.75	0				2015	0.0111732	0.0121951	0.00913242	0	0	0	0	0	0	0	0	0.0104987		0.0429994
Clelia clelia	2012	Jun	0	40.75	0				2016	0	0	0	0	#DIV/0!	0	0	0	0	#DIV/0!	0.0246914	0.0131579		#DIV/0!
Clelia clelia	2012	Jul	1	70	0.0142857				2017	0.0225352	0	0	0	0	0	0	0.0189573	#DIV/0!	0	0	0		#DIV/0!
Clelia clelia	2012	Aug	0	62.5	0				(blank)
Clelia clelia	2012	Sep	0	7.75	0				Grand Total	0.0337084	0.0121951	0.00913242	0	#DIV/0!	0	0.0142857	0.0189573	#DIV/0!	#DIV/0!	0.0387759	0.0340462		#DIV/0!
Clelia clelia	2012	Oct	0	5	0
Clelia clelia	2012	Nov	0	70	0
Clelia clelia	2012	Dec	0	90.5	0
Clelia clelia	2013	Jan	0	68.5	0
Clelia clelia	2013	Feb	0	69.75	0
Clelia clelia	2013	Mar	0	80.5	0
Clelia clelia	2013	Apr	0	76	0
Clelia clelia	2013	May	0	40.75	0
Clelia clelia	2013	Jun	0	30	0
Clelia clelia	2013	Jul	0	72.25	0
Clelia clelia	2013	Aug	0	31.75	0
Clelia clelia	2013	Sep	0	18	0
Clelia clelia	2013	Oct	0	13.25	0
Clelia clelia	2013	Nov	0	53.25	0
Clelia clelia	2013	Dec	0	86	0
Clelia clelia	2014	Jan	0	85.75	0
Clelia clelia	2014	Feb	0	63	0
Clelia clelia	2014	Mar	0	78.25	0
Clelia clelia	2014	Apr	0	57	0
Clelia clelia	2014	May	0	38.25	0
Clelia clelia	2014	Jun	0	50.25	0
Clelia clelia	2014	Jul	0	40	0
Clelia clelia	2014	Aug	0	59.25	0
Clelia clelia	2014	Sep	0	22.75	0
Clelia clelia	2014	Oct	0	18	0
Clelia clelia	2014	Nov	1	71	0.0140845
Clelia clelia	2014	Dec	1	96.25	0.0103896
Clelia clelia	2015	Jan	1	89.5	0.0111732
Clelia clelia	2015	Feb	1	82	0.0121951
Clelia clelia	2015	Mar	1	109.5	0.00913242
Clelia clelia	2015	Apr	0	76.75	0
Clelia clelia	2015	May	0	44.25	0
Clelia clelia	2015	Jun	0	41.5	0
Clelia clelia	2015	Jul	0	60	0
Clelia clelia	2015	Aug	0	69	0
Clelia clelia	2015	Sep	0	35	0
Clelia clelia	2015	Oct	0	2.75	0
Clelia clelia	2015	Nov	0	60	0
Clelia clelia	2015	Dec	1	95.25	0.0104987
Clelia clelia	2016	Jan	0	69.5	0
Clelia clelia	2016	Feb	0	90.25	0
Clelia clelia	2016	Mar	0	87.75	0
Clelia clelia	2016	Apr	0	71	0
Clelia clelia	2016	May	0	0	#DIV/0!
Clelia clelia	2016	Jun	0	50.25	0
Clelia clelia	2016	Jul	0	60.25	0
Clelia clelia	2016	Aug	0	70.5	0
Clelia clelia	2016	Sep	0	17.5	0
Clelia clelia	2016	Oct	0	0	#DIV/0!
Clelia clelia	2016	Nov	1	40.5	0.0246914
Clelia clelia	2016	Dec	1	76	0.0131579
Clelia clelia	2017	Jan	2	88.75	0.0225352
Clelia clelia	2017	Feb	0	73	0
Clelia clelia	2017	Mar	0	86.25	0
Clelia clelia	2017	Apr	0	81	0
Clelia clelia	2017	May	0	33.25	0
Clelia clelia	2017	Jun	0	42.5	0
Clelia clelia	2017	Jul	0	61.5	0
Clelia clelia	2017	Aug	1	52.75	0.0189573
Clelia clelia	2017	Sep	0	0	#DIV/0!
Clelia clelia	2017	Oct	0	5.25	0
Clelia clelia	2017	Nov	0	48.75	0
Clelia clelia	2017	Dec	0	94.75	0

## Sheet: Coniophanes fissidens
Species	Year	Month	Number spotted	Field Hours	Number spotted/field hours				Sum of Number spotted/field hours	Column Labels
Coniophanes fissidens	2012	Jan	0	81.5	0				Row Labels	Jan	Feb	Mar	Apr	May	Jun	Jul	Aug	Sep	Oct	Nov	Dec	(blank)	Grand Total
Coniophanes fissidens	2012	Feb	0	75.5	0				2012	0	0	0	0	0	0	0	0	0	0	0	0		0
Coniophanes fissidens	2012	Mar	0	53.75	0				2013	0	0	0.0124224	0	0	0	0	0	0	0	0	0		0.0124224
Coniophanes fissidens	2012	Apr	0	76	0				2014	0	0	0	0	0	0	0	0	0	0	0.0140845	0.0103896		0.0244741
Coniophanes fissidens	2012	May	0	41.75	0				2015	0	0	0	0	0	0	0	0	0	0	0	0		0
Coniophanes fissidens	2012	Jun	0	40.75	0				2016	0	0	0	0	#DIV/0!	0	0	0	0	#DIV/0!	0	0		#DIV/0!
Coniophanes fissidens	2012	Jul	0	70	0				2017	0	0	0	0	0	0	0	0	#DIV/0!	0	0	0		#DIV/0!
Coniophanes fissidens	2012	Aug	0	62.5	0				(blank)
Coniophanes fissidens	2012	Sep	0	7.75	0				Grand Total	0	0	0.0124224	0	#DIV/0!	0	0	0	#DIV/0!	#DIV/0!	0.0140845	0.0103896		#DIV/0!
Coniophanes fissidens	2012	Oct	0	5	0
Coniophanes fissidens	2012	Nov	0	70	0
Coniophanes fissidens	2012	Dec	0	90.5	0
Coniophanes fissidens	2013	Jan	0	68.5	0
Coniophanes fissidens	2013	Feb	0	69.75	0
Coniophanes fissidens	2013	Mar	1	80.5	0.0124224
Coniophanes fissidens	2013	Apr	0	76	0
Coniophanes fissidens	2013	May	0	40.75	0
Coniophanes fissidens	2013	Jun	0	30	0
Coniophanes fissidens	2013	Jul	0	72.25	0
Coniophanes fissidens	2013	Aug	0	31.75	0
Coniophanes fissidens	2013	Sep	0	18	0
Coniophanes fissidens	2013	Oct	0	13.25	0
Coniophanes fissidens	2013	Nov	0	53.25	0
Coniophanes fissidens	2013	Dec	0	86	0
Coniophanes fissidens	2014	Jan	0	85.75	0
Coniophanes fissidens	2014	Feb	0	63	0
Coniophanes fissidens	2014	Mar	0	78.25	0
Coniophanes fissidens	2014	Apr	0	57	0
Coniophanes fissidens	2014	May	0	38.25	0
Coniophanes fissidens	2014	Jun	0	50.25	0
Coniophanes fissidens	2014	Jul	0	40	0
Coniophanes fissidens	2014	Aug	0	59.25	0
Coniophanes fissidens	2014	Sep	0	22.75	0
Coniophanes fissidens	2014	Oct	0	18	0
Coniophanes fissidens	2014	Nov	1	71	0.0140845
Coniophanes fissidens	2014	Dec	1	96.25	0.0103896
Coniophanes fissidens	2015	Jan	0	89.5	0
Coniophanes fissidens	2015	Feb	0	82	0
Coniophanes fissidens	2015	Mar	0	109.5	0
Coniophanes fissidens	2015	Apr	0	76.75	0
Coniophanes fissidens	2015	May	0	44.25	0
Coniophanes fissidens	2015	Jun	0	41.5	0
Coniophanes fissidens	2015	Jul	0	60	0
Coniophanes fissidens	2015	Aug	0	69	0
Coniophanes fissidens	2015	Sep	0	35	0
Coniophanes fissidens	2015	Oct	0	2.75	0
Coniophanes fissidens	2015	Nov	0	60	0
Coniophanes fissidens	2015	Dec	0	95.25	0
Coniophanes fissidens	2016	Jan	0	69.5	0
Coniophanes fissidens	2016	Feb	0	90.25	0
Coniophanes fissidens	2016	Mar	0	87.75	0
Coniophanes fissidens	2016	Apr	0	71	0
Coniophanes fissidens	2016	May	0	0	#DIV/0!
Coniophanes fissidens	2016	Jun	0	50.25	0
Coniophanes fissidens	2016	Jul	0	60.25	0
Coniophanes fissidens	2016	Aug	0	70.5	0
Coniophanes fissidens	2016	Sep	0	17.5	0
Coniophanes fissidens	2016	Oct	0	0	#DIV/0!
Coniophanes fissidens	2016	Nov	0	40.5	0
Coniophanes fissidens	2016	Dec	0	76	0
Coniophanes fissidens	2017	Jan	0	88.75	0
Coniophanes fissidens	2017	Feb	0	73	0
Coniophanes fissidens	2017	Mar	0	86.25	0
Coniophanes fissidens	2017	Apr	0	81	0
Coniophanes fissidens	2017	May	0	33.25	0
Coniophanes fissidens	2017	Jun	0	42.5	0
Coniophanes fissidens	2017	Jul	0	61.5	0
Coniophanes fissidens	2017	Aug	0	52.75	0
Coniophanes fissidens	2017	Sep	0	0	#DIV/0!
Coniophanes fissidens	2017	Oct	0	5.25	0
Coniophanes fissidens	2017	Nov	0	48.75	0
Coniophanes fissidens	2017	Dec	0	94.75	0

[truncated: 20 more sheets: Corallus ruschenbergerii, Dendrophidion percarinatum, Enuliophis sclateri, Hydrophis platurus, Imantodes cenchoa, Leptodeira septentrionalis, Leptophis ahaetulla, Leptophis nebulosus, Mastigodryas melanolomus, Micrurus alleni, Ninia maculata, Oxyrhopus petolarius, Phrynonax poecilonotus, Rhadinella godmani, Sibon nebulatus, Siphlophis compressus, Spilotes pullatus, Stenorrhina degenhardtii, Tantilla supracincta, tabla dinamica por spp]
